# Supplementary material for: CRISPR-based functional genomics in human dendritic cells
Source: eLife journal article supplement (doi:10.7554/elife.65856), 2021-04-27
Supplement: supp [file elife-65856-supp-v1.zip]

Archive with 19 entries (19 files):
- elife_poa_e65856_Figure_1_figure_supplement_1.pdf
- elife_poa_e65856_Figure_1_figure_supplement_2.pdf
- elife_poa_e65856_Figure_1_figure_supplement_3.pdf
- elife_poa_e65856_Figure_1_figure_supplement_4.pdf
- elife_poa_e65856_Figure_1_figure_supplement_5.pdf
- elife_poa_e65856_Figure_2_figure_supplement_1.pdf
- elife_poa_e65856_Figure_2_figure_supplement_2.pdf
- elife_poa_e65856_Figure_2_figure_supplement_3.pdf
- elife_poa_e65856_Figure_3_figure_supplement_1.pdf
- elife_poa_e65856_Figure_3_figure_supplement_2.pdf
- elife_poa_e65856_Figure_3_figure_supplement_3.pdf
- elife_poa_e65856_Figure_3_figure_supplement_4.pdf
- elife_poa_e65856_Figure_3_figure_supplement_5.pdf
- elife_poa_e65856_Figure_3_figure_supplement_6.pdf
- elife_poa_e65856_Supplementary_file_1.xlsx
- elife_poa_e65856_Supplementary_file_2.xlsx
- elife_poa_e65856_Supplementary_file_3.xlsx
- elife_poa_e65856_Supplementary_file_4.xlsx
- elife_poa_e65856_Transparent_Reporting_File.docx
