# Supplementary material for: CRISPR-based functional genomics in human dendritic cells
Source: eLife journal article supplement (doi:10.7554/elife.65856), 2021-04-27
Supplement: supp [file elife-65856-supp-v1.zip › elife_poa_e65856_Figure_3_figure_supplement_1.pdf]

# Figure 3 - Figure Supplement 1

■ Targeted gene   
 ■ Neutral control   
 ■ Positive control   
 ■ Essential control   
 ■ Non-targeting control

## Plate 1

|   | 1        | 2       | 3      | 4       | 5       | 6        | 7       | 8       | 9     | 10      | 11      | 12 |
|---|----------|---------|--------|---------|---------|----------|---------|---------|-------|---------|---------|----|
| A | OR2D2    | CD300C  | TAS2R9 | U2AF2   | RAF1    | NLRP2B   | FCN3    | SIGLEC5 | KLRK1 | CLEC18B | IKBKG   |    |
| B | ZFP36    | OR51T1  | NCAN   | SIGLEC6 | KSR1    | NTC 1    | CLEC12A | NFKB1   | SFTPD | SDC3    | LGALS7B |    |
| C | RELA     | IL1RL1  | BTX    | NLRP10  | NLRP6   | CLEC6A   | ATRN    | IRF7    | LSP1  | NLRP11  | NLRP3   |    |
| D | FCGR1A   | KLRG1   | CLEC4M | MARCO   | CREB1   | SRC      | NFKB2   | LALBA   | STAT1 | CHODL   | F13B    |    |
| E | MB21D1   | REL     | KLRC3  | CLEC10A | CLEC2B  | CEBPB    | NTC 2   | TLR1    | SSC5D | KCNV1   | PTPN11  |    |
| F | SIGLEC7  | MBL2    | POLR2A | SYK     | LMAN2   | ARHGEF2  | TLR9    | LY9     | NLRX1 | TRHR    | MAP3K1  |    |
| G | SIGLECL1 | CD276   | CASP8  | TNF     | KLR4    | SODCS3   | ASGR1   | DHX58   | LCP2  | MRC1    | LGALS7  |    |
| H | RPE65    | LGALS9B | TRIM47 | CALM1   | CLEC20A | SIGLEC11 | RELB    | CBLB    | TREM2 | PAK1    | CRX     |    |

## Plate 2

|   | 1      | 2       | 3       | 4       | 5      | 6       | 7       | 8        | 9        | 10      | 11     | 12 |
|---|--------|---------|---------|---------|--------|---------|---------|----------|----------|---------|--------|----|
| A | TIRAP  | LY75    | RNF216  | KCNV1   | LGALS8 | CLEC1A  | TNF     | LGALS3   | FCN2     | CD207   | TICAM2 |    |
| B | CLEC7A | REG4    | CD180   | SIGLEC1 | BIRC2  | STAT2   | OR2D2   | CRX      | CLEC2A   | PTPN6   | CLEC1B |    |
| C | ASGR2  | U2AF2   | CLEC17A | CLEC18A | CLECL1 | TLR3    | CD1D    | CD14     | TICAM1   | TLR5    | DGCR2  |    |
| D | IGSF6  | RIPK2   | NLRP7   | CLEC4D  | MAP3K8 | F13B    | COLEC12 | FCER1A   | MRC2     | PIK3CD  | PIK3CG |    |
| E | CD33   | CLEC11A | MALT1   | RPE65   | KLR2   | IL1B    | OR51T1  | CALCOCO2 | LMAN2L   | SIRPB1  | LGALS9 |    |
| F | ATRN1  | NLRP4   | NLRP9   | CARD9   | TIFA   | POLR2A  | CLEC18C | PRG3     | NTC 2    | LGALS12 | CHID1  |    |
| G | NFKBIA | MAP3K14 | CLEC19A | SDC2    | MAP3K7 | CHUK    | SODCS1  | THBD     | SIGLEC12 | TRHR    | BCAN   |    |
| H | CD69   | RIPK1   | UBE2N   | LY96    | LGALS1 | LGALS16 | RAC1    | TAS2R9   | LALBA    | NTC 1   | TLR7   |    |

## Plate 3

|   | 1       | 2      | 3       | 4        | 5      | 6      | 7       | 8      | 9       | 10     | 11      | 12 |
|---|---------|--------|---------|----------|--------|--------|---------|--------|---------|--------|---------|----|
| A | BCL10   | AKT1   | COLEC10 | IL10     | NLRP8  | TLR8   | NLRP1   | CD302  | TRHR    | IRAK4  | NTC 2   |    |
| B | CLEC2D  | KLR1   | CLEC16A | NLRP13   | TNF    | TAS2R9 | KLR1    | OR51T1 | TNFAIP3 | IRAK1  | SFTPA1  |    |
| C | KLRB1   | KLRG2  | KLRD1   | FADD     | TLR4   | ACAN   | PILRA   | TAB1   | IRF3    | PRG2   | NLR3    |    |
| D | IRF1    | CLEC3B | PLA2R1  | SIRPA    | PLCG1  | MAPK14 | PVR     | RPE65  | CLEC9A  | PKD1   | VSIR    |    |
| E | CLEC4A  | LMAN1L | REG3A   | SIGLEC15 | LALBA  | AIM2   | CRX     | CD300A | OR2D2   | NTC 1  | CD72    |    |
| F | BIRC3   | LBP    | KCNV1   | F13B     | CLEC5A | TREM1  | CD248   | VCAN   | SDC1    | KLR2   | COLEC11 |    |
| G | CD300LB | CLC    | SDC4    | CD1C     | CLEC4F | TLR6   | LGALS14 | CASP1  | BLNK    | CLEC4G | REG3G   |    |
| H | CD48    | ALCAM  | ALPK1   | CLEC4C   | POLR2A | LGALS2 | U2AF2   | CLEC3A | CLEC4E  | CLEC2L | MYD88   |    |

## Plate 4

|   | 1       | 2      | 3        | 4        | 5      | 6      | 7      | 8       | 9       | 10      | 11     | 12 |
|---|---------|--------|----------|----------|--------|--------|--------|---------|---------|---------|--------|----|
| A | LAYN    | NLRP12 | LGALS13  | LY86     | SELP   | FCN1   | POLR2A | VAV1    | SELE    | TNF     | NLRP14 |    |
| B | CD42    | REG1B  | CLEC14A  | SIGLEC14 | OR51T1 | SFTPA2 | TRAF3  | F13B    | CLEC12B | JUN     | TLR10  |    |
| C | CASP2   | MAVS   | CRX      | OLR1     | OR2D2  | DDX3X  | HMGB1  | PKD1L3  | TRAF6   | CD274   | TYROBP |    |
| D | PLOG2   | PYCARD | ECSIT    | FCER2    | HAVCR2 | DD83   | NLR4   | NOD2    | CD22    | TAB2    |        |    |
| E | NTC 1   | U2AF2  | RPE65    | PRKCD    | TAB3   | IRAK3  | NLRP2  | NTC 2   | NLR5    | MPZL1   |        |    |
| F | LMAN1   | LALBA  | NLRP5    | FCER1G   | TRHR   | RHOA   | IFIH1  | UNC93B1 | NOD1    | CD300E  |        |    |
| G | SIGLEC8 | BCL3   | SIGLEC10 | SIGLEC9  | PPP3R1 | KCNV1  | CD209  | SELL    | CD300LF | LGALS9C |        |    |
| H | TBK1    | LGALS4 | REG1A    | MAG      | CD93   | TLR2   | DDX58  | FREM1   | TMEM173 | TAS2R9  |        |    |
