# Supplementary material for: CRISPR-based functional genomics in human dendritic cells
Source: eLife journal article supplement (doi:10.7554/elife.65856), 2021-04-27
Supplement: supp [file elife-65856-supp-v1.zip › elife_poa_e65856_Supplementary_file_1.xlsx]

## Sheet: sgRNA_sequences
description	gene	used for	number of sgRNAs	target sequences (replace T with U to get sgRNA sequences)	chromosome	binding locations	amplification primers	fw amplification primer	rv amplification primer
AAVS1 (initial test)	AAVS1	initial test	1	GGGGCCACTAGGGACAGGAT	chr19	55115768	AACAGGAGGTGGGGGTTAGA;CATGGCATCTTCCAGGGGTC	AACAGGAGGTGGGGGTTAGA	CATGGCATCTTCCAGGGGTC
TNF (initial test, Brunello)	TNF	initial test, optimization	1	TTGGAGTGATCGGCCCCCAG	chr6	31575916	CCTCTCTCCCCTGGAAAGGA;GTGGGAGAGTGGATGAAGGC	CCTCTCTCCCCTGGAAAGGA	GTGGGAGAGTGGATGAAGGC
TLR4 (initial test, Brunello)	TLR4	initial test	1	ATAAGTCAATAATATCATCG	chr9	117713022	TCTGCTCTAGAGGGCCTGTG;AAGCATTCCCACCTTTGTTGG	TCTGCTCTAGAGGGCCTGTG	AAGCATTCCCACCTTTGTTGG
TNF (multiplexed)	TNF	benchmarking, optimization	3	GGAGCTGCCCCTCAGCTTGA;ATCTCTCAGCTCCACGCCAT;CGGCGATGCGGCTGATGGTG	chr6	31577126;31577182;31577300	GGATGACAGACAGAGAGGACAG;GGGGCTCTTGATGGCAGAGA	GGATGACAGACAGAGAGGACAG	GGGGCTCTTGATGGCAGAGA
TLR4 (multiplexed)	TLR4	benchmarking, double KO, optimization	3	ATGCATTGATAAGTAATATT;GTCCAGGTTCTTGGTTGAGA;TGCAGGTGCTGGATTTATCC	chr9	117708575;117708633;117708725	CTGGTCTAGGAGAGGGGAGT;CTCCACAAACCAAGCTTTCCA	CTGGTCTAGGAGAGGGGAGT	CTCCACAAACCAAGCTTTCCA
CXCR4 (multiplexed)	CXCR4	optimization	2	AAGATGATGGAGTAGATGGT;CACTTCAGATAACTACACCG	chr2	136115799;136115891	TTGTGCCCTTAGCCCACTAC;AGGTGCAGCCTGTACTTGTC	TTGTGCCCTTAGCCCACTAC	AGGTGCAGCCTGTACTTGTC
CXCR4 (single)	CXCR4	optimization	1	GAAGCGTGATGACAAAGAGG	chr2	136115670	CCCACCATCTACTCCATCATCT;TTGCATAGGAAGTTCCCAAAGT	CCCACCATCTACTCCATCATCT	TTGCATAGGAAGTTCCCAAAGT
TLR2 (multiplexed)	TLR2	benchmarking, double KO	3	ACAAGACAGAGAAGCCTGAT;ACAGCTTCTGTGAGCCCTGA;GGAGGTTCACACACCTCTGT	chr4	153702981;153703052;153703126	TGTGGATGGTGTGGGTCTTG;AAGGGGCTTGAACCAGGAAG	TGTGGATGGTGTGGGTCTTG	AAGGGGCTTGAACCAGGAAG
MYD88 (multiplexed)	MYD88	benchmarking	3	TCCTGGAGCCTCAGCGCGGT;GGAGGATGTGGAGGAGACCG;GTTCTTGAACGTGCGGACAC	chr3	38138675;38138741;38138822	CTTCTCGGAAAGCGAAAGCC;GTCTCCAGTTGCCGGATCTC	CTTCTCGGAAAGCGAAAGCC	GTCTCCAGTTGCCGGATCTC
TICAM1 (multiplexed)	TICAM1	benchmarking	3	GGTGTTTCGGACTGGAGCCA;CCATCCTCGGCTTTGCCCTC;CAGCAATGTCCCACCCACAC	chr19	4817812;4817863;4817947	TGGCTGATTTCCAAGTTGCTG;CCGCTTGTACCACCTGCT	TGGCTGATTTCCAAGTTGCTG	CCGCTTGTACCACCTGCT
IRF3 (multiplexed)	IRF3	benchmarking	3	CCGCTTCAGTGGGTTCTCAG;GTCCAAGCTGGGGCTCCGCA;GGGGGTCCCGGATCTGGGAG	chr19	49662461;49662512;49662570	CCGGTAGAAGGCTGTCACC;CCTGGTCCATATGAAGTCTCCA	CCGGTAGAAGGCTGTCACC	CCTGGTCCATATGAAGTCTCCA
IFNB1 (multiplexed)	IFNB1	benchmarking	3	TTGAATACTGCCTCAAGGAC;GAAAATTGCTGCTTCTTTGT;AGCACAACAGGAGAGCAATT	chr9	21077708;21077778;21077844	CCTTTGCTCTGGCACAACAG;TAGATGGTCAATGCGGCGTC	CCTTTGCTCTGGCACAACAG	TAGATGGTCAATGCGGCGTC
RPE65 (multiplexed)	RPE65	benchmarking	3	GAGTGCTGCTTTACCTTCTG;GGGCTTGCCCATCAAACAGG;TCACAGGCAGGATCCCCCTC	chr1	68446713;68446776;68446850	AAGCCACTCATGTTGGACCC;TGCCTTACCAAGGACAAGCC	AAGCCACTCATGTTGGACCC	TGCCTTACCAAGGACAAGCC
SYK (multiplexed)	SYK	benchmarking	3	GGTGATGTTGCCGAAAAAGA;CGCCAGAGCCGCAACTACCT;GCTCCCGCTCGATGGTGTAG	chr9	90843945;90844039;90844090	CCTGAAGCATGGCCAGCAG;CAGACCAGGCCATCAGACTC	CCTGAAGCATGGCCAGCAG	CAGACCAGGCCATCAGACTC
RAF1 (multiplexed)	RAF1	benchmarking	3	ATAGTGTTGCTTGTCTTAGA;GCAGTTTGGCTATCAGCGCC;TGCATCAATGGAGCACATAC	chr3	12618566;12618604;12618712	TTATGTATTGTGTTCTTGGGTTGAA;TGTGCTCCACAGGCAGATAAAT	TTATGTATTGTGTTCTTGGGTTGAA	TGTGCTCCACAGGCAGATAAAT
B2M (multiplexed)	B2M	benchmarking	3	CGGAGCGAGAGAGCACAGCG;GGCCGAGATGTCTCGCTCCG;ACTCACGCTGGATAGCCTCC	chr15	44711677;44711540;44711600	GGCTGGGCACGCGTTTAATA;CGCTTATCGACGCCCTAAAC	GGCTGGGCACGCGTTTAATA	CGCTTATCGACGCCCTAAAC
CD14 (multiplexed)	CD14	benchmarking	3	CCTCTACTGCAGACACACAC;CGGAGAAGTTGCAGACGCAG;GTCGCAGAGACGTGCACCAG	chr5	140632832;140632883;140632942	GCCTTGACCGTGTCAGCATA;AAGCACTTCCAGAGCCTGTC	GCCTTGACCGTGTCAGCATA	AAGCACTTCCAGAGCCTGTC
LY96 (multiplexed)	LY96	benchmarking	3	AGGGTGGAAAAAAACAGAAA;GGTGTATGAAATACTTGCAT;TTGTAGCATCAACTATTTTG	chr8	73991455;73991531;73991597	TGCTTACTGAAAAGGAAGAGTCTGA;TGATGTTTCGTGTGTTCCAGC	TGCTTACTGAAAAGGAAGAGTCTGA	TGATGTTTCGTGTGTTCCAGC
ACAN (screen)	ACAN	screen	3	GAGCCGTGTGTCCAAGGAGA;GGTCTCACTGCCCAACTACC;AGCCTGCGCTCCAATGACTC	chr15	88838834;88838918;88838973	TTTCATCGACCCCATGCACC;GCTCTCACCTTTCACCACGA	TTTCATCGACCCCATGCACC	GCTCTCACCTTTCACCACGA
AIM2 (screen)	AIM2	screen	3	GGAGATGTTTCATGCTACAG;TTTGCTTTCAGTACCATAAC;GAAACAGATGGTGGCCCAGC	chr1	159066188;159066258;159066305	GCATCTAACACACGTGAGGC;GCTGGCTTTCTGAGGTTTAGC	GCATCTAACACACGTGAGGC	GCTGGCTTTCTGAGGTTTAGC
AKT1 (screen)	AKT1	screen	3	CGCCACAGAGAAGTTGTTGA;CCGCTCCTTGTAGCCAATGA;TAGGGGAGTACATCAAGACC	chr14	104780106;104780157;104780203	CCCCCAAATCTGAATCCCGA;TCGCTGGCCCTAAGAAACAG	CCCCCAAATCTGAATCCCGA	TCGCTGGCCCTAAGAAACAG
ALCAM (screen)	ALCAM	screen	3	GGTGGTCATAATTTTTAAAA;CTTGGTTGTCTTGTACTCCA;GAAAACAATTCATTCTGAAC	chr3	105534681;105534732;105534822	AGGTGTGGTGCTGTTTCGTT;CATCAATTTGGGGTGCAGACTG	AGGTGTGGTGCTGTTTCGTT	CATCAATTTGGGGTGCAGACTG
ALPK1 (screen)	ALPK1	screen	3	CATCCTCGCTCGGGACTGTG;CTGTATGGGCTCGACGTCTC;AGTTCACGGAGATTCGGGCT	chr4	112411861;112411919;112412006	CACGATGTTCCACGCTGTTC;GTCAAGTAGCTCGGGAGGGA	CACGATGTTCCACGCTGTTC	GTCAAGTAGCTCGGGAGGGA
ARHGEF2 (screen)	ARHGEF2	screen	3	ACAACTTACTTGGGCAGATG;AGAGGTGCCCATTGGTATAG;CCTTCCACAGACCCGGGAAA	chr1	155969164;155969257;155969294	GGATCAGAGAGAAGAGTGACCC;TGTCTTTCCAGCATCCTCAGG	GGATCAGAGAGAAGAGTGACCC	TGTCTTTCCAGCATCCTCAGG
ASGR1 (screen)	ASGR1	screen	3	TCTCCCGCTCAGGCTCAGAA;TGGCCTCCTTACCATTGCCC;AGCAGTTCGTGTCTGACCTG	chr17	7174285;7174379;7174417	GTAGTTGTCGGCGTCAGCC;TGCTGTTTGTGGCAATGCG	GTAGTTGTCGGCGTCAGCC	TGCTGTTTGTGGCAATGCG
ASGR2 (screen)	ASGR2	screen	3	GCACACTTGCCTTTCAAAAA;TGCCTGGCCCCTCACCTTGA;CTGGATATCTTGAAAGTCCT	chr17	7114124;7114176;7114231	GTGAGGTGAGGGAACAAGCG;CACCATCAACCTCCACGTGA	GTGAGGTGAGGGAACAAGCG	CACCATCAACCTCCACGTGA
ATRN (screen)	ATRN	screen	3	CATACTGCTCCTTTGCCTTA;GTGGTCATGCTGGTCATCTT;AATGTGCAGGAATATGATTT	chr20	3560769;3560850;3560901	ACTGGGAATGTGACCAATGAGT;CCGAATCAAGATTAGGTTGAACTTT	ACTGGGAATGTGACCAATGAGT	CCGAATCAAGATTAGGTTGAACTTT
ATRNL1 (screen)	ATRNL1	screen	3	GGTGTGGAGGGCTCGGCCGG;CTACCTGGCGCTCTACGCGC;GCGGCCCGAGAAGCAGGAGC	chr10	115093821;115093914;115093953	GGGAAGATGGAGACTGGGG;ACTTACTTGAACCTGCCCTGG	GGGAAGATGGAGACTGGGG	ACTTACTTGAACCTGCCCTGG
BCAN (screen)	BCAN	screen	3	GCTTTTCGCGTGCGCATCGC;AGCACAGCCCGGCGGCTCGG;CCACCAGCACCTCTGCCTCC	chr1	156646826;156646908;156646970	CGACAGCGTTAAGTTCCAGC;GATACCTGAGTCGTTGGGGC	CGACAGCGTTAAGTTCCAGC	GATACCTGAGTCGTTGGGGC
BCL10 (screen)	BCL10	screen	3	CAAGGGTGTCCAGACCTTTT;ACATCAAGTAGAAAAAGGGC;CAGCTATGATTTTCTCACAC	chr1	85270734;85270773;85270878	CAGCACTTCATCTGTAATCTTCTGT;AGAACATTGTCTCACACCAGCT	CAGCACTTCATCTGTAATCTTCTGT	AGAACATTGTCTCACACCAGCT
BCL3 (screen)	BCL3	screen	3	GTAATGTGGTGATCACAGCC;CATGGCGGTCCAGCGCCATG;CTCGCAGGCAGGTCGGGCTG	chr19	44757034;44757094;44757148	AGGCAGGACTAGAGAGCAGG;GTCATAATTGCGGGCCTCCA	AGGCAGGACTAGAGAGCAGG	GTCATAATTGCGGGCCTCCA
BIRC2 (screen)	BIRC2	screen	3	ATGCTGGATAACTGGAAACT;GAATCTGGTTTCAGCTAGTC;ACATTCATTATCTCCCACCT	chr11	102350136;102350213;102350279	TATTCAACTTTCCCCGCCGG;AGAGGGTTTGGAGAAAGGCTG	TATTCAACTTTCCCCGCCGG	AGAGGGTTTGGAGAAAGGCTG
BIRC3 (screen)	BIRC3	screen	3	ATGCTGGATAACTGGAAAAG;CTCTGAACGAATCTGCAGCT;AGAAGGAAAAGTAGGCTGAG	chr11	102324740;102324786;102324838	TGATGAAAAGCGCCAACACG;CCACTGTTTTCTGTACCCGGA	TGATGAAAAGCGCCAACACG	CCACTGTTTTCTGTACCCGGA
BLNK (screen)	BLNK	screen	3	CTCACCTATATACTCGCCTC;GTTTCCTGCTCTACTGGAGG;TCTGAGTCCGAGTGCTCATC	chr10	96227422;96227474;96227543	CACCCCGCAATCTTGGACA;GCTTCAAACCCCAGCTTTGC	CACCCCGCAATCTTGGACA	GCTTCAAACCCCAGCTTTGC
BTK (screen)	BTK	screen	3	TGAGTATGACTTTGAACGTG;AGGCGCTTCTTGAAGTTTAG;AGCTATGGCCGCAGTGATTC	chrX	101375149;101375216;101375272	GGACCTTTGACTTTCCGGCT;TAGCTAGGCTGAGGGGGAAC	GGACCTTTGACTTTCCGGCT	TAGCTAGGCTGAGGGGGAAC
CALCOCO2 (screen)	CALCOCO2	screen	3	ATCTTTGATGGTCTCCTCCA;GTGGAGAAGTTCTACATCCC;TCGACGAGGGATGAAATGCT	chr17	48841712;48841806;48841847	GCTTTTCCTGACTTGCTTTGC;CACAGAGAGTCACACAGTTAGGT	GCTTTTCCTGACTTGCTTTGC	CACAGAGAGTCACACAGTTAGGT
CALM1 (screen)	CALM1	screen	3	ATCTTTATCAAATAGGGAGA;CCTGCAATTCAGCTTCTGTT;AGCTTTAAAACCATGAATGA	chr14	90401277;90401359;90401425	CCCGGCAAGTGTGTATTGTG;CGCAAGGCCCATCATCTTCT	CCCGGCAAGTGTGTATTGTG	CGCAAGGCCCATCATCTTCT
CARD9 (screen)	CARD9	screen	3	CCAACCTGGTCATCCGCAAA;TCAGGACCTTGCACTGCCGC;TGACGAGTGCTGGAGCGTCC	chr9	136371908;136371975;136372042	ACTCTGTGGTTGGGTTTGGG;GCTGATCCCCCTCGATGC	ACTCTGTGGTTGGGTTTGGG	GCTGATCCCCCTCGATGC
CASP1 (screen)	CASP1	screen	3	AATTAATGTCAAGGAAGATG;GGAGTACTTTCTTCCTTTCC;CTTTTCATAGATCAAACATC	chr11	105033023;105033069;105033120	ATGTGGATAATGAAGCTGTGGAA;TGTCAGTCAGTCAGTCAGTGTT	ATGTGGATAATGAAGCTGTGGAA	TGTCAGTCAGTCAGTCAGTGTT
CASP2 (screen)	CASP2	screen	3	TGTAGGATATTGGGAGTGTG;GCTGTTTGGCTAGCACCACT;GATGAGCTCCCTCATTTCCA	chr7	143291552;143291600;143291671	TCATGCCTCTTCCACTCCACT;GCTCTATTCCCACCCCATGA	TCATGCCTCTTCCACTCCACT	GCTCTATTCCCACCCCATGA
CASP8 (screen)	CASP8	screen	3	CAGAAATCTTTATGATATTG;GCGGAATGTAGTCCAGGCTC;CCTCCAACATTCTCTTTTCC	chr2	201266515;201266564;201266636	GACAGCACAATGACCAGTACCT;GGAAGAGCAGCTCCTTCAGG	GACAGCACAATGACCAGTACCT	GGAAGAGCAGCTCCTTCAGG
CBLB (screen)	CBLB	screen	3	AAGACTCTTTAAAGAAGGCA;AGTACTCATTCTCACTGAGT;CGTAAATGCTGATATGTATC	chr3	105853451;105853531;105853593	AGCGACTCACATTTACCCCA;GACTGTGCCAAAATCCCAAACT	AGCGACTCACATTTACCCCA	GACTGTGCCAAAATCCCAAACT
CD14 (screen)	CD14	screen	3	CCTCTACTGCAGACACACAC;CGGAGAAGTTGCAGACGCAG;GTCGCAGAGACGTGCACCAG	chr5	140632832;140632883;140632942	GCCTTGACCGTGTCAGCATA;AAGCACTTCCAGAGCCTGTC	GCCTTGACCGTGTCAGCATA	AAGCACTTCCAGAGCCTGTC
CD180 (screen)	CD180	screen	3	CGAGATTGGATATTCCCGTT;TGGCAGAAACATCGCTTAAT;CTTCATGTATCCAGTTAATC	chr5	67184439;67184480;67184577	TCCAAGATACAAGCTTTCCAAGT;GATTGGCGTGTTCAGAAGTGA	TCCAAGATACAAGCTTTCCAAGT	GATTGGCGTGTTCAGAAGTGA
CD1C (screen)	CD1C	screen	3	TCCAGATCCCTTTGAAGTAC;GAGCCCAGAAGGCTTCTTTC;TGAGTAGATGACAGACACTT	chr1	158292096;158292150;158292238	ACTTCCTGATACAGCCCTAGGT;AGAGAAATCGGGGGCAAGTG	ACTTCCTGATACAGCCCTAGGT	AGAGAAATCGGGGGCAAGTG
CD1D (screen)	CD1D	screen	3	ACGAGATCTGGAGGCAGCGG;GCACAGCTGGAGCAACGACT;CTGGTCGCTGAACGTGCCCT	chr1	158181480;158181575;158181614	GTAGAAAACTCGCTGCTCCCT;AGCTGCTTCGATAAACCCGA	GTAGAAAACTCGCTGCTCCCT	AGCTGCTTCGATAAACCCGA
CD207 (screen)	CD207	screen	3	TAAAAAGAATAGTGACGGCA;CCAGTTGCTGAAAGGTCGTG;AATCCCAGATCCCCGGTTTA	chr2	70833910;70833961;70834012	GCACATAACCCAGGCTCTCA;GCCCATTGGACTGTCTTGGT	GCACATAACCCAGGCTCTCA	GCCCATTGGACTGTCTTGGT
CD209 (screen)	CD209	screen	3	CACAGCCAAAAGCCAGGCGT;TGGGCTCCTTGTCCAAGGTC;GTGTCTTGGCCATGGTCCCC	chr19	7746424;7746460;7746514	CCAAGGTCTTGGTTAATCCCCT;GGATTTAGACCAGGCTCTCCC	CCAAGGTCTTGGTTAATCCCCT	GGATTTAGACCAGGCTCTCCC
CD22 (screen)	CD22	screen	3	CCCAGGCGTAGAGGGTTTCA;GCTTTCCAGGTCACCATCTA;AAGACTCTATGAAAGCACAA	chr19	35332602;35332661;35332751	GCTCTCATGCCCCCTTAGTA;ACCACTGTCATTGAGGTGCA	GCTCTCATGCCCCCTTAGTA	ACCACTGTCATTGAGGTGCA
CD248 (screen)	CD248	screen	3	GTCGCCCCCCAGCTCGCGGC;AAGAGAGCGTAGCAGCTGCT;CGGCCGCCCAGGCCAGCAAC	chr11	66316874;66316932;66317011	GAAAGCCGTGTCCTGGTCC;CCTCCCCCTGTCAAGAGCTG	GAAAGCCGTGTCCTGGTCC	CCTCCCCCTGTCAAGAGCTG
CD274 (screen)	CD274	screen	3	TTGGTTGATTTTGTTGTATG;TCAGGCTGAGGGCTACCCCA;TCTCTTGGAATTGGTGGTGG	chr9	5462840;5462921;5462981	GCAGAGCTAGCAGGTGTTCC;TGTTGTGTTGATTCTCAGTGTGC	GCAGAGCTAGCAGGTGTTCC	TGTTGTGTTGATTCTCAGTGTGC
CD276 (screen)	CD276	screen	3	CTCACAGGAAGATGCTGCGT;GCACTGTGGTTCTGCCTCAC;GGGACAGTGATTGTGGCAGT	chr15	73699646;73699714;73699767	CTTGCGTCCTCTTTCTCCCA;ACAGGTGGAAGTAAGGTATGGC	CTTGCGTCCTCTTTCTCCCA	ACAGGTGGAAGTAAGGTATGGC
CD300A (screen)	CD300A	screen	3	GACACCTGCAAGTATCACTG;GGTGGCACCCACTGCAAACA;AGGGCCCCCTCCATGTCTCA	chr17	74474562;74474622;74474706	GGGTCTGACTTGTGGTTTTGC;CCGGGGTGTTCAGACTATGG	GGGTCTGACTTGTGGTTTTGC	CCGGGGTGTTCAGACTATGG
CD300C (screen)	CD300C	screen	3	CTGGAGTAGCGGTCATAGAG;CCCACTCACCTGGGACAAGC;TGTTACAGGAATGACTGCCA	chr17	74545636;74545730;74545776	CAGTCACAGCATCACCTCCC;AAGCAGAAGCGAAGCTCAGA	CAGTCACAGCATCACCTCCC	AAGCAGAAGCGAAGCTCAGA
CD300E (screen)	CD300E	screen	3	CACGTCATGTGAGAGCATTG;TCAGTATGAGAGCATGTACA;TGTTTGTCTCTGAAGGGCCC	chr17	74617325;74617382;74617447	GCGTGACCATGAATCCAGGA;TCTGGATGGAGACTTGGGACT	GCGTGACCATGAATCCAGGA	TCTGGATGGAGACTTGGGACT
CD300LB (screen)	CD300LB	screen	3	GAGTGACCGTGTGTCCATCA;ATGTATCCCAGCGCACCCCT;GTTCAATGCCACTATAAGCA	chr17	74525886;74525963;74526002	TGAGTCCCAAGGTCAGGTCC;CAGGGGTTCGTGCCGG	TGAGTCCCAAGGTCAGGTCC	CAGGGGTTCGTGCCGG
CD300LF (screen)	CD300LF	screen	3	CTGACCCACTGGTTTTAACA;TACTTGAAGTGGTGGTGTCG;ACCGGTGATTTGAGTGACAA	chr17	74704663;74704699;74704805	ACGTGCGGTTTTTCTGATTGT;GTTTTGTCTGCGGAAGGTGT	ACGTGCGGTTTTTCTGATTGT	GTTTTGTCTGCGGAAGGTGT
CD302 (screen)	CD302	screen	3	TGTGAAGTTTCTTCTGTGGA;CTAAATCCTCATCATCATCT;TGACAGATGCGAGTTTCAAG	chr2	159780031;159780118;159780168	CAGTCCTACTTTCTCTGCCCC;TCCTACACCCTTTTTGGCTTGA	CAGTCCTACTTTCTCTGCCCC	TCCTACACCCTTTTTGGCTTGA
CD33 (screen)	CD33	screen	3	CCTCACTAGACTTGACCCAC;AGCAGGTCAGGTTTTTGGAG;CCGAGGAGTGAGTAGTCCTG	chr19	51225811;51225858;51225954	GTTGATCTTCTCTCAGGCCCT;TCCAGCGAACTTCACCTGAC	GTTGATCTTCTCTCAGGCCCT	TCCAGCGAACTTCACCTGAC
CD48 (screen)	CD48	screen	3	TCTGACCCTGCCTTTAAATT;CTGGTCGAAAGTATAAAACC;TCACTTGGTACATATGACCG	chr1	160685031;160685097;160685172	TGGGGATTTGCTCTTTGGCT;GCGCAGGTCTCACTCTGAAT	TGGGGATTTGCTCTTTGGCT	GCGCAGGTCTCACTCTGAAT
CD69 (screen)	CD69	screen	3	ATGTTCAGAACAAGCATTTT;AGGACTGGGTTGGCTACCAG;ATTGGCCTGGACAATTGTAT	chr12	9755118;9755173;9755252	AGAAACGGAAGGAAAGCACTGA;TGCATGCTGTGGGTATTTGG	AGAAACGGAAGGAAAGCACTGA	TGCATGCTGTGGGTATTTGG
CD72 (screen)	CD72	screen	3	TCTCTTCTCTCTAGACCCAG;CCCCCTTACCCTGTCCTAAC;TGCAGATCTGAGGTTTGTGA	chr9	35618119;35618230;35618267	GCTCTCCAGACCTGCTTTGT;CTAAGCCGTGCAGTCACAGA	GCTCTCCAGACCTGCTTTGT	CTAAGCCGTGCAGTCACAGA
CD83 (screen)	CD83	screen	3	AGAGAGGATGGAGACACCCC;CTTTCGACGCCCCCAATGAA;GTATGTCCCCGAGTTGCAGC	chr6	14131554;14131625;14131665	GGTGTCGAGTTGGAGTGCTT;GTCACCTCACCTGTCACTCTC	GGTGTCGAGTTGGAGTGCTT	GTCACCTCACCTGTCACTCTC
CD93 (screen)	CD93	screen	3	GGCACTTGCCCTTCTCTCGC;GAGGCGGGAGGCAGCCCTGA;TGGCCAGGTTGCCCCCGTTC	chr20	23085897;23085937;23086026	TGCCAGTTAGAGTAAGGCGTG;ATAGAAGCTCCTGTCGCCGC	TGCCAGTTAGAGTAAGGCGTG	ATAGAAGCTCCTGTCGCCGC
CDC42 (screen)	CDC42	screen	2	TTTCTTTTTTCTAGGGCAAG;ATTTGAAAACGTGAAAGAAA	chr1	22086442;22086544	TGCTTTTTGAGTAATGACCAGCA;AGTTATCTCAGGCACCCACT	TGCTTTTTGAGTAATGACCAGCA	AGTTATCTCAGGCACCCACT
CEBPB (screen)	CEBPB	screen	3	TCATGCAACGCCTGGTGGCC;GCCGCCTGCCTTTAAATCCA;TGCTTGGCTGCTGCGTACGG	chr20	50191049;50191101;50191153	CAGCCCCCTCACTAATAGCG;GTACGGGCTGAAGTCGATGG	CAGCCCCCTCACTAATAGCG	GTACGGGCTGAAGTCGATGG
CHID1 (screen)	CHID1	screen	3	GAGGTGACTGTACTGGCTGA;TTTTGGCATCTGACTTTGAC;GGACACTCTTCAACCTCCTC	chr11	904668;904752;904796	GCTCATCAGGTGCCTTTGTG;GCCGGTTGTTTGAATGTGCT	GCTCATCAGGTGCCTTTGTG	GCCGGTTGTTTGAATGTGCT
CHODL (screen)	CHODL	screen	3	GCTGGACAGTTCATGGAAGT;TCTGTTCTGCTTCATTCTCA;CCATCAGAAATCCCTGTCCC	chr21	18256563;18256645;18256703	TTCAGGCCAAAAGGTGTGTT;GCCCATCTCCATTCCTCCAA	TTCAGGCCAAAAGGTGTGTT	GCCCATCTCCATTCCTCCAA
CHUK (screen)	CHUK	screen	3	CGCCCCGCCTCACCCGATGC;ATGCGGGAGCGGCTGGGCAC;CCGCCCCATGGAGCGGCCCC	chr10	100229432;100229468;100229523	TTCCACAGACGCTCAAACCC;GGGGACTTAAAGAGCGGACC	TTCCACAGACGCTCAAACCC	GGGGACTTAAAGAGCGGACC
CLC (screen)	CLC	screen	3	AAATTCTTGGCCATCCTGAA;CACGACGACCAAAGCACACT;CAGGAATGAACCATATCTGC	chr19	39734336;39734419;39734480	TGGAGTTAGGGCATGAAGAGC;CCACAAGAAAGGGACCTGCT	TGGAGTTAGGGCATGAAGAGC	CCACAAGAAAGGGACCTGCT
CLEC10A (screen)	CLEC10A	screen	3	GTTTGGATGGGGCTCTGGGC;CTTCACCTCAAACACTGTGG;GTTTAGATTCCAAATTTCAG	chr17	7076866;7076922;7076977	CCGTTCCTGCTTGAAACCCT;GCAATGCTTATGGAGGGCCC	CCGTTCCTGCTTGAAACCCT	GCAATGCTTATGGAGGGCCC
CLEC11A (screen)	CLEC11A	screen	3	CCAGCTTAATGCAGGCAGCC;GGGCTTTGGCCATGGGGCTC;GAGGTGCCCAGGAGGAGGAG	chr19	50723535;50723590;50723643	CCGGACAGAGACGAGGAGA;AACCTTGCAATACCCCCTCC	CCGGACAGAGACGAGGAGA	AACCTTGCAATACCCCCTCC
CLEC12A (screen)	CLEC12A	screen	3	GTAAGCCTTGTCCAAGGAGA;TGATGATGTCCAAACATGGC;GTTGTTTATCTTCAACAGGC	chr12	9980608;9980663;9980705	TGTCACACAGAGAGGAAAGGAA;TCAGTCACTTCACACCCCAAC	TGTCACACAGAGAGGAAAGGAA	TCAGTCACTTCACACCCCAAC
CLEC12B (screen)	CLEC12B	screen	3	CTACGCGACACTCACATTTC;AACTCCTACCTCTTTTTCTT;TGAGGTGCCAGCTTTAATAC	chr12	10010794;10010843;10010927	CCAGCCTTGAAAAACACATGC;AGCCACATATTTTCACTTCAACCT	CCAGCCTTGAAAAACACATGC	AGCCACATATTTTCACTTCAACCT
CLEC14A (screen)	CLEC14A	screen	3	GGCCTGCATCCTGCGAGGTG;TGCCGACCGTGCTGGCTGCT;CGCCCTGTGCCTCCTCTGGC	chr14	38255851;38255932;38255992	CCAGAACAGCAGGTCTTTGGA;TCCTCGAGCGGGACAGATC	CCAGAACAGCAGGTCTTTGGA	TCCTCGAGCGGGACAGATC
CLEC16A (screen)	CLEC16A	screen	3	GGGTAAACTGAGTGATCTGG;GGAACTCACAGTTGATGATC;GTGAGTACACGTAGAGGGGC	chr16	10977254;10977303;10977366	TCAAAGGCTCCTAGTGTTGGC;GATTTGCAATGCTCAGCCCC	TCAAAGGCTCCTAGTGTTGGC	GATTTGCAATGCTCAGCCCC
CLEC17A (screen)	CLEC17A	screen	3	CAGACCTCTGATTGAGCCAG;AAGTCACCACCAGCAGACAC;GCCCTACTCACACTTAATCA	chr19	14596892;14596952;14597008	TCCTTACTCTCTGAAGCCCCA;TCCAAATTGAGCCCAGGTCC	TCCTTACTCTCTGAAGCCCCA	TCCAAATTGAGCCCAGGTCC
CLEC18A (screen)	CLEC18A	screen	1	GACAAAGGACACCAAGCCCG	chr16	69954464	GGATGCTCAGAGATGGCAGG;GTATCTGGGAGCTGGCACAC	GGATGCTCAGAGATGGCAGG	GTATCTGGGAGCTGGCACAC
CLEC18B (screen)	CLEC18B	screen	1	CAGGCTGACCACTTCAACAA	chr16	74418154	CTGAGATGGCCCAGTGGAAG;CCTCTGTGGAATCCCAACCC	CTGAGATGGCCCAGTGGAAG	CCTCTGTGGAATCCCAACCC
CLEC18C (screen)	CLEC18C	screen	1	TAGGCTGACCACTTCAACAA	chr16	70177386	AGAGATGGCAGGGGAGTTGA;AGCCTCTTCTGAGATGGACC	AGAGATGGCAGGGGAGTTGA	AGCCTCTTCTGAGATGGACC
CLEC19A (screen)	CLEC19A	screen	3	CAGAACAGGGGGCACAGGGA;CTACTGTTCTGAGTTCTCTG;GGATCCCACTTACCTGTGGA	chr16	19298699;19298799;19298835	CCAACCTTCCTCCCAGTCTG;TTGGGAGTCTAAGGGGGAGAAT	CCAACCTTCCTCCCAGTCTG	TTGGGAGTCTAAGGGGGAGAAT
CLEC1A (screen)	CLEC1A	screen	3	AGACAGGGTACCTGTGCGCC;TTGAGAATGCAGGCTCATGG;AGGCCAAGTACAGCAGCACG	chr12	10098814;10098865;10098902	GTCACAGGGCGAGTAATTGGA;GCCTTTTAGTGCCTTGCTTCC	GTCACAGGGCGAGTAATTGGA	GCCTTTTAGTGCCTTGCTTCC
CLEC1B (screen)	CLEC1B	screen	3	GATTGACAACCGGAACATTG;TCTTCAGGCACAACTTAACA;GCAGCCCCTGTGACACAAAC	chr12	9996851;9996921;9996972	TACATTTGAGGTTTCTCTTCCTTGC;TAAAACAATCAGAACTAAAGGGCAC	TACATTTGAGGTTTCTCTTCCTTGC	TAAAACAATCAGAACTAAAGGGCAC
CLEC20A (screen)	CLEC20A	screen	3	TGAGGGAGTAGAGCTTCCAC;ACGACGCCCAGCAGCACTGC;TCTTACTGCTCACCAGCTGC	chr1	178494684;178494734;178494804	AGAAGTGCTTGCGTCGAAGA;GCCGGCTCTTCAAGAACAAG	AGAAGTGCTTGCGTCGAAGA	GCCGGCTCTTCAAGAACAAG
CLEC2A (screen)	CLEC2A	screen	3	GATTGATACACAAGAAGACA;TTTCTGATGATACCAGAAAT;TGCCACAGGTTTAGCATGCT	chr12	9922071;9922141;9922218	ACCCACACAGTTCAAACCCA;CTCAAACTGTGGAAGCAAAAAGT	ACCCACACAGTTCAAACCCA	CTCAAACTGTGGAAGCAAAAAGT
CLEC2B (screen)	CLEC2B	screen	3	CTATGTTGTCAATTATAGTT;TCTCTAAAGAAGAAGGAGAT;AGAGTTTATGCCCCTATGAT	chr12	9857499;9857549;9857600	GCTCCGACTCAAGAAAATTCACA;GGAAGGCCTACGTATCACTGA	GCTCCGACTCAAGAAAATTCACA	GGAAGGCCTACGTATCACTGA
CLEC2D (screen)	CLEC2D	screen	3	GCAGCTTGAAGACATACTGA;AGAACTGGACATCAAGTCAG;GGTTGAAAGCTTCCAGGAAC	chr12	9687934;9688027;9688082	AGTTTGAATCTCAGTTTTGCCATTT;CCTTGTAGGGCTGAATCTTTGA	AGTTTGAATCTCAGTTTTGCCATTT	CCTTGTAGGGCTGAATCTTTGA
CLEC2L (screen)	CLEC2L	screen	3	TTCGCACTTGATGCAGCCCT;GAAGTGCTACTTCTTTTCCG;CCAGCACCGCCTCGTGGGTG	chr7	139540330;139540399;139540445	GGAGCCACAGAAAGCAGAGT;TTTGGAGACGTGTCACAGGG	GGAGCCACAGAAAGCAGAGT	TTTGGAGACGTGTCACAGGG
CLEC3A (screen)	CLEC3A	screen	3	GGCTGGCAACATGGCTCAGC;CCAGGAGTAAGGTGATCACC;TCGACGTTTGCTGTGCTTCC	chr16	78022607;78022662;78022718	ATTCCAGCCAACCTCCGAAG;TAACATTGTCCAGCACCTCCC	ATTCCAGCCAACCTCCGAAG	TAACATTGTCCAGCACCTCCC
CLEC3B (screen)	CLEC3B	screen	3	CCACTCCCAGTCTGCCTGAA;CTCGTGGAAGGTCTTCGTCT;TCGTTCTCCGAGCCAGTCTG	chr3	45035531;45035578;45035643	CATCAGGACCCCTTTTGCCT;CCATGTCGTTGAGGCCCAG	CATCAGGACCCCTTTTGCCT	CCATGTCGTTGAGGCCCAG
CLEC4A (screen)	CLEC4A	screen	3	TTCCCAATACAGAGACAGCC;TTTCTACTGAATCAGCATCT;GATAAACACTCAAGAAGAGC	chr12	8135590;8135662;8135732	GGCTCCTGGTTGCATCTGAG;CCACAGCGCAAATATCCCAA	GGCTCCTGGTTGCATCTGAG	CCACAGCGCAAATATCCCAA
CLEC4C (screen)	CLEC4C	screen	3	TCTGGTGGTGATCAACACCA;TTTCTACTGGGATGCAATCT;GGAGCTGCTGCCCAACCCCT	chr12	7737443;7737504;7737555	CTTTCAGGGCAATAAAAAGACTCTT;ACCAGTAAATGAGTTCAGCTTTGG	CTTTCAGGGCAATAAAAAGACTCTT	ACCAGTAAATGAGTTCAGCTTTGG
CLEC4D (screen)	CLEC4D	screen	3	TTTTCACTTGAGGGAGCACC;CACGTCTTGTTGTCAGTAAG;CCATCTGATGACCATCAGCA	chr12	8519014;8519074;8519144	TCAGGATCTTTTGGTAGGAGAACA;CAGACAGAGGCATAACAGGACA	TCAGGATCTTTTGGTAGGAGAACA	CAGACAGAGGCATAACAGGACA
CLEC4E (screen)	CLEC4E	screen	3	CCTGTGAGTTGATAACCACC;TTTCTACTGACACCATTTCC;AGAATTGTTGTCCATTGAAC	chr12	8537140;8537190;8537241	GGTAGGCAGTGACTTTACCGA;ATTCGGTTCACCTGGGACAC	GGTAGGCAGTGACTTTACCGA	ATTCGGTTCACCTGGGACAC
CLEC4F (screen)	CLEC4F	screen	3	CCAGGTGCTCGGTGATCATC;AGGCACTGGAATTCTCCATG;AGATCATCACCACTTTGGCA	chr2	70816960;70817049;70817098	GGTCTTCCTTGAGCCTCTGG;TGCAGTACCCATTTCCCTTGG	GGTCTTCCTTGAGCCTCTGG	TGCAGTACCCATTTCCCTTGG
CLEC4G (screen)	CLEC4G	screen	3	GCCAAGGTCCAGGAGTGACA;CCCCGTCTCGCTCACTGTTC;GACGTCCTCACGGCCCCTGC	chr19	7730298;7730353;7730414	CCACGTCGTCTTTGGCACA;CAGCCATAATCCCCGCTCC	CCACGTCGTCTTTGGCACA	CAGCCATAATCCCCGCTCC
CLEC4M (screen)	CLEC4M	screen	3	GGTGCAGCAGCTGGGCCTCC;GAAGAAGATCCAACAACCAG;TCTTGTGGCCATGTATCTGC	chr19	7763307;7763409;7763451	GGGACAGCGGGAAAACATGA;AGTTCAGATCCCTACCCCGT	GGGACAGCGGGAAAACATGA	AGTTCAGATCCCTACCCCGT
CLEC5A (screen)	CLEC5A	screen	3	TGTCAACACGCCAGAGAAAC;TATCCACTTCTGAATCATCT;CTTCAGTCTGCCCCAAAGAC	chr7	141935819;141935889;141935940	CAGTTTTTCAGCCAGCCACC;GCAGGATTCATAACCCAAACCA	CAGTTTTTCAGCCAGCCACC	GCAGGATTCATAACCCAAACCA
CLEC6A (screen)	CLEC6A	screen	3	AGAAGCTGGGCAACATCCCC;AGACCAAACCTTCTCTTCAC;GTTCAACACAGAAGCAGAGC	chr12	8465490;8465547;8465625	ATTGGGAGAAATTCTGCAGGTA;GAGATCTGTTACCCAGTAATGTGA	ATTGGGAGAAATTCTGCAGGTA	GAGATCTGTTACCCAGTAATGTGA
CLEC7A (screen)	CLEC7A	screen	3	CAAGCCCTTAAAAGAGTGCC;AATACTCACCCATGGTACCC;ATTACAGCAATGAGGCGCCA	chr12	10127684;10127755;10127820	GGCATTAACAGCACCAACCC;CCCACCATCCGTCATTCTCT	GGCATTAACAGCACCAACCC	CCCACCATCCGTCATTCTCT
CLEC9A (screen)	CLEC9A	screen	3	TGGACAAGGACTGCTGTTAT;TCTCTGAAATTTGGAGCATT;GCTCTCTATTTGTAGCAGCG	chr12	10063061;10063132;10063178	ACATCATGTGGACCATTACGTT;CAGAATAACATGAGACCACAAAACA	ACATCATGTGGACCATTACGTT	CAGAATAACATGAGACCACAAAACA
CLECL1 (screen)	CLECL1	screen	3	ACAAATGATGTCCCACTGAA;ATTTCCTTCTGCTCCCCAAG;GTGTTCAGTCTTACTAATCA	chr12	9733076;9733149;9733210	CGAACAGTTTTGATGTCAGCGT;GCCTGAACTAAAAGAGGAAGTGG	CGAACAGTTTTGATGTCAGCGT	GCCTGAACTAAAAGAGGAAGTGG
COLEC10 (screen)	COLEC10	screen	3	TGAGGAACCACAGCAATGAA;TTTGCAAAAGAAATAGTACC;GTGGCACAGACTTCAGCGGT	chr8	119067284;119067332;119067387	GGGTATGCTTCCTTCCTGTCT;AGGGGTTCAGAGATGAGGGA	GGGTATGCTTCCTTCCTGTCT	AGGGGTTCAGAGATGAGGGA
COLEC11 (screen)	COLEC11	screen	3	CCTTACCCCACAGCTGTCGC;GCTTCTCCTCCTTCACCAGC;GCATGCTCAGCGTGCCCCCG	chr2	3643731;3643770;3643824	AGAATGGTATGTGGCTCCCG;TTCTCCAGGTCGTTGATGCC	AGAATGGTATGTGGCTCCCG	TTCTCCAGGTCGTTGATGCC
COLEC12 (screen)	COLEC12	screen	3	CATAGCCATTATACGCCTGG;GAGTCAATTGAAAGAAACTT;CAGCGTATCCTTGTTCTTGC	chr18	347107;347156;347231	CTCCTTCAGCCAATCCGTGT;ATCTCCGTCAGCAACTTCGT	CTCCTTCAGCCAATCCGTGT	ATCTCCGTCAGCAACTTCGT
CREB1 (screen)	CREB1	screen	3	GATGATGTTGCATGAGCTGC;GGGCAGACAGTTCAAGTCCA;ACCTGAACTGTTTGGACTTG	chr2	207560241;207560309;207560358	ACTGCCAAAGAGTGTCTGGG;ACTAGTGAAAGGAGAGAGATATGGC	ACTGCCAAAGAGTGTCTGGG	ACTAGTGAAAGGAGAGAGATATGGC
CRX (screen)	CRX	screen	3	AGTGTCCCCGAAGATCATGA;GTCAACGCCTTGGCCCTAAG;ACGACTGTACTCACTTGGGT	chr19	47834445;47834497;47834541	CCCCATGGTGAGTAACTGGT;TGATTGCCTTCTTCCTGGGG	CCCCATGGTGAGTAACTGGT	TGATTGCCTTCTTCCTGGGG
DDX3X (screen)	DDX3X	screen	3	CTGTTCAGGTTTGATGATCG;CGTGGTGACAGAAGTGGCTT;GTTCCAAGCGTTCACTTGGT	chrX	41342504;41342555;41342636	TCTGTGAGGCCTTTTAGGCTATAC;TAGCTAGTAAGGCTTCATCACAAGT	TCTGTGAGGCCTTTTAGGCTATAC	TAGCTAGTAAGGCTTCATCACAAGT
DDX58 (screen)	DDX58	screen	3	CTTGTGAACAACCTTAAAAA;TCTCAACAATCTGTTCCACT;TTTCCCAGGTATAGAGTTAC	chr9	32488090;32488156;32488195	GGCCTGAAGATCCTCCAAGTT;AGCATTTCATCTTTGTGGTTCCT	GGCCTGAAGATCCTCCAAGTT	AGCATTTCATCTTTGTGGTTCCT
DGCR2 (screen)	DGCR2	screen	3	TGGGGTCCTTGCGGTACTGT;GGCATGGGTCGTCCCCCTTA;TCAAACATGTGTTGACATCA	chr22	19048490;19048583;19048626	ACTGAGGAAGCAAAGGGACG;ACAGGTAGCATTCACAGGCC	ACTGAGGAAGCAAAGGGACG	ACAGGTAGCATTCACAGGCC
DHX58 (screen)	DHX58	screen	3	CTCCACGTGCTCCTCCTCCT;GCAGGTCATGGCACCGGGCC;GAGTTCAGGCGCATGCTGGA	chr17	42111320;42111385;42111454	CCCAACACCTTGACTCCAGG;GCCCCAGATTCAGCTCTCTT	CCCAACACCTTGACTCCAGG	GCCCCAGATTCAGCTCTCTT
ECSIT (screen)	ECSIT	screen	3	GGTAGTGGACGAAGATGCGC;GCTGCTCAACATCTTCCCCA;CTGCGCAAGATGCGGGAGTA	chr19	11513872;11513909;11513962	GCCTCACCGTGGTTCTCC;CCCATAGCTCTGAACAGTCCC	GCCTCACCGTGGTTCTCC	CCCATAGCTCTGAACAGTCCC
F13B (screen)	F13B	screen	3	TTCTTGTCTTCCACTTTCAG;TTTTAAAAGTATAGTAATAT;CTCATTTCAGAGAAACCCTG	chr1	197062926;197063009;197063051	TTACTGAAGCACCTTGGCTCT;AAAGGACTGCTTGAGTTGTCAC	TTACTGAAGCACCTTGGCTCT	AAAGGACTGCTTGAGTTGTCAC
FADD (screen)	FADD	screen	3	CCCCGCCATGGACCCGTTCC;CGGTCAGCTCGCTGCTCGAC;AAGCTGGAGCGCGTGCAGAG	chr11	70203470;70203507;70203579	CGGGTCCCTTAGTTTTCGCG;CGGGCTCCAGGTCGTTCT	CGGGTCCCTTAGTTTTCGCG	CGGGCTCCAGGTCGTTCT
FCER1A (screen)	FCER1A	screen	3	GCCATTGTGGAACCATTTGG;AATGCCAAATTTGAAGACAG;GTGTACCTGGAAGTCTTCAG	chr1	159304039;159304112;159304178	GTCTCCTTGAACCCTCCATGG;TGAGAGGCCTTGAATCCCAC	GTCTCCTTGAACCCTCCATGG	TGAGAGGCCTTGAATCCCAC
FCER1G (screen)	FCER1G	screen	3	TCTATCCCCTCAGCGGCCCT;GGACAATTCCATACAGAAAC;GTGGGAGGAGGGCAGCAGCA	chr1	161217990;161218035;161218134	AGAGCCCCTTCCCTTCTCTC;ATCCCCCTTCCCTCCAAACT	AGAGCCCCTTCCCTTCTCTC	ATCCCCCTTCCCTCCAAACT
FCER2 (screen)	FCER2	screen	3	TGGGGGTGTCCTCACGCCAC;GGACTCAGATCGTGCTGCTG;TCCACCCCCGGCAGAGATCG	chr19	7698743;7698799;7698852	TGGGTTTTGAGAGGATGCGT;GGAAGCTGTGCAAATGGAGC	TGGGTTTTGAGAGGATGCGT	GGAAGCTGTGCAAATGGAGC
FCGR1A (screen)	FCGR1A	screen	1	GGAATATCTGTCACTGTGAA	chr1	149788613	GCGTGGAAGGATAAGCTGGT;AGCCCGGTTTCTTCACTTGT	GCGTGGAAGGATAAGCTGGT	AGCCCGGTTTCTTCACTTGT
FCN1 (screen)	FCN1	screen	3	ACACCCGAGTGTCAGTGAGT;CTGGACATGTGTCCGCAGCC;CCAGAGAGCATGGAGCTGAG	chr9	134917718;134917786;134917864	TGTTGGGCATCTTCACAGGA;GCAACTAAGCAGCCCATAGG	TGTTGGGCATCTTCACAGGA	GCAACTAAGCAGCCCATAGG
FCN2 (screen)	FCN2	screen	3	AAGACCAGAAGAGATGGAGC;GCTGCTCTCTTTCCTGGGCA;TGGAGTGCCCTTACCTGGAC	chr9	134880826;134880883;134880919	ATGACAGTCGCCATGGGATC;GAAGCCACCAATCACGAAGC	ATGACAGTCGCCATGGGATC	GAAGCCACCAATCACGAAGC
FCN3 (screen)	FCN3	screen	3	CACCAGCCAGCCGCCCCCCT;ATCTGTGCCTACCTGAGGGC;TCCCAGGCCCCAGAAACTGC	chr1	27373150;27373190;27373253	CCATTGGGGGCTCACTAAACA;GGTCCCACACTTGTTCCAGT	CCATTGGGGGCTCACTAAACA	GGTCCCACACTTGTTCCAGT
FREM1 (screen)	FREM1	screen	3	TTGCAGGCATCTTTCTCTTT;CGGTTGATGCTGATGAAGGT;CATGAACTCTCTGAGTTGGG	chr9	14868819;14868906;14868962	TTTGATGGCTTGAGGGGAGAC;TAAAGGGATTTCGCCGGTGG	TTTGATGGCTTGAGGGGAGAC	TAAAGGGATTTCGCCGGTGG
HAVCR2 (screen)	HAVCR2	screen	3	AATGTGGCAACGTGGTGCTC;GGTGTAGAAGCAGGGCAGAT;CTATGCAGGGTCCTCAGAAG	chr5	157106820;157106915;157106954	GATCCGGCAGCAGTAGATCC;GTAACCTCACTCACCGCTTGA	GATCCGGCAGCAGTAGATCC	GTAACCTCACTCACCGCTTGA
HMGB1 (screen)	HMGB1	screen	1	GATACTCACGGAGGCCTCTT	chr13	30463215	GGAGATACACTGGGCAAAGGA;TATGGCAAAAGCGGACAAGG	GGAGATACACTGGGCAAAGGA	TATGGCAAAAGCGGACAAGG
IFIH1 (screen)	IFIH1	screen	3	AAGGTCAGGTAGTCCAGCAC;TCATCTCGTGCTTCAGGGCC;TGAGAAAGAAAGATGTCGAA	chr2	162318215;162318251;162318303	CGAATTCCCGAGTCCAACCA;CACGCACATTTCACCTGTCC	CGAATTCCCGAGTCCAACCA	CACGCACATTTCACCTGTCC
IGSF6 (screen)	IGSF6	screen	3	CCGTCCAAGCACAGGTTCTC;TGGTTGCTCAGAAGGGCATC;TAGTCCACTTCTAGGTACCA	chr16	21647332;21647388;21647452	TCCTGTCTGTTTAGCTCTCGC;GCAGGCCCATTAACCCACTC	TCCTGTCTGTTTAGCTCTCGC	GCAGGCCCATTAACCCACTC
IKBKG (screen)	IKBKG	screen	3	ATCTGCTGCCGGGCCACCAC;GCTGCACCTGCCTTCAGAAC;GAGGAGAATCAAGAGCTCCG	chrX	154552055;154552133;154552185	TGCCTTTCTCTTTCAGCCCT;CCTCCCCGCTAATCTGCATC	TGCCTTTCTCTTTCAGCCCT	CCTCCCCGCTAATCTGCATC
IL10 (screen)	IL10	screen	3	CGGAGATCTCGAAGCATGTT;TCAGACTGGGTGCCCTGGCC;CTCAGCACTGCTCTGTTGCC	chr1	206772319;206772373;206772411	GGGAATAGGTGTTGGGGATGG;AGGTCTACACATCAGGGGCT	GGGAATAGGTGTTGGGGATGG	AGGTCTACACATCAGGGGCT
IL1B (screen)	IL1B	screen	3	CATTCTCCTGGAAGGTCTGT;CATGGCCACAACAACTGACG;CTCTCCGCAGTGCTCCTTCC	chr2	112833427;112833479;112833569	TGGGGGAATTGAGTTGGCTG;GCTCGGGATTCTTTCAAGCC	TGGGGGAATTGAGTTGGCTG	GCTCGGGATTCTTTCAAGCC
IL1RL1 (screen)	IL1RL1	screen	3	TTTCTTATTTCAGAATTGTC;AATGTGATGACTGAGGACGC;ACCCTTGACCGTGAAGGACC	chr2	102340670;102340743;102340814	AGATTGCACCACTCACTCCA;GCTGTTCCCACTTCGACTTC	AGATTGCACCACTCACTCCA	GCTGTTCCCACTTCGACTTC
IRAK1 (screen)	IRAK1	screen	3	CTGTGATGATGTCCCGCGCA;ACGGGCGTTGCGGTTGATCC;CGCACAGCCGCAGCTCGGTC	chrX	154019451;154019515;154019574	GATGGCAACTTCCGGGGG;ACAAAGTGATGGACGCCCT	GATGGCAACTTCCGGGGG	ACAAAGTGATGGACGCCCT
IRAK3 (screen)	IRAK3	screen	3	GGCCCCACAGTTCCCCGCCA;GACCTGCCGCCCGCGCTGCT;GACGGCGCGCTGGGCTGGCG	chr12	66189304;66189371;66189422	GGATTTCCGCGGTTGTGTAA;CCAGGGAGTCTCTGCATCC	GGATTTCCGCGGTTGTGTAA	CCAGGGAGTCTCTGCATCC
IRAK4 (screen)	IRAK4	screen	3	CACATATGTTGATGGTGTTA;GATTTTATTGATCCTCAAGA;GATACAATCAGTTTCACATA	chr12	43768128;43768198;43768268	TGACTTGACTTTGGAATGTTTCTT;ACCTACTACCAATGTCTCCTCCA	TGACTTGACTTTGGAATGTTTCTT	ACCTACTACCAATGTCTCCTCCA
IRF1 (screen)	IRF1	screen	3	TGGTGAGAGGTGGAAGCATC;GAACTCCCTGCCAGATATCG;TCTAGGCCGATACAAAGCAG	chr5	132486986;132487047;132487119	AGCTGACCTCCTTCTACCCT;AGAGTGTCACCGGGAGTACC	AGCTGACCTCCTTCTACCCT	AGAGTGTCACCGGGAGTACC
IRF3 (screen)	IRF3	screen	3	CCGCTTCAGTGGGTTCTCAG;GTCCAAGCTGGGGCTCCGCA;GGGGGTCCCGGATCTGGGAG	chr19	49662461;49662512;49662570	CCGGTAGAAGGCTGTCACC;CCTGGTCCATATGAAGTCTCCA	CCGGTAGAAGGCTGTCACC	CCTGGTCCATATGAAGTCTCCA
IRF7 (screen)	IRF7	screen	3	CACCTTGAAGATGCGCGCGT;AGGGCACGCGGAAACAGGTG;ACTCTCCGAACAGCACGCGT	chr11	615111;615167;615248	TTATCCCGCAGCATCACGAA;AGCCGGCCCTGACTCTC	TTATCCCGCAGCATCACGAA	AGCCGGCCCTGACTCTC
JUN (screen)	JUN	screen	3	TCAGGGTCATGCTCTGTTTC;GCTCTCGGACGGGAGGAACG;CTGTTCTATGACTGCAAAGA	chr1	58782967;58783019;58783061	CCCGTTGCTGGACTGGATTA;CGTGCGCTCTTAGAGAAACT	CCCGTTGCTGGACTGGATTA	CGTGCGCTCTTAGAGAAACT
KCNV1 (screen)	KCNV1	screen	3	GACTGCTTCACGGTCAACGT;TGCAGAAGACACTAGAGTCC;GTCCAGCAGCGCTCTGCCGC	chr8	109974258;109974324;109974376	ATCGTCGCAAAGCTCCAGAG;GCGTGTCCCCAACTTTGTG	ATCGTCGCAAAGCTCCAGAG	GCGTGTCCCCAACTTTGTG
KLRB1 (screen)	KLRB1	screen	3	CCTTATCTCGAATAAGCAGC;TTTCTCACACTGTCAACCCT;ATTGGGCAGTTTAAGAGACC	chr12	9598524;9598574;9598643	TGCATAAAACCCCTGGGCTAAT;TGAACAGTAGGTCTCAAAAATCTCA	TGCATAAAACCCCTGGGCTAAT	TGAACAGTAGGTCTCAAAAATCTCA
KLRC1 (screen)	KLRC1	screen	3	AAGCTTCTCAGGATTTTCAA;AGGCAGCAACGAAAACCTAA;ACTGCAGAGATGGATAACCA	chr12	10451001;10451086;10451149	TGTACCCCAAGCTGCACATC;AGCTCCAATACTCGTTCTCCAC	TGTACCCCAAGCTGCACATC	AGCTCCAATACTCGTTCTCCAC
KLRC2 (screen)	KLRC2	screen	1	ATCCCTTGATGATTCAGGGA	chr12	10435840	GAGTGGACCGCAGATTACAGT;ACATCACACAGCTGCAGAGAT	GAGTGGACCGCAGATTACAGT	ACATCACACAGCTGCAGAGAT
KLRC3 (screen)	KLRC3	screen	2	TATCTTCAATGTTATTGTTC;GATTCAGAGAAGCATTTTGA	chr12	10420332;10420414	CAGTTGATTACAGTTGAACAATGCC;ACATCACACAGCTGCAGAGAT	CAGTTGATTACAGTTGAACAATGCC	ACATCACACAGCTGCAGAGAT
KLRC4 (screen)	KLRC4	screen	2	AATGCTTCTTCGGATCATCA;GAGGCAGCAAAGGAAACTTA	chr12	10409421;10409506	TGCATTCAACTGCACATCCT;ACCAGACTTTTATATTGGTCAACAG	TGCATTCAACTGCACATCCT	ACCAGACTTTTATATTGGTCAACAG
KLRD1 (screen)	KLRD1	screen	3	CTGTTCTTGCCAAGAAAAAT;AGAAAACTTGGAACGAAAGT;CTGTGTTTTGAAGCTGAAGC	chr12	10311491;10311553;10311591	TGTCTAGTCTCCAGTGTCATTAGT;ACACAGAACAGATAACTCAATTCCA	TGTCTAGTCTCCAGTGTCATTAGT	ACACAGAACAGATAACTCAATTCCA
KLRF1 (screen)	KLRF1	screen	3	TCCTGTATTCAAGTTTCTCA;TTCAAATGCCACTCAGTATG;AGCCTTGAGACATACCTGTC	chr12	9833307;9833360;9833451	TCCATTGAATGTGTCCCTGAAAC;CCATTTTCTCCCACTGCAACA	TCCATTGAATGTGTCCCTGAAAC	CCATTTTCTCCCACTGCAACA
KLRF2 (screen)	KLRF2	screen	3	ATTACTTGTGCCCAAATGAC;TTTCAACTTCTTTTAAAACG;TTTACTGGTGATTCAAAATT	chr12	9893043;9893094;9893155	ATTTCTATCTTCCCTGTTGGCTGT;CAGTGAACTTGCACCTAAGCC	ATTTCTATCTTCCCTGTTGGCTGT	CAGTGAACTTGCACCTAAGCC
KLRG1 (screen)	KLRG1	screen	3	CCAGACCGCTGGATGAAATA;AAAGGACTGGAATTCTAGTC;CCTTGTGATAACGGACAATC	chr12	8995174;8995227;8995278	AGGCTCCAACTACTCCACTTG;TGGGTCAGACAGCATAAGGG	AGGCTCCAACTACTCCACTTG	TGGGTCAGACAGCATAAGGG
KLRG2 (screen)	KLRG2	screen	3	CGCCGCCTTCTCCACGGCCC;CGCACCTTCGCGGGCACCTG;CGCGCGGGATGGAGGAGTCT	chr7	139483486;139483544;139483634	AAGGCGGCTTTTTCTTGCTC;CGTGGCCTGACAACTTCGG	AAGGCGGCTTTTTCTTGCTC	CGTGGCCTGACAACTTCGG
KLRK1 (screen)	KLRK1	screen	3	CTTTGCTGTATACTTTCAGA;TTTTTGATGAGAGTAAAAAC;CCTTTTCCAGAAAGTTACTG	chr12	10378579;10378629;10378699	AGAATAACCAAGTCACAGTGTCCC;AGAGTTGGAGTGAAAAAGGCAT	AGAATAACCAAGTCACAGTGTCCC	AGAGTTGGAGTGAAAAAGGCAT
KSR1 (screen)	KSR1	screen	3	TGCCCTGCTGGAGATGAATG;GGGGCCAGCGGGGATGAGTG;CCAGGCCTGTCACCTTCCGC	chr17	27577535;27577587;27577623	CTCTGCCTGTCCCTCTGTC;GAAACCCCTCAGATTCGGCC	CTCTGCCTGTCCCTCTGTC	GAAACCCCTCAGATTCGGCC
LALBA (screen)	LALBA	screen	3	GAGGCAGGGAACTCACATTC;CTCACATTTTGTGAATTGCT;GTTCTTTGTCCCTCTGTTCC	chr12	48569889;48569960;48569999	AGTAAAAGTGGAGGGGCGAAG;TTATGGAAGGAAGCTGGCAGG	AGTAAAAGTGGAGGGGCGAAG	TTATGGAAGGAAGCTGGCAGG
LAYN (screen)	LAYN	screen	3	TTCTCGAAGACTGAACTTTG;CAGACTCGATGCTGACTAGC;AGTCACCATCAGATGGCAAG	chr11	111544004;111544047;111544107	GATGCCTCCACGTATCCCTG;GCTTTGTTTCTCCTCACGCC	GATGCCTCCACGTATCCCTG	GCTTTGTTTCTCCTCACGCC
LBP (screen)	LBP	screen	3	GGAATCTAGGATGGGGGCCT;GCTGCTTACGTCCACCCCAG;CAGTCCCTTGTCGGTGATCC	chr20	38346524;38346578;38346617	CCATCCAGCCTCAGGAACTG;AGGCCAGAATAGGAGCCAGA	CCATCCAGCCTCAGGAACTG	AGGCCAGAATAGGAGCCAGA
LCP2 (screen)	LCP2	screen	3	CCAGACAATTACTTTGGCAC;CTTTCCGTGGTCGGTGGTAA;TGAACTCCACAGGTCACTCG	chr5	170262640;170262700;170262738	TGAACATCCCTCAAGCCACA;GGGTACATGGGACGTTCTGT	TGAACATCCCTCAAGCCACA	GGGTACATGGGACGTTCTGT
LGALS1 (screen)	LGALS1	screen	3	CCCCAGCTTCGTGCTGAACC;CGCCGTGGGCGTTGAAGCGA;CTGGGGGACCGAGCAGCGGG	chr22	37678494;37678540;37678614	GAGCAAACAGGGGAAGAGGG;CTCTGCAACACTTCCAGGCT	GAGCAAACAGGGGAAGAGGG	CTCTGCAACACTTCCAGGCT
LGALS12 (screen)	LGALS12	screen	3	ACCTCCCAGTAGGTTTCAGG;TTGAAGTGGAAGGCGATATC;CCTCTTCGCAGGGCCAGGTG	chr11	63508783;63508827;63508929	AGATGCACACAGGTAAGGCG;CTAGACCACCCAATGCCCG	AGATGCACACAGGTAAGGCG	CTAGACCACCCAATGCCCG
LGALS13 (screen)	LGALS13	screen	3	GGTGGATTTCTACACTGACA;CATGATTGCCAAAGTGCACT;AACAGACTACGTGCCCTTTG	chr19	39605213;39605253;39605333	ATTCTGCGTGCTTCACCCTC;TGTGATGAAAACCAGGGGCA	ATTCTGCGTGCTTCACCCTC	TGTGATGAAAACCAGGGGCA
LGALS14 (screen)	LGALS14	screen	3	AAGGAAACAGGCAGTGTGTA;GGAGTACTCACACAAAAGTG;AACCTTATGTGTGAGTGATG	chr19	39706606;39706668;39706755	CTTCAGGAATATGGGGCCCT;TGTCTGTTGCTGGAAGGTCT	CTTCAGGAATATGGGGCCCT	TGTCTGTTGCTGGAAGGTCT
LGALS16 (screen)	LGALS16	screen	3	CAGCAACGAACCACAGCTGC;AGTGCACTTAGGCCGTCGTG;CACTATGTGCCCTTTGAGGA	chr19	39658474;39658549;39658619	TGCGTGTCAAGTGTGTGTCT;GTAGTTACGGGAGATGGGCC	TGCGTGTCAAGTGTGTGTCT	GTAGTTACGGGAGATGGGCC
LGALS2 (screen)	LGALS2	screen	3	CTGACCCTGGGCTGAAGCAC;GTCCAATGAGTTGCAGACAA;TGCAGCTTTGTAATTAATCT	chr22	37570601;37570659;37570724	GCCAGGCTCTCTTCCATCTG;CCCAAGCTGCTTTATCCAGG	GCCAGGCTCTCTTCCATCTG	CCCAAGCTGCTTTATCCAGG
LGALS3 (screen)	LGALS3	screen	3	CAGACCCAGATAACGCATCA;TACCCAGGGGCTTCCTATCC;GCGCCTGGAGGTGCCTGTCC	chr14	55138053;55138149;55138195	CCTTTGCCATATTCCTCTCCTTCT;GGTAGACTCCAGGTGCAGGT	CCTTTGCCATATTCCTCTCCTTCT	GGTAGACTCCAGGTGCAGGT
LGALS4 (screen)	LGALS4	screen	3	GACTATGAAGACCAGCTCAA;TTGTCCCAGCCGTCAAACCG;CGTGAACTTTGTGGTTGGGC	chr19	38808779;38808882;38808926	AAGAAAAGGAAGGAAGGCGGG;GCACCAGGGGAATGAGCC	AAGAAAAGGAAGGAAGGCGGG	GCACCAGGGGAATGAGCC
LGALS7 (screen)	LGALS7	screen	1	GTTGAAATGCAGCGCGGCAT	chr19	38771987	CCTGCCTTCCACCAATAGCC;CCACCATCCTCCTCTTCCAG	CCTGCCTTCCACCAATAGCC	CCACCATCCTCCTCTTCCAG
LGALS7B (screen)	LGALS7B	screen	1	GTTGAAATGCAGGGCGGCAT	chr19	38790733	CCACCATCCCCCTCTTCCA;CTTTGCCCAACCCTCTGCT	CCACCATCCCCCTCTTCCA	CTTTGCCCAACCCTCTGCT
LGALS8 (screen)	LGALS8	screen	3	TCCCTCATATAGATTCCAGG;TGAAAGGCCACATCGGCTCG;GATAAATGAAAAATGGGGAC	chr1	236538884;236538922;236539004	CTGGTCCTTTACTGGTGGCT;CCTGTCCCTCTCCAAAACCT	CTGGTCCTTTACTGGTGGCT	CCTGTCCCTCTCCAAAACCT
LGALS9 (screen)	LGALS9	screen	3	AACTTTCAGACTGGCTTCAG;GTTTGAAGATGGAGGGTACG;CATGTGTGTCTTCCTCTCCT	chr17	27640599;27640652;27640697	TGTGCAAGATCCAGACAAATGC;TGAAATCTGAGCTCTGCACCA	TGTGCAAGATCCAGACAAATGC	TGAAATCTGAGCTCTGCACCA
LGALS9B (screen)	LGALS9B	screen	1	CACACGGTGCAGAGCGCCTC	chr17	20453036	CCCTCCTTGCTAAACCGCTT;GCTGGGGTGGTCTTTACTCA	CCCTCCTTGCTAAACCGCTT	GCTGGGGTGGTCTTTACTCA
LGALS9C (screen)	LGALS9C	screen	1	CAGAGGCACTCTGCACCGTG	chr17	18491293	GCTGGGGTGGTCTTTACTCA;CCCTCCTTGCTAAACCGCTT	GCTGGGGTGGTCTTTACTCA	CCCTCCTTGCTAAACCGCTT
LMAN1 (screen)	LMAN1	screen	3	CGAGTACAAATACAGCTTCA;TTCGTCCGGGGCGACGGCGT;AGATGGCGGGATCCAGGCAA	chr18	59359091;59359150;59359230	GGATGAAAGGCGAAGAGGCA;GGCTCTGCCAATCAGCGA	GGATGAAAGGCGAAGAGGCA	GGCTCTGCCAATCAGCGA
LMAN1L (screen)	LMAN1L	screen	3	AGGCGCCTTCACGATGCCGG;GACCCCCACAGCCCTGAGAC;AGCTCAGCTTCAAAGGCCCA	chr15	74812859;74812926;74812978	GAGGACAGTGCCAAAACCCA;GCCCCTCCAGCACTTTGAG	GAGGACAGTGCCAAAACCCA	GCCCCTCCAGCACTTTGAG
LMAN2 (screen)	LMAN2	screen	3	CACCTGGCACGAGGCGGTCC;ACAGGGAAGAAGAACCTCCA;GCCGTGCTTCCTCAAAGACT	chr5	177338502;177338538;177338590	CACGGGAGGCAGCACTTTC;TTAGCTGGGGAGAGAAGAGAGG	CACGGGAGGCAGCACTTTC	TTAGCTGGGGAGAGAAGAGAGG
LMAN2L (screen)	LMAN2L	screen	3	AAACGTTCGAGTACTTGAAA;TGTCGGCTCGGGATGGGTCC;GGGAAAGATGGCGGCGACTC	chr2	96739888;96739972;96740031	TGAAATCAAGTCCCGAAGCCC;TACAGAAGCCAGCCAATCGG	TGAAATCAAGTCCCGAAGCCC	TACAGAAGCCAGCCAATCGG
LSP1 (screen)	LSP1	screen	3	CCTCCGAGGGCTTCAGGCTG;GCAGCAGCACGAGGGGGCGC;CTGTCCTCTTGCTCCCCCTC	chr11	1881438;1881530;1881580	CGCCGTGAGGTGAGTGTG;GGCATTTCAGGCTCTGCTTG	CGCCGTGAGGTGAGTGTG	GGCATTTCAGGCTCTGCTTG
LY75 (screen)	LY75	screen	3	TCTCAGCTCATTTACCGATT;CAAATGAAAGAGCCGATGCT;ACCATCGTCCATGGAAATAC	chr2	159898883;159898937;159899029	TCCGTACAGAGAGTGGTGCT;GGGAACAGACTGAGGATGGG	TCCGTACAGAGAGTGGTGCT	GGGAACAGACTGAGGATGGG
LY86 (screen)	LY86	screen	3	AGTGGCTGTGAAACCCTTCA;GAAAGCCTGGCCCACACACG;GCAAGGGCTTACCGCAACTC	chr6	6588739;6588823;6588866	TGGTTCCCAGCGAGTCTAAA;CACTAGCGGCTCACATCTGT	TGGTTCCCAGCGAGTCTAAA	CACTAGCGGCTCACATCTGT
LY9 (screen)	LY9	screen	3	CAAAGAGTCACACAGATGAC;ATTTGCAGCTGACTCCTCTG;AAGTGGACTTACCCATGAGC	chr1	160796215;160796251;160796307	AGCTGTGGTAAGTGCATCCTC;GCCTCAGAAGAACCGCAGTA	AGCTGTGGTAAGTGCATCCTC	GCCTCAGAAGAACCGCAGTA
LY96 (screen)	LY96	screen	3	AGGGTGGAAAAAAACAGAAA;GGTGTATGAAATACTTGCAT;TTGTAGCATCAACTATTTTG	chr8	73991455;73991531;73991597	TGCTTACTGAAAAGGAAGAGTCTGA;TGATGTTTCGTGTGTTCCAGC	TGCTTACTGAAAAGGAAGAGTCTGA	TGATGTTTCGTGTGTTCCAGC
MAG (screen)	MAG	screen	3	CGTGCCTTCGAAGGCCGAGA;CTGCGGCCCGCTGTGGTGCA;CCACCGGGGGGTAGTTCTTG	chr19	35295658;35295731;35295767	GTGATCGGGTAGGACGTGTC;GTGTACTGGTTGTAGCCGCC	GTGATCGGGTAGGACGTGTC	GTGTACTGGTTGTAGCCGCC
MALT1 (screen)	MALT1	screen	3	AGCTCTGATGTATTTCCATT;TCACCTTTGAATTCAGCCAG;TACTTACTCTGGAAGCTCTC	chr18	58700450;58700546;58700582	GGGGCCAGCTTAACTCTCTG;TCCCCATCCCAACATTCAGC	GGGGCCAGCTTAACTCTCTG	TCCCCATCCCAACATTCAGC
MAP3K1 (screen)	MAP3K1	screen	3	CCCGCGAGAGAAAATGGCGG;GCTACGAGCCCTGAGGCAGG;TGCCGCGGGACTGCTGCGGG	chr5	56815578;56815645;56815707	GCCCGTCGGTCAGTCC;GCTCCACACTCCGCACTTTG	GCCCGTCGGTCAGTCC	GCTCCACACTCCGCACTTTG
MAP3K14 (screen)	MAP3K14	screen	3	CCCACTTTCCGCAGAACACA;CAAGGAGAAGACGCCGCCAC;ATGGCCTGCCCAGGTGCCCC	chr17	45290597;45290655;45290714	GGGCGATGATAGAGATGGCA;CCTGCTCTGTGTTTGGTCTCT	GGGCGATGATAGAGATGGCA	CCTGCTCTGTGTTTGGTCTCT
MAP3K7 (screen)	MAP3K7	screen	3	TAACTTACTTTGGTGGTTTC;GTGAAGATAAGCCACTCCTT;GCAGCAGTATAATATGGCAA	chr6	90560085;90560140;90560192	TTAGAGAGTGGGTTCGGGGT;AGCAGGACTGATGGAGCATATG	TTAGAGAGTGGGTTCGGGGT	AGCAGGACTGATGGAGCATATG
MAP3K8 (screen)	MAP3K8	screen	3	GTCTGATGTAATAGACATTA;TGACACATGGTCATTAGACT;TATCTGACTGATGACAACCA	chr10	30439024;30439074;30439155	AGTTGACACAGAACCCTCGTT;GCAAGCAAATCCTCCACAGTT	AGTTGACACAGAACCCTCGTT	GCAAGCAAATCCTCCACAGTT
MAPK14 (screen)	MAPK14	screen	3	AGGAGAGGCCCACGTTCTAC;AGACAGGTTCTGGTAACGCT;AGGCCTGGCCCTCGGGCGCG	chr6	36028182;36028225;36028322	GCCACCTTCTTGCCCGG;ACCTACCTCTCGCAGCGG	GCCACCTTCTTGCCCGG	ACCTACCTCTCGCAGCGG
MARCO (screen)	MARCO	screen	3	TTTCCTCAATGACACTCTGG;ATCGAGGCTGCAAGTCCTGC;CCCGCTGCAGCAAGTGCTCA	chr2	118970171;118970261;118970298	GGCCCAGTTCTGAATCTGCA;ACACTTTGCTTGGACAGGGT	GGCCCAGTTCTGAATCTGCA	ACACTTTGCTTGGACAGGGT
MAVS (screen)	MAVS	screen	3	CCCACGGGATGGTGTGAGGC;AGCCGCTTGCCTGGACCCAC;GCCCCTGCAGAGGCCAAGCC	chr20	3864271;3864359;3864411	CCAAGGGCAGGAGATTTGGA;ACTTTCAGGGCCACTGTGTT	CCAAGGGCAGGAGATTTGGA	ACTTTCAGGGCCACTGTGTT
MB21D1 (screen)	MB21D1	screen	3	CGGGATCCCGACTTCCTGGC;CGAGTCTCCGGCTGCCCCCG;GGCCATGCAGAGAGCTTCCG	chr6	73452020;73452061;73452145	CTCTGGCGGCAAGAACCA;TCGGGGAACAGAAAGCGC	CTCTGGCGGCAAGAACCA	TCGGGGAACAGAAAGCGC
MBL2 (screen)	MBL2	screen	3	GATGGGCGTGATGGCACCAA;CACTGCAGGGCAGGTCTTTT;ACCATACTCAGGAGAAGGAG	chr10	52771472;52771548;52771609	AGTCTCCTCATATCCCCAGGC;AGAGGGCATGCTCGGTAAAT	AGTCTCCTCATATCCCCAGGC	AGAGGGCATGCTCGGTAAAT
MPZL1 (screen)	MPZL1	screen	3	TGGACGATGGCAGCGTCCGC;GCACCGACCACAGCCAGCGC;CGATGGGCGTGTGTCGGGCC	chr1	167722163;167722205;167722293	GCGGAGAGATCAGAAGCCTC;CTCGGCTCTCAGTGCGC	GCGGAGAGATCAGAAGCCTC	CTCGGCTCTCAGTGCGC
MRC1 (screen)	MRC1	screen	3	CCAAACCGCAGCTTGCAACC;TGTTGCATTTAAATTATGCC;CAAAAAGTGAATTTCAGAAA	chr10	17823161;17823233;17823307	ATGAAGATCACAAGCGCTGC;CACCTGCTCCATAAACCCGA	ATGAAGATCACAAGCGCTGC	CACCTGCTCCATAAACCCGA
MRC2 (screen)	MRC2	screen	3	GTCTTCCTCATCTTCAGCCA;CCAGCCTCCCTGCCCAGCGC;CCTGGGTACCATGCAGTGCC	chr17	62664573;62664655;62664707	GTGATGCCTTCGTGTCTTGC;GATTCAGTGCTTCCCGGTCA	GTGATGCCTTCGTGTCTTGC	GATTCAGTGCTTCCCGGTCA
MYD88 (screen)	MYD88	screen	3	TCCTGGAGCCTCAGCGCGGT;GGAGGATGTGGAGGAGACCG;GTTCTTGAACGTGCGGACAC	chr3	38138675;38138741;38138822	GCTCCAGATTGTAGGGCAGG;TCCGCTTGTGTCTCCAGTTG	GCTCCAGATTGTAGGGCAGG	TCCGCTTGTGTCTCCAGTTG
NCAN (screen)	NCAN	screen	3	CTTTATCCGAGGGGCATCTC;GGCCAAGGACAATGTCGTGA;GTTGGCTCGGCGCCGGGGGT	chr19	19219056;19219143;19219191	TATCACCGATGCCAGCGAAA;AGGTCCTGCTCATCCTCGAT	TATCACCGATGCCAGCGAAA	AGGTCCTGCTCATCCTCGAT
NFKB1 (screen)	NFKB1	screen	3	ATATAGATCTGCAACTATGT;GTGTTTTCCCACCAGGCTGT;TACCCGACCACCATGTCCTT	chr4	102566998;102567066;102567122	CACCCTGTCATTTGTTCATCACA;AGGGGCCTGTTCATTCTAAGT	CACCCTGTCATTTGTTCATCACA	AGGGGCCTGTTCATTCTAAGT
NFKB2 (screen)	NFKB2	screen	3	CCCTCCCATGGAGGACTGCC;GCTCACCTTGACAGTGGGAT;TCCTAGATCTGTAACTACGA	chr10	102396775;102396813;102396915	TGCTACTATGCCCTTGGACC;ACAGAAACGGCGCAGATCC	TGCTACTATGCCCTTGGACC	ACAGAAACGGCGCAGATCC
NFKBIA (screen)	NFKBIA	screen	3	CTCGTACTCCTCGTCTTTCA;TCCTTCTTCAGCCCGTCGCG;CGTCCGCGCCATGTTCCAGG	chr14	35404533;35404594;35404638	GCCTCCGCCACTTACGAG;CCCCAGCCAGCGTTTATAGG	GCCTCCGCCACTTACGAG	CCCCAGCCAGCGTTTATAGG
NLRC3 (screen)	NLRC3	screen	3	TAGGACACCGGATGCCCCGC;CCCAGCCAGCAGATCCATGA;GCAAGAGGTGCGGACGGGCA	chr16	3564880;3564952;3565012	TGTATCCTTGAGTCTGCGGG;GGTTCAGGCCCTCTCTTCAC	TGTATCCTTGAGTCTGCGGG	GGTTCAGGCCCTCTCTTCAC
NLRC4 (screen)	NLRC4	screen	3	ATTCACATGATTTTGAAAAA;TCAGAACATTCCATACAAAT;CGAGCCCTTATTCAAAGAAT	chr2	32252502;32252598;32252640	GCCAGGTGATATGAAGAGAAGGA;TCTCCCCATCTCCTCAGTGAAT	GCCAGGTGATATGAAGAGAAGGA	TCTCCCCATCTCCTCAGTGAAT
NLRC5 (screen)	NLRC5	screen	3	ACAGGTTCTTGTTGCCGAGC;ATCTTGGCGTTCAGCCATTC;AGGGTCCAAGGTCTCGTTCC	chr16	57020736;57020791;57020846	TGTCCCCCTCAACTCACCTA;GACTGCCAGGTGTCCGAAC	TGTCCCCCTCAACTCACCTA	GACTGCCAGGTGTCCGAAC
NLRP1 (screen)	NLRP1	screen	3	TGTCTCACCCGAAGAGCTCC;CCTTCAGCTCCTCCTTCTTC;GAGATGGCTGGCGGAGCCTG	chr17	5583852;5583908;5583944	AGGTATGGAGGGCTAGGTCC;CCCCCTCTATCGGCGTCTAT	AGGTATGGAGGGCTAGGTCC	CCCCCTCTATCGGCGTCTAT
NLRP10 (screen)	NLRP10	screen	3	CTGCCAGGTCCACCGGAATC;TCTTGAAATCGTTCTCCTCA;GATCACCATGGCCATGGCCA	chr11	7963338;7963434;7963486	GAGCTGGTCCACAAGTTCCA;GTCACTGGTCTTCTGGTCTGG	GAGCTGGTCCACAAGTTCCA	GTCACTGGTCTTCTGGTCTGG
NLRP11 (screen)	NLRP11	screen	3	ATTCCCACGTGTGGGCCTTG;AGTTCCCATTCCAGTTCTCC;TTATGTTGTCCAAGTCCTCG	chr19	55809778;55809838;55809924	GGTCGTGCAGCAATCTACCT;GTCGTTCACCTCACTGCTCA	GGTCGTGCAGCAATCTACCT	GTCGTTCACCTCACTGCTCA
NLRP12 (screen)	NLRP12	screen	3	GGCCTCCTCTGGCCCGAAGT;ACCGCGACAGAGCTGGGAGA;CTGTCGCCTGTCCACCTACT	chr19	53823985;53824059;53824129	GGTCCTTCCTGTTTATCCGCT;GCTGCCTGTGAATGATGCAA	GGTCCTTCCTGTTTATCCGCT	GCTGCCTGTGAATGATGCAA
NLRP13 (screen)	NLRP13	screen	3	GAAGTGTTCATCCAAAAGAA;GCACTTCCCGCGTATCCCCT;TCTGCCTTACCTGATGGCCC	chr19	55932101;55932146;55932245	CACAAAAACCCAGCGGCTAC;TGTAATCACCTGCCCCAACG	CACAAAAACCCAGCGGCTAC	TGTAATCACCTGCCCCAACG
NLRP14 (screen)	NLRP14	screen	3	GTTATTCCTAAAGGAGACCA;ATTGGCCAGGTCCTCCCGCC;GATTTTGAGAGACACACTCC	chr11	7038696;7038750;7038804	TTTCCTGATTTTGGGCTGCT;CCGATTTGCCCCTAGCATCA	TTTCCTGATTTTGGGCTGCT	CCGATTTGCCCCTAGCATCA
NLRP2 (screen)	NLRP2	screen	3	CCCCCACAAGGAGGTAGACA;CCACCCATTGTGACAGCTAC;CTCTCTCAGACAGATCCATT	chr19	54970158;54970211;54970261	GATCACGACCTTCTCCCTGG;CGCCTGGCCTTCTGAATTTCT	GATCACGACCTTCTCCCTGG	CGCCTGGCCTTCTGAATTTCT
NLRP2B (screen)	NLRP2B	screen	3	ACATAGGTAGACAAGGCTGA;TGAACTTGCACAAGTCATCC;GATGGTGTCTTCTGCACAGC	chrX	57680112;57680199;57680245	TTCTCAGACAGATCCGCTCG;GATTGCTGACTCACCATCCCT	TTCTCAGACAGATCCGCTCG	GATTGCTGACTCACCATCCCT
NLRP3 (screen)	NLRP3	screen	3	GCTCAGAATGCTCATCATCG;GATGATGTTGGACTGGGCGT;CAAGGCTCACCTCTCGACAG	chr1	247424079;247424174;247424226	CTACACACGACTGCGTCTCAT;AGCTCATGATCAGGTCCCCC	CTACACACGACTGCGTCTCAT	AGCTCATGATCAGGTCCCCC
NLRP4 (screen)	NLRP4	screen	3	AGCAGAAATTCAGCCGCTTA;GCAAGAAGAATGTGACCATT;CCACGTACAGTGATCATTCA	chr19	55857721;55857794;55857852	CACAGTGTGTAGACCCCTGG;CCCGAAAGATCTTGTTGTCCG	CACAGTGTGTAGACCCCTGG	CCCGAAAGATCTTGTTGTCCG
NLRP5 (screen)	NLRP5	screen	3	GTGTCTCTATGAGCTAGACA;TGAAATCGAGAATGCCAACG;TTATGGAGCATCGCTGGCCT	chr19	56003871;56003967;56004018	TTTTCCCCCAAAACCTGAGCT;CATGTCATCCCGTGCCTTCT	TTTTCCCCCAAAACCTGAGCT	CATGTCATCCCGTGCCTTCT
NLRP6 (screen)	NLRP6	screen	3	CACGGGGCCGCGCCTCGCGG;GGACGGACGCAGCATCCCGT;ACTGGGCCAGCTGCTCCGCG	chr11	279344;279452;279492	CCCCATGGATCCAGACGATG;CTCTTGAGGGTCTTGCGGG	CCCCATGGATCCAGACGATG	CTCTTGAGGGTCTTGCGGG
NLRP7 (screen)	NLRP7	screen	3	GCCTCTTCCACCTCAGACCA;GAGTTTCAAATCCCTTTTAT;CTGCAGAGTCCACTCTAGCT	chr19	54941583;54941627;54941696	TCCAAGATGTTCACAGTCGCA;CCCAGTTCTTCAGCCTTAACCT	TCCAAGATGTTCACAGTCGCA	CCCAGTTCTTCAGCCTTAACCT
NLRP8 (screen)	NLRP8	screen	3	GTGAGTGGAGGAGGATGAAA;CCCGGCTCCCCATGTGAAAA;TGAACCGTTGTAGCTCCTCA	chr19	55947946;55948016;55948055	TCTGCAGGTCTCGTGTTTCTC;TCGAAGTCACATCCCAAGCG	TCTGCAGGTCTCGTGTTTCTC	TCGAAGTCACATCCCAAGCG
NLRP9 (screen)	NLRP9	screen	3	AGATCTCTGGACAAAGGCTC;CAAACATTACCCAGGAAAGC;TTCAGCTCAGCCCAGGGGAT	chr19	55738113;55738179;55738249	TCACCTTGTTCCCAGGCTTC;ACAATCCTGGGGCGATATGG	TCACCTTGTTCCCAGGCTTC	ACAATCCTGGGGCGATATGG
NLRX1 (screen)	NLRX1	screen	3	AAGCTATACAGCGGCACCGC;GGGCAAAGGTTGGGCCAAAC;GCTCATCAGGGGTACTCTCG	chr11	119173496;119173549;119173600	CTCAGGGAGTCTTGTGTGCC;GGCATCCGGGTTAAAGAGCT	CTCAGGGAGTCTTGTGTGCC	GGCATCCGGGTTAAAGAGCT
NOD1 (screen)	NOD1	screen	3	GCTGAAGAATGACTACTTCT;GAAAAGCAATCGGGAACTTC;ACTTTAACTATGGAAGAGCA	chr7	30456774;30456837;30456914	TGGACTAAACTCCCACGCTC;CCCTTCTGCTGAGAGGACAC	TGGACTAAACTCCCACGCTC	CCCTTCTGCTGAGAGGACAC
NOD2 (screen)	NOD2	screen	3	GTGCTCGCAGGAGGCTTTTC;GACACTCTCGAAGCCTTCCA;CTACGAGGGCTTCCACCTCC	chr16	50699515;50699566;50699641	TCCCGCACTGACCTTGTTC;GCTTCTGACAGGCCCAAGTA	TCCCGCACTGACCTTGTTC	GCTTCTGACAGGCCCAAGTA
OLR1 (screen)	OLR1	screen	3	TCTCATTCAGCTTCCGAGCA;AAGCTTCTTCTGCTTGTTGC;GTGTTAGGAGGTCAGACACC	chr12	10166807;10166870;10166948	CACCCTTCTCCCAATACCTGAA;TCCCTGGAGGGATTTTTATTTGGAT	CACCCTTCTCCCAATACCTGAA	TCCCTGGAGGGATTTTTATTTGGAT
OR2D2 (screen)	OR2D2	screen	3	CTTCTCTTTTTCCTCATTTT;AGCAGGTGGACTAGTGCCTG;TTTTCTCTGCAACTTGTCTC	chr11	6892184;6892261;6892302	GGTCCATGATCCTGTTGCCA;TACCTGGTCACTGTGCTTGG	GGTCCATGATCCTGTTGCCA	TACCTGGTCACTGTGCTTGG
OR51T1 (screen)	OR51T1	screen	3	TAGATCAACAGCTGCCAGCA;GTGTTCTCTGGTTTCATGCC;TGTGCATGCTTTCTCCTTGC	chr11	4882102;4882170;4882231	CTGTCTCTACACCATTGCCCT;GATGACCAGCCCTATCACCA	CTGTCTCTACACCATTGCCCT	GATGACCAGCCCTATCACCA
PAK1 (screen)	PAK1	screen	3	TTCTTCTCCTCTGGGTTTGG;TGCTGGTATTTCTCATCGGA;GTGGTGACAATGTCAAATAA	chr11	77392392;77392474;77392513	ACAGATCTTTTATCCAGGTTACCCA;CTGAAGGAAGGGCTGTATAATTTTG	ACAGATCTTTTATCCAGGTTACCCA	CTGAAGGAAGGGCTGTATAATTTTG
PIK3CD (screen)	PIK3CD	screen	3	GTGGAAGAGCGGCTCATACT;GACAGCGGAGCAGCAAGAGC;GGTCGCCCTCACGGGCCACC	chr1	9715563;9715641;9715705	AGAGTGCAGATCTTGGGGTC;CGATGAGGAGGCTGATCTGT	AGAGTGCAGATCTTGGGGTC	CGATGAGGAGGCTGATCTGT
PIK3CG (screen)	PIK3CG	screen	3	GGAGAACTATAAACAGCCCG;CACTGCGCGGCTTCATCCTC;CACGTGCAGCAGCGCCGTTT	chr7	106867587;106867627;106867728	ACATGTACGCCGCCTATACC;CAGCCGGTGGTAGAAGTCC	ACATGTACGCCGCCTATACC	CAGCCGGTGGTAGAAGTCC
PILRA (screen)	PILRA	screen	3	TCTGCAGGTTGGAGATCCTG;GGAGCTCAGGGAGGCAGCAG;AAAGCGGGTGCCAGGGCAGC	chr7	100374312;100374391;100374446	CCCGACGTGAGAATATCCTGG;GGTCGTCAGAAGAAGTGGGG	CCCGACGTGAGAATATCCTGG	GGTCGTCAGAAGAAGTGGGG
PKD1 (screen)	PKD1	screen	3	CCCCGCGGCCACGGGCGTGT;GAAGGTCCAGGGCGACTCGC;TGCGAGCCTGGCATCGCCAC	chr16	2109082;2109118;2109213	CCAGCGTGCGGTTCTCAC;CCGTTTCTCCCACAGCTTCC	CCAGCGTGCGGTTCTCAC	CCGTTTCTCCCACAGCTTCC
PKD1L3 (screen)	PKD1L3	screen	3	TACCGGCTCAGTATGACGCT;GAATGAAAGGGGCAGACAGT;ACTCCTCACTCAGGTAAATA	chr16	71982073;71982140;71982213	CTTGGAGAAGGCATGGCAGA;ACAATTCAAGGGTGTATGTTTGCT	CTTGGAGAAGGCATGGCAGA	ACAATTCAAGGGTGTATGTTTGCT
PLA2R1 (screen)	PLA2R1	screen	3	GGGCGGAGAAATTCAGGCCC;TTGCTTGCTTGCAGTTCTCC;ATTTCTTGAGACTCTCACTT	chr2	160044995;160045082;160045133	TCTCCACCACCTGACCCATA;CTGAGATCCTCATGACGCTAGT	TCTCCACCACCTGACCCATA	CTGAGATCCTCATGACGCTAGT
PLCG1 (screen)	PLCG1	screen	3	GTGCAGCACCTCGGCGTCCG;AGAAGTCGCAGCGACCCGAG;CGCCCCGGCTCCACGTGATC	chr20	41137697;41137780;41137821	GGTCCCGCTCGTCTGC;TGGGCGCACTTACTGGC	GGTCCCGCTCGTCTGC	TGGGCGCACTTACTGGC
PLCG2 (screen)	PLCG2	screen	3	TTCTCCCTGTAGTGGACTGC;CAAGTTTGACGACGTCGTGC;AAATCAGCCAACTGACCTCG	chr16	81895812;81895891;81895927	GGAAAGCCATGTCCTCGTGT;GCATTTGGAGGGAGGTGTCT	GGAAAGCCATGTCCTCGTGT	GCATTTGGAGGGAGGTGTCT
POLR2A (screen)	POLR2A	screen	3	CCAAGGGACAGCCCAAGAAG;GCAAAAACATATGCGAGGGT;CGAGGATCTGACCAAAGAAA	chr17	7496491;7496542;7496609	TGTCCCCAGAACAACCCAAA;CCGCATACAACTCTAGGCCA	TGTCCCCAGAACAACCCAAA	CCGCATACAACTCTAGGCCA
PPP3R1 (screen)	PPP3R1	screen	3	TCTATTACTCGCTGTACTAA;CAATTCTGGTTCTTTGAGTG;TTGATGCGGATGAAATTAAA	chr2	68188572;68188619;68188674	AGACGCTGAGGTTTTAACATAATCT;GCTACTGCCCATTAGAAAGGATT	AGACGCTGAGGTTTTAACATAATCT	GCTACTGCCCATTAGAAAGGATT
PRG2 (screen)	PRG2	screen	3	AGATGCCTCCAAGAAAGATG;GATGGAGGAGACCCCTTGCA;ACCCAAAGGGGTCTCAAAGG	chr11	57389165;57389225;57389300	GCCACTCACCCAAGCTTGA;GCAAGGTGTGAGCTGTCTGT	GCCACTCACCCAAGCTTGA	GCAAGGTGTGAGCTGTCTGT
PRG3 (screen)	PRG3	screen	3	TCAAGACAACTTTGAGGATG;TCTGACGGAGGAGGTGATTC;AGAGAATGATGCCCCCCATC	chr11	57379646;57379700;57379793	AGTTTTAGGAGTCCGCACCA;CACGGTGCTGGAACTAGGAA	AGTTTTAGGAGTCCGCACCA	CACGGTGCTGGAACTAGGAA
PRKCD (screen)	PRKCD	screen	3	TGCAGAGCGTGGGAAAACAC;GTTCGATGCCCACATCTATG;GACCGTGGGTGTGTCGGTGC	chr3	53179589;53179652;53179730	GCTCTAGAGGACACTGGGGA;CCCCTTACCCAGAACTCAGC	GCTCTAGAGGACACTGGGGA	CCCCTTACCCAGAACTCAGC
PTPN11 (screen)	PTPN11	screen	3	TTTCCAGACACTACAACAAC;AATATTGATACTTACAGGGC;AGGAAAGGTACAGAGGTGCT	chr12	112472954;112473039;112473097	CGCACACAATTCTGAACATTTCC;AAGGCCTCCGATGTGCTAAC	CGCACACAATTCTGAACATTTCC	AAGGCCTCCGATGTGCTAAC
PTPN6 (screen)	PTPN6	screen	3	TCACCGAGACCTCAGTGGGC;TCCACGGTAGCTTCCTGGCT;CGGGGGGCCCACCTACCTGA	chr12	6951632;6951685;6951731	CACGGTAGACAGGAGGCAAG;CAAGGGAACAGACGGGGAG	CACGGTAGACAGGAGGCAAG	CAAGGGAACAGACGGGGAG
PVR (screen)	PVR	screen	3	ACGGAGTCGCCCAAGAAGCC;CAGCTGACTTGGGCGCGGCA;AGCTGGGGCCCTGCGTTTGG	chr19	44647261;44647347;44647383	GCCCCTCCCTATCTAGTCCA;CCTTCATCCTCTACGCGCAA	GCCCCTCCCTATCTAGTCCA	CCTTCATCCTCTACGCGCAA
PYCARD (screen)	PYCARD	screen	3	GTAGAAGCTGACCAGCTTGT;GTTCAAGCTGAAGCTGCTGT;GCGCGCGCGCGACGCCATCC	chr16	31202528;31202609;31202669	GGCCCATGTCGCGCA;GAGCCGACTTCCTCCTGG	GGCCCATGTCGCGCA	GAGCCGACTTCCTCCTGG
RAC1 (screen)	RAC1	screen	3	CTCTTTCTCTTTAGAGCTGT;TTTAAGATACTTACACAGTA;TGGCTTTACAGCAAAACAAA	chr7	6387215;6387281;6387348	GGGTACCAATGTGTATGTGGTG;CCACCCCCAGCCCTATTTTT	GGGTACCAATGTGTATGTGGTG	CCACCCCCAGCCCTATTTTT
RAF1 (screen)	RAF1	screen	3	ATAGTGTTGCTTGTCTTAGA;GCAGTTTGGCTATCAGCGCC;TGCATCAATGGAGCACATAC	chr3	12618566;12618604;12618712	TGTTCACATACCACTGTTCTTTGC;CTGATGAATGCAGGAGGTATCAT	TGTTCACATACCACTGTTCTTTGC	CTGATGAATGCAGGAGGTATCAT
REG1A (screen)	REG1A	screen	3	TGAGGCCACAAAGGCACCCT;CTCCATGACCCCAAAAAGGT;TAAGAAGGAGGTTCAAGTTC	chr2	79122046;79122125;79122188	CCGTCACAACTTCCTCCTCC;CTCCAATCATCTACAGTGCACCT	CCGTCACAACTTCCTCCTCC	CTCCAATCATCTACAGTGCACCT
REG1B (screen)	REG1B	screen	3	TAAGAGGGACGTTTAAGGTC;GGCTGCAGACTGACCTTTTT;CCACGAAGGCACCCTCCGCC	chr2	79086304;79086370;79086452	GTGCATGAATTCCCAGAGCC;TCCAACAGCTCTATTGCCAGA	GTGCATGAATTCCCAGAGCC	TCCAACAGCTCTATTGCCAGA
REG3A (screen)	REG3A	screen	3	GGGGAGGAGGGTCTCCATTC;TCTGCATCTGTCCAGGATTT;GGGACAGCGGATCCGTGCAG	chr2	79158594;79158669;79158740	GACACCAGGTTTCCAGAGGG;GCCCCACTCTTCATTTTACCC	GACACCAGGTTTCCAGAGGG	GCCCCACTCTTCATTTTACCC
REG3G (screen)	REG3G	screen	3	GGGACAGCTGATCCGTGGAG;ACTCACATCTGCATCCATCC;TCCATGCAGGTCTCAGGGGG	chr2	79026743;79026821;79026889	CCACCCACCCCCTACTCTT;CCAGCTTTGAGGGGGACAAA	CCACCCACCCCCTACTCTT	CCAGCTTTGAGGGGGACAAA
REG4 (screen)	REG4	screen	3	TGGCCTGCACGACCCACAGA;TATGTACTCTGCTATGGTGC;TAGCTCGAGTGTCAGTCTTA	chr1	119799730;119799796;119799849	CCCAAAAAGAGGATGCCAGC;TTCTCTGAGACCGAACGCTG	CCCAAAAAGAGGATGCCAGC	TTCTCTGAGACCGAACGCTG
REL (screen)	REL	screen	3	GTTCAATTATCTCTATATAC;AAATGTGAAGGGCGATCAGC;CCGAACATACCCTTCTATCC	chr2	60891699;60891765;60891821	CTCCCAGCCAATCTCCAAGA;GACTGTGAAGAAACTGGCCCT	CTCCCAGCCAATCTCCAAGA	GACTGTGAAGAAACTGGCCCT
RELA (screen)	RELA	screen	3	CGCAGTGCTGACCTTGATGG;CGCTCCGCGGGCAGCATCCC;GATCTCCACATAGGGGCCAG	chr11	65661942;65661986;65662071	TGTCCAAAGTACAGAGGCCC;GTGCTGACCCTGATCTCCCT	TGTCCAAAGTACAGAGGCCC	GTGCTGACCCTGATCTCCCT
RELB (screen)	RELB	screen	3	GCCGGCCCGCGTGCATGCTT;TCGGCATGGCCCGGCCAGTG;TTACCTAAGGCCCCCAGCTC	chr19	45001583;45001621;45001673	GACCCGCGATCGTCCAC;CTCTGCCTTCTTCCTACGCC	GACCCGCGATCGTCCAC	CTCTGCCTTCTTCCTACGCC
RHOA (screen)	RHOA	screen	3	CTATGTGGCAGATATCGAGG;GAGCAAGCATGTCTTTCCAC;TTTCAGCAATGGCTGCCATC	chr3	49375451;49375541;49375581	AGCTCTAATTCTCTACATGCTCCA;AGGTGGATCGGCGTACTAGA	AGCTCTAATTCTCTACATGCTCCA	AGGTGGATCGGCGTACTAGA
RIPK1 (screen)	RIPK1	screen	3	ATGACATTCAAGGACATGTC;AACTGGACAGCGGAGGCTTT;TTTCATGATCATGAGTCCCT	chr6	3076836;3076905;3076942	GGTACAGCTCTGCCGGG;AACAGCCAACGTCCCCATC	GGTACAGCTCTGCCGGG	AACAGCCAACGTCCCCATC
RIPK2 (screen)	RIPK2	screen	3	GCCCGGGACCATGAACGGGG;GCGGCTCAGGTAGCGCAGGT;GTGGATGTGCAGGTGCTTCA	chr8	89758068;89758122;89758200	CCCTCGTGACCTAGTGTTGC;CTCTAGAGCCCGCTTGTCAG	CCCTCGTGACCTAGTGTTGC	CTCTAGAGCCCGCTTGTCAG
RNF216 (screen)	RNF216	screen	3	TAACCAGCAGTCTTCTTCGA;TCTCTGAGTCTTCGGATGAC;AGAGCAGAAAGTCATCATCT	chr7	5741344;5741418;5741479	ATGCTGAAACAACAAGCGGC;CCGAGTCATAACCAAGCAGC	ATGCTGAAACAACAAGCGGC	CCGAGTCATAACCAAGCAGC
RPE65 (screen)	RPE65	screen	3	GAGTGCTGCTTTACCTTCTG;GGGCTTGCCCATCAAACAGG;TCACAGGCAGGATCCCCCTC	chr1	68446713;68446776;68446850	AAGCCACTCATGTTGGACCC;TGCCTTACCAAGGACAAGCC	AAGCCACTCATGTTGGACCC	TGCCTTACCAAGGACAAGCC
SDC1 (screen)	SDC1	screen	3	AGAGGGGCCCAAGGAGGGAG;CCCACGTCTCCAGAACCCAC;GGAGGGGGTCTGCTGTGACA	chr2	20204136;20204201;20204268	CAGATGAGTGGTCGGGAGC;ACTAGCCTCCCTCATAGCCT	CAGATGAGTGGTCGGGAGC	ACTAGCCTCCCTCATAGCCT
SDC2 (screen)	SDC2	screen	3	TACTTTTCCAGGAGCTGATG;GCACTAGTCAACAGTATCTT;GAACGCACCTTTGTCTGAGC	chr8	96602401;96602451;96602520	TCAGTGTCAACGTCAGGCAA;ACAGTCAGTAAAGTGAAGCATTTGT	TCAGTGTCAACGTCAGGCAA	ACAGTCAGTAAAGTGAAGCATTTGT
SDC3 (screen)	SDC3	screen	3	CACTGCTGCCACAAGCACAG;TGTCACCACCAGGGGGCTGG;CAAATGGTGTGCCCACAGGC	chr1	30876911;30877001;30877060	CGTACGCCAGTGGTCCTTAT;CTTCAGCCCAGATGTAGCCC	CGTACGCCAGTGGTCCTTAT	CTTCAGCCCAGATGTAGCCC
SDC4 (screen)	SDC4	screen	3	CTGTCTGGCTCTGGAGATCT;CTACATCCTCATCGTCTGGT;GGTCGATGACCTCAGTCTCT	chr20	45335787;45335853;45335913	GTCTCAAGGCATGGTCACCC;CGCGGTGAGTTAGAGGTAGAG	GTCTCAAGGCATGGTCACCC	CGCGGTGAGTTAGAGGTAGAG
SELE (screen)	SELE	screen	3	TCACCAAGTTATTACTGGAT;CTTTGTTTTGAATTGCAACC;ATCATAAGTCATAGCTTCCG	chr1	169732824;169732893;169732951	CTTGGCTTCTTCTGTCAGAGGT;AAAAGTCTGGGCCATGTCACA	CTTGGCTTCTTCTGTCAGAGGT	AAAAGTCTGGGCCATGTCACA
SELL (screen)	SELL	screen	3	CTTTCAGTCGTTCTTACTAC;CTAAATCTGTGTAATTGTCT;ATAATGGTAAGTCCAGCAGT	chr1	169708631;169708713;169708777	CGCAGTCCTCCTTGTTCTTCT;GCCTGGAGTAGTGCTAGGTTC	CGCAGTCCTCCTTGTTCTTCT	GCCTGGAGTAGTGCTAGGTTC
SELP (screen)	SELP	screen	3	CTCGTTGGTGAGAGCCTTTT;TACAGCTCCTACTACTGGAT;AGCGATTCTGGCAGTATTTA	chr1	169617187;169617237;169617336	GGCTGACGGACTCTTGATGT;CTTGGGATCACGGCCTCTTT	GGCTGACGGACTCTTGATGT	CTTGGGATCACGGCCTCTTT
SFTPA1 (screen)	SFTPA1	screen	3	CCATCATTTCCAGGAGGACA;CCTGGCGAGAGGGGCCCTCC;CGACCCTGAAGTCAGTTACA	chr10	79612344;79612427;79612492	GTGCCCACGGAGTGATAGAG;TAGGTTGAGCCAAATGCCCT	GTGCCCACGGAGTGATAGAG	TAGGTTGAGCCAAATGCCCT
SFTPA2 (screen)	SFTPA2	screen	3	ACCCCTGTGTAACTGACTTC;GCTGGCGAGAGAGGCCCTCC;GGAGAAACACCATGTCCTCC	chr10	79558834;79558891;79558972	CTCAGTGTGTCCCCATCAGC;GTCCTCATAGTGCCCACGG	CTCAGTGTGTCCCCATCAGC	GTCCTCATAGTGCCCACGG
SFTPD (screen)	SFTPD	screen	3	GCCTGCCTGGTCGCGATGGA;GGGCATTGTTCTGTGGGAGT;GCAGGACCAGTGCAGAGAGG	chr10	79946507;79946581;79946643	CCAATGACCATTCCTCCCCA;AGCCAAGCCCTAAACCATGT	CCAATGACCATTCCTCCCCA	AGCCAAGCCCTAAACCATGT
SIGLEC1 (screen)	SIGLEC1	screen	3	CGAGTAGTCGTAGTACCAGA;TGAAGATGCAGGGGATAAGC;TGGAGACGCCCCATGAGGCC	chr20	3706581;3706643;3706700	CCTCACTGATCTCGAAGCGG;CCTGAGGCCTGTATCACCC	CCTCACTGATCTCGAAGCGG	CCTGAGGCCTGTATCACCC
SIGLEC10 (screen)	SIGLEC10	screen	3	TGAACCAGTAGCCATAAGCT;ACAGAGATGCACAGGCCCTC;AGAATCTCCCATCCATAGCC	chr19	51417336;51417404;51417456	ACCTCTCGACTCTGGTGGTT;TTGCAGGTTGAGCCTCTGTC	ACCTCTCGACTCTGGTGGTT	TTGCAGGTTGAGCCTCTGTC
SIGLEC11 (screen)	SIGLEC11	screen	2	TTTGAATGGGTGGCAGCTCC;GGAGGGATGTGCCGTTCCCG	chr19	49958741;49958885	CAGCTGTGGAGGGTCTGTG;CTCTCAGTGCCAAACTGGGG	CAGCTGTGGAGGGTCTGTG	CTCTCAGTGCCAAACTGGGG
SIGLEC12 (screen)	SIGLEC12	screen	3	GTAGCCATGAACTGGATCGG;CGGACTTCTGCATTGTCAGC;TGCTGCCACCCCTGCTCTGT	chr19	51501565;51501657;51501698	TCGAGCTGGGTTGTTTGTGG;GAGGTCACCGTTCAGAACCC	TCGAGCTGGGTTGTTTGTGG	GAGGTCACCGTTCAGAACCC
SIGLEC14 (screen)	SIGLEC14	screen	2	CTGAACCCTGAGCTAATAGA;TGAAGAAGATGCTGATGGCG	chr19	51645432;51645512	CTTAGTGACTGGGATTGGGGG;AGGGAAAACTCGTGTGTGGG	CTTAGTGACTGGGATTGGGGG	AGGGAAAACTCGTGTGTGGG
SIGLEC15 (screen)	SIGLEC15	screen	3	ACCGAGATGTTGACGATCCG;GGCGGGCGGCGGCTCCCCTT;ACCCTCACGCGGGCTCCGCA	chr18	45838729;45838793;45838856	GTCCAAAGGGCTAAGGGGAG;CCATGGAAGCGGAACAGGTA	GTCCAAAGGGCTAAGGGGAG	CCATGGAAGCGGAACAGGTA
SIGLEC5 (screen)	SIGLEC5	screen	3	AAGCTCCAAGATCCCGGTAT;AGGTGTGCAGGGGGGTTGCT;AGGTGTTTTGCAGGATCTCT	chr19	51627945;51628012;51628085	GCCCCCACACTCACAGTAAA;TGTCATCTGGATCCTGGGAAGG	GCCCCCACACTCACAGTAAA	TGTCATCTGGATCCTGGGAAGG
SIGLEC6 (screen)	SIGLEC6	screen	3	TTCTTCGTCTGGGTCGTTTG;GTAGCCATAACCATAGTACG;GTGACTCTGGCCCCTCCAGC	chr19	51531352;51531406;51531489	GTATGCAGCATTGTCCCTCCT;CGCCTCAGAGATGCTACCG	GTATGCAGCATTGTCCCTCCT	CGCCTCAGAGATGCTACCG
SIGLEC7 (screen)	SIGLEC7	screen	3	AGGACAGAAGAGTAACCGGA;GACACACATGCCCTCTTGCA;GGGCAGGGAATGATATAAGC	chr19	51142437;51142479;51142586	TGTTTTGACCTCACCACCGA;AATCGGTCCCGAGTTTCCTC	TGTTTTGACCTCACCACCGA	AATCGGTCCCGAGTTTCCTC
SIGLEC8 (screen)	SIGLEC8	screen	3	CTGGGGGTAGGAGAAGGAGC;CTTGCTGCAAGTGCAGGAGC;CCCCTTTGTCCCCCAGAGCA	chr19	51458246;51458291;51458357	CCGGAACCAGTAGCCATGAA;ACTTTTCTGACTTCACCCCCA	CCGGAACCAGTAGCCATGAA	ACTTTTCTGACTTCACCCCCA
SIGLEC9 (screen)	SIGLEC9	screen	3	TGAGCCATTTCCCAAGACTG;CTGCATCAACTGCACAGACC;CCGGGTTTGAGGGCTGTGAG	chr19	51127039;51127094;51127172	GCAGTGAGTGGTGAAAGTGTG;GGGAGACGTTCAGGTAGACC	GCAGTGAGTGGTGAAAGTGTG	GGGAGACGTTCAGGTAGACC
SIGLECL1 (screen)	SIGLECL1	screen	3	GCTCAACTCCTCTTGCTCCT;TGGATGGGAGGAGTCCCCGT;GTTAGCCCAGGGGCCAAGCA	chr19	51265398;51265480;51265530	AGGATGCCTTGCTGACTCCT;CCGCTTATTGTCCTCACCCA	AGGATGCCTTGCTGACTCCT	CCGCTTATTGTCCTCACCCA
SIRPA (screen)	SIRPA	screen	3	GAGCCCGCCGGCCCGGCCCC;GTGCTTACCTGACCAGGCGC;CGGGCTCAGGCCTCTCAGAC	chr20	1895468;1895518;1895586	AGCCTTAGTCATTTCCCCGC;CTACCCTTGGCTGTGTGACC	AGCCTTAGTCATTTCCCCGC	CTACCCTTGGCTGTGTGACC
SIRPB1 (screen)	SIRPB1	screen	3	GAAAGTCCAGGGACAGGCCA;CTACTGCTGGGGAGACTCAC;GAATGCCCGTGCCAGCCTCC	chr20	1619819;1619874;1619930	TCGTCCTGTGGTTCAATGCC;GCAGGGCTTGTCTTCTCTCC	TCGTCCTGTGGTTCAATGCC	GCAGGGCTTGTCTTCTCTCC
SOCS1 (screen)	SOCS1	screen	3	GCGGCCGTGCCCCGCGGTCC;AGGAAGGTTCTGGCCGCCGT;TAGGATGGTAGCACACAACC	chr16	11255346;11255417;11255466	CCCCCAGTAGAATCCGCAG;CCTCTTTGTCTCTCCCGCAG	CCCCCAGTAGAATCCGCAG	CCTCTTTGTCTCTCCCGCAG
SOCS3 (screen)	SOCS3	screen	3	CAGCAGGTTCGCCTCGCCGC;GCACTGCGTTCACCACCAGC;CAGGGGGCGGCTCATCCCGG	chr17	78358936;78358998;78359065	GACTGGGTCTTGACGCTGAG;TTCCGGGCACTCAACGC	GACTGGGTCTTGACGCTGAG	TTCCGGGCACTCAACGC
SRC (screen)	SRC	screen	3	CTTGCTCTTGTTGCTACCCA;GCACGTTCTCGGCGGGCTCC;AGCAAGCCAGCCTCGGCCGA	chr20	37384158;37384210;37384285	CCTCGTTTTCCCTATCTGTGGA;AGTTGAAGCCTCCGAACAGC	CCTCGTTTTCCCTATCTGTGGA	AGTTGAAGCCTCCGAACAGC
SSC5D (screen)	SSC5D	screen	3	ACCCTCAGAGCGCCTGCGCC;CGCCATGCCAGACCTCCAGG;AGGCCACGGCGGCATCGCGC	chr19	55489363;55489400;55489457	TCCGAATTCCACTGTGACCT;CCGAAGAAGGCGCCTCC	TCCGAATTCCACTGTGACCT	CCGAAGAAGGCGCCTCC
STAT1 (screen)	STAT1	screen	3	AGTGGTTAGAAAAGCAAGAC;AAAGCTGGTGAACCTGCTCC;TTCCCTATAGGATGTCTCAG	chr2	191009881;191009957;191009998	ACATGGCCCCAAGTCACTTA;CCCCAAACTCAATTAAAAACAGGC	ACATGGCCCCAAGTCACTTA	CCCCAAACTCAATTAAAAACAGGC
STAT2 (screen)	STAT2	screen	3	CCTGAAGGCCTCACCAGTTC;CTCGCACAGCCTCCTGCCTG;CAGAGCCCAAATGGCGCAGT	chr12	56356444;56356490;56356565	ACGGCCACACTCATAGTTCAG;CCAATTGGGAACCCTCATCCTT	ACGGCCACACTCATAGTTCAG	CCAATTGGGAACCCTCATCCTT
SYK (screen)	SYK	screen	3	GGTGATGTTGCCGAAAAAGA;CGCCAGAGCCGCAACTACCT;GCTCCCGCTCGATGGTGTAG	chr9	90843945;90844039;90844090	GTTCTCTGTCTCTGTCTTGCCC;GACCAGGCCATCAGACTCCT	GTTCTCTGTCTCTGTCTTGCCC	GACCAGGCCATCAGACTCCT
TAB1 (screen)	TAB1	screen	3	AGAACAACTGCTTCCTGTAT;CAGCCGCTGGGCCACGAAGT;CACACGCCGCACATCGGCCT	chr22	39415522;39415565;39415628	CTGTCGCTTTAGTCTCCCCC;CGGCAGGATCTTCACACCAA	CTGTCGCTTTAGTCTCCCCC	CGGCAGGATCTTCACACCAA
TAB2 (screen)	TAB2	screen	3	ACTTGAGCTGGTGCTGTCTG;TGCTGAATTTGAAGCACCAG;ATCTGGGAGTTTGTTGAGAA	chr6	149378297;149378355;149378419	GTAGGACTCTAACGCACAGCA;TGTCGAGTTGTACCACCAGG	GTAGGACTCTAACGCACAGCA	TGTCGAGTTGTACCACCAGG
TAB3 (screen)	TAB3	screen	3	GGCTGTTGAGGTGGTTGTGA;CATAAAAAATGGATTGTAGT;TGTTTACCTGCTGCATGCTG	chrX	30855203;30855256;30855335	GCATGTATGAAGGAGGTGGC;TCCTAGTAGCTATCACCCAGGA	GCATGTATGAAGGAGGTGGC	TCCTAGTAGCTATCACCCAGGA
TAS2R9 (screen)	TAS2R9	screen	3	TTGCCAATAATTCAAGTCTC;TTCTTTATGCTGCTCTTTCC;TGACATCATCCTGATCAGCT	chr12	10809788;10809861;10809928	GGACCCCAGAAGAATCGCAA;GTTAACTGCATTGACTGGCTCA	GGACCCCAGAAGAATCGCAA	GTTAACTGCATTGACTGGCTCA
TBK1 (screen)	TBK1	screen	3	ACTGCTCTCTCATACATATC;CAGTTGATCTTTGGAGCATT;CTGCCATTTAGACCCTTTGA	chr12	64474239;64474308;64474361	GCAGGGTCATCAAAACTGAGG;TGCTTCTCTGATTTTAGATCGGGA	GCAGGGTCATCAAAACTGAGG	TGCTTCTCTGATTTTAGATCGGGA
THBD (screen)	THBD	screen	3	CAGTCCGTCGCAGATCTGAC;TCGACGCACTGGCTGCCACC;CGCTGGCCCTGGCCGGCCTG	chr20	23049357;23049427;23049463	GCAAGGAAATGACATCGGCA;GATCCGCATGTCAGAGGCTG	GCAAGGAAATGACATCGGCA	GATCCGCATGTCAGAGGCTG
TICAM1 (screen)	TICAM1	screen	3	GGTGTTTCGGACTGGAGCCA;CCATCCTCGGCTTTGCCCTC;CAGCAATGTCCCACCCACAC	chr19	4817812;4817863;4817947	TGGCTGATTTCCAAGTTGCTG;CCGCTTGTACCACCTGCT	TGGCTGATTTCCAAGTTGCTG	CCGCTTGTACCACCTGCT
TICAM2 (screen)	TICAM2	screen	3	TGAGCACAGCAATACAACAG;GAATCTGACTCATGATATCC;GGATATTTATAATGGGTATC	chr5	115581103;115581173;115581251	AGGAACACCTCTTCTTCAGC;AGCTTCCCAATTATCTGTTTGTC	AGGAACACCTCTTCTTCAGC	AGCTTCCCAATTATCTGTTTGTC
TIFA (screen)	TIFA	screen	3	AATTTCACCACTTCGCTGGA;ATTCCACACTGCAACTGGCC;TGTGTCAGCATCTTCAAAAC	chr4	112278288;112278345;112278407	CTCTCTGCTGTCCACGATCA;GAATCAAAGTTCTCAATGCCTCAAG	CTCTCTGCTGTCCACGATCA	GAATCAAAGTTCTCAATGCCTCAAG
TIRAP (screen)	TIRAP	screen	3	TGCTTCACAGCCTACCTCAC;GTGACAGTGGCAGTAGTCGC;CCAGGTCCTGGGCGGCCACC	chr11	126292564;126292650;126292703	AGTGAGAGGGCACCTGGTAA;GCAGTGCTGCCTTCCAAGTA	AGTGAGAGGGCACCTGGTAA	GCAGTGCTGCCTTCCAAGTA
TLR1 (screen)	TLR1	screen	3	GTTTTCTGGGATAGGTCTTT;AAAGTGAATTTTTAGTTGAT;ATGGAAGATGCTAGTCATTT	chr4	38798709;38798745;38798831	TGTCAGAAGTCCAAAGCTCAGA;ACCCAAAAGAATGTAGCCTCCA	TGTCAGAAGTCCAAAGCTCAGA	ACCCAAAAGAATGTAGCCTCCA
TLR10 (screen)	TLR10	screen	3	TAGAATCAAAACTCTCAGTT;AATCCAGTGTCGTTGTGGCT;CTCCAGAGCTGCCAGAAGAA	chr4	38775371;38775445;38775513	TTCAAAGGTTTTGAGATCCAGCT;GGGTTTTGAGCTCATCTTCATCA	TTCAAAGGTTTTGAGATCCAGCT	GGGTTTTGAGCTCATCTTCATCA
TLR2 (screen)	TLR2	screen	3	ACAAGACAGAGAAGCCTGAT;ACAGCTTCTGTGAGCCCTGA;GGAGGTTCACACACCTCTGT	chr4	153702981;153703052;153703126	ACTTTGTGGATGGTGTGGGT;AAAGGGGCTTGAACCAGGAAG	ACTTTGTGGATGGTGTGGGT	AAAGGGGCTTGAACCAGGAAG
TLR3 (screen)	TLR3	screen	3	TTTTCAGTGGCTAAAATGTT;ATAAAAAGCAATATGTTCAC;TCGCAAACTTGTAAAGGAGT	chr4	186082753;186082811;186082852	CACGGGCTTTTCAATGTGAGG;GCCCAACCAAGAGAAAGCATC	CACGGGCTTTTCAATGTGAGG	GCCCAACCAAGAGAAAGCATC
TLR4 (screen)	TLR4	screen	3	TTAAGGTAGAGAGGTGGCTT;ATAGTCCAGAAAAGGCTCCC;TCTCTAGAGAACTTCCCCAT	chr9	117712434;117712488;117712563	TCCTGCTTGATGTCTTTGCCT;AAGATTGGATAAGATTGTGAGCCA	TCCTGCTTGATGTCTTTGCCT	AAGATTGGATAAGATTGTGAGCCA
TLR5 (screen)	TLR5	screen	3	CTCAGTGGTGTTGAGGACCT;AAAGGCTATTCGGCCATCAA;TAGGATCATGGGAGACCACC	chr1	223112902;223112953;223113022	GGGGAAGGATGAAGCAGTGA;CCAGTGCAATACCTCGAGCT	GGGGAAGGATGAAGCAGTGA	CCAGTGCAATACCTCGAGCT
TLR6 (screen)	TLR6	screen	3	AGACTTTGGTTTTCAGCGGT;TCCGTCGGAGAACTGGATTC;AACAATAGGTTCTTTGTCTT	chr4	38829322;38829398;38829464	AGCTGGATTCTGTTATGGGAAAGT;TGGACTCATATCAAGATGCTCTGA	AGCTGGATTCTGTTATGGGAAAGT	TGGACTCATATCAAGATGCTCTGA
TLR7 (screen)	TLR7	screen	3	TCCTAATTTCCAAACTCCTT;TCCAAAGAACCATGTGATCG;GTGAGGTTCGTGGTGTTCGT	chrX	12885581;12885651;12885704	AGAGAGGCAGCAAATGGGAATT;GTCTGTGAAAGGACGCTGGG	AGAGAGGCAGCAAATGGGAATT	GTCTGTGAAAGGACGCTGGG
TLR8 (screen)	TLR8	screen	3	CAGGAAGTTCCCCAAACGGT;ATAACGAATGAATCATTTCA;GGTGCTGTACATTGGGGTTG	chrX	12919220;12919289;12919331	TGTGAGTTATGCGCCGAAGA;TGGGGTAACTGGTTGTCTTCA	TGTGAGTTATGCGCCGAAGA	TGGGGTAACTGGTTGTCTTCA
TLR9 (screen)	TLR9	screen	3	ACTTGAGGTTGAGATGCCGC;AAAGGCTGGTGACATTGCCA;ACGGCCTGGTGAACTGCAAC	chr3	52224047;52224128;52224181	CTCGATGGTCATGTGGCAGG;GTGGGTGGAGGTAGAGCTG	CTCGATGGTCATGTGGCAGG	GTGGGTGGAGGTAGAGCTG
TMEM173 (screen)	TMEM173	screen	3	TTAACAGCAGTCCCAGCTGC;CCTGCCTGGTGACCCTTTGG;CGGGATGGATGGATGCAGGC	chr5	139481541;139481606;139481689	GGCTAGGCATCAAGGGAGTG;GGCAAGGGGAGAATGGTCAT	GGCTAGGCATCAAGGGAGTG	GGCAAGGGGAGAATGGTCAT
TNF (screen)	TNF	screen	3	GATCATGCTTTCAGTGCTCA;CAAGAAGACAGGGGGGCCCC;GGCGCCTGCCACGATCAGGA	chr6	31575746;31575812;31575857	AAAACAACCCTCAGACGCCA;CTTGCGTCTCCATTTCCCCT	AAAACAACCCTCAGACGCCA	CTTGCGTCTCCATTTCCCCT
TNFAIP3 (screen)	TNFAIP3	screen	3	CTTTGTATTTGAGCAATATG;AACCATGCACCGATACACAC;TGGATGATCTCCCGAAACTG	chr6	137871270;137871367;137871405	AGGCAGCTATAGAGGAGTCGT;TTCGTTTTCAGCGCCACAAG	AGGCAGCTATAGAGGAGTCGT	TTCGTTTTCAGCGCCACAAG
TRAF3 (screen)	TRAF3	screen	3	CACATGGAAGTTCTTCAAAA;GGAGAAGGCGTGTAAATACC;GGTTCCGATGATCGCGCTGC	chr14	102876384;102876470;102876521	ATCCTGGAAGCAGAGTTGACTTA;CCTGTGGAATGGGAGGACCC	ATCCTGGAAGCAGAGTTGACTTA	CCTGTGGAATGGGAGGACCC
TRAF6 (screen)	TRAF6	screen	3	GTTCTTAAATGTGTACTTGA;AATGGCATTTGAAGATAAAG;TCAGAATGTGAATATTAATA	chr11	36497044;36497113;36497193	CTCAGAGTCGGAGTCACATC;GGTTCTGTGGTGTGCATTAGAC	CTCAGAGTCGGAGTCACATC	GGTTCTGTGGTGTGCATTAGAC
TREM1 (screen)	TREM1	screen	3	AGACCCTGGCATGCACAGAG;GTAGTCACATTTCACATCCA;AGCTGCAACTAAATTAACTG	chr6	41282591;41282689;41282728	CATTCGGACGCGCAGTAAAC;GGGGCTCCTCTCCTTTTTCC	CATTCGGACGCGCAGTAAAC	GGGGCTCCTCTCCTTTTTCC
TREM2 (screen)	TREM2	screen	3	TGCTGACCACACGCTGGCAT;CCTATGACTCCATGAAGCAC;CTGGAACACTGTGGTGTTGT	chr6	41161475;41161528;41161596	AGCGTAATGGTGAGAGTGCC;CCATCCGCTCCCAACTTGTA	AGCGTAATGGTGAGAGTGCC	CCATCCGCTCCCAACTTGTA
TRHR (screen)	TRHR	screen	3	CTCGTGGCTGAAGCTGTGTT;GTACTCATTATTTGTGGCCT;CTCACCAGGTAGCAGTTTGT	chr8	109087548;109087623;109087693	GGGCGCTGGAAAGAAGATGT;TGTCTGTTATGTTGGGGAGGC	GGGCGCTGGAAAGAAGATGT	TGTCTGTTATGTTGGGGAGGC
TRIM47 (screen)	TRIM47	screen	3	AGCCGGCGGACCCGGAGGCG;AGACAGAAGTTGTGGCCGCA;CGCGGAGTCATGGACGGCAG	chr17	75878401;75878477;75878541	TCGGACAGCGTGTGGTTCT;CGAACGGCCCGGGTC	TCGGACAGCGTGTGGTTCT	CGAACGGCCCGGGTC
TYROBP (screen)	TYROBP	screen	3	TCCGCAGCCCCTCGCCCCCG;CAATGAGCACTGTCAGCACC;CAGTTGCTCTACGGTGAGCC	chr19	35907465;35907520;35907560	CAGAGTGGTGAGTTGAGGGT;ACACCCTTTCCAAACCTCCC	CAGAGTGGTGAGTTGAGGGT	ACACCCTTTCCAAACCTCCC
U2AF2 (screen)	U2AF2	screen	3	CCCTTGCCCAGAGCGGGACA;TGCGGTCCCGGCTCCGAGAG;GGGAGGCGCTCCGCTGGTCC	chr19	55659216;55659256;55659310	CCGCATCCTTACTCCGCTTA;AAGAACGAACGAGCCACACA	CCGCATCCTTACTCCGCTTA	AAGAACGAACGAGCCACACA
UBE2N (screen)	UBE2N	screen	2	GGCGTTGCTCTCATCTGGTT;ATAGGAAACCCAGCGTTTGC	chr12	93411251;93411287	AACGTACTTTAGGGGCTGCC;TCGCTTGCAGTTTCATTCAGC	AACGTACTTTAGGGGCTGCC	TCGCTTGCAGTTTCATTCAGC
UNC93B1 (screen)	UNC93B1	screen	3	TGAGCACAGGTGTGTAGAGC;AGCATTTTGCTGTCGATGTC;GGATCAGCTGCATCTGCAGG	chr11	68003043;68003096;68003169	CCTCTGTACCCCTCCGAAATG;GCCTTCGGTGATTGGAGCTC	CCTCTGTACCCCTCCGAAATG	GCCTTCGGTGATTGGAGCTC
VAV1 (screen)	VAV1	screen	3	CCACAGCGACACGGTGGAGG;GGAAGGCGACGAGATCTATG;CTCCACGTCACGCACCGGCA	chr19	6822232;6822292;6822328	CTGCCCTTGGAGTCTGAGG;GTGTACTTCTCCTCCGTCTGC	CTGCCCTTGGAGTCTGAGG	GTGTACTTCTCCTCCGTCTGC
VCAN (screen)	VCAN	screen	3	CAAATGGTCTAAGATTGAAG;ACTGTCCTTGTGGCCCAAAA;GGGCGATGCCTCCCTCACTG	chr5	83490236;83490288;83490374	GATGCCTACTTTGCCACCCA;GCCTTACCATCCACAGTCAGT	GATGCCTACTTTGCCACCCA	GCCTTACCATCCACAGTCAGT
VSIR (screen)	VSIR	screen	3	GGTCCTGGAACGTGAGGTTG;ACATCGTGCCCTTTGTCCAC;TTCCCTGTATGTCTGTCCCG	chr10	71761837;71761929;71761976	CAGTAGAGGCCGCTATCCAG;TCTCTCTGAGCAGGTCCGG	CAGTAGAGGCCGCTATCCAG	TCTCTCTGAGCAGGTCCGG
ZFP36 (screen)	ZFP36	screen	3	CCTCCATGGTCGGATGGCAC;TCGGAGGGGCTCAGGCTCCA;GGAGGGCCGCAGCTGTGGCT	chr19	39407776;39407833;39407921	GCAAGCTCTAGTTCCCTGCA;CTCAGTCTTGTAGCGCGAGG	GCAAGCTCTAGTTCCCTGCA	CTCAGTCTTGTAGCGCGAGG
ITLN1	ITLN1	validation	3	GTATCAGGATTGTGTCTTCT;GACGAATGTCCTAGTGCATT;CTAATACTTACTTCAAGGAA	chr1	160883375;160883433;160883504	GAGCGTGGGACTAGTGATAGG;CGGCCCCTCCATGTTATTAAGT	GAGCGTGGGACTAGTGATAGG	CGGCCCCTCCATGTTATTAAGT
ITLN2	ITLN2	validation	3	GGCTCTGTTGAGCTAAAAAG;ATTACTCACCACCTGCACTA;CGAGAGCATCTCAAGAGAAG	chr1	160952577;160952628;160952722	CTCCTTGAGTAGGAGCTGGG;CAGCTGTTGGATCAGACCGT	CTCCTTGAGTAGGAGCTGGG	CAGCTGTTGGATCAGACCGT
ADGRB1	ADGRB1	validation	3	GCTGGGACGCCGCGCGCGGG;GGCGTTGGCCGGGAACACGG;ATGTAGAGAGTGTAGCGCCG	chr8	142464284;142464377;142464433	ATGTCAAGACCTGGTCCGC;GAGTCGAACTGGTAGGTGCG	ATGTCAAGACCTGGTCCGC	GAGTCGAACTGGTAGGTGCG
Non-targeting control 1	n/a	screen	1	GCACTACCAGAGCTAACTCA	n/a	n/a	n/a
Non-targeting control 2	n/a	screen	1	GTACGTCGGTATAACTCCTC	n/a	n/a	n/a
