# Supplementary material for: CRISPR-based functional genomics in human dendritic cells
Source: eLife journal article supplement (doi:10.7554/elife.65856), 2021-04-27
Supplement: supp [file elife-65856-supp-v1.zip › elife_poa_e65856_Supplementary_file_2.xlsx]

## Sheet: editing_results_non-screen_for_
			Total reads	WT	simple indel	simple indel	simple indel	complex indel	genomic insertion	uncategorized and malformed layout	solution	pulse
			Total reads	WT	deletion <50 nt	deletion >=50 nt	insertion	multiple indels	hg19	uncategorized and malformed layout
donor	sgRNA	amplified locus
Donor A	AAVS1	AAVS1	97552	15136	73259	115	61	0	30	8951	P1	CB-150
Donor A	TLR4	TLR4	313051	253264	14153	0	12401	1	10	33222	P1	CB-150
Donor A	TNF	TNF	101011	13400	76202	118	825	0	1	10465	P1	CB-150
Donor A	AAVS1	AAVS1	120831	21556	87571	1	203	0	44	11456	P1	EH-104
Donor A	TLR4	TLR4	171557	140431	12746	0	2667	0	7	15706	P1	EH-104
Donor A	TNF	TNF	110777	2888	92884	0	419	0	19	14567	P1	EH-104
Donor A	AAVS1	AAVS1	103628	15863	78411	14	71	0	54	9215	P1	EN-150
Donor A	TLR4	TLR4	152972	134496	5153	0	1208	0	8	12107	P1	EN-150
Donor A	TNF	TNF	184836	9131	132816	380	1138	0	195	41176	P1	EN-150
Donor A	AAVS1	AAVS1	120509	17738	91363	0	85	0	35	11288	P1	EW-138
Donor A	TLR4	TLR4	128269	111949	4930	0	1179	0	4	10207	P1	EW-138
Donor A	TNF	TNF	199414	5000	137029	0	825	0	53	56507	P1	EW-138
Donor A	no RNP	AAVS1	299937	277533	105	9	3	0	97	22190	P1	no pulse
Donor A	no RNP	TLR4	269112	224593	38	0	12	0	5	44464	P1	no pulse
Donor A	no RNP	TLR4	184431	169382	25	0	6	0	3	15015	P1	no pulse
Donor A	no RNP	TNF	138294	126784	182	0	1	0	0	11327	P1	no pulse
Donor A	AAVS1	AAVS1	191276	77762	95085	5	41	0	63	18320	P3	CB-150
Donor A	TLR4	TLR4	117643	100832	2160	0	1602	0	9	13040	P3	CB-150
Donor A	TNF	TNF	92198	37238	41487	0	780	0	0	12693	P3	CB-150
Donor A	AAVS1	AAVS1	240548	72462	145101	333	151	0	178	22323	P3	EH-104
Donor A	TLR4	TLR4	69226	54158	6200	80	1952	0	19	6817	P3	EH-104
Donor A	TNF	TNF	81976	7897	60353	87	682	0	97	12860	P3	EH-104
Donor A	AAVS1	AAVS1	190190	68606	102833	5	98	0	81	18567	P3	EN-150
Donor A	TLR4	TLR4	81036	70300	2225	0	911	0	7	7593	P3	EN-150
Donor A	TNF	TNF	84877	24368	46936	2	981	0	34	12556	P3	EN-150
Donor A	no RNP	AAVS1	172210	159588	82	0	0	0	41	12499	P3	no pulse
Donor A	no RNP	TLR4	326436	296689	44	0	6	0	9	29688	P3	no pulse
Donor A	no RNP	TNF	180746	164826	326	0	3	0	1	15590	P3	no pulse
Donor A	no RNP	TNF	197023	171324	227	0	1	0	1	25470	P3	no pulse
Donor B	CXCR4 799	CXCR4	187432	134406	41173.5	63.1748	7528.9	11.1817	643.399	3605.34
Donor B	CXCR4 831	CXCR4	307291	121338	153735	1306.37	23243.2	83.1845	66.1888	7518.58
Donor B	CXCR4 pool	CXCR4	215845	70755	18104.6	114673	4806.51	2592.86	19.3897	4893.7
Donor B	TLR4 575	TLR4	291202	88875	183835	578.715	4426.19	152.165	44.3979	13290.9
Donor B	TLR4 633	TLR4	248328	158424	74714.1	1572.14	3216.51	250.744	22.0406	10128.1
Donor B	TLR4 725	TLR4	368097	305982	42242.4	749.356	7273.36	58.4815	22.3411	11768.8
Donor B	TLR4 pool	TLR4	220783	82955	30750.8	67156	1374.45	28764.5	80.5338	9701.85
Donor B	TNF 126	TNF	354313	225418	105121	204.297	10113	142.589	113.746	13200.4
Donor B	TNF 182	TNF	305767	240406	42756.9	517.554	8120.57	213.548	75.4554	13676.9
Donor B	TNF 300	TNF	356419	339154	7700.67	294.76	1266.54	13.1632	84.4744	7905.35
Donor B	TNF pool	TNF	161790	79606	10349.2	57914.5	1207.89	6408.92	22.9163	6280.94
Donor B	no pulse/no RNP	CXCR4	358028	352508	209.521	20.2671	3.03	0	92.1739	5195.27
Donor B	no pulse/no RNP	TLR4	438720	423943	483.382	26.7243	4.04	2.464	22.9605	14237.1
Donor B	no pulse/no RNP	TNF	360634	344957	794.097	0.3506	4.04	0.8528	6421.14	8456.49
Donor B	pulse/no RNP	CXCR4	242007	237205	110.672	4.376	9.09	0	52	4626.07
Donor B	pulse/no RNP	TLR4	387172	373890	477.804	4.1893	5.05	1.3689	14	12780.1
Donor B	pulse/no RNP	TNF	378946	367858	968.588	0.1788	3.03	0.9803	158.257	9956.5
Donor B	CXCR4 799	CXCR4	222611	102311	85183.1	5.573	27693.5	44.5375	350.231	7023.39
Donor B	CXCR4 831	CXCR4	244086	61356	138357	3692.63	32243.7	53.0414	45.1384	8339.37
Donor B	CXCR4 pool	CXCR4	215473	50535	6276.14	138383	2529.38	10698.2	129.489	6922.53
Donor B	TLR4 575	TLR4	232026	72315	142250	640.449	4267.67	124.656	16.5465	12411.7
Donor B	TLR4 633	TLR4	244251	98213	132882	1324.14	3457.47	137.123	220.707	8016.49
Donor B	TLR4 725	TLR4	137096	40010	79490.4	411.072	11268	95.5582	168.459	5652.51
Donor B	TLR4 pool	TLR4	163935	45892	12030.1	49780.8	584.992	48244.1	7.2061	7395.77
Donor B	TNF 126	TNF	175747	69741	91545.6	9.4363	7639.26	173.186	42.1795	6596.25
Donor B	TNF 182	TNF	224710	78548	113270	869.173	23091.6	304.335	164.701	8462.35
Donor B	TNF 300	TNF	166218	71825	76167.3	151.544	7539.69	277.58	93.6495	10163
Donor B	TNF pool	TNF	125904	45726	3902.28	43958.9	1738.7	24756.7	16.1703	5805.47
Donor B	no pulse/no RNP	CXCR4	302610	295990	188.973	8.7481	2.02	0	59.9706	6359.8
Donor B	no pulse/no RNP	TLR4	380741	368308	481.376	11.202	5.05	0.3964	27.9506	11907.5
Donor B	no pulse/no RNP	TNF	326526	319427	829.976	0	3.03	0	73.5685	6192.02
Donor B	pulse/no RNP	CXCR4	220738	217347	120.656	7.8523	0	0	57.0762	3205.46
Donor B	pulse/no RNP	TLR4	345144	333406	441.641	7.1865	4.04	1.7201	24.9409	11258.3
Donor B	pulse/no RNP	TNF	312795	302539	783.954	0.7134	1.01	0.9803	66.2199	9403.54
Donor C	IFNB1	IFNB1	288368	8229	2075.96	137184	549.421	107996	437.322	31895.9
Donor C	IRF3	IRF3	309304	31504	30750.5	140932	2127.57	47876.5	901.209	55211.5
Donor C	MYD88	MYD88	302572	1553	633.275	160731	50.5103	121315	444.045	17845
Donor C	NTC	IFNB1	474201	446789	192.747	48.244	4.0501	21.2075	18.297	27127.3
Donor C	NTC	IRF3	348206	265171	675.759	1.119	3.03	0	42.5947	82312.6
Donor C	NTC	MYD88	549560	486637	376.758	5.6358	2.02	0	48.5114	62490.3
Donor C	NTC	RPE65	269591	213067	1268.77	1088.28	7.07	1.9509	77.0709	54081.2
Donor C	NTC	TICAM1	504028	405968	319.538	6.565	5.05	0.7759	37.249	97690.4
Donor C	NTC	TLR4	197056	137660	1121.19	25.0123	16.16	8.3724	46.0448	58179.7
Donor C	NTC	TNF	385845	321524	1475.4	11.8117	32.32	4.0039	92.6937	62704.4
Donor C	RPE65	RPE65	229630	33696	24646.7	102659	967.227	27738.2	77.8163	39844.5
Donor C	TICAM1	TICAM1	271208	29025	24907.3	116404	2593.85	53609.2	164.867	44503.7
Donor C	TLR4	TLR4	111394	221	115.635	49968.1	3.0502	37369.7	275.611	23440.7
Donor C	TNF	TNF	244287	1926	22103.1	104692	373.66	85703.5	403.932	29084.9
Donor D	IFNB1	IFNB1	333988	21192	8427.42	168534	3813.16	95802.5	325.705	35893
Donor D	IRF3	IRF3	300790	30556	26114.4	138989	3226.26	44850.4	293.654	56760
Donor D	MYD88	MYD88	301988	7009	1360.86	152626	412.111	119607	943.693	20029.3
Donor D	NTC	IFNB1	509663	480840	168.695	36.5566	5.05	18.6234	41.01	28552.8
Donor D	NTC	IRF3	385408	301977	691.502	1.3662	5.05	0.9803	44.0723	82687.6
Donor D	NTC	MYD88	498005	447016	393.521	6.7129	3.03	0.5083	34.9799	50549.9
Donor D	NTC	RPE65	266286	209975	474.101	3243.97	9.09	403.522	78.2689	52102.1
Donor D	NTC	TICAM1	458876	372741	449.638	6.7405	6.05	1.2905	18.0837	85652.9
Donor D	NTC	TLR4	240197	168223	1211.18	11.8737	12.12	3.7491	77.3408	70657.9
Donor D	NTC	TNF	396090	332597	1648.85	8.4238	36.36	1.5556	92.8846	61704.4
Donor D	RPE65	RPE65	196422	30891	20240.9	88202.7	591.446	24069.6	166.092	32260.3
Donor D	TICAM1	TICAM1	254560	22324	19440.9	116078	1028.52	52774.9	550.982	42363.6
Donor D	TLR4	TLR4	104314	991	542.899	48151.4	28.3507	32010.1	312.924	22276.9
Donor D	TNF	TNF	258227	3607	12582.4	118638	727.16	95853.3	369.249	26449.4
Donor J	ADGRB1	ADGRB1	39391.5	2894	3127.88	21954.8	160.671	6624.42	3.1481	4626.56
Donor J	ALCAM	ALCAM	36567	201	10136.3	13136.1	600.324	4259.15	40.7534	8193.32
Donor J	ALPK1	ALPK1	63894.4	3341	3273.67	36776.8	428.231	12421.6	21.413	7631.7
Donor J	CARD9	CARD9	55118.9	3778	4124.14	32067.7	518.535	9717.96	133.851	4778.71
Donor J	CD14	CD14	59992.3	221	271.529	39190.5	31.3	16172.7	132.689	3972.54
Donor J	CD69	CD69	85906.4	109	261.801	44324.7	2.02	35987.2	133.151	5088.51
Donor J	CLEC16A	CLEC16A	107543	5802	38312.6	36117.1	239.017	17813	82.4847	9177.15
Donor J	CLEC1A	CLEC1A	86842.9	10582	41028	19142.3	740.654	8163.45	32.5701	7153.83
Donor J	CLEC20A	CLEC20A	58632.8	907	657.308	37181.2	99.0406	16262.3	33.3445	3492.54
Donor J	CLEC2D	CLEC2D	18814.4	0	6.4295	4895.2	0	2146.67	19.2023	11746.9
Donor J	CLEC3B	CLEC3B	57104.5	91	18293.4	10997.9	91.9	17175.6	100.429	10354.2
Donor J	CLEC4A	CLEC4A	93048.3	4838	5199.84	56404.6	546.582	21891.9	48.1828	4119.14
Donor J	CLEC4C	CLEC4C	104992	555	774.417	46620.7	55.54	51021.3	68.2827	5897.26
Donor J	CLEC4E	CLEC4E	100284	1675	6479.46	54175.4	186.931	33553	88.7888	4125.71
Donor J	CLEC7A	CLEC7A	124024	505	398.21	52314.3	72.7402	61145.4	181.204	9406.72
Donor J	CRX	CRX	160189	4474	18789	103475	566.621	22434.5	266.546	10183.2
Donor J	FCER1G	FCER1G	109924	190	681.242	44522.1	29.29	57839.3	168.402	6493.34
Donor J	FCER2	FCER2	75222.3	398	209.423	30535.3	35.35	38093.9	39.5649	5910.77
Donor J	IFNB1	IFNB1	133199	4850	4526.11	76837.2	1577.73	34013.5	167.084	11227.7
Donor J	IL10	IL10	102885	422	2755.64	60050.2	560.895	29618.7	163.887	9313.2
Donor J	IRF3	IRF3	115834	9204	9563.58	68457.7	1141.79	18208.9	311.308	8946.29
Donor J	ITLN1	ITLN1	76979.7	18104	7651.43	28882	2551.05	15628.6	15.8572	4146.84
Donor J	ITLN2	ITLN2	101015	756	1018.87	56071.4	146.45	37193.1	178.77	5650.33
Donor J	JUN	JUN	102960	5197	17498.9	38419.2	119.22	35303.3	385.729	6036.58
Donor J	LAYN	LAYN	168233	19450	40277.2	74153	3231.04	23864.2	120.448	7136.89
Donor J	LGALS8	LGALS8	119899	3577	23214.2	58127	118.21	27682.7	162.216	7017.56
Donor J	LGALS9B	LGALS9B	162822	120802	30959.6	71.3999	3214.28	0	48.2035	7726.34
Donor J	LY75	LY75	66383.1	387	441.922	43431.1	82.9008	16055.1	54.2533	5930.8
Donor J	LY96	LY96	92468.1	3075	5217.1	25341.7	83.9008	51330.8	122.709	7296.9
Donor J	MYD88	MYD88	60612.8	33	37.5203	30980.8	3.03	24260.3	58.0307	5240.17
Donor J	OR2D2	OR2D2	121902	21725	64208	16297.7	943.624	10908	46.1662	7773.93
Donor J	PTPN6	PTPN6	124415	692	23913.3	22266.3	4.04	65320.9	177.578	12040.9
Donor J	RAF1	RAF1	112433	1916	27406	34665.9	137.37	40220.6	77.8773	8009.73
Donor J	RELA	RELA	62028	4858	7682.71	31466.5	23.2401	12587.6	52.4892	5357.5
Donor J	RPE65	RPE65	65528.1	8478	8112.2	33257.1	325.261	10365.8	52.8213	4936.94
Donor J	SIGLEC8	SIGLEC8	56429.3	3651	4833.61	14977.2	186.85	23151	61.2884	9568.33
Donor J	SYK	SYK	78573.7	1445	3672.15	32733.7	109.151	27416	87.4305	13110.3
Donor J	TICAM1	TICAM1	126205	11250	10231	73152.8	1030.68	23859.1	138.015	6543.26
Donor J	TIRAP	TIRAP	85059.2	520	1580.33	39230.7	84.8502	34265.8	149.509	9228.06
Donor J	TLR2	TLR2	66951	617	531.439	39086.1	51.5202	21575.6	45.3703	5044
Donor J	TLR4	TLR4	50020.8	568	333.43	22726.1	27.2902	18434.7	109.557	7821.68
Donor J	TNF	TNF	81447.5	1346	6235.38	35807.9	266.61	27409.2	329.584	10052.7
Donor K	ADGRB1	ADGRB1	40564	2840	2350.81	24291.5	223.535	5158.75	62.7097	5636.68
Donor K	ALCAM	ALCAM	81319.7	1581	25155.9	30586	1743.86	10094.9	543.261	11614.8
Donor K	ALPK1	ALPK1	57613	4223	3229.5	32062.5	414.13	9194.1	75.3947	8414.39
Donor K	CARD9	CARD9	57880.5	7787	4183.23	32095.7	768.712	8045.81	51.8855	4948.16
Donor K	CD14	CD14	71997.4	289	90.7393	49127.2	3.03	16373.5	475.933	5637.88
Donor K	CD69	CD69	95794.8	321	370.318	47627.2	7.07	41287.6	246.407	5935.26
Donor K	CLEC16A	CLEC16A	142220	2503	47656	56309.7	217.423	25096.3	402.489	10034.8
Donor K	CLEC1A	CLEC1A	83481.8	2129	39231.1	23267.2	126.27	11041.5	115.224	7571.59
Donor K	CLEC20A	CLEC20A	48289.6	1761	502.129	32211.5	16.1802	10168	24.467	3606.33
Donor K	CLEC2D	CLEC2D	13751.9	6	2.9317	5798.38	0	1994.23	7.6856	5942.62
Donor K	CLEC3B	CLEC3B	62892.5	520	19386.9	13616.3	130.28	18108.5	303.84	10826.7
Donor K	CLEC4A	CLEC4A	91288.7	4066	3087.85	58785.2	421.18	21004	83.9509	3840.46
Donor K	CLEC4C	CLEC4C	98326.1	555	606.445	48476.2	19.19	42299.3	248.913	6120.97
Donor K	CLEC4E	CLEC4E	136389	12512	16277.2	68873.9	396.95	32901.7	177.842	5249.46
Donor K	CLEC7A	CLEC7A	130930	1976	1362.55	59078.2	158.59	61130.4	289.743	6934.61
Donor K	CRX	CRX	146211	7823	16692.7	93043.1	607.132	15784.7	451.3	11808.6
Donor K	FCER1G	FCER1G	117991	740	1792.23	49171.5	110.08	59117.9	274.576	6784.28
Donor K	FCER2	FCER2	69674.3	928	288.577	27100.8	45.44	35071.8	236.092	6003.59
Donor K	IFNB1	IFNB1	141613	4042	1989.18	81849.1	699.305	39100	189.837	13743.1
Donor K	IL10	IL10	107581	3581	6644.26	59136.9	818.98	26534.5	388.351	10477
Donor K	IRF3	IRF3	125474	11703	7359.52	72993.3	1184.45	19516.2	323.615	12394.3
Donor K	ITLN1	ITLN1	67942.3	7973	5140	32644.1	1919.26	16173.6	83.203	4009.15
Donor K	ITLN2	ITLN2	109385	5276	1988.67	65386.5	353.622	29895	198.673	6286.34
Donor K	JUN	JUN	82764.9	567	12201.3	36965	86.8704	28317.5	216.305	4411
Donor K	LAYN	LAYN	167994	32924	29130.4	74093.8	3582.57	19285.5	150.374	8827.72
Donor K	LGALS8	LGALS8	118970	4760	18002.8	65669.2	48.4901	21913.4	357.023	8218.65
Donor K	LGALS9B	LGALS9B	240430	169480	47792.8	0	11574.6	0	292.047	11291
Donor K	LY75	LY75	81695.3	1217	400.79	50639.1	179.79	21274.7	133.619	7850.31
Donor K	LY96	LY96	70617.2	601	1271.02	21688.4	46.4701	36954.9	167.843	9887.6
Donor K	MYD88	MYD88	62944.8	118	35.8861	34686	5.04	21756.8	118.702	6224.35
Donor K	OR2D2	OR2D2	156028	53082	60374.7	22204.8	1230.48	9432.52	111.656	9591.72
Donor K	PTPN6	PTPN6	142649	209	30198	26851.4	34.34	70183	423.263	14750.3
Donor K	RAF1	RAF1	78797.9	227	13045.6	36021.4	43.4401	24232.5	3.9348	5224
Donor K	RELA	RELA	70907.4	1030	7716.93	41410.9	21.2201	14615.4	268.103	5844.87
Donor K	RPE65	RPE65	62902.8	6690	5066.82	34762	293.88	10585.3	46.717	5458.01
Donor K	SIGLEC8	SIGLEC8	64496.8	2475	4178.74	22523.4	268.66	21512.4	73.6703	13465
Donor K	SYK	SYK	87459.6	1072	2343.25	36749.9	108.08	34984.1	126.477	12075.9
Donor K	TICAM1	TICAM1	130788	7133	6933.27	79306.8	763.904	30051.2	300.017	6299.27
Donor K	TIRAP	TIRAP	91098.3	1801	1479.45	46347.9	137.34	30792.3	253.733	10286.6
Donor K	TLR2	TLR2	55572	900	594.723	35282.8	45.45	13555.5	88.4709	5104.98
Donor K	TLR4	TLR4	53952.6	572	247.234	26716.9	34.6026	19121.2	154.339	7106.3
Donor K	TNF	TNF	72157.5	1268	3490.32	34686.8	297.92	22621.6	126.569	9666.29
Donor L	CXCR4 (Brunello)	CXCR4	470576	14805	435841	2831	4839	137	59	12064	P1	CB128
Donor L	TLR4_725	TLR4	215162	15591	124809	9190	22379	262	4636	38295	P1	CB128
Donor L	TNF (Brunello)	TNF	305991	9907	209474	880	1628	8	46	84048	P1	CB128
Donor L	CXCR4 (Brunello)	CXCR4	503070	19769	461590	856	6761	29	88	13977	P1	CB141
Donor L	TLR4_725	TLR4	180891	8842	109881	1152	16698	180	3818	40320	P1	CB141
Donor L	TNF (Brunello)	TNF	288586	9049	185734	1	1287	8	44	92463	P1	CB141
Donor L	CXCR4 (Brunello)	CXCR4	476870	14653	445288	2494	4683	21	200	9531	P1	CB145
Donor L	TLR4_725	TLR4	220381	11869	141178	9411	23715	210	4778	29220	P1	CB145
Donor L	TNF (Brunello)	TNF	275629	7406	178195	1047	1074	5	47	87855	P1	CB145
Donor L	CXCR4 (Brunello)	CXCR4	472101	17070	432646	4452	3488	226	58	14161	P1	CB150
Donor L	TLR4_725	TLR4	168002	13107	92369	2463	18130	108	3472	38353	P1	CB150
Donor L	TNF (Brunello)	TNF	186767	7408	99906	1557	940	6	118	76832	P1	CB150
Donor L	CXCR4 (Brunello)	CXCR4	446896	415586	488	3	2	0	26	30791	P1	no pulse/no RNP
Donor L	TLR4_725	TLR4	172331	150251	206	5	1	0	4630	17238	P1	no pulse/no RNP
Donor L	TNF (Brunello)	TNF	121203	77768	216	0	1	0	10	43208	P1	no pulse/no RNP
Donor L	CXCR4 (Brunello)	CXCR4	488164	1937	464871	4173	7411	24	153	9595	P3	CY108
Donor L	TLR4_725	TLR4	136383	32392	58833	1338	9562	86	2854	31318	P3	CY108
Donor L	TNF (Brunello)	TNF	270074	5601	165965	228	1156	4	34	97086	P3	CY108
Donor L	CXCR4 (Brunello)	CXCR4	439228	2466	406145	7472	7209	153	247	15536	P3	DJ108
Donor L	TLR4_725	TLR4	160968	24945	81433	2423	10212	118	3196	38641	P3	DJ108
Donor L	TNF (Brunello)	TNF	266257	2755	154789	788	1666	8	33	106218	P3	DJ108
Donor L	CXCR4 (Brunello)	CXCR4	464854	1708	433345	1321	8762	14	354	19350	P3	DV100
Donor L	TLR4_725	TLR4	164118	28489	81866	2302	8528	98	3759	39076	P3	DV100
Donor L	TNF (Brunello)	TNF	123394	3900	79185	276	1041	1	39	38952	P3	DV100
Donor L	CXCR4 (Brunello)	CXCR4	494564	2622	462626	1957	9226	108	171	17854	P3	DV101
Donor L	TLR4_725	TLR4	130800	21138	69866	4440	7915	81	2454	24906	P3	DV101
Donor L	TNF (Brunello)	TNF	149106	7569	92164	1317	1203	1	45	46807	P3	DV101
Donor L	CXCR4 (Brunello)	CXCR4	477511	2163	447778	5027	8006	18	208	14311	P3	DV104
Donor L	TLR4_725	TLR4	136997	16472	71016	412	7360	59	2490	39188	P3	DV104
Donor L	TNF (Brunello)	TNF	238367	3001	155665	825	1899	13	109	76855	P3	DV104
Donor L	CXCR4 (Brunello)	CXCR4	477326	1494	442844	3320	7852	18	232	21566	P3	DV108
Donor L	TLR4_725	TLR4	117771	16458	59206	234	5910	60	2239	33664	P3	DV108
Donor L	TNF (Brunello)	TNF	91187	1417	56222	197	469	2	18	32862	P3	DV108
Donor L	CXCR4 (Brunello)	CXCR4	385513	3538	326557	594	6657	11	242	47914	P3	EH100
Donor L	TLR4_725	TLR4	129479	26821	47470	694	6845	64	2303	45282	P3	EH100
Donor L	TNF (Brunello)	TNF	159417	2621	87082	0	1194	48	54	68418	P3	EH100
Donor L	CXCR4 (Brunello)	CXCR4	346896	5277	281088	1168	3256	9	125	55973	P3	EH101
Donor L	TLR4_725	TLR4	73847	6969	34358	30	3307	56	1195	27932	P3	EH101
Donor L	TNF (Brunello)	TNF	132341	5257	65483	539	815	1	17	60229	P3	EH101
Donor L	CXCR4 (Brunello)	CXCR4	395022	1901	334865	2	6482	15	132	51625	P3	EH104
Donor L	TLR4_725	TLR4	152833	21383	82751	9	10080	83	3321	35206	P3	EH104
Donor L	TNF (Brunello)	TNF	167445	4507	77877	491	1300	5	25	83240	P3	EH104
Donor L	CXCR4 (Brunello)	CXCR4	375698	16722	295435	7914	7575	12	50	47990	P3	ER100
Donor L	TLR4_725	TLR4	112693	20103	53145	1684	4106	63	1984	31608	P3	ER100
Donor L	TNF (Brunello)	TNF	104388	1506	52832	0	499	67	13	49471	P3	ER100
Donor L	CXCR4 (Brunello)	CXCR4	461369	414619	304	1	1	0	31	46413	P3	no pulse/no RNP
Donor L	TLR4_725	TLR4	156546	134594	195	3	6	0	4207	17541	P3	no pulse/no RNP
Donor L	TNF (Brunello)	TNF	170418	114465	267	0	0	0	14	55672	P3	no pulse/no RNP
Donor M	CXCR4 (pool)	CXCR4	116195	8470	2164.05	83668.9	1595.8	2633.64	98.0636	17564.3	P1	CB126
Donor M	TLR4 (pool)	TLR4	95357.2	14131	9810.05	37301.1	558.321	13118.9	100.69	20337.1	P1	CB126
Donor M	TNF (Brunello)	TNF	219981	56677	129207	0	4841.43	0	287.269	28968.6	P1	CB126
Donor M	CXCR4 (pool)	CXCR4	102824	12611	1945.09	65871.7	1648.02	2217.57	13.117	18517	P1	CB127
Donor M	TLR4 (pool)	TLR4	103437	20494	10404.1	36027	552.27	11994.6	10.58	23954.2	P1	CB127
Donor M	TNF (Brunello)	TNF	188022	66867	93565.9	0	3640.09	0	25.605	23923.4	P1	CB127
Donor M	CXCR4 (pool)	CXCR4	76554	7861	913.517	55296.9	358.48	774.015	5.3674	11344.7	P1	CB128
Donor M	TLR4 (pool)	TLR4	122485	31958	12804.3	32986.8	547.474	11660.3	166.221	32361.5	P1	CB128
Donor M	TNF (Brunello)	TNF	194782	91438	80300.7	0	2244.58	0	14.7249	20784.5	P1	CB128
Donor M	CXCR4 (pool)	CXCR4	99892.8	4696	2137.18	74513.1	1562.2	3678.85	88.9762	13216.5	P1	CK127
Donor M	TLR4 (pool)	TLR4	119913	23230	14136.5	40534.8	862.596	13764.2	17.0767	27367.4	P1	CK127
Donor M	TNF (Brunello)	TNF	254397	45286	166003	0.639	7854.97	0	125.103	35127.5	P1	CK127
Donor M	CXCR4 (pool)	CXCR4	113920	16805	2979.5	65395.1	2637	1973.35	11.0718	24119.3	P1	CK128
Donor M	TLR4 (pool)	TLR4	141021	31458	19068.7	43191.4	1071.26	12723.9	25.8097	33482.2	P1	CK128
Donor M	TNF (Brunello)	TNF	212277	79807	108517	0	2526.46	0	6.3809	21420.7	P1	CK128
Donor M	CXCR4 (pool)	CXCR4	107762	3854	2107.13	81729.1	1675.46	3841.29	76.1699	14478.7	P1	CT127
Donor M	TLR4 (pool)	TLR4	113365	23328	14686.9	35922.3	752.282	11524	53.1115	27098.8	P1	CT127
Donor M	TNF (Brunello)	TNF	151691	25308	95273.8	0	6064.7	1.0937	102.033	24941.5	P1	CT127
Donor M	CXCR4 (pool)	CXCR4	116134	16964	4141.24	62366.6	3424.29	2998.63	32.5811	26206.6	P1	CT128
Donor M	TLR4 (pool)	TLR4	113538	30813	16315.2	29404.2	769.533	6399.28	10.6969	29826.6	P1	CT128
Donor M	TNF (Brunello)	TNF	245102	74760	133241	13.0263	6300.55	0	881.704	29905.3	P1	CT128
Donor M	CXCR4 (pool)	CXCR4	114276	62435	32.2382	271.203	0	4.1392	22.7971	51510.6	P1	no pulse/no RNP
Donor M	TLR4 (pool)	TLR4	162597	91079	228.557	72.6154	1.01	6.2735	22.4425	71187.4	P1	no pulse/no RNP
Donor M	TNF (Brunello)	TNF	211410	191124	766.602	0	4.2884	0	4.2251	19510.9	P1	no pulse/no RNP
Donor M	CXCR4 (pool)	CXCR4	100252	3172	3186.51	74916.3	2504.46	2592.39	30.4413	13849.9	P3	CP102
Donor M	TLR4 (pool)	TLR4	77082.9	8915	10746.9	31696.2	600.681	10208	16.7208	14899.3	P3	CP102
Donor M	TNF (Brunello)	TNF	290412	48690	203306	0	8254.57	31.9291	544.825	29584.5	P3	CP102
Donor M	CXCR4 (pool)	CXCR4	120863	2301	2813.25	96987.1	1805.58	3179.19	38.8356	13737.9	P3	CP105
Donor M	TLR4 (pool)	TLR4	110617	5421	11326.6	53077	787.633	22926.1	109.966	16968.7	P3	CP105
Donor M	TNF (Brunello)	TNF	267962	41680	185842	78.0807	8060.51	0	20.8635	32280.8	P3	CP105
Donor M	CXCR4 (pool)	CXCR4	121746	2802	2673.71	96880	1994.08	3334.89	99.0284	13962.8	P3	CP107
Donor M	TLR4 (pool)	TLR4	107121	5100	10494.3	49499.8	821.893	24707.9	58.3349	16438.8	P3	CP107
Donor M	TNF (Brunello)	TNF	243711	30619	177990	0	6590.92	0	74.8698	28435.8	P3	CP107
Donor M	CXCR4 (pool)	CXCR4	109289	1537	2099.95	88385.4	1382.81	3395.37	69.711	12418.7	P3	CP108
Donor M	TLR4 (pool)	TLR4	103699	3595	9615.86	49248.1	528.163	26160.2	57.3833	14494.4	P3	CP108
Donor M	TNF (Brunello)	TNF	206785	21298	154634	41.1386	4115.73	0	255.435	26440.9	P3	CP108
Donor M	CXCR4 (pool)	CXCR4	95905.7	1129	1244.54	80638.9	831.703	2528.51	22.3356	9510.73	P3	CP110
Donor M	TLR4 (pool)	TLR4	79165.5	3153	6454.02	36942.9	431.111	20349.5	30.1235	11804.9	P3	CP110
Donor M	TNF (Brunello)	TNF	193613	11031	152120	0	4893.46	1.0406	11.2232	25555.6	P3	CP110
Donor M	CXCR4 (pool)	CXCR4	101734	1201	2483.86	80254	1640.42	3472.03	179.915	12503	P3	CY102
Donor M	TLR4 (pool)	TLR4	96443.8	3889	9876.86	43709.7	627.031	23408.8	143.57	14788.9	P3	CY102
Donor M	TNF (Brunello)	TNF	287277	29939	217197	301.552	9543.64	0	26.6887	30268.9	P3	CY102
Donor M	CXCR4 (pool)	CXCR4	99649.2	276	1410.7	84040.1	820.021	3035.54	36.0585	10030.7	P3	CY105
Donor M	TLR4 (pool)	TLR4	78240.4	2015	4321.1	39226.5	298.9	21739.7	46.4038	10592.8	P3	CY105
Donor M	TNF (Brunello)	TNF	218249	10848	173892	120.338	6174.93	0	31.3433	27182.1	P3	CY105
Donor M	CXCR4 (pool)	CXCR4	102464	770	1380.58	85670.2	732.201	3752.32	78.9821	10080.2	P3	CY107
Donor M	TLR4 (pool)	TLR4	93997.3	3919	7904.81	42614	551.271	24434.3	112.827	14461	P3	CY107
Donor M	TNF (Brunello)	TNF	254474	10261	210777	16.7419	5490.2	0	280.072	27648.5	P3	CY107
Donor M	CXCR4 (pool)	CXCR4	105863	577	1625.01	88981.6	780.631	3225.94	26.2175	10647.1	P3	CY108
Donor M	TLR4 (pool)	TLR4	91648.2	1907	4411.55	46131.3	355.562	25900.5	49.2058	12893.1	P3	CY108
Donor M	TNF (Brunello)	TNF	240617	10979	194042	0	7090.48	0	169.706	28336.1	P3	CY108
Donor M	CXCR4 (pool)	CXCR4	116196	510	1751.34	97094.2	919.797	4065.72	152.731	11702.2	P3	CY110
Donor M	TLR4 (pool)	TLR4	76328.8	2172	5352.38	35733.1	265.742	21751	28.8741	11025.7	P3	CY110
Donor M	TNF (Brunello)	TNF	279324	13855	226272	0	7632.36	0	435.541	31129.6	P3	CY110
Donor M	CXCR4 (pool)	CXCR4	110099	688	1562.05	92175.8	589.781	4005.34	70.0831	11008	P3	DJ102
Donor M	TLR4 (pool)	TLR4	115893	2621	7347.98	55393	377.55	34547.9	77.5523	15528.4	P3	DJ102
Donor M	TNF (Brunello)	TNF	277588	15276	224431	107.352	6183.21	0	221.501	31369.5	P3	DJ102
Donor M	CXCR4 (pool)	CXCR4	109573	384	1419.7	93063.6	671.641	3922.07	36.1328	10076.2	P3	DJ105
Donor M	TLR4 (pool)	TLR4	106655	3796	7510.37	48025.4	648.387	30752	106.048	15817.2	P3	DJ105
Donor M	TNF (Brunello)	TNF	238627	8636	196313	0.602	7513.48	0	493.301	25670.4	P3	DJ105
Donor M	CXCR4 (pool)	CXCR4	107128	685	1692.22	89014.9	840.826	4202.97	87.8435	10604.4	P3	DJ107
Donor M	TLR4 (pool)	TLR4	102241	1660	4148.24	46315.7	215.151	36377.3	139.795	13385.2	P3	DJ107
Donor M	TNF (Brunello)	TNF	214767	11965	171947	0	5279.57	0	244.475	25331.4	P3	DJ107
Donor M	CXCR4 (pool)	CXCR4	119482	185	1128.18	101987	504.103	4805.08	81.4831	10792.1	P3	DJ108
Donor M	TLR4 (pool)	TLR4	107963	1796	4617.4	49076	366.695	38333.1	81.3841	13692.4	P3	DJ108
Donor M	TNF (Brunello)	TNF	259528	11872	208469	0	7775.23	0	190.232	31221.9	P3	DJ108
Donor M	CXCR4 (pool)	CXCR4	111514	284	1073.54	95191.7	457.047	3974.67	125.837	10407.2	P3	DJ110
Donor M	TLR4 (pool)	TLR4	111847	953	2585.45	51452.1	244.532	43570.6	111.678	12929.2	P3	DJ110
Donor M	TNF (Brunello)	TNF	316610	14690	256783	26.313	8270.87	0	309.151	36530.3	P3	DJ110
Donor M	CXCR4 (pool)	CXCR4	130257	72111	30.654	175.027	0	3.7748	22.8818	57914.1	P3	no pulse/no RNP
Donor M	TLR4 (pool)	TLR4	162851	90240	226.406	56.5804	0	3.9723	10.9868	72313.3	P3	no pulse/no RNP
Donor M	TNF (Brunello)	TNF	230519	210377	803.414	0	9.6489	0	8.4501	19320.1	P3	no pulse/no RNP
Donor N	MYD88	MYD88	61351.6	117	10.5022	22924.8	19.141	15104.2	252.979	22923
Donor N	NTC	MYD88	40969.6	36864	30.6539	0	1.01	0	0	4073.9
Donor N	NTC	RAF1	43837.7	35244	13.8516	0.2363	0	0.692	2.9803	8575.98
Donor N	NTC	SYK	50906.3	36049	40.5647	0	1.01	0	2.6945	14813
Donor N	NTC	TLR2	60254	40754	18.7629	0.4772	1.01	0	0.8505	19478.9
Donor N	NTC	TLR4	78064.5	67470	93.0401	0.2248	1.01	0	8.3519	10491.9
Donor N	NTC	TNF	55397.9	36333	80.6545	90.7717	1.01	39.7048	8.6229	18844.1
Donor N	RAF1	RAF1	38004.8	608	7131.81	10650	40.37	11575.8	121.489	7877.32
Donor N	SYK	SYK	67865.2	646	1015.15	12550.6	64.6906	15620	22.7401	37946.1
Donor N	TLR2	TLR2	37225.7	323	184.745	20367.8	11.11	7772.17	30.0054	8536.82
Donor N	TLR4	TLR4	51947.5	1479	1513.85	20154.6	132.391	16748	51.8458	11867.7
Donor N	TNF	TNF	39565.3	542	221.748	16240.9	45.4501	7689.9	36.7706	14788.5
Donor N	no pulse/no RNP	MYD88	87290.2	75610	80.159	0.7398	1.01	0	1.9901	11596.3
Donor N	no pulse/no RNP	RAF1	52290.2	43089	19.7824	0	0	0.6454	4.177	9176.61
Donor N	no pulse/no RNP	SYK	57725.1	39330	44.5447	0	3.03	0	4.2716	18343.3
Donor N	no pulse/no RNP	TLR2	61212	40151	17.7051	1.1884	0	0	6.2152	21035.9
Donor N	no pulse/no RNP	TLR4	88025.8	70199	69.307	0.2248	1.01	0	9.9901	17746.3
Donor N	no pulse/no RNP	TNF	54532.4	37972	78.1983	10.6637	0	3.1445	11.8111	16456.6
Donor O	CD14	CD14	36608.2	319	304.761	25785.1	54.54	7832.07	170.232	2142.43
Donor O	LY96	LY96	71775.6	126	338.949	17579.1	0	47877.8	98.5919	5755.23
Donor O	MYD88	MYD88	46022.9	296	140.821	25881.7	8.1002	16741.5	67.238	2887.5
Donor O	NTC	CD14	40286.3	38384	353.523	0	0	0	5.9901	1542.75
Donor O	NTC	LY96	84867.9	78108	1185.07	0.4942	132.32	1.4602	3	5437.59
Donor O	NTC	MYD88	79608.5	76594	104.833	0.3264	0	0	4	2905.33
Donor O	NTC	RPE65	57814	53242	186.06	2.8121	1.01	0	18.9002	4363.18
Donor O	NTC	TICAM1	93428.3	82137	73.2184	0.522	2.02	0	7.9803	11207.6
Donor O	NTC	TLR4	80575	66674	620.528	4.54	6.06	0.9803	14.9308	13253.9
Donor O	NTC	TNF	76326.7	70379	401.902	0	11.11	0	7.441	5527.3
Donor O	RPE65	RPE65	39178.7	5813	3778.02	21378.2	228.19	4588.92	49.4812	3342.87
Donor O	TICAM1	TICAM1	68531.9	3450	4382.4	36973.3	582.034	13815	205.485	9123.69
Donor O	TLR4	TLR4	39959	81	122.833	18587.2	0	14652.4	114.356	6401.23
Donor O	TNF	TNF	57798.9	239	2249.55	28932	106.212	20550.9	198.938	5522.26
Donor P	CD14	CD14	32000.9	163	287.037	21409.9	60.59	7504.13	121.706	2454.54
Donor P	LY96	LY96	61722.6	1875	3735.72	16467.5	40.4	35244.5	62.8574	4296.62
Donor P	RPE65	RPE65	56231.7	18779	7448.95	20925.6	298.93	4072.01	17.0465	4690.21
Donor P	TLR4	TLR4	50809.6	1613	541.181	23895	28.3305	15380.1	127.43	9224.56
Donor Q	CD14	CD14	34238.4	152	508.436	20873.4	52.51	10488	28.8958	2135.15
Donor Q	LY96	LY96	75281.8	794	3885.89	18680.3	33.3401	46623.1	145.763	5119.41
Donor Q	RPE65	RPE65	40813.3	11705	6996.97	14998.1	319.11	3490.56	34.3625	3269.24
Donor Q	TLR4	TLR4	42567.8	633	387.265	20268.2	31.3102	13011.9	105.604	8130.54
Donor T	B2M	B2M	20293.7	44	244.475	8195.67	5.05	6115.79	12.7084	5676
Donor T	RPE65	RPE65	199234	20040	16088.2	106251	640.704	28844.2	81.9474	27288.4
Donor U	B2M	B2M	11687.8	26	178.979	4731.61	0	3188.21	2.7184	3560.33
Donor U	RPE65	RPE65	249408	34568	23053.6	125200	906.355	36033.1	192.371	29454.9
