# Supplementary material for: CRISPR-based functional genomics in human dendritic cells
Source: eLife journal article supplement (doi:10.7554/elife.65856), 2021-04-27
Supplement: supp [file elife-65856-supp-v1.zip › elife_poa_e65856_Supplementary_file_3.xlsx]

## Sheet: screen_data_combined_for_manusc
Donor				Donor h	Donor h	Donor h	Donor h	Donor h	Donor h	Donor h	Donor h	Donor h	Donor h	Donor i	Donor i	Donor i	Donor i	Donor i	Donor i	Donor i	Donor i	Donor i	Donor i	Donor i	Donor i	Donor i
Measurement				Luminescence (background subtracted)	Luminescence (background subtracted)	Luminescence (background subtracted)	TNF ELISA absorbance (background subtracted)	TNF ELISA absorbance (background subtracted)	TNF ELISA absorbance (normalized to neutral genes)	TNF ELISA absorbance (normalized to neutral genes)	Log2 fold-change (TNF)	Log2 fold-change (TNF)	Log2 fold-change (TNF)	Luminescence (background subtracted)	Luminescence (background subtracted)	Luminescence (background subtracted)	TNF ELISA absorbance (background subtracted)	TNF ELISA absorbance (background subtracted)	IL10 ELISA absorbance (background subtracted)	TNF ELISA absorbance (normalized to neutral genes)	TNF ELISA absorbance (normalized to neutral genes)	IL10 ELISA absorbance (normalized to neutral genes)	Log2 fold-change (TNF)	Log2 fold-change (TNF)	Log2 fold-change (TNF)	Log2 fold-change (IL10)
Replicate				1	2	averaged	1	2	1	2	1	2	average	1	2	averaged	1	2	1	1	2	1	1	2	average	1
plate	well	Gene	category
1	A1	OR2D2	Neutral control	1.91913e+06	2.31675e+06	2.11794e+06	0.7237	0.9626	0.676747	0.861168	-0.563312	-0.215633	-0.389473	932258	992639	962448	0.14625	0.15065	0.03165	1.14095	1.32908	1.1958	0.190233	0.410432	0.300333	0.257975
1	A2	CD300C	Targeted gene	1.43872e+06	1.96064e+06	1.69968e+06	0.7408	0.6782	0.863207	0.756043	-0.212221	-0.40346	-0.30784	1.09533e+06	1.30324e+06	1.19929e+06	0.18995	0.21355	0.04555	1.18922	1.51195	1.38111	0.25002	0.59641	0.423215	0.465825
1	A3	TAS2R9	Neutral control	1.52645e+06	1.51869e+06	1.52257e+06	0.8618	0.9402	1.12101	1.17004	0.164803	0.226552	0.195678	1.50793e+06	1.57632e+06	1.54213e+06	0.19725	0.18645	0.04785	0.960383	1.0266	1.1283	-0.0583189	0.0378799	-0.0102195	0.174148
1	A4	U2AF2	Essential control	1.13081e+06	1.08884e+06	1.10982e+06	0.6134	0.6063	1.09464	1.03512	0.130455	0.0497935	0.0901244	840547	825729	833138	0.17945	0.19875	0.04505	1.61724	2.02559	1.96625	0.693532	1.01834	0.855936	0.97545
1	A5	RAF1	Targeted gene	1.13672e+06	1.02185e+06	1.07928e+06	0.4244	0.773	0.778791	1.35706	-0.360692	0.440487	0.0398973	1.11504e+06	1.08969e+06	1.10237e+06	0.15445	0.18575	0.02915	1.05198	1.43075	0.961555	0.0731126	0.51677	0.294941	-0.0565581
1	A6	NLRP2B	Targeted gene	1.39859e+06	1.32271e+06	1.36065e+06	0.7363	0.6942	1.07174	0.966706	0.0999564	-0.0488514	0.0255525	1.40317e+06	1.20443e+06	1.3038e+06	0.16415	0.11725	0.03035	0.945315	0.763593	0.846465	-0.0811327	-0.389124	-0.235128	-0.240477
1	A7	FCN3	Targeted gene	1.28841e+06	1.37198e+06	1.33019e+06	0.6496	0.9426	0.967191	1.34267	-0.0481274	0.425101	0.188487	1.27685e+06	1.44638e+06	1.36162e+06	0.22985	0.16435	0.06145	1.26747	1.02489	1.64108	0.341949	0.0354632	0.188706	0.714643
1	A8	SIGLEC5	Targeted gene	1.25029e+06	1.17292e+06	1.2116e+06	0.5493	0.631	0.897904	0.986789	-0.155366	-0.0191858	-0.087276	1.05725e+06	1.14053e+06	1.09889e+06	0.18075	0.17195	0.03005	1.23501	1.32864	0.994378	0.304523	0.409952	0.357238	-0.00813396
1	A9	KLRK1	Targeted gene	1.17625e+06	1.17776e+06	1.177e+06	0.5596	0.6218	0.941632	1.00099	-0.0867654	0.00142392	-0.0426707	1.11433e+06	1.16179e+06	1.13806e+06	0.21045	0.19015	0.03325	1.38845	1.4187	1.0624	0.473476	0.504572	0.489024	0.0873256
1	A10	CLEC18B	Targeted gene	1.21465e+06	1.31556e+06	1.2651e+06	0.5781	0.7684	0.905019	1.15085	-0.143979	0.202694	0.0293573	1.01422e+06	1.08992e+06	1.05207e+06	0.16635	0.19375	0.03055	1.1872	1.56371	1.05591	0.247566	0.644976	0.446271	0.0784893
1	A11	IKBKG	Targeted gene	1.12413e+06	1.2048e+06	1.16446e+06	0.3212	0.3358	0.546299	0.5464	-0.872236	-0.871971	-0.872104	819397	901844	860620	0.15005	0.12705	0.01355	1.3091	1.2535	0.572519	0.388572	0.32596	0.357266	-0.804605
1	A12	pulse/no RNP	No RNP control	1.44805e+06	1.5944e+06	1.52122e+06	0.8534	1.5904	1.11107	1.98093	0.151947	0.986177	0.569062	599583	675468	637525	0.08605	0.09495	0.01045	1.01345	1.26461	0.596047	0.0192695	0.338698	0.178984	-0.746502
1	B1	ZFP36	Targeted gene	2.25617e+06	2.22205e+06	2.23911e+06	1.2655	1.4459	1.11936	1.22354	0.162668	0.291063	0.226865	757028	841239	799133	0.34605	0.33755	0.02305	3.25137	3.58657	1.04885	1.70105	1.84261	1.77183	0.068809
1	B2	OR51T1	Neutral control	1.99875e+06	2.1208e+06	2.05977e+06	0.8434	0.8148	0.810952	0.749527	-0.302312	-0.415948	-0.35913	847949	958607	903278	0.11575	0.11195	0.02625	0.962159	1.05236	1.05674	-0.0556523	0.0736253	0.0089865	0.0796258
1	B3	NCAN	Targeted gene	2.11857e+06	2.10826e+06	2.11341e+06	0.8964	0.9504	0.840037	0.852074	-0.251476	-0.230949	-0.241212	1.18268e+06	1.31652e+06	1.2496e+06	0.13525	0.14485	0.03375	0.812668	0.984255	0.982119	-0.299263	-0.0228962	-0.161079	-0.0260304
1	B4	SIGLEC6	Targeted gene	1.87845e+06	1.91257e+06	1.89551e+06	0.8583	0.863	0.896797	0.862662	-0.157146	-0.213133	-0.18514	862364	934245	898304	0.10515	0.12905	0.01865	0.878887	1.21982	0.754948	-0.18625	0.286667	0.0502082	-0.40555
1	B5	KSR1	Targeted gene	1.36851e+06	1.41396e+06	1.39123e+06	0.8108	0.9086	1.15424	1.23745	0.206939	0.307372	0.257155	1.72924e+06	1.67271e+06	1.70098e+06	0.17465	0.17115	0.05235	0.770935	0.854357	1.11913	-0.37532	-0.22709	-0.301205	0.162377
1	B6	Non-targeting control-1	Non-targeting control	1.65811e+06	1.66585e+06	1.66198e+06	0.8969	0.9641	1.06881	1.09914	0.0960023	0.136373	0.116187	1.50098e+06	2.15865e+06	1.82982e+06	0.13175	0.12695	0.02465	0.540618	0.589096	0.489859	-0.887319	-0.763426	-0.825373	-1.02956
1	B7	CLEC12A	Targeted gene	1.37871e+06	1.45943e+06	1.41907e+06	0.7358	0.7727	1.02692	1.03172	0.0383265	0.0450558	0.0416911	1.40909e+06	1.64013e+06	1.52461e+06	0.18315	0.13565	0.04785	0.901976	0.755477	1.14126	-0.148839	-0.40454	-0.27669	0.190628
1	B8	NFKB1	Targeted gene	1.32528e+06	2.0355e+06	1.68039e+06	0.797	0.8113	0.939355	0.914802	-0.0902582	-0.128468	-0.109363	1.62458e+06	1.78412e+06	1.70435e+06	0.17975	0.15825	0.01355	0.791876	0.788397	0.289096	-0.336654	-0.343005	-0.33983	-1.79038
1	B9	SFTPD	Targeted gene	1.25166e+06	1.55987e+06	1.40576e+06	0.7368	0.9592	1.03805	1.29286	0.0538762	0.370569	0.212223	1.13965e+06	1.30449e+06	1.22207e+06	0.12565	0.15845	0.01915	0.771992	1.10092	0.569815	-0.373341	0.138711	-0.117315	-0.811435
1	B10	SDC3	Targeted gene	1.30764e+06	1.41148e+06	1.35956e+06	0.683	0.8273	0.994956	1.15298	-0.0072956	0.205364	0.0990342	767026	928615	847820	0.10055	0.10345	0.01595	0.890483	1.03607	0.684099	-0.16734	0.0511157	-0.0581123	-0.547724
1	B11	LGALS7B	Targeted gene	1.42428e+06	1.56676e+06	1.49552e+06	0.5849	0.6383	0.774588	0.808702	-0.368499	-0.306319	-0.337409	1.42149e+06	1.55536e+06	1.48843e+06	0.14935	0.15255	0.03175	0.753399	0.870253	0.775672	-0.408514	-0.200494	-0.304504	-0.366481
1	B12	pulse/no RNP	No RNP control	973754	1.65033e+06	1.31204e+06	0.5307	0.8169	0.801092	1.17971	-0.31996	0.238437	-0.0407615	593633	682052	637842	0.06945	0.06795	0.00715	0.817535	0.904559	0.407619	-0.290648	-0.144714	-0.217681	-1.29471
1	C1	RELA	Targeted gene	1.48856e+06	1.56514e+06	1.52685e+06	0.2154	0.2233	0.279403	0.277108	-1.83958	-1.85148	-1.84553	390745	449783	420264	0.01875	0.01685	0.00215	0.334986	0.340438	0.186028	-1.57783	-1.55453	-1.56618	-2.42641
1	C2	IL1RL1	Targeted gene	1.32798e+06	1.64065e+06	1.48431e+06	0.8207	0.7733	1.09506	0.987138	0.131016	-0.018676	0.0561701	671460	1.21559e+06	943526	0.10975	0.08435	0.01625	0.87337	0.759088	0.62627	-0.195336	-0.397662	-0.296499	-0.675143
1	C3	BTK	Targeted gene	1.21679e+06	1.32121e+06	1.269e+06	0.5114	0.4946	0.798143	0.738497	-0.325281	-0.437336	-0.381309	516516	470962	493739	0.06605	0.05305	0.01305	1.00444	0.912323	0.961114	0.00638733	-0.132383	-0.0629979	-0.0572206
1	C4	NLRP10	Targeted gene	1.24555e+06	1.3433e+06	1.29442e+06	0.7162	0.8197	1.09582	1.19987	0.13201	0.262878	0.197444	585217	603830	594523	0.09325	0.08815	0.01635	1.17768	1.25897	1.00003	0.235947	0.332239	0.284093	3.60714e-05
1	C5	NLRP6	Targeted gene	962899	1.00134e+06	982118	0.7719	0.6924	1.5566	1.33582	0.638401	0.417727	0.528064	1.19958e+06	1.27659e+06	1.23809e+06	0.14785	0.14755	0.03485	0.896639	1.01193	1.02356	-0.157401	0.0171041	-0.0701485	0.0335969
1	C6	CLEC6A	Targeted gene	1.01916e+06	1.11216e+06	1.06566e+06	0.5194	0.6277	0.965306	1.11607	-0.0509417	0.158422	0.0537401	1.00481e+06	1.26004e+06	1.13243e+06	0.10245	0.11115	0.02355	0.679281	0.833413	0.75621	-0.557921	-0.262897	-0.410409	-0.403141
1	C7	ATRN	Targeted gene	1.08679e+06	1.25496e+06	1.17087e+06	0.6169	0.6894	1.04348	1.11562	0.0614087	0.157848	0.109628	1.41659e+06	1.67008e+06	1.54334e+06	0.16475	0.14345	0.04645	0.801516	0.789224	1.09443	-0.319197	-0.341492	-0.330345	0.130176
1	C8	IRF7	Targeted gene	910931	920514	915722	0.4832	0.4542	1.04507	0.939807	0.063594	-0.0895641	-0.012985	1.41283e+06	1.45316e+06	1.433e+06	0.13705	0.13205	0.03875	0.718094	0.782445	0.983305	-0.477756	-0.353939	-0.415847	-0.0242887
1	C9	LSP1	Targeted gene	945530	881415	913472	0.5304	0.554	1.14998	1.14913	0.201604	0.200543	0.201073	1.50214e+06	1.65297e+06	1.57756e+06	0.20715	0.17185	0.04245	0.985933	0.924965	0.978486	-0.0204389	-0.11253	-0.0664843	-0.0313769
1	C10	NLRP11	Targeted gene	1.0566e+06	1.2416e+06	1.1491e+06	0.8285	0.615	1.42796	1.01408	0.513956	0.0201758	0.267066	1.3105e+06	1.30685e+06	1.30868e+06	0.11325	0.15185	0.02245	0.64976	0.985242	0.623801	-0.622021	-0.0214493	-0.321735	-0.680843
1	C11	NLRP3	Targeted gene	1.09645e+06	1.11763e+06	1.10704e+06	0.6783	0.4518	1.2135	0.773284	0.279175	-0.370929	-0.0458769	1.1639e+06	1.22703e+06	1.19547e+06	0.13855	0.13485	0.02755	0.870195	0.957798	0.838004	-0.20059	-0.062206	-0.131398	-0.254971
1	C12	no pulse/no RNP	No pulse control	1.29065e+06	1.37746e+06	1.33405e+06	1.1752	0.8204	1.7447	1.16522	0.802975	0.220603	0.511789	923753	990822	957287	0.22155	0.16075	0.02435	1.73771	1.42584	0.92495	0.797186	0.511807	0.654496	-0.112552
1	D1	FCGR1A	Targeted gene	2.25941e+06	1.76691e+06	2.01316e+06	0.8417	0.8192	0.828057	0.771023	-0.272198	-0.375154	-0.323676	594585	882906	738745	0.22825	0.06765	0.01145	2.31987	0.77756	0.563602	1.21404	-0.362975	0.425534	-0.827251
1	D2	KLRG1	Targeted gene	1.90357e+06	1.78387e+06	1.84372e+06	0.867	0.7129	0.931334	0.732638	-0.10263	-0.448827	-0.275728	1.07219e+06	1.27569e+06	1.17394e+06	0.12285	0.13255	0.02185	0.785735	0.958725	0.67681	-0.347886	-0.0608116	-0.204349	-0.563178
1	D3	CLEC4M	Targeted gene	1.53858e+06	1.51063e+06	1.5246e+06	0.8559	0.7516	1.11185	0.934083	0.152965	-0.0983775	0.0272938	1.2365e+06	1.16228e+06	1.19939e+06	0.14075	0.15565	0.02565	0.881119	1.10192	0.777657	-0.182591	0.140015	-0.0212879	-0.362794
1	D4	MARCO	Targeted gene	1.64915e+06	1.65209e+06	1.65062e+06	0.8372	0.8013	1.00453	0.919822	0.0065225	-0.120573	-0.0570251	727221	839966	783593	0.08385	0.09065	0.01655	0.803451	0.982286	0.768014	-0.315717	-0.0257857	-0.170751	-0.380796
1	D5	CREB1	Targeted gene	1.39588e+06	1.4715e+06	1.43369e+06	0.8729	0.8812	1.20584	1.1646	0.270042	0.219829	0.244936	651864	754960	703412	0.12745	0.12915	0.01835	1.36043	1.559	0.948611	0.444067	0.640618	0.542343	-0.0761115
1	D6	SRC	Targeted gene	1.3942e+06	1.37412e+06	1.38416e+06	0.7427	0.6703	1.06269	0.91757	0.0877275	-0.124111	-0.0181916	941323	1.08871e+06	1.01502e+06	0.12075	0.12705	0.02585	0.893225	1.06283	0.926081	-0.162904	0.0879046	-0.0374997	-0.110789
1	D7	NFKB2	Targeted gene	1.40542e+06	1.38751e+06	1.39646e+06	0.8025	0.6463	1.13814	0.87692	0.186681	-0.189482	-0.00140087	1.13096e+06	1.31369e+06	1.22233e+06	0.11555	0.12445	0.03885	0.70979	0.864507	1.15575	-0.494536	-0.210051	-0.352293	0.208835
1	D8	LALBA	Neutral control	1.4588e+06	1.45916e+06	1.45898e+06	0.6744	0.6674	0.915482	0.866748	-0.127397	-0.206315	-0.166856	1.27421e+06	1.49407e+06	1.38414e+06	0.11905	0.13765	0.02585	0.645797	0.844416	0.679113	-0.630847	-0.243975	-0.437411	-0.558277
1	D9	STAT1	Targeted gene	1.5064e+06	1.46477e+06	1.48558e+06	0.8804	0.8198	1.17372	1.0456	0.231086	0.0643338	0.14771	1.08073e+06	1.036e+06	1.05837e+06	0.11425	0.14625	0.01745	0.810527	1.17333	0.599544	-0.303068	0.230609	-0.0362295	-0.738063
1	D10	CHODL	Targeted gene	1.45273e+06	1.62436e+06	1.53854e+06	1.0346	0.9288	1.33181	1.14385	0.413393	0.193894	0.303644	1.2999e+06	1.34544e+06	1.32267e+06	0.12635	0.12255	0.03335	0.71725	0.786723	0.916865	-0.479452	-0.346072	-0.412762	-0.125218
1	D11	F13B	Neutral control	1.39892e+06	1.36422e+06	1.38157e+06	0.8897	0.8588	1.27542	1.17781	0.350969	0.236107	0.293538	1.68489e+06	1.8464e+06	1.76565e+06	0.18165	0.17445	0.04645	0.772465	0.838934	0.956629	-0.372458	-0.253371	-0.312914	-0.0639678
1	D12	no pulse/no RNP	No pulse control	1.13337e+06	1.32318e+06	1.22827e+06	1.233	0.352	1.98815	0.543004	0.991426	-0.880965	0.0552308	1.27744e+06	1.28397e+06	1.28071e+06	0.16045	0.11005	0.05185	0.94067	0.729627	1.47218	-0.0882392	-0.454769	-0.271504	0.557954
1	E1	MB21D1	Targeted gene	1.42907e+06	1.51641e+06	1.47274e+06	0.8306	0.6879	1.11698	0.885024	0.15961	-0.176211	-0.00830067	2.15187e+06	2.38692e+06	2.2694e+06	0.26475	0.25505	0.07575	0.875937	0.95428	1.21376	-0.191101	-0.0675162	-0.129309	0.279488
1	E2	REL	Targeted gene	1.57317e+06	1.5279e+06	1.55053e+06	0.802	0.9388	1.02441	1.14722	0.0347945	0.198145	0.11647	2.53007e+06	3.01391e+06	2.77199e+06	0.49075	0.39225	0.11745	1.32928	1.20152	1.54072	0.410643	0.264863	0.337753	0.623602
1	E3	KLRC3	Targeted gene	1.36163e+06	1.39284e+06	1.37723e+06	0.8158	0.8612	1.17316	1.18482	0.230399	0.244667	0.237533	2.06161e+06	2.04484e+06	2.05323e+06	0.23435	0.17575	0.05245	0.856989	0.726807	0.928903	-0.222651	-0.460356	-0.341503	-0.106399
1	E4	CLEC10A	Targeted gene	1.26291e+06	1.37129e+06	1.3171e+06	0.7707	0.838	1.15891	1.20554	0.212763	0.269679	0.241221	1.83512e+06	1.92386e+06	1.87949e+06	0.29385	0.19795	0.07815	1.1739	0.894285	1.512	0.231315	-0.161194	0.0350603	0.596454
1	E5	CLEC2B	Targeted gene	1.41475e+06	1.59115e+06	1.50295e+06	1.0229	1.1703	1.34794	1.4754	0.430755	0.561102	0.495928	1.61485e+06	1.64035e+06	1.6276e+06	0.24605	0.19075	0.05085	1.13507	0.995124	1.13607	0.182781	-0.00705219	0.0878644	0.18405
1	E6	CEBPB	Targeted gene	1.38692e+06	1.36449e+06	1.3757e+06	0.5544	0.5197	0.798141	0.715786	-0.325285	-0.482399	-0.403842	1.47916e+06	1.60667e+06	1.54292e+06	0.23285	0.15735	0.02225	1.13313	0.865934	0.524384	0.180318	-0.207671	-0.0136764	-0.931304
1	E7	Non-targeting control-2	Non-targeting control	1.64911e+06	1.751e+06	1.70005e+06	1.1022	1.1629	1.28404	1.29609	0.360691	0.374167	0.367429	1.20517e+06	1.41054e+06	1.30786e+06	0.18475	0.14395	0.03055	1.06065	0.934571	0.849401	0.0849471	-0.0976242	-0.00633858	-0.235482
1	E8	TLR1	Targeted gene	1.46249e+06	1.41416e+06	1.43832e+06	0.6539	0.8362	0.900401	1.10156	-0.151361	0.139552	-0.00590484	1.50538e+06	1.63572e+06	1.57055e+06	0.19225	0.16925	0.06145	0.919097	0.915034	1.42276	-0.121711	-0.128103	-0.124907	0.508692
1	E9	SSC5D	Targeted gene	1.36129e+06	1.38308e+06	1.37218e+06	0.9573	0.97	1.38171	1.33941	0.466455	0.421603	0.444029	1.50611e+06	1.70355e+06	1.60483e+06	0.21345	0.20935	0.05095	0.998652	1.10765	1.15445	-0.00194668	0.147507	0.0727804	0.20721
1	E10	KCNV1	Neutral control	1.20483e+06	1.18623e+06	1.19553e+06	0.8277	0.8853	1.37118	1.40309	0.455417	0.48861	0.472013	1.26295e+06	1.39213e+06	1.32754e+06	0.24595	0.16175	0.04775	1.39106	1.03456	1.30794	0.476185	0.049021	0.262603	0.387294
1	E11	PTPN11	Targeted gene	1.13042e+06	1.37231e+06	1.25136e+06	0.5111	0.3811	0.808916	0.577047	-0.305938	-0.79324	-0.549589	2.13497e+06	2.09962e+06	2.1173e+06	0.21115	0.18245	0.06565	0.748784	0.731683	1.1275	-0.417378	-0.45071	-0.434044	0.173122
1	F1	SIGLEC7	Targeted gene	1.83884e+06	1.96016e+06	1.8995e+06	0.8052	0.8864	0.839548	0.884191	-0.252315	-0.177569	-0.214942	844417	858123	851270	0.10095	0.11465	0.01645	0.890402	1.14358	0.702684	-0.16747	0.19356	0.013045	-0.509051
1	F2	MBL2	Targeted gene	1.65893e+06	1.79263e+06	1.72578e+06	0.8833	1.0366	1.01369	1.1381	0.019613	0.186631	0.103122	1.31833e+06	1.60413e+06	1.46123e+06	0.21975	0.15675	0.05875	1.12916	0.910855	1.46201	0.175255	-0.134707	0.0202742	0.547954
1	F3	POLR2A	Essential control	1.62337e+06	1.74237e+06	1.68287e+06	0.6302	0.6521	0.741667	0.734209	-0.431156	-0.445738	-0.438447	2.0794e+06	1.87775e+06	1.97858e+06	0.39395	0.36495	0.07105	1.49498	1.56618	1.30579	0.580127	0.647248	0.613688	0.384922
1	F4	SYK	Targeted gene	1.13919e+06	1.25688e+06	1.19803e+06	0.3895	0.397	0.643902	0.627881	-0.635088	-0.671437	-0.653263	1.7674e+06	1.967e+06	1.8672e+06	0.28205	0.25465	0.07765	1.13418	1.15801	1.51221	0.18165	0.21165	0.19665	0.596659
1	F5	LMAN2	Targeted gene	1.24433e+06	1.35624e+06	1.30028e+06	0.8254	0.8463	1.25721	1.23322	0.330224	0.302435	0.31633	1.39457e+06	1.53009e+06	1.46233e+06	0.15915	0.13475	0.04115	0.817162	0.782426	1.02326	-0.291306	-0.353973	-0.32264	0.033172
1	F6	ARHGEF2	Targeted gene	1.21554e+06	1.33592e+06	1.27573e+06	0.8937	0.8766	1.38744	1.30196	0.472426	0.380689	0.426558	1.60276e+06	1.83349e+06	1.71813e+06	0.22655	0.20125	0.05015	0.990048	0.994584	1.0614	-0.0144298	-0.00783509	-0.0111324	0.0859636
1	F7	TLR9	Targeted gene	1.17181e+06	1.27699e+06	1.2244e+06	0.7994	0.955	1.29307	1.47787	0.370802	0.563519	0.46716	1.57734e+06	1.79134e+06	1.68434e+06	0.33825	0.18905	0.04875	1.50784	0.953031	1.05246	0.592482	-0.0694044	0.261539	0.0737679
1	F8	LY9	Targeted gene	1.31602e+06	1.45961e+06	1.38781e+06	0.8341	0.8878	1.19033	1.2121	0.251364	0.277513	0.264438	1.01168e+06	1.22771e+06	1.1197e+06	0.16555	0.17015	0.02615	1.11014	1.2903	0.849245	0.150736	0.367712	0.259224	-0.235747
1	F9	NLRX1	Targeted gene	1.12954e+06	1.3428e+06	1.23617e+06	0.7734	0.8726	1.2391	1.3375	0.309296	0.419537	0.364417	1.48835e+06	1.59373e+06	1.54104e+06	0.23055	0.20015	0.06085	1.12331	1.10281	1.43585	0.167751	0.141188	0.15447	0.521902
1	F10	TRHR	Neutral control	1.81178e+06	1.69363e+06	1.7527e+06	1.1316	1.1348	1.27869	1.22678	0.354667	0.294876	0.324771	989019	1.13654e+06	1.06278e+06	0.15755	0.11815	0.03165	1.11307	0.943954	1.08291	0.154543	-0.0832113	0.0356661	0.114912
1	F11	MAP3K1	Targeted gene	1.35537e+06	1.51989e+06	1.43763e+06	0.9061	0.8462	1.24828	1.11527	0.319936	0.157399	0.238668	790667	791639	791153	0.08105	0.06665	0.01145	0.769201	0.71532	0.526268	-0.378567	-0.483339	-0.430953	-0.926131
1	G1	SIGLECL1	Targeted gene	1.62127e+06	1.51907e+06	1.57017e+06	0.712	0.7651	0.898079	0.923267	-0.155085	-0.115179	-0.135132	672446	695358	683902	0.02975	0.11605	0.00355	0.326618	1.44083	0.188754	-1.61432	0.526898	-0.543713	-2.40542
1	G2	CD276	Targeted gene	1.81333e+06	1.75362e+06	1.78347e+06	0.9242	0.9888	1.02631	1.0505	0.0374722	0.0710804	0.0542763	988171	1.13746e+06	1.06282e+06	0.15455	0.11825	0.04025	1.09184	0.944721	1.37711	0.126759	-0.0820396	0.0223595	0.461647
1	G3	CASP8	Targeted gene	1.55471e+06	1.51789e+06	1.5363e+06	0.7144	0.7926	0.920973	0.977539	-0.118769	-0.032774	-0.0757718	1.06599e+06	1.01906e+06	1.04253e+06	0.13645	0.10995	0.01955	0.982729	0.895506	0.681901	-0.025135	-0.159224	-0.0921797	-0.552365
1	G4	TNF	Positive control	1.45606e+06	1.54852e+06	1.50229e+06	0.1011	0.0923	0.133284	0.116414	-2.90742	-3.10267	-3.00504	846727	1.01187e+06	929299	0.03205	0.03325	0.03565	0.258952	0.303806	1.39497	-1.94924	-1.71878	-1.83401	0.480237
1	G5	KLRC4	Targeted gene	1.45144e+06	1.36843e+06	1.40993e+06	0.8066	0.7577	1.13303	1.01825	0.180183	0.0260912	0.103137	1.21973e+06	1.31278e+06	1.26626e+06	0.14375	0.14275	0.03545	0.85238	0.957227	1.01802	-0.230431	-0.0630667	-0.146749	0.0257661
1	G6	SOCS3	Targeted gene	1.43629e+06	1.37145e+06	1.40387e+06	0.7316	0.743	1.03212	1.00281	0.0456043	0.00404604	0.0248252	633421	697583	665502	0.05325	0.05735	0.01375	0.600783	0.73172	0.751304	-0.735084	-0.450637	-0.59286	-0.412532
1	G7	ASGR1	Targeted gene	1.36847e+06	1.51603e+06	1.44225e+06	0.7897	0.8156	1.08443	1.0715	0.116942	0.0996336	0.108288	1.32612e+06	1.48466e+06	1.40539e+06	0.19595	0.16525	0.04995	1.04688	0.9984	1.29241	0.0660903	-0.00230961	0.0318904	0.370063
1	G8	DHX58	Targeted gene	1.38573e+06	1.3121e+06	1.34891e+06	0.6463	0.6927	0.948923	0.973009	-0.0756368	-0.0394755	-0.0575561	1.45593e+06	1.56917e+06	1.51255e+06	0.21685	0.19735	0.05325	1.07646	1.10787	1.28018	0.10629	0.147784	0.127037	0.356348
1	G9	LCP2	Targeted gene	1.36091e+06	1.30738e+06	1.33414e+06	0.6669	0.724	0.990009	1.02823	-0.0144863	0.0401675	0.0128406	1.21421e+06	1.28625e+06	1.25023e+06	0.18375	0.13855	0.05295	1.10353	0.940972	1.54006	0.142126	-0.0877763	0.0271747	0.622986
1	G10	MRC1	Targeted gene	1.26193e+06	1.30415e+06	1.28304e+06	0.7471	0.7848	1.15324	1.15898	0.205694	0.212852	0.209273	1.02428e+06	1.02139e+06	1.02284e+06	0.15845	0.09925	0.03455	1.16314	0.82392	1.2283	0.218029	-0.279425	-0.0306979	0.29666
1	G11	LGALS7	Targeted gene	1.4272e+06	1.49352e+06	1.46036e+06	0.7388	0.8174	1.00196	1.06055	0.00281831	0.0848113	0.0438148	1.18161e+06	1.27769e+06	1.22965e+06	0.14335	0.11845	0.03535	0.875312	0.817925	1.04537	-0.192131	-0.289959	-0.241045	0.0640108
1	H1	RPE65	Neutral control	919810	1.09023e+06	1.00502e+06	0.2364	0.2397	0.465858	0.451907	-1.10204	-1.1459	-1.12397	589572	601414	595493	0.07235	0.05875	0.00545	0.91224	0.837707	0.332799	-0.132514	-0.255483	-0.193999	-1.58728
1	H2	LGALS9B	Targeted gene	1.3646e+06	1.37358e+06	1.36909e+06	0.4264	0.4893	0.616832	0.677172	-0.697051	-0.562405	-0.629728	666044	744162	705103	0.11075	0.07185	0.01835	1.17934	0.865237	0.946336	0.237978	-0.208833	0.0145726	-0.0795756
1	H3	TRIM47	Targeted gene	1.50635e+06	1.5377e+06	1.52202e+06	0.8249	0.851	1.0734	1.05941	0.102186	0.08326	0.0927228	640008	576964	608486	0.09425	0.06885	0.00845	1.163	0.960758	0.504973	0.217846	-0.0577546	0.0800457	-0.985722
1	H4	CALM1	Targeted gene	1.14795e+06	1.38424e+06	1.26609e+06	0.7322	0.7865	1.14537	1.17703	0.195811	0.235155	0.215483	850695	941942	896318	0.10445	0.07295	0.02125	0.874971	0.691073	0.862102	-0.192694	-0.533091	-0.362892	-0.21407
1	H5	CLEC20A	Targeted gene	1.33719e+06	1.44972e+06	1.39345e+06	0.6649	0.8254	0.945028	1.12235	-0.0815704	0.16652	0.0424749	1.29455e+06	1.32774e+06	1.31115e+06	0.17155	0.09175	0.03955	0.982396	0.594176	1.09687	-0.0256229	-0.751037	-0.38833	0.133399
1	H6	SIGLEC11	Targeted gene	1.61783e+06	2.18753e+06	1.90268e+06	0.9806	1.0892	1.02072	1.08467	0.0295897	0.117257	0.0734231	766406	898510	832458	0.14425	0.07495	0.02625	1.30107	0.764487	1.14664	0.379699	-0.387436	-0.00386848	0.197418
1	H7	RELB	Targeted gene	1.5138e+06	1.62018e+06	1.56699e+06	1.1213	0.9991	1.41722	1.20809	0.503063	0.272726	0.387894	780438	784063	782250	0.19365	0.09735	0.02075	1.85874	1.0567	0.964571	0.894326	0.0795632	0.486945	-0.0520402
1	H8	CBLB	Targeted gene	1.15065e+06	1.25355e+06	1.2021e+06	0.811	0.8734	1.33617	1.37667	0.418104	0.461179	0.439642	1.33282e+06	1.52606e+06	1.42944e+06	0.19665	0.14355	0.04555	1.03294	0.852702	1.15873	0.0467554	-0.229886	-0.0915653	0.212549
1	H9	TREM2	Targeted gene	1.22097e+06	1.37004e+06	1.2955e+06	0.4817	0.4096	0.736409	0.599069	-0.441421	-0.739206	-0.590313	824485	880936	852710	0.31185	0.10715	0.02795	2.74594	1.06697	1.19191	1.4573	0.0935166	0.775409	0.253271
1	H10	PAK1	Targeted gene	1.35421e+06	1.81007e+06	1.58214e+06	0.6842	0.6416	0.856485	0.768379	-0.223501	-0.38011	-0.301806	1.47485e+06	1.48148e+06	1.47817e+06	0.19305	0.17075	0.05095	0.980604	0.98084	1.25338	-0.0282574	-0.0279108	-0.0280841	0.325823
1	H11	CRX	Neutral control	1.34851e+06	1.46417e+06	1.40634e+06	0.7702	0.8112	1.08466	1.09293	0.117246	0.128205	0.122726	1.24715e+06	1.38244e+06	1.3148e+06	0.19295	0.16915	0.04555	1.10188	1.09238	1.25977	0.139964	0.127476	0.13372	0.333161
2	A1	TIRAP	Targeted gene	1.45777e+06	1.48327e+06	1.47052e+06	0.2334	0.181	0.249088	0.190027	-2.00527	-2.39572	-2.2005	887626	1.0318e+06	959713	0.05365	0.05445	0.00195	0.512821	0.542835	0.07372	-0.963472	-0.881414	-0.922443	-3.7618
2	A2	LY75	Targeted gene	997258	1.05936e+06	1.02831e+06	0.5425	0.4518	0.827941	0.678314	-0.272401	-0.559976	-0.416188	1.06965e+06	1.17637e+06	1.12301e+06	0.10035	0.10545	0.01875	0.819731	0.898409	0.605773	-0.286778	-0.154555	-0.220666	-0.723152
2	A3	RNF216	Targeted gene	884723	964364	924543	0.6441	0.4783	1.09333	0.798697	0.128725	-0.32428	-0.0977774	1.1353e+06	1.33952e+06	1.23741e+06	0.21545	0.15575	0.02945	1.59724	1.20428	0.863503	0.675582	0.268165	0.471874	-0.211727
2	A4	KCNV1	Neutral control	743037	882379	812708	0.4866	0.419	0.939641	0.795955	-0.089819	-0.329242	-0.20953	1.48776e+06	1.53266e+06	1.51021e+06	0.16905	0.12865	0.04445	1.02687	0.815049	1.06789	0.0382534	-0.295041	-0.128394	0.0947627
2	A5	LGALS8	Targeted gene	686427	1.6561e+06	1.17127e+06	0.5021	0.3517	0.672758	0.463581	-0.57184	-1.10911	-0.840473	1.34514e+06	1.48086e+06	1.413e+06	0.20365	0.13285	0.03905	1.32215	0.899561	1.0027	0.402883	-0.152706	0.125088	0.0038895
2	A6	CLEC1A	Targeted gene	569339	663625	616482	0.2107	0.2047	0.536375	0.512633	-0.898687	-0.964002	-0.931345	1.50236e+06	1.41933e+06	1.46084e+06	0.17175	0.14175	0.03565	1.07852	0.92839	0.885416	0.10906	-0.107198	0.000930977	-0.175573
2	A7	TNF	Positive control	672808	698635	685721	0.0409	0.0463	0.0936052	0.104242	-3.41727	-3.26199	-3.33963	1.55015e+06	1.28532e+06	1.41773e+06	0.02845	0.02055	0.03135	0.184088	0.138685	0.802296	-2.44153	-2.85012	-2.64583	-0.317794
2	A8	LGALS3	Targeted gene	646157	1.09836e+06	872261	0.4045	0.4432	0.727774	0.784445	-0.458439	-0.350257	-0.404348	1.41079e+06	1.6321e+06	1.52144e+06	0.15815	0.20405	0.03145	0.953566	1.28319	0.749991	-0.068596	0.359737	0.145571	-0.415054
2	A9	FCN2	Targeted gene	580224	655136	617680	0.2788	0.3063	0.708359	0.765583	-0.497447	-0.385369	-0.441408	1.52687e+06	1.61992e+06	1.57339e+06	0.17365	0.29885	0.04615	1.01245	1.8173	1.06421	0.017854	0.861797	0.439826	0.0897782
2	A10	CD207	Targeted gene	634990	723655	679322	0.2882	0.4093	0.665798	0.930196	-0.586845	-0.104393	-0.345619	1.49056e+06	1.55125e+06	1.5209e+06	0.18835	0.13655	0.03945	1.13606	0.859015	0.941102	0.184039	-0.219244	-0.0176026	-0.0875766
2	A11	TICAM2	Targeted gene	730606	782863	756734	0.1342	0.1784	0.278313	0.363966	-1.84522	-1.45813	-1.65167	1.35918e+06	1.54807e+06	1.45362e+06	0.01545	0.01565	0.00155	0.097502	0.103009	0.0386876	-3.35842	-3.27916	-3.31879	-4.69199
2	A12	pulse/no RNP	No RNP control	666845	852829	759837	0.5081	0.3499	1.04943	0.710939	0.0696043	-0.492202	-0.211299	1.28606e+06	1.56015e+06	1.4231e+06	0.19635	0.23535	0.02685	1.2657	1.5823	0.684541	0.339938	0.662023	0.50098	-0.546791
2	B1	CLEC7A	Targeted gene	1.55795e+06	1.80448e+06	1.68122e+06	0.8698	0.9113	0.811932	0.836848	-0.300569	-0.256963	-0.278766	1.1939e+06	1.40435e+06	1.29912e+06	0.17635	0.14705	0.01935	1.24527	1.08299	0.540408	0.316454	0.115023	0.215739	-0.887879
2	B2	REG4	Targeted gene	1.44995e+06	1.42731e+06	1.43863e+06	0.9369	0.7788	1.02204	0.835767	0.0314506	-0.258828	-0.113689	1.37771e+06	1.54618e+06	1.46194e+06	0.09295	0.28305	0.01795	0.583252	1.85244	0.445477	-0.77781	0.889425	0.0558075	-1.16658
2	B3	CD180	Targeted gene	1.18834e+06	1.34777e+06	1.26806e+06	0.9693	0.7935	1.19962	0.966088	0.262577	-0.0497728	0.106402	1.32838e+06	1.46807e+06	1.39822e+06	0.11055	0.13315	0.01875	0.725303	0.91112	0.486537	-0.463345	-0.134287	-0.298816	-1.03938
2	B4	SIGLEC1	Targeted gene	910081	998748	954414	0.5919	0.5582	0.973275	0.902946	-0.0390807	-0.147288	-0.0931846	1.72642e+06	1.91792e+06	1.82217e+06	0.13045	0.17405	0.03695	0.656739	0.913895	0.735728	-0.606608	-0.129899	-0.368254	-0.442755
2	B5	BIRC2	Targeted gene	1.0553e+06	1.13745e+06	1.09638e+06	0.6238	0.529	0.892914	0.744911	-0.163407	-0.42486	-0.294134	1.64367e+06	2.0439e+06	1.84378e+06	0.15655	0.25595	0.04295	0.778898	1.32818	0.845171	-0.360494	0.409448	0.024477	-0.242684
2	B6	STAT2	Targeted gene	1.10586e+06	1.19013e+06	1.148e+06	0.673	0.6083	0.920022	0.818061	-0.120259	-0.289719	-0.204989	1.60438e+06	1.94482e+06	1.7746e+06	0.12955	0.15745	0.02405	0.669691	0.848894	0.491707	-0.578432	-0.236343	-0.407388	-1.02413
2	B7	OR2D2	Neutral control	1.01724e+06	1.13564e+06	1.07644e+06	0.8532	0.6059	1.2439	0.868999	0.314866	-0.202574	0.056146	1.75994e+06	1.8986e+06	1.82927e+06	0.15775	0.18325	0.03725	0.791096	0.958468	0.738823	-0.338075	-0.061198	-0.199637	-0.436699
2	B8	CRX	Neutral control	804239	1.0015e+06	902872	0.555	0.4243	0.964697	0.725531	-0.051852	-0.462892	-0.257372	1.77141e+06	1.87768e+06	1.82454e+06	0.16195	0.16585	0.03775	0.814262	0.869706	0.750679	-0.296436	-0.201401	-0.248918	-0.413732
2	B9	CLEC2A	Targeted gene	832436	921396	876916	0.5683	0.4702	1.01705	0.827816	0.0243958	-0.272619	-0.124111	1.70299e+06	1.86962e+06	1.7863e+06	0.16605	0.16495	0.03895	0.852748	0.883503	0.791123	-0.229808	-0.178693	-0.20425	-0.338027
2	B10	PTPN6	Targeted gene	1.21242e+06	1.28988e+06	1.25115e+06	1.2929	1.1808	1.62173	1.45705	0.697535	0.543052	0.620294	1.19921e+06	1.45461e+06	1.32691e+06	1.32485	1.38475	0.02175	9.15931	9.98484	0.594716	3.19524	3.31974	3.25749	-0.749727
2	B11	CLEC1B	Targeted gene	971458	1.0621e+06	1.01678e+06	0.6668	0.5135	1.02918	0.77969	0.0414981	-0.359028	-0.158765	1.50934e+06	1.62226e+06	1.5658e+06	0.16015	0.20855	0.02545	0.938271	1.27434	0.589717	-0.0919235	0.34975	0.128913	-0.761906
2	B12	pulse/no RNP	No RNP control	831974	1.02913e+06	930554	0.7457	0.607	1.25761	1.00706	0.330687	0.0101512	0.170419	1.14917e+06	1.33575e+06	1.24246e+06	0.12635	0.15225	0.02185	0.93289	1.17243	0.638059	-0.100221	0.2295	0.0646393	-0.648238
2	C1	ASGR2	Targeted gene	1.811e+06	1.86921e+06	1.84011e+06	1.1808	0.9337	1.00706	0.783381	0.0101564	-0.352214	-0.171029	1.45733e+06	1.67679e+06	1.56706e+06	0.15455	0.15465	0.03075	0.904734	0.944225	0.711953	-0.144434	-0.0827969	-0.113615	-0.490146
2	C2	U2AF2	Essential control	1.48263e+06	1.62878e+06	1.55571e+06	1.0177	1.0309	1.02663	1.02305	0.0379233	0.0328788	0.0354011	1.81435e+06	1.81531e+06	1.81483e+06	0.18255	0.22095	0.05275	0.922749	1.16485	1.05458	-0.11599	0.220142	0.0520761	0.0766649
2	C3	CLEC17A	Targeted gene	1.61544e+06	1.72393e+06	1.66969e+06	1.2732	1.1072	1.1967	1.02376	0.259063	0.033883	0.146473	1.72767e+06	1.97934e+06	1.8535e+06	0.15215	0.26275	0.03845	0.753036	1.35631	0.752652	-0.409209	0.439692	0.0152412	-0.409944
2	C4	CLEC18A	Targeted gene	1.39518e+06	1.56866e+06	1.48192e+06	0.948	0.9357	1.00394	0.97481	0.00567079	-0.0368067	-0.015568	2.51089e+06	2.65872e+06	2.5848e+06	0.22755	0.24765	0.05345	0.807582	0.916689	0.75026	-0.308319	-0.125496	-0.216908	-0.414537
2	C5	CLECL1	Targeted gene	1.19023e+06	1.35955e+06	1.27489e+06	0.9307	1.0138	1.14567	1.22769	0.196194	0.295943	0.246069	1.91137e+06	2.02672e+06	1.96904e+06	0.20985	0.25135	0.05005	0.977667	1.22133	0.922232	-0.032585	0.288458	0.127937	-0.116798
2	C6	TLR3	Targeted gene	1.43625e+06	1.60917e+06	1.52271e+06	1.0197	0.9077	1.05094	0.920308	0.071683	-0.119811	-0.0240639	2.11504e+06	2.32432e+06	2.21968e+06	0.19205	0.21425	0.04215	0.793709	0.92351	0.688968	-0.333317	-0.1148	-0.224058	-0.537491
2	C7	CD1D	Targeted gene	1.26076e+06	1.36706e+06	1.31391e+06	0.924	1.0696	1.10365	1.25679	0.142277	0.329747	0.236012	2.42632e+06	2.37542e+06	2.40087e+06	0.19945	0.23325	0.05265	0.762084	0.929532	0.795649	-0.391978	-0.105423	-0.2487	-0.329796
2	C8	CD14	Targeted gene	1.07438e+06	1.20996e+06	1.14217e+06	0.3759	0.3209	0.516493	0.433757	-0.953178	-1.20504	-1.07911	1.87242e+06	1.96595e+06	1.91918e+06	0.07615	0.07865	0.01535	0.363991	0.392097	0.290191	-1.45803	-1.35072	-1.40437	-1.78493
2	C9	TICAM1	Targeted gene	1.02814e+06	1.16985e+06	1.099e+06	0.3963	0.4496	0.565915	0.631595	-0.821342	-0.662929	-0.742135	1.93744e+06	1.92403e+06	1.93073e+06	0.08165	0.09035	0.01305	0.387946	0.447731	0.245233	-1.36607	-1.1593	-1.26268	-2.02777
2	C10	TLR5	Targeted gene	1.12799e+06	1.26547e+06	1.19673e+06	0.7663	0.8507	1.00491	1.09746	0.00706225	0.134167	0.0706146	1.91979e+06	1.89912e+06	1.90945e+06	0.18855	0.21645	0.03695	0.905847	1.08457	0.702097	-0.142661	0.11713	-0.0127658	-0.510258
2	C11	DGCR2	Targeted gene	1.34083e+06	1.43322e+06	1.38703e+06	0.8001	1.2069	0.905281	1.34337	-0.143562	0.425855	0.141146	1.3609e+06	1.52652e+06	1.44371e+06	0.19095	0.20645	0.02635	1.21333	1.36819	0.662205	0.278966	0.452268	0.365617	-0.59465
2	C12	no pulse/no RNP	No pulse control	1.49961e+06	1.71031e+06	1.60496e+06	1.1896	1.4035	1.16322	1.35007	0.218119	0.433035	0.325577	971405	956427	963916	0.16615	0.18425	0.03875	1.58124	1.82886	1.45856	0.661059	0.870942	0.766001	0.544545
2	D1	IGSF6	Targeted gene	1.49036e+06	1.6459e+06	1.56813e+06	0.5417	0.5625	0.542126	0.553795	-0.8833	-0.852577	-0.867938	997299	1.15734e+06	1.07732e+06	0.11315	0.10445	0.01665	0.963491	0.927631	0.56074	-0.0536569	-0.108377	-0.081017	-0.834596
2	D2	RIPK2	Targeted gene	1.65781e+06	1.73197e+06	1.69489e+06	1.0537	1.2099	0.975661	1.10209	-0.0355478	0.140239	0.0523458	1.26574e+06	1.39565e+06	1.33069e+06	0.16425	0.13595	0.02655	1.13231	0.977489	0.723899	0.179266	-0.0328469	0.0732096	-0.46614
2	D3	NLRP7	Targeted gene	1.38872e+06	1.58493e+06	1.48683e+06	1.0186	0.9532	1.07515	0.989766	0.104532	-0.0148412	0.0448454	1.44376e+06	1.59532e+06	1.51954e+06	0.17585	0.18425	0.03535	1.06162	1.16013	0.844052	0.0862632	0.214287	0.150275	-0.244596
2	D4	CLEC4D	Targeted gene	1.10018e+06	1.25501e+06	1.1776e+06	0.8875	0.9684	1.18276	1.2696	0.242154	0.344374	0.293264	1.99425e+06	2.27631e+06	2.13528e+06	0.18695	0.17925	0.04535	0.803171	0.803185	0.770574	-0.31622	-0.316195	-0.316208	-0.375994
2	D5	MAP3K8	Targeted gene	1.13794e+06	1.25927e+06	1.19861e+06	0.5579	0.462	0.730472	0.595078	-0.453099	-0.748849	-0.600974	1.35394e+06	1.6645e+06	1.50922e+06	0.13675	0.14265	0.02785	0.831213	0.904338	0.669521	-0.26671	-0.145067	-0.205888	-0.578798
2	D6	F13B	Neutral control	956566	1.38345e+06	1.17001e+06	0.743	0.7635	0.996605	1.00746	-0.0049056	0.0107239	0.00290914	1.91184e+06	2.11665e+06	2.01424e+06	0.14275	0.17895	0.03085	0.650132	0.850023	0.555693	-0.621196	-0.234426	-0.427811	-0.84764
2	D7	COLEC12	Targeted gene	1.13245e+06	1.61556e+06	1.37401e+06	0.7743	0.607	0.884391	0.682038	-0.177244	-0.552076	-0.36466	2.01666e+06	2.2527e+06	2.13468e+06	0.36655	0.27665	0.06105	1.57521	1.23996	1.03764	0.655543	0.310299	0.482921	0.0532999
2	D8	FCER1A	Targeted gene	1.14508e+06	1.19386e+06	1.16947e+06	0.6209	0.6148	0.833213	0.81162	-0.263243	-0.301124	-0.282183	2.37986e+06	2.64927e+06	2.51456e+06	0.20885	0.23815	0.06165	0.76192	0.906148	0.889533	-0.392289	-0.142182	-0.267235	-0.16888
2	D9	MRC2	Targeted gene	911143	1.08917e+06	1.00016e+06	0.5562	0.5981	0.872743	0.923238	-0.196372	-0.115226	-0.155799	2.02051e+06	2.10238e+06	2.06144e+06	0.18895	0.21415	0.04965	0.840839	0.993934	0.873855	-0.250099	-0.00877749	-0.129438	-0.194534
2	D10	PIK3CD	Targeted gene	983992	1.20673e+06	1.09536e+06	0.6119	0.7184	0.876691	1.01255	-0.18986	0.0179949	-0.0859326	2.22914e+06	2.39127e+06	2.3102e+06	0.25835	0.23575	0.06815	1.02588	0.976366	1.0703	0.0368586	-0.0345063	0.00117618	0.0980212
2	D11	PIK3CG	Targeted gene	1.09077e+06	1.17387e+06	1.13232e+06	0.4755	0.8019	0.659029	1.09335	-0.601586	0.128755	-0.236416	1.79186e+06	2.05742e+06	1.92464e+06	0.21425	0.21985	0.04805	1.0212	1.09292	0.905807	0.0302591	0.128188	0.0792234	-0.142724
2	D12	no pulse/no RNP	No pulse control	1.21929e+06	1.38493e+06	1.30211e+06	1.313	1.3426	1.58249	1.59187	0.662195	0.670721	0.666458	1.69402e+06	1.85782e+06	1.77592e+06	0.20765	0.17815	0.05495	1.07262	0.959785	1.12263	0.10114	-0.0592174	0.0209612	0.166881
2	E1	CD33	Targeted gene	1.1914e+06	1.36614e+06	1.27877e+06	1.0234	0.8012	1.25596	0.96729	0.328792	-0.04798	0.140406	1.00389e+06	1.21658e+06	1.11023e+06	0.11635	0.38105	0.01985	0.961367	3.28381	0.648691	-0.0568413	1.71537	0.829265	-0.624397
2	E2	CLEC11A	Targeted gene	1.25587e+06	1.46911e+06	1.36249e+06	0.8386	1.0622	0.965928	1.2036	-0.0500118	0.267352	0.10867	1.86814e+06	2.14634e+06	2.00724e+06	0.24985	0.25365	0.07815	1.14187	1.20906	1.41261	0.191402	0.273883	0.232642	0.498361
2	E3	MALT1	Targeted gene	1.0852e+06	1.21133e+06	1.14827e+06	0.8793	0.8749	1.20176	1.17632	0.26515	0.234277	0.249713	1.91068e+06	2.15361e+06	2.03214e+06	0.21885	0.24975	0.06015	0.987937	1.17588	1.07392	-0.0175083	0.233738	0.108115	0.10289
2	E4	RPE65	Neutral control	998056	1.13501e+06	1.06654e+06	0.7463	1.0237	1.09815	1.48186	0.135077	0.567406	0.351242	1.87296e+06	2.17163e+06	2.02229e+06	0.27225	0.26655	0.08625	1.23498	1.26109	1.54741	0.304491	0.334669	0.31958	0.629859
2	E5	KLRC2	Targeted gene	804856	914960	859908	0.5699	0.6697	1.04009	1.20237	0.0567083	0.265878	0.161293	1.87256e+06	2.1069e+06	1.98973e+06	0.21905	0.19585	0.06195	1.00992	0.941761	1.12964	0.0142402	-0.0865667	-0.0361633	0.17586
2	E6	IL1B	Targeted gene	938636	1.01199e+06	975315	0.9942	1.0867	1.59975	1.72018	0.677849	0.782558	0.730204	1.81246e+06	1.90679e+06	1.85962e+06	0.16905	0.19095	0.03155	0.833926	0.982439	0.615554	-0.262009	-0.02556	-0.143785	-0.700044
2	E7	OR51T1	Neutral control	928923	999565	964244	0.6925	0.7912	1.12709	1.2668	0.172598	0.341189	0.256894	1.63618e+06	1.79502e+06	1.7156e+06	0.20505	0.22305	0.04535	1.09643	1.24393	0.959077	0.132815	0.314911	0.223863	-0.0602822
2	E8	CALCOCO2	Targeted gene	883322	991082	937202	0.7448	0.8208	1.24718	1.35211	0.318675	0.435216	0.376945	2.01359e+06	2.37169e+06	2.19264e+06	0.22515	0.25005	0.06505	0.941981	1.09112	1.0764	-0.0862299	0.125804	0.0197873	0.106208
2	E9	LMAN2L	Targeted gene	938389	1.05222e+06	995307	0.8964	1.1935	1.41341	1.85129	0.499183	0.88853	0.693857	1.67045e+06	1.77132e+06	1.72088e+06	0.20465	0.23015	0.05675	1.09093	1.27959	1.19648	0.125561	0.355681	0.240621	0.258798
2	E10	SIRPB1	Targeted gene	1.27042e+06	1.37801e+06	1.32422e+06	0.9456	1.0952	1.12066	1.27686	0.164344	0.3526	0.258472	1.63889e+06	1.72341e+06	1.68115e+06	0.21755	0.21235	0.06185	1.18711	1.20853	1.33483	0.247451	0.273252	0.260352	0.416653
2	E11	LGALS9	Targeted gene	1.06419e+06	1.26896e+06	1.16658e+06	0.7582	0.845	1.01999	1.11828	0.02855	0.161286	0.0949182	1.84873e+06	2.06739e+06	1.95806e+06	0.23855	0.13145	0.06445	1.11761	0.642312	1.19423	0.160419	-0.638654	-0.239117	0.256084
2	F1	ATRNL1	Targeted gene	1.8722e+06	1.33069e+06	1.60145e+06	0.8029	0.6539	0.786816	0.630387	-0.345903	-0.665689	-0.505796	1.79193e+06	2.16516e+06	1.97854e+06	0.16385	0.21725	0.03285	0.759693	1.05057	0.602395	-0.396512	0.0711732	-0.162669	-0.731218
2	F2	NLRP4	Targeted gene	1.86844e+06	1.42764e+06	1.64804e+06	0.8895	0.9554	0.847036	0.895006	-0.239505	-0.160031	-0.199768	1.54841e+06	1.56171e+06	1.55506e+06	0.12845	0.17025	0.02605	0.757748	1.04749	0.607789	-0.400211	0.0669413	-0.166635	-0.718358
2	F3	NLRP9	Targeted gene	976517	1.12683e+06	1.05168e+06	0.8061	0.842	1.2029	1.23606	0.266522	0.305747	0.286135	1.56483e+06	1.73092e+06	1.64787e+06	0.16065	0.16715	0.02505	0.894322	0.970496	0.551538	-0.161133	-0.0432066	-0.10217	-0.858468
2	F4	CARD9	Targeted gene	1.03784e+06	1.10432e+06	1.07108e+06	0.5808	0.5998	0.850997	0.864555	-0.232774	-0.209971	-0.221373	2.53113e+06	2.81215e+06	2.67164e+06	0.25225	0.29455	0.07745	0.866145	1.05485	1.05181	-0.207319	0.0770437	-0.0651375	0.0728679
2	F5	TIFA	Targeted gene	766871	878058	822464	0.6007	0.8206	1.14621	1.54036	0.196873	0.623271	0.410072	2.50545e+06	2.63014e+06	2.56779e+06	0.24675	0.28225	0.06135	0.881524	1.05168	0.866854	-0.181927	0.0727004	-0.0546135	-0.206139
2	F6	POLR2A	Essential control	1.1831e+06	1.13805e+06	1.16058e+06	0.4796	0.5391	0.648529	0.71714	-0.624758	-0.479673	-0.552215	3.11205e+06	3.11288e+06	3.11246e+06	0.40905	0.41285	0.09345	1.20562	1.26911	1.08935	0.269772	0.343817	0.306795	0.123465
2	F7	CLEC18C	Targeted gene	832052	940791	886421	0.8002	0.7492	1.41671	1.30487	0.50255	0.383903	0.443226	2.65214e+06	2.8353e+06	2.74372e+06	0.23885	0.26545	0.06985	0.798588	0.925666	0.923674	-0.324476	-0.111436	-0.217956	-0.114545
2	F8	PRG3	Targeted gene	756830	1.00173e+06	879282	0.8067	0.76	1.43982	1.33442	0.525887	0.416218	0.471053	2.41774e+06	2.72151e+06	2.56962e+06	0.24135	0.24775	0.04535	0.861619	0.922476	0.640324	-0.214879	-0.116416	-0.165647	-0.643127
2	F9	Non-targeting control-2	Non-targeting control	810686	958890	884788	0.5728	0.6766	1.01599	1.1806	0.0228815	0.239517	0.131199	2.34073e+06	2.49608e+06	2.4184e+06	0.19955	0.32985	0.07135	0.756938	1.30496	1.07043	-0.401753	0.384011	-0.008871	0.0981859
2	F10	LGALS12	Targeted gene	846408	783040	814724	0.5411	0.6416	1.0423	1.2158	0.0597656	0.281908	0.170837	2.84192e+06	2.66831e+06	2.75511e+06	0.29435	0.25975	0.07835	0.980081	0.902043	1.03179	-0.0290274	-0.148732	-0.0888797	0.045149
2	F11	CHID1	Targeted gene	690626	801625	746125	0.4178	0.5394	0.878781	1.11611	-0.186424	0.158483	-0.0139708	3.26554e+06	3.32648e+06	3.29601e+06	0.28365	0.24125	0.09885	0.789463	0.70031	1.08813	-0.341056	-0.513935	-0.427496	0.121849
2	G1	NFKBIA	Targeted gene	1.05364e+06	1.05462e+06	1.05413e+06	0.4396	0.4425	0.654465	0.648078	-0.611611	-0.625761	-0.618686	2.10393e+06	2.57201e+06	2.33797e+06	0.13085	0.24295	0.06895	0.513419	0.994236	1.07001	-0.96179	-0.00834012	-0.485065	0.0976225
2	G2	MAP3K14	Targeted gene	1.1184e+06	1.18187e+06	1.15014e+06	0.6619	0.6557	0.903164	0.880166	-0.146939	-0.184153	-0.165546	2.59684e+06	2.69487e+06	2.64585e+06	0.15765	0.18825	0.08705	0.546595	0.680739	1.1937	-0.871456	-0.554827	-0.713142	0.255439
2	G3	CLEC19A	Targeted gene	876798	1.02878e+06	952791	0.552	0.6365	0.909213	1.03136	-0.13731	0.0445453	-0.0463826	2.3846e+06	2.84507e+06	2.61483e+06	0.19005	0.19365	0.05855	0.666747	0.708573	0.812409	-0.584788	-0.497012	-0.5409	-0.299722
2	G4	SDC2	Targeted gene	842037	923298	882667	0.4949	0.7241	0.879923	1.26652	-0.184551	0.340864	0.0781565	2.11206e+06	2.43107e+06	2.27156e+06	0.18995	0.21825	0.06275	0.7671	0.919264	1.00226	-0.382514	-0.121448	-0.251981	0.00325723
2	G5	MAP3K7	Targeted gene	1.05718e+06	1.20499e+06	1.13109e+06	0.5067	0.5738	0.703038	0.783201	-0.508325	-0.352545	-0.430435	2.30701e+06	2.91363e+06	2.61032e+06	0.12475	0.12045	0.03355	0.438414	0.441494	0.466327	-1.18963	-1.17954	-1.18458	-1.10059
2	G6	CHUK	Targeted gene	1.15549e+06	1.18385e+06	1.16967e+06	0.5217	0.7373	0.699972	0.97317	-0.514631	-0.0392357	-0.276933	1.70724e+06	2.01017e+06	1.8587e+06	0.16955	0.18895	0.03645	0.836806	0.97263	0.711507	-0.257035	-0.0400366	-0.148536	-0.491051
2	G7	SOCS1	Targeted gene	971020	865525	918272	0.2932	0.2093	0.501091	0.35189	-0.996855	-1.5068	-1.25183	1.86212e+06	1.90024e+06	1.88118e+06	0.17265	0.17125	0.01705	0.841926	0.870987	0.328841	-0.248235	-0.199277	-0.223756	-1.60454
2	G8	THBD	Targeted gene	990166	996477	993321	0.5606	0.7396	0.885702	1.14952	-0.175107	0.20103	0.0129613	2.34697e+06	2.58694e+06	2.46695e+06	0.21395	0.24315	0.06305	0.795589	0.943028	0.92729	-0.329905	-0.0846281	-0.207267	-0.108907
2	G9	SIGLEC12	Targeted gene	856285	818114	837199	0.4502	0.5537	0.843919	1.02107	-0.244824	0.0300784	-0.107373	1.88424e+06	2.15684e+06	2.02054e+06	0.21185	0.22055	0.06485	0.961831	1.04436	1.16449	-0.0561452	0.0626216	0.00323821	0.219694
2	G10	TRHR	Neutral control	834551	928568	881559	0.4099	0.5788	0.72971	1.01364	-0.454604	0.0195522	-0.217526	1.78052e+06	1.92218e+06	1.85135e+06	0.19705	0.20885	0.05985	0.976395	1.07934	1.17292	-0.0344634	0.110146	0.0378414	0.230102
2	G11	BCAN	Targeted gene	900996	913989	907492	0.6059	0.9186	1.04781	1.56276	0.0673758	0.644096	0.355736	2.34167e+06	2.65686e+06	2.49926e+06	0.24865	0.23185	0.07815	0.91267	0.887577	1.13451	-0.131835	-0.172055	-0.151945	0.18207
2	H1	CD69	Targeted gene	1.07372e+06	1.02236e+06	1.04804e+06	0.3994	0.3807	0.598072	0.560806	-0.741609	-0.834425	-0.788017	1.44219e+06	1.72389e+06	1.58304e+06	0.16395	0.16235	0.03215	0.950073	0.981232	0.736853	-0.0738894	-0.0273336	-0.0506115	-0.44055
2	H2	RIPK1	Targeted gene	1.10245e+06	1.21751e+06	1.15998e+06	0.5573	0.6368	0.753983	0.847541	-0.407395	-0.238645	-0.32302	1.58473e+06	1.64898e+06	1.61685e+06	0.27255	0.11035	0.04525	1.54637	0.652999	1.01541	0.628883	-0.614847	0.00701819	0.0220559
2	H3	UBE2N	Targeted gene	1.34722e+06	1.34753e+06	1.34738e+06	0.7461	0.7241	0.869024	0.829694	-0.202531	-0.269348	-0.23594	2.11561e+06	2.52799e+06	2.3218e+06	0.18385	0.16605	0.04545	0.726401	0.684267	0.710233	-0.461162	-0.547369	-0.504266	-0.493635
2	H4	LY96	Targeted gene	961121	880085	920603	0.2899	0.1907	0.494197	0.319806	-1.01684	-1.64473	-1.33079	1.44295e+06	1.623e+06	1.53297e+06	0.01215	0.01185	0.00155	0.0727074	0.0739596	0.036685	-3.78175	-3.75712	-3.76944	-4.76867
2	H5	LGALS1	Targeted gene	1.17176e+06	1.1722e+06	1.17198e+06	0.6886	0.607	0.922083	0.799607	-0.117031	-0.322637	-0.219834	1.40101e+06	1.54988e+06	1.47544e+06	0.18755	0.13865	0.05045	1.16609	0.899101	1.2406	0.221678	-0.153446	0.034116	0.311033
2	H6	LGALS16	Targeted gene	946373	1.0237e+06	985039	0.5761	0.6672	0.917844	1.04571	-0.12368	0.0644837	-0.029598	1.95597e+06	2.02342e+06	1.98969e+06	0.22075	0.15575	0.06425	1.01778	0.74895	1.1716	0.0254187	-0.417058	-0.19582	0.228477
2	H7	RAC1	Targeted gene	1.16296e+06	1.32405e+06	1.24351e+06	0.7553	0.638	0.953225	0.792102	-0.0691117	-0.336242	-0.202677	1.60132e+06	1.70239e+06	1.65185e+06	0.20675	0.14945	0.05025	1.14818	0.865636	1.10371	0.199353	-0.208167	-0.0044073	0.142365
2	H8	TAS2R9	Neutral control	1.5194e+06	1.52924e+06	1.52432e+06	0.9519	0.8534	0.980028	0.86434	-0.0291045	-0.210329	-0.119717	1.911e+06	2.06517e+06	1.98808e+06	0.23135	0.18025	0.05225	1.06751	0.867465	0.95355	0.0942502	-0.205123	-0.0554366	-0.06862
2	H9	LALBA	Neutral control	1.4057e+06	1.36606e+06	1.38588e+06	0.8126	0.8756	0.920184	0.975412	-0.120006	-0.0359158	-0.0779609	1.60864e+06	1.64644e+06	1.62754e+06	0.23815	0.17945	0.05625	1.34232	1.05493	1.25396	0.42473	0.0771457	0.250938	0.326488
2	H10	Non-targeting control-1	Non-targeting control	1.59414e+06	1.62521e+06	1.60968e+06	1.1227	1.0332	1.09458	0.990956	0.130382	-0.0131068	0.0586378	2.04153e+06	1.88977e+06	1.96565e+06	0.18925	0.18085	0.05455	0.883217	0.880286	1.00689	-0.17916	-0.183956	-0.181558	0.00990098
2	H11	TLR7	Targeted gene	1.5036e+06	1.59398e+06	1.54879e+06	0.8702	1.074	0.881759	1.07058	-0.181543	0.0983954	-0.0415739	2.05045e+06	2.06205e+06	2.05625e+06	0.24405	0.18995	0.06265	1.08878	0.883842	1.10544	0.122714	-0.178139	-0.0277128	0.144627
3	A1	BCL10	Targeted gene	804716	705524	755120	0.2216	0.207	0.405892	0.350276	-1.30083	-1.51344	-1.40713	943856	874345	909100	0.10575	0.08675	0.01735	1.01813	0.955437	0.682469	0.0259248	-0.0657667	-0.019921	-0.551164
3	A2	AKT1	Targeted gene	838876	774434	806655	0.5749	0.8713	0.985738	1.38018	-0.0207244	0.464856	0.222066	1.1391e+06	998451	1.06878e+06	0.13725	0.12525	0.02385	1.12399	1.17337	0.79799	0.168626	0.230661	0.199644	-0.325557
3	A3	COLEC10	Targeted gene	943008	877655	910331	0.4411	0.6094	0.670184	0.855379	-0.57737	-0.225364	-0.401367	1.32007e+06	1.16506e+06	1.24257e+06	0.20575	0.14365	0.04485	1.44929	1.15753	1.29074	0.535348	0.211044	0.373196	0.368196
3	A4	IL10	Targeted gene	617558	573166	595362	0.6262	0.5428	1.45475	1.16497	0.540773	0.220292	0.380532	1.41034e+06	1.23642e+06	1.32338e+06	0.36295	0.26535	0.00155	2.40048	2.00761	0.0418834	1.26332	1.00548	1.1344	-4.57748
3	A5	NLRP8	Targeted gene	696290	695058	695674	0.6726	0.7111	1.33724	1.30611	0.419254	0.385279	0.402267	1.58163e+06	1.34782e+06	1.46473e+06	0.24275	0.14525	0.04225	1.45057	0.992897	1.03149	0.536618	-0.0102845	0.263167	0.0447317
3	A6	TLR8	Targeted gene	752127	650426	701276	0.4714	0.6591	0.929731	1.20093	-0.105115	0.264152	0.0795186	1.35631e+06	1.21313e+06	1.28472e+06	0.16425	0.12845	0.04085	1.119	1.00108	1.13705	0.162216	0.00155983	0.0818879	0.185292
3	A7	NLRP1	Targeted gene	759119	680177	719648	0.4616	0.4378	0.887161	0.777341	-0.172732	-0.363381	-0.268056	1.96475e+06	1.70878e+06	1.83677e+06	0.17775	0.19335	0.04495	0.847015	1.05399	0.875127	-0.23954	0.0758554	-0.0818424	-0.192435
3	A8	CD302	Targeted gene	757845	681725	719785	0.4942	0.612	0.949635	1.08644	-0.0745546	0.119604	0.0225247	1.39437e+06	1.13147e+06	1.26292e+06	0.19825	0.12835	0.04305	1.37395	1.01757	1.21897	0.458334	0.0251269	0.24173	0.28566
3	A9	TRHR	Neutral control	732369	642619	687494	0.4733	0.5384	0.952192	1.00067	-0.0706758	0.000969769	-0.034853	1.34046e+06	1.14872e+06	1.24459e+06	0.21135	0.17125	0.04555	1.48632	1.37768	1.30875	0.57174	0.46224	0.51699	0.38819
3	A10	IRAK4	Targeted gene	759739	649146	704442	0.384	0.5733	0.75395	1.0399	-0.407459	0.0564468	-0.175506	1.35985e+06	708527	1.03419e+06	0.13775	0.14785	0.03185	1.16581	1.43142	1.1013	0.221332	0.517444	0.369388	0.139206
3	A11	Non-targeting control-2	Non-targeting control	805526	681926	743726	0.2537	0.4207	0.471807	0.722795	-1.08373	-0.468341	-0.776036	820246	687811	754028	0.10365	0.09055	0.01935	1.20314	1.20239	0.917675	0.266808	0.265905	0.266356	-0.123945
3	A12	pulse/no RNP	No RNP control	884220	849108	866664	0.3713	0.9929	0.592558	1.4639	-0.754971	0.549814	-0.102579	817470	664065	740767	0.09455	0.10825	0.01405	1.11716	1.46316	0.67825	0.159836	0.549083	0.35446	-0.560111
3	B1	CLEC2D	Targeted gene	671933	599618	635775	0.32	0.3242	0.69615	0.651576	-0.522529	-0.617995	-0.570262	1.26239e+06	1.06621e+06	1.1643e+06	0.09185	0.12425	0.01615	0.690477	1.0685	0.496024	-0.534335	0.0955897	-0.219373	-1.01152
3	B2	KLRC1	Targeted gene	983902	658404	821153	0.4771	0.4963	0.803604	0.772282	-0.315443	-0.3728	-0.344122	1.59928e+06	1.29702e+06	1.44815e+06	0.17275	0.17655	0.03155	1.04409	1.22067	0.779078	0.0622514	0.287673	0.174962	-0.360161
3	B3	CLEC16A	Targeted gene	682285	624718	653501	0.3811	0.4967	0.806583	0.971188	-0.310105	-0.0421773	-0.176141	1.46326e+06	1.17487e+06	1.31907e+06	0.10375	0.13075	0.01515	0.688425	0.992475	0.410716	-0.538628	-0.0108976	-0.274763	-1.28379
3	B4	NLRP13	Targeted gene	829847	764961	797404	0.465	0.6279	0.80655	1.00616	-0.310164	0.00886246	-0.150651	1.81218e+06	1.50016e+06	1.65617e+06	0.17305	0.19785	0.07325	0.914538	1.19612	1.5816	-0.128885	0.258364	0.0647396	0.661388
3	B5	TNF	Positive control	885214	964511	924862	0.0561	0.0684	0.0838963	0.0945006	-3.57525	-3.40353	-3.48939	2.18353e+06	1.94687e+06	2.0652e+06	0.02595	0.02825	0.03285	0.109979	0.136962	0.568812	-3.1847	-2.86815	-3.02642	-0.813977
3	B6	TAS2R9	Neutral control	732607	690243	711425	0.4782	0.5355	0.929688	0.961803	-0.105181	-0.0561866	-0.0806839	2.46551e+06	2.10841e+06	2.28696e+06	0.18735	0.19155	0.03995	0.717019	0.838625	0.624674	-0.479918	-0.253902	-0.36691	-0.678825
3	B7	KLRF1	Targeted gene	789727	858689	824208	0.4316	0.5104	0.724272	0.791279	-0.465397	-0.337742	-0.401569	1.76179e+06	1.60087e+06	1.68133e+06	0.16375	0.18475	0.03945	0.852439	1.10021	0.839052	-0.230331	0.137779	-0.0462759	-0.253167
3	B8	OR51T1	Neutral control	818125	664709	741417	0.5027	0.5957	0.937785	1.02665	-0.0926712	0.0379392	-0.027366	1.88126e+06	1.61516e+06	1.74821e+06	0.18255	0.23345	0.03485	0.913952	1.33704	0.71286	-0.12981	0.419043	0.144616	-0.488309
3	B9	TNFAIP3	Targeted gene	566195	465214	515704	1.6722	1.7666	4.48481	4.37717	2.16505	2.13	2.14752	2.33801e+06	2.14658e+06	2.2423e+06	1.01065	1.20545	0.55305	3.94497	5.38271	8.81996	1.98001	2.42833	2.20417	3.14077
3	B10	IRAK1	Targeted gene	767989	605773	686881	0.1266	0.1594	0.254923	0.296526	-1.97187	-1.75377	-1.86282	2.50526e+06	2.37094e+06	2.4381e+06	0.08545	0.11535	0.01495	0.306758	0.473708	0.219273	-1.70483	-1.07793	-1.39138	-2.1892
3	B11	SFTPA1	Targeted gene	595798	510147	552972	0.353	0.3258	0.882934	0.752841	-0.179623	-0.409583	-0.294603	1.8868e+06	1.81802e+06	1.85241e+06	0.17725	0.24135	0.03035	0.837499	1.30453	0.585891	-0.255841	0.383531	0.0638451	-0.771296
3	B12	pulse/no RNP	No RNP control	689950	645291	667620	0.2025	0.6998	0.41952	1.33937	-1.25319	0.421553	-0.415819	2.01009e+06	1.83302e+06	1.92156e+06	0.17505	0.23695	0.03125	0.797342	1.23466	0.581557	-0.32673	0.304116	-0.0113068	-0.782007
3	C1	KLRB1	Targeted gene	522664	613578	568121	0.3317	0.3402	0.807535	0.765155	-0.308403	-0.386177	-0.34729	1.29162e+06	1.11347e+06	1.20255e+06	0.10545	0.16715	0.02085	0.767503	1.39171	0.620011	-0.381755	0.476859	0.047552	-0.689634
3	C2	KLRG2	Targeted gene	755009	679905	717457	0.4921	0.5478	0.948668	0.975623	-0.0760244	-0.0356046	-0.0558145	2.17093e+06	1.77326e+06	1.9721e+06	0.20615	0.17805	0.06295	0.914936	0.903979	1.14147	-0.128257	-0.145639	-0.136948	0.190888
3	C3	KLRD1	Targeted gene	656022	543170	599596	0.4653	0.541	1.07332	1.15291	0.102087	0.205276	0.153681	2.42322e+06	2.24772e+06	2.33547e+06	0.20445	0.22965	0.05565	0.766211	0.984547	0.852091	-0.384187	-0.0224681	-0.203328	-0.23092
3	C4	FADD	Targeted gene	854775	720357	787566	0.5347	0.6147	0.939031	0.997314	-0.0907548	-0.00387995	-0.0473174	2.45919e+06	2.20446e+06	2.33183e+06	0.45595	0.49715	0.12125	1.71142	2.13469	1.85943	0.775194	1.09403	0.934612	0.894864
3	C5	TLR4	Targeted gene	833206	773164	803185	0.1449	0.2296	0.249522	0.365268	-2.00276	-1.45297	-1.72786	2.35441e+06	2.00821e+06	2.18131e+06	0.01615	0.01575	0.00155	0.0648023	0.0722948	0.0254103	-3.94781	-3.78996	-3.86889	-5.29844
3	C6	ACAN	Targeted gene	604399	555049	579724	0.3868	0.376	0.922831	0.828748	-0.115862	-0.270995	-0.193429	2.21797e+06	1.99884e+06	2.10841e+06	0.18815	0.23745	0.04985	0.781062	1.12762	0.845486	-0.356491	0.17328	-0.0916058	-0.242148
3	C7	PILRA	Targeted gene	709767	655381	682574	0.4679	0.5816	0.948113	1.08876	-0.0768689	0.12268	0.0229057	2.54736e+06	2.39202e+06	2.46969e+06	0.17065	0.19895	0.04975	0.604782	0.806577	0.720354	-0.725512	-0.310116	-0.517814	-0.473222
3	C8	TAB1	Targeted gene	678267	681707	679987	0.3524	0.435	0.71679	0.817418	-0.480377	-0.290853	-0.385615	2.89743e+06	2.58908e+06	2.74326e+06	0.21535	0.23905	0.07815	0.687091	0.872503	1.01873	-0.541428	-0.196768	-0.369098	0.0267682
3	C9	IRF3	Targeted gene	562361	536530	549445	0.3323	0.4229	0.836494	0.983487	-0.257574	-0.0240214	-0.140798	2.13172e+06	1.98309e+06	2.05741e+06	0.24415	0.19515	0.05875	1.03866	0.949714	1.02114	0.0547194	-0.0744345	-0.00985754	0.0301737
3	C10	PRG2	Targeted gene	535984	550401	543192	0.3115	0.3894	0.793161	0.916005	-0.334315	-0.126572	-0.230444	2.11114e+06	1.98195e+06	2.04655e+06	0.21095	0.19435	0.05875	0.902181	0.95084	1.02655	-0.148512	-0.0727255	-0.110619	0.0378091
3	C11	NLRC3	Targeted gene	512626	481815	497220	0.2812	0.3156	0.78221	0.811043	-0.354373	-0.30215	-0.328262	1.88473e+06	1.79248e+06	1.83861e+06	0.24365	0.15925	0.07025	1.15988	0.867232	1.36632	0.213976	-0.20551	0.00423276	0.450297
3	C12	no pulse/no RNP	No pulse control	484057	437749	460903	0.3413	0.3951	1.0242	1.09535	0.0344936	0.131393	0.0829434	1.15867e+06	1.02391e+06	1.09129e+06	0.16635	0.15285	0.02485	1.33419	1.40239	0.814294	0.415964	0.487888	0.451926	-0.296379
3	D1	IRF1	Targeted gene	852290	716927	784608	0.297	0.2391	0.523553	0.389388	-0.933594	-1.36072	-1.14716	1.46423e+06	1.21295e+06	1.33859e+06	0.05415	0.04845	0.01635	0.354067	0.362402	0.436783	-1.4979	-1.46434	-1.48112	-1.19501
3	D2	CLEC3B	Targeted gene	788515	674098	731306	0.4148	0.3521	0.784506	0.615209	-0.350144	-0.700852	-0.525498	2.25738e+06	2.01002e+06	2.1337e+06	0.19815	0.16285	0.05025	0.812823	0.764185	0.842166	-0.298987	-0.388006	-0.343496	-0.247823
3	D3	PLA2R1	Targeted gene	733954	677149	705551	0.2837	0.3057	0.556144	0.553634	-0.846469	-0.852996	-0.849733	1.92987e+06	1.71396e+06	1.82192e+06	0.17265	0.17105	0.04625	0.829418	0.940024	0.907776	-0.269828	-0.0892299	-0.179529	-0.139591
3	D4	SIRPA	Targeted gene	699668	513446	606557	0.3029	0.2813	0.690692	0.592589	-0.533885	-0.754895	-0.64439	1.79413e+06	1.58769e+06	1.69091e+06	0.18665	0.16175	0.04795	0.966146	0.957785	1.01406	-0.0496872	-0.0622266	-0.0559569	0.0201416
3	D5	PLCG1	Targeted gene	589351	534190	561770	0.3337	0.2365	0.821588	0.537933	-0.283513	-0.894502	-0.589008	1.88492e+06	1.75406e+06	1.81949e+06	0.19605	0.19965	0.05565	0.943088	1.09866	1.09373	-0.0845352	0.135747	0.0256057	0.129258
3	D6	MAPK14	Targeted gene	712469	578963	645716	0.3725	0.2869	0.797887	0.567734	-0.325743	-0.816713	-0.571228	1.86605e+06	1.66705e+06	1.76655e+06	0.22265	0.21155	0.05035	1.10314	1.19903	1.01922	0.14162	0.261872	0.201746	0.0274678
3	D7	PVR	Targeted gene	619402	488653	554027	0.4958	0.2992	1.23775	0.690059	0.307717	-0.535209	-0.113746	2.15818e+06	1.97899e+06	2.06859e+06	0.25505	0.22445	0.07465	1.07916	1.0864	1.29048	0.109913	0.119558	0.114736	0.367909
3	D8	RPE65	Neutral control	817216	750066	783641	0.44	0.4532	0.776591	0.738973	-0.364773	-0.436407	-0.40059	2.27924e+06	2.02815e+06	2.1537e+06	0.20935	0.15055	0.05555	0.850793	0.699908	0.922348	-0.233119	-0.514763	-0.373941	-0.116616
3	D9	CLEC9A	Targeted gene	755820	698668	727244	0.437	0.3849	0.831109	0.676275	-0.26689	-0.564317	-0.415604	2.4604e+06	2.23127e+06	2.34584e+06	0.24855	0.17595	0.07455	0.927367	0.750993	1.13644	-0.108788	-0.413128	-0.260958	0.184518
3	D10	PKD1	Targeted gene	961293	655662	808477	0.3498	0.4491	0.598424	0.709792	-0.740761	-0.494533	-0.617647	1.98171e+06	1.77741e+06	1.87956e+06	0.24825	0.13535	0.08165	1.15603	0.721018	1.55344	0.209176	-0.471892	-0.131358	0.635468
3	D11	VSIR	Targeted gene	684764	698427	691595	0.3685	0.3754	0.736957	0.693582	-0.440348	-0.527861	-0.484104	1.88727e+06	1.78364e+06	1.83546e+06	0.26745	0.16515	0.06065	1.27536	0.900905	1.18163	0.350909	-0.150553	0.100178	0.24078
3	D12	no pulse/no RNP	No pulse control	705882	840012	772947	0.508	0.3599	0.909015	0.59496	-0.137625	-0.749135	-0.44338	489621	365053	427337	0.06575	0.06175	0.00365	1.34667	1.44681	0.305434	0.429395	0.532874	0.481135	-1.71107
3	E1	CLEC4A	Targeted gene	822899	731186	777042	0.43	0.455	0.765386	0.748208	-0.385741	-0.418489	-0.402115	1.31562e+06	1.15582e+06	1.23572e+06	0.15855	0.14705	0.02345	1.123	1.19149	0.678606	0.167363	0.252762	0.210062	-0.559355
3	E2	LMAN1L	Targeted gene	919848	743404	831626	0.6242	0.903	1.03813	1.38744	0.0539899	0.472429	0.26321	1.73025e+06	1.32235e+06	1.5263e+06	0.20135	0.15585	0.04615	1.15464	1.02238	1.08125	0.207444	0.031927	0.119685	0.112703
3	E3	REG3A	Targeted gene	805096	718554	761825	0.5482	0.6088	0.995269	1.02112	-0.00684102	0.0301472	0.0116531	1.49061e+06	1.3238e+06	1.40721e+06	0.16035	0.18115	0.03535	0.997348	1.28892	0.898312	-0.0038315	0.36616	0.181164	-0.154712
3	E4	SIGLEC15	Targeted gene	1.21898e+06	1.10967e+06	1.16433e+06	0.7489	0.7989	0.889621	0.876743	-0.168738	-0.189774	-0.179256	2.00114e+06	1.91993e+06	1.96054e+06	0.23565	0.22285	0.05125	1.05203	1.1381	0.934791	0.0731756	0.186633	0.129904	-0.0972846
3	E5	LALBA	Neutral control	872947	853255	863101	0.5863	0.6101	0.93954	0.903223	-0.089974	-0.146845	-0.11841	1.81172e+06	1.57528e+06	1.6935e+06	0.23625	0.16855	0.05045	1.22102	0.996524	1.0653	0.288084	-0.00502383	0.14153	0.0912568
3	E6	AIM2	Targeted gene	709386	681391	695388	0.4159	0.5083	0.827215	0.934003	-0.273666	-0.0985006	-0.186083	1.34289e+06	1.26334e+06	1.30312e+06	0.14665	0.12475	0.02845	0.984996	0.958521	0.780718	-0.0218106	-0.0611177	-0.0414642	-0.357126
3	E7	CRX	Neutral control	924007	798820	861413	0.6254	0.7597	1.00416	1.1269	0.00598957	0.172362	0.089176	2.48228e+06	2.43034e+06	2.45631e+06	0.24835	0.22975	0.05825	0.884945	0.936519	0.848024	-0.17634	-0.0946198	-0.13548	-0.237824
3	E8	CD300A	Targeted gene	671318	665727	668522	0.4537	0.5595	0.938663	1.0694	-0.0913212	0.0968005	0.00273963	2.28376e+06	2.06326e+06	2.17351e+06	0.22375	0.21995	0.05815	0.901025	1.01323	0.956716	-0.150362	0.0189568	-0.0657024	-0.0638367
3	E9	OR2D2	Neutral control	916315	876146	896230	0.6899	0.6827	1.06469	0.973343	0.0904338	-0.0389796	0.0257271	2.28806e+06	2.19226e+06	2.24016e+06	0.25115	0.21505	0.07095	0.981272	0.96118	1.13258	-0.0272749	-0.0571217	-0.0421983	0.179612
3	E10	Non-targeting control-1	Non-targeting control	922650	814714	868682	0.799	0.8002	1.27216	1.17705	0.347284	0.235171	0.291227	1.77117e+06	1.6712e+06	1.72119e+06	0.17755	0.26075	0.04055	0.902876	1.51684	0.842478	-0.1474	0.601073	0.226836	-0.24729
3	E11	CD72	Targeted gene	584660	568770	576715	0.3768	0.4067	0.903663	0.901091	-0.146143	-0.150255	-0.148199	2.73449e+06	2.29421e+06	2.51435e+06	0.33725	0.23035	0.09375	1.17398	0.91729	1.33334	0.231411	-0.12455	0.0534305	0.415044
3	F1	BIRC3	Targeted gene	772028	722632	747330	0.4822	0.3103	0.892425	0.530549	-0.164197	-0.914443	-0.53932	1.65832e+06	1.38766e+06	1.52299e+06	0.14225	0.11265	0.03955	0.817505	0.740591	0.928634	-0.290701	-0.433252	-0.361976	-0.106819
3	F2	LBP	Targeted gene	886989	755139	821064	0.5724	0.6235	0.964227	0.970321	-0.0525547	-0.0434667	-0.0480107	3.20647e+06	2.87164e+06	3.03906e+06	0.29895	0.23845	0.08865	0.860985	0.785603	1.04312	-0.215941	-0.348128	-0.282034	0.060909
3	F3	KCNV1	Neutral control	742224	685163	713693	0.6235	0.6342	1.20832	1.13546	0.273001	0.183272	0.228136	3.80619e+06	3.35409e+06	3.58014e+06	0.44885	0.31665	0.12845	1.09733	0.885572	1.28301	0.133996	-0.175319	-0.0206615	0.35953
3	F4	F13B	Neutral control	696714	604094	650404	0.5582	0.5767	1.18703	1.13298	0.247362	0.180123	0.213743	2.94817e+06	2.92607e+06	2.93712e+06	0.28435	0.28365	0.09055	0.847358	0.966953	1.10246	-0.238957	-0.0484821	-0.143719	0.140724
3	F5	CLEC5A	Targeted gene	513955	473065	493510	0.3896	0.4537	1.09189	1.1747	0.126831	0.232298	0.179564	2.53165e+06	2.26963e+06	2.40064e+06	0.22515	0.20245	0.06425	0.820881	0.844374	0.957065	-0.284755	-0.244045	-0.2644	-0.0633117
3	F6	TREM1	Targeted gene	612452	545135	578793	0.532	0.412	1.27129	0.909556	0.346294	-0.136766	0.104764	2.78843e+06	2.47743e+06	2.63293e+06	0.27935	0.26925	0.08265	0.928634	1.02391	1.12253	-0.106818	0.0340853	-0.0363662	0.166757
3	F7	CD248	Targeted gene	610636	491332	550984	0.3587	0.4694	0.900429	1.08858	-0.151316	0.122446	-0.0144352	2.77607e+06	2.45124e+06	2.61366e+06	0.28595	0.24605	0.08035	0.957585	0.942583	1.09934	-0.0625281	-0.0853092	-0.0739186	0.13664
3	F8	VCAN	Targeted gene	623420	556588	590004	0.3853	0.3928	0.903235	0.850692	-0.146826	-0.233291	-0.190059	1.56261e+06	1.5364e+06	1.54951e+06	0.21885	0.23575	0.04625	1.2362	1.52336	1.06737	0.305912	0.607258	0.456585	0.0940565
3	F9	SDC1	Targeted gene	542994	535691	539342	0.4039	0.3559	1.03578	0.843178	0.0507128	-0.246091	-0.0976893	1.72181e+06	1.59924e+06	1.66053e+06	0.26535	0.20725	0.06025	1.39865	1.24966	1.2975	0.484034	0.32154	0.402787	0.375732
3	F10	KLRF2	Targeted gene	580724	525595	553159	0.458	0.4773	1.14518	1.10255	0.195569	0.140839	0.168204	1.37855e+06	1.15484e+06	1.2667e+06	0.16955	0.11055	0.03715	1.17155	0.873837	1.04877	0.228418	-0.194563	0.0169275	0.068703
3	F11	COLEC11	Targeted gene	663624	535188	599406	0.508	0.5226	1.17219	1.11405	0.229211	0.155812	0.192512	1.02578e+06	996536	1.01116e+06	0.16675	0.09025	0.03245	1.44339	0.893661	1.1476	0.529457	-0.1622	0.183628	0.198622
3	G1	CD300LB	Targeted gene	860683	737923	799303	0.3663	0.4433	0.633844	0.708667	-0.6578	-0.496821	-0.577311	1.02669e+06	938913	982801	0.13375	0.07315	0.01365	1.19114	0.745235	0.496664	0.252346	-0.424233	-0.0859436	-1.00966
3	G2	CLC	Targeted gene	779293	748979	764136	0.4369	0.525	0.790803	0.877899	-0.33861	-0.187874	-0.263242	1.33475e+06	1.23849e+06	1.28662e+06	0.13375	0.12865	0.02405	0.909868	1.00116	0.668436	-0.136271	0.00167239	-0.0672991	-0.581139
3	G3	SDC4	Targeted gene	784485	627515	706000	0.4379	0.4123	0.857881	0.746216	-0.22115	-0.422335	-0.321743	1.22192e+06	1.03804e+06	1.12998e+06	0.10565	0.11435	0.02045	0.81834	1.01323	0.647168	-0.289228	0.0189657	-0.135131	-0.627787
3	G4	CD1C	Targeted gene	724818	720340	722579	0.4521	0.4912	0.865378	0.868618	-0.208597	-0.203206	-0.205902	1.33142e+06	1.14117e+06	1.2363e+06	0.18975	0.11985	0.02735	1.34337	0.970644	0.791098	0.425853	-0.0429863	0.191434	-0.338072
3	G5	CLEC4F	Targeted gene	870580	691377	780978	0.4779	0.4759	0.846359	0.778632	-0.240658	-0.360986	-0.300822	1.18769e+06	1.13528e+06	1.16149e+06	0.07875	0.09395	0.01455	0.593433	0.809892	0.447965	-0.752842	-0.304199	-0.528521	-1.15854
3	G6	TLR6	Targeted gene	648943	524416	586679	0.5082	0.4347	1.19809	0.94677	0.26074	-0.0789141	0.090913	1.50557e+06	1.62049e+06	1.56303e+06	0.20125	0.23505	0.02615	1.12695	1.5057	0.598273	0.17242	0.59043	0.381425	-0.741125
3	G7	LGALS14	Targeted gene	726364	633723	680043	0.3869	0.4007	0.786899	0.752902	-0.34575	-0.409466	-0.377608	2.07197e+06	2.11447e+06	2.09322e+06	0.18785	0.20645	0.05345	0.785474	0.987516	0.91312	-0.348365	-0.0181237	-0.183245	-0.131123
3	G8	CASP1	Targeted gene	663145	601153	632149	0.4122	0.4424	0.901873	0.894235	-0.149004	-0.161275	-0.155139	2.19094e+06	1.77929e+06	1.98512e+06	0.16725	0.20575	0.04895	0.737421	1.03776	0.881784	-0.439439	0.0534776	-0.192981	-0.181503
3	G9	BLNK	Targeted gene	817544	718712	768128	0.3634	0.3458	0.654347	0.575237	-0.611872	-0.79777	-0.704821	2.25444e+06	1.94519e+06	2.09982e+06	0.16965	0.21875	0.05335	0.707144	1.04306	0.90855	-0.499923	0.0608285	-0.219547	-0.138363
3	G10	CLEC4G	Targeted gene	674023	627920	650971	0.5919	0.46	1.2576	0.902925	0.330675	-0.147322	0.0916767	1.42765e+06	1.37007e+06	1.39886e+06	0.11305	0.38715	0.02535	0.707345	2.77108	0.648035	-0.499514	1.47045	0.485467	-0.625856
3	G11	REG3G	Targeted gene	701804	652908	677356	0.4517	0.5499	0.922338	1.03734	-0.116633	0.0528935	-0.0318698	1.85958e+06	1.63342e+06	1.7465e+06	0.16255	0.16545	0.04735	0.814617	0.948511	0.969497	-0.295806	-0.0762638	-0.186035	-0.0446918
3	H1	CD48	Targeted gene	511334	505991	508662	0.09	0.1058	0.24472	0.265774	-2.0308	-1.91173	-1.97126	808628	637860	723244	0.06595	0.06535	0.01095	0.798115	0.904702	0.541408	-0.325331	-0.144486	-0.234909	-0.885212
3	H2	ALCAM	Targeted gene	620141	545271	582706	0.231	0.2351	0.548301	0.515536	-0.866959	-0.955855	-0.911407	668483	586379	627431	0.12525	0.07815	0.01445	1.74722	1.24712	0.823564	0.805061	0.318598	0.561829	-0.280047
3	H3	ALPK1	Targeted gene	566133	495535	530834	0.186	0.2431	0.484631	0.58517	-1.04504	-0.773072	-0.909057	676415	594424	635419	0.07695	0.09135	0.00965	1.05995	1.43944	0.543078	0.0839909	0.525504	0.304748	-0.880769
3	H4	CLEC4C	Targeted gene	459414	405651	432532	0.196	0.2604	0.62675	0.769269	-0.674038	-0.378441	-0.52624	752433	694063	723248	0.08185	0.07425	0.02015	0.990529	1.02791	0.996284	-0.0137292	0.0397098	0.0129903	-0.00537063
3	H5	POLR2A	Essential control	658964	584324	621644	0.2334	0.3174	0.519297	0.652411	-0.945368	-0.616148	-0.780758	1.91243e+06	1.57634e+06	1.74439e+06	0.28255	0.21945	0.05855	1.41771	1.25961	1.20027	0.503565	0.332981	0.418273	0.263361
3	H6	LGALS2	Targeted gene	509076	481225	495150	0.3812	0.4002	1.06481	1.03275	0.0905974	0.0464924	0.0685449	844796	756987	800891	0.08225	0.09515	0.01285	0.898872	1.18954	0.573753	-0.153812	0.250406	0.0482969	-0.801498
3	H7	U2AF2	Essential control	363318	259651	311484	0.1933	0.2334	0.858326	0.957459	-0.220402	-0.0627173	-0.14156	1.27043e+06	1.1681e+06	1.21927e+06	0.14495	0.12105	0.04505	1.04053	0.994055	1.32127	0.05732	-0.00860175	0.0243591	0.401925
3	H8	CLEC3A	Targeted gene	489784	238817	364300	0.3114	0.2557	1.18227	0.896864	0.241556	-0.157038	0.0422589	1.46654e+06	1.37881e+06	1.42268e+06	0.21995	0.16555	0.06065	1.35317	1.16511	1.52447	0.436346	0.220468	0.328407	0.608312
3	H9	CLEC4E	Targeted gene	457667	427300	442483	0.2405	0.2671	0.751752	0.771316	-0.41167	-0.374605	-0.393138	1.10485e+06	995462	1.05016e+06	0.14155	0.12795	0.03475	1.17975	1.21992	1.1833	0.238487	0.286786	0.262636	0.242822
3	H10	CLEC2L	Targeted gene	453697	500489	477093	0.2505	0.2441	0.726209	0.653763	-0.461544	-0.61316	-0.537352	1.58152e+06	1.29525e+06	1.43839e+06	0.16735	0.13345	0.04665	1.01832	0.92894	1.15977	0.0261956	-0.106343	-0.0400738	0.213837
3	H11	MYD88	Targeted gene	599057	612988	606022	0.1713	0.233	0.390954	0.491273	-1.35493	-1.0254	-1.19017	895845	814837	855341	0.08395	0.07965	0.00824999	0.859047	0.932376	0.344913	-0.21919	-0.101016	-0.160103	-1.53569
4	A1	LAYN	Targeted gene	1.68514e+06	2.10769e+06	1.89642e+06	0.6454	0.7436	0.576284	0.616033	-0.795149	-0.69892	-0.747035	1.83073e+06	1.5176e+06	1.67416e+06	0.17545	0.12755	0.02945	0.975952	0.643648	0.740668	-0.0351173	-0.635657	-0.335387	-0.433101
4	A2	NLRP12	Targeted gene	1.27986e+06	1.19049e+06	1.23518e+06	0.6507	0.7694	0.892058	0.978637	-0.164791	-0.0311541	-0.0979727	1.90977e+06	1.72612e+06	1.81794e+06	0.14415	0.10645	0.02705	0.738427	0.494687	0.626502	-0.437473	-1.01541	-0.726442	-0.674608
4	A3	LGALS13	Targeted gene	1.75363e+06	1.65282e+06	1.70323e+06	1.1532	1.0049	1.1465	0.926934	0.197234	-0.109461	0.0438862	1.70573e+06	1.34992e+06	1.52782e+06	0.16815	0.21565	0.03125	1.02494	1.19245	0.861218	0.0355341	0.253934	0.144734	-0.21555
4	A4	LY86	Targeted gene	1.48115e+06	1.39885e+06	1.44e+06	1.0213	0.7122	1.20097	0.777029	0.264198	-0.363959	-0.0498805	2.02414e+06	1.81581e+06	1.91997e+06	0.20785	0.13865	0.03135	1.00816	0.610085	0.687509	0.0117197	-0.712918	-0.350599	-0.540549
4	A5	SELP	Targeted gene	1.25817e+06	1.24839e+06	1.25328e+06	0.5807	0.5519	0.784593	0.691847	-0.349984	-0.531474	-0.440729	1.87061e+06	1.67462e+06	1.77261e+06	0.15995	0.16165	0.02235	0.840317	0.770419	0.530884	-0.250994	-0.376284	-0.313639	-0.913532
4	A6	FCN1	Targeted gene	1.00439e+06	929118	966752	0.4779	0.5861	0.837072	0.952478	-0.256577	-0.070243	-0.16341	2.16019e+06	2.04603e+06	2.10311e+06	0.18175	0.17155	0.03835	0.804796	0.68912	0.767785	-0.313305	-0.537174	-0.425239	-0.381225
4	A7	POLR2A	Essential control	1.20833e+06	1.08541e+06	1.14687e+06	0.3903	0.4527	0.576269	0.620146	-0.795187	-0.689319	-0.742253	2.32709e+06	2.08074e+06	2.20391e+06	0.32255	0.25195	0.05455	1.36294	0.965796	1.04216	0.446719	-0.0502097	0.198254	0.0595828
4	A8	VAV1	Targeted gene	881120	807299	844209	0.3563	0.4057	0.714672	0.755011	-0.484648	-0.405431	-0.445039	1.86445e+06	1.75996e+06	1.8122e+06	0.16975	0.17245	0.03375	0.87232	0.803937	0.784157	-0.19707	-0.314846	-0.255958	-0.350786
4	A9	SELE	Targeted gene	854228	853909	854068	0.4816	0.4465	0.954849	0.821348	-0.0666555	-0.283935	-0.175295	1.35248e+06	1.33075e+06	1.34161e+06	0.11865	0.10965	0.02505	0.823594	0.690473	0.78617	-0.279994	-0.534343	-0.407168	-0.347087
4	A10	TNF	Positive control	741697	688109	714903	0.0689	0.0435	0.163197	0.0955962	-2.61531	-3.3869	-3.00111	1.61446e+06	1.56009e+06	1.58727e+06	0.01815	0.01385	0.01895	0.106487	0.0737163	0.502682	-3.23125	-3.76187	-3.49656	-0.992281
4	A11	NLRP14	Targeted gene	758686	631319	695002	0.3268	0.4878	0.796226	1.10269	-0.328749	0.141028	-0.0938604	1.8069e+06	1.64858e+06	1.72774e+06	0.12285	0.10585	0.02255	0.662171	0.517581	0.549547	-0.594724	-0.950143	-0.772433	-0.863686
4	A12	pulse/no RNP	No RNP control	723079	750200	736639	0.5419	0.5513	1.24568	1.17579	0.316929	0.233636	0.275282	1.13944e+06	1.27509e+06	1.20726e+06	0.18995	0.17475	0.00865	1.46525	1.22287	0.301682	0.551142	0.290272	0.420707	-1.7289
4	B1	CDC42	Targeted gene	1.19788e+06	1.17059e+06	1.18424e+06	0.4375	0.5082	0.625577	0.674209	-0.676741	-0.568732	-0.622736	1.14968e+06	1.0745e+06	1.11209e+06	0.10535	0.07815	0.01065	0.882202	0.593684	0.403224	-0.180818	-0.752234	-0.466526	-1.31035
4	B2	REG1B	Targeted gene	1.17511e+06	1.17548e+06	1.1753e+06	0.7246	0.7741	1.04398	1.03478	0.0620934	0.0493245	0.0557089	1.61376e+06	1.47949e+06	1.54662e+06	0.14405	0.15295	0.02365	0.867365	0.835469	0.643847	-0.205289	-0.259342	-0.232315	-0.635211
4	B3	CLEC14A	Targeted gene	1.13333e+06	1.02836e+06	1.08085e+06	0.7475	0.5954	1.17108	0.865453	0.227845	-0.208473	0.00968613	1.34713e+06	1.14417e+06	1.24565e+06	0.10385	0.11335	0.01155	0.776397	0.768761	0.390411	-0.365133	-0.379392	-0.372263	-1.35693
4	B4	SIGLEC14	Targeted gene	784778	702535	743656	0.4916	0.2939	1.11939	0.620906	0.162709	-0.687554	-0.262422	1.55092e+06	1.47897e+06	1.51494e+06	0.19095	0.19755	0.02675	1.17381	1.10166	0.74347	0.231194	0.139674	0.185434	-0.427654
4	B5	OR51T1	Neutral control	947813	840647	894230	0.441	0.3869	0.835084	0.679748	-0.260006	-0.556928	-0.408467	1.86034e+06	1.71407e+06	1.7872e+06	0.20065	0.24605	0.02675	1.04553	1.16309	0.630211	0.0642405	0.217968	0.141104	-0.666094
4	B6	SFTPA2	Targeted gene	803804	758997	781400	0.3777	0.3521	0.818492	0.707931	-0.288961	-0.49832	-0.39364	2.08563e+06	1.92299e+06	2.00431e+06	0.21325	0.21385	0.03865	0.990827	0.901385	0.811934	-0.0132955	-0.149785	-0.0815402	-0.300565
4	B7	TRAF3	Targeted gene	949932	831463	890697	0.5116	0.5044	0.972616	0.889699	-0.0400585	-0.168611	-0.104335	3.02884e+06	2.71216e+06	2.8705e+06	0.23985	0.25025	0.05115	0.778136	0.736516	0.750282	-0.361905	-0.441211	-0.401558	-0.414496
4	B8	F13B	Neutral control	788172	792550	790361	0.4193	0.4317	0.898339	0.858134	-0.154668	-0.220726	-0.187697	1.9137e+06	2.02254e+06	1.96812e+06	0.18405	0.19415	0.03335	0.870879	0.833397	0.713478	-0.199456	-0.262925	-0.23119	-0.487059
4	B9	CLEC12B	Targeted gene	763803	695688	729745	0.4735	0.332	1.09873	0.714768	0.135832	-0.484453	-0.174311	2.05002e+06	1.98326e+06	2.01664e+06	0.22275	0.19115	0.04355	1.02864	0.800777	0.909277	0.0407363	-0.320527	-0.139895	-0.137208
4	B10	JUN	Targeted gene	620879	620289	620584	0.3511	0.3549	0.958012	0.89847	-0.0618837	-0.154457	-0.10817	2.28781e+06	2.19241e+06	2.24011e+06	0.21045	0.20355	0.05685	0.874889	0.767658	1.06856	-0.192828	-0.381465	-0.287146	0.0956632
4	B11	TLR10	Targeted gene	957031	964897	960964	0.4212	0.6073	0.742202	0.992875	-0.430116	-0.0103163	-0.220216	1.76822e+06	1.65671e+06	1.71246e+06	0.19215	0.18265	0.04535	1.04494	0.901081	1.11504	0.0634229	-0.150271	-0.0434241	0.157101
4	B12	pulse/no RNP	No RNP control	771546	708366	739956	0.4122	0.6909	0.943285	1.46692	-0.0842341	0.552794	0.23428	931973	842175	887074	0.09615	0.05475	0.01085	1.0094	0.521423	0.514999	0.0134961	-0.939475	-0.462989	-0.95736
4	C1	CASP2	Targeted gene	1.00696e+06	801742	904349	0.4375	0.3207	0.819186	0.557136	-0.287737	-0.843899	-0.565818	1.54109e+06	1.24156e+06	1.39132e+06	0.14035	0.15815	0.03325	0.939415	0.960299	1.00623	-0.0901656	-0.058444	-0.0743048	0.00896723
4	C2	MAVS	Targeted gene	840230	697532	768881	0.5848	0.4715	1.28792	0.963432	0.365044	-0.0537458	0.155649	2.49677e+06	2.1094e+06	2.30308e+06	0.24905	0.23645	0.07645	1.00705	0.867352	1.39767	0.0101321	-0.205311	-0.0975895	0.483021
4	C3	CRX	Neutral control	742633	622198	682415	0.4234	0.5609	1.05061	1.29132	0.0712317	0.36885	0.220041	3.01532e+06	2.6331e+06	2.82421e+06	0.25125	0.26485	0.08065	0.828481	0.792262	1.20239	-0.27146	-0.33595	-0.303705	0.265899
4	C4	OLR1	Targeted gene	885371	718486	801928	0.4863	0.5362	1.02686	1.05048	0.0382339	0.0710544	0.0546441	2.80422e+06	2.75636e+06	2.78029e+06	0.23925	0.25145	0.06195	0.801374	0.76406	0.938183	-0.319452	-0.388243	-0.353847	-0.0920589
4	C5	OR2D2	Neutral control	716423	699138	707780	0.4174	0.4355	0.998607	0.966691	-0.00201048	-0.0488726	-0.0254415	2.9076e+06	2.73318e+06	2.82039e+06	0.31545	0.28115	0.07365	1.04159	0.84216	1.09951	0.0587809	-0.247833	-0.0945262	0.136863
4	C6	DDX3X	Targeted gene	707256	575486	641371	0.4982	0.586	1.31533	1.43545	0.395427	0.521498	0.458463	2.79164e+06	2.56948e+06	2.68056e+06	0.31395	0.36435	0.05775	1.09071	1.14831	0.907116	0.125265	0.199512	0.162388	-0.140641
4	C7	HMGB1	Targeted gene	737363	771362	754362	0.2538	0.3504	0.569708	0.729764	-0.811705	-0.454498	-0.633102	4.3908e+06	4.38112e+06	4.38596e+06	0.40655	0.41755	0.09045	0.863222	0.804284	0.868321	-0.212196	-0.314222	-0.263209	-0.2037
4	C8	PKD1L3	Targeted gene	794192	759809	777000	0.4727	0.5482	1.03016	1.10845	0.0428702	0.148543	0.0957069	4.26312e+06	3.99317e+06	4.12814e+06	0.38215	0.46315	0.12225	0.862089	0.947834	1.2469	-0.214091	-0.0772929	-0.145692	0.318341
4	C9	TRAF6	Targeted gene	903498	808729	856113	0.1573	0.1922	0.311127	0.352712	-1.68442	-1.50344	-1.59393	4.33751e+06	4.56729e+06	4.4524e+06	0.49045	0.17265	0.06045	1.02583	0.327596	0.571661	0.0367869	-1.61001	-0.786612	-0.806769
4	C10	CD274	Targeted gene	616887	563774	590330	0.278	0.3189	0.797426	0.848707	-0.326577	-0.236662	-0.28162	4.25837e+06	4.06001e+06	4.15919e+06	0.53215	0.33995	0.13115	1.19151	0.690513	1.32769	0.252794	-0.534259	-0.140732	0.408915
4	C11	TYROBP	Targeted gene	554902	434635	494768	0.2255	0.2108	0.771766	0.669371	-0.373765	-0.579122	-0.476444	3.46919e+06	3.40699e+06	3.43809e+06	0.38245	0.26765	0.11665	1.03593	0.657682	1.42858	0.050928	-0.604538	-0.276805	0.514579
4	C12	no pulse/no RNP	No pulse control	640919	621604	631261	0.7415	0.6275	1.98904	1.56172	0.99207	0.643134	0.817602	3.19281e+06	2.77262e+06	2.98271e+06	0.75645	0.77075	0.12055	2.36179	2.18307	1.70173	1.23988	1.12636	1.18312	0.767006
4	D1	PLCG2	Targeted gene	1.13876e+06	1.06501e+06	1.10189e+06	0.4517	0.5112	0.694152	0.728874	-0.526677	-0.456259	-0.491468	1.19899e+06	1.05785e+06	1.12842e+06	0.09105	0.08615	0.01355	0.75142	0.644986	0.505598	-0.412308	-0.632659	-0.522484	-0.983938
4	D2	PYCARD	Targeted gene	943475	999211	971343	0.6173	0.5931	1.07613	0.959298	0.105852	-0.0599488	0.0229515	1.56351e+06	1.41155e+06	1.48753e+06	0.14765	0.15315	0.02905	0.92436	0.869796	0.822274	-0.113473	-0.201252	-0.157362	-0.282308
4	D3	ECSIT	Targeted gene	1.08027e+06	1.04026e+06	1.06027e+06	0.7274	0.8685	1.16171	1.28693	0.216255	0.363928	0.290092	1.44553e+06	1.4606e+06	1.45306e+06	0.13515	0.16675	0.03465	0.866173	0.969498	1.00405	-0.207273	-0.0446906	-0.125982	0.0058288
4	D4	FCER2	Targeted gene	956815	885902	921358	0.631	0.6094	1.15969	1.03914	0.213738	0.0553836	0.134561	1.9259e+06	1.707e+06	1.81645e+06	0.13565	0.15985	0.03355	0.695456	0.743456	0.777688	-0.523968	-0.427681	-0.475825	-0.362737
4	D5	HAVCR2	Targeted gene	698942	675559	687250	0.5493	0.4699	1.35343	1.07421	0.436619	0.103274	0.269947	1.95132e+06	1.94315e+06	1.94723e+06	0.21135	0.20235	0.05465	1.01078	0.877912	1.1817	0.0154716	-0.187853	-0.0861905	0.240867
4	D6	CD83	Targeted gene	1.05862e+06	1.02023e+06	1.03943e+06	0.5705	0.6618	0.929401	1.0003	-0.105627	0.000436859	-0.0525953	2.13383e+06	1.81902e+06	1.97642e+06	0.17585	0.18865	0.03455	0.828582	0.806385	0.736044	-0.271284	-0.31046	-0.290872	-0.442135
4	D7	NLRC4	Targeted gene	932282	940884	936583	0.5578	0.6631	1.00849	1.11232	0.012202	0.153576	0.0828892	2.14349e+06	2.01291e+06	2.0782e+06	0.19725	0.27655	0.05565	0.8839	1.12422	1.12749	-0.178045	0.168927	-0.00455878	0.173119
4	D8	NOD2	Targeted gene	896386	939918	918152	0.6408	0.6265	1.18181	1.07202	0.241002	0.100338	0.17067	2.48859e+06	2.22955e+06	2.35907e+06	0.22535	0.23195	0.07045	0.889591	0.830653	1.25741	-0.168786	-0.267683	-0.218235	0.330454
4	D9	CD22	Targeted gene	1.07853e+06	1.04147e+06	1.06e+06	0.7315	0.759	1.16855	1.12495	0.224725	0.169863	0.197294	1.85987e+06	1.87673e+06	1.8683e+06	0.18865	0.19905	0.05335	0.940337	0.900081	1.20233	-0.0887496	-0.151874	-0.120312	0.265835
4	D10	TAB2	Targeted gene	1.05874e+06	805549	932143	0.4152	0.5087	0.754251	0.857388	-0.406884	-0.22198	-0.314432	2.07175e+06	2.08734e+06	2.07954e+06	0.17295	0.18905	0.04585	0.774508	0.768023	0.928341	-0.368649	-0.380778	-0.374714	-0.107274
4	D12	no pulse/no RNP	No pulse control	1.02432e+06	955516	989916	1.1634	1.2688	1.99008	2.01369	0.992829	1.00984	1.00134	1.58424e+06	1.54725e+06	1.56574e+06	0.19245	0.20845	0.04745	1.14464	1.12473	1.276	0.194899	0.169574	0.182236	0.351631
4	E1	Non-targeting control-1	Non-targeting control	1.47393e+06	1.33243e+06	1.40318e+06	1.0864	0.9594	1.31104	1.0742	0.390715	0.10326	0.246988	1.68169e+06	1.43903e+06	1.56036e+06	0.14165	0.18525	0.04335	0.845406	1.003	1.16977	-0.242284	0.00431638	-0.118984	0.226226
4	E2	U2AF2	Essential control	1.1667e+06	1.08784e+06	1.12727e+06	1.0419	0.9424	1.56509	1.31342	0.646243	0.393334	0.519788	1.73637e+06	1.96726e+06	1.85181e+06	0.24505	0.31845	0.07115	1.23234	1.45281	1.61776	0.301401	0.538848	0.420125	0.693996
4	E3	RPE65	Neutral control	1.25371e+06	1.17236e+06	1.21304e+06	1.1558	1.0687	1.61343	1.38414	0.69013	0.468991	0.579561	2.09491e+06	1.97938e+06	2.03714e+06	0.21945	0.26595	0.06155	1.0032	1.10292	1.27216	0.00460791	0.141328	0.0729679	0.347282
4	E4	PRKCD	Targeted gene	1.02918e+06	917339	973258	0.5192	0.6504	0.903332	1.04991	-0.146671	0.0702617	-0.0382047	1.90793e+06	2.13166e+06	2.01979e+06	0.31645	0.20865	0.04505	1.45905	0.872724	0.939126	0.545033	-0.196402	0.174315	-0.0906095
4	E5	TAB3	Targeted gene	1.07075e+06	1.01628e+06	1.04352e+06	0.696	0.7444	1.12941	1.12074	0.175567	0.164454	0.170011	1.81238e+06	1.97341e+06	1.89289e+06	0.19195	0.19765	0.04205	0.944355	0.882137	0.935353	-0.0825993	-0.180925	-0.131762	-0.0964164
4	E6	IRAK3	Targeted gene	994663	862126	928394	0.6364	0.6358	1.16075	1.07594	0.215057	0.105592	0.160324	1.61006e+06	1.43515e+06	1.5226e+06	0.20895	0.22275	0.04245	1.27799	1.23594	1.17389	0.353881	0.305605	0.329743	0.231295
4	E7	NLRP2	Targeted gene	1.03346e+06	898291	965874	0.7568	0.7968	1.32679	1.29607	0.407938	0.374139	0.391039	2.59548e+06	2.12502e+06	2.36025e+06	0.21345	0.30085	0.06615	0.842193	1.07686	1.18007	-0.247777	0.106826	-0.0704756	0.238874
4	E8	Non-targeting control-2	Non-targeting control	1.06578e+06	1.04075e+06	1.05327e+06	0.7899	0.7678	1.26992	1.14527	0.344733	0.195689	0.270211	2.03203e+06	1.89923e+06	1.96563e+06	0.18645	0.25845	0.05785	0.883353	1.11081	1.23919	-0.178939	0.151615	-0.0136618	0.309397
4	E9	NLRC5	Targeted gene	921771	929828	925799	0.6962	0.8197	1.27338	1.39103	0.348663	0.476153	0.412408	2.4092e+06	2.25588e+06	2.33254e+06	0.24405	0.31385	0.08295	0.974368	1.13673	1.49735	-0.0374608	0.184895	0.073717	0.582412
4	E10	MPZL1	Targeted gene	1.18186e+06	959539	1.0707e+06	0.7813	0.7459	1.23564	1.09449	0.305258	0.130259	0.217758	1.65233e+06	1.54241e+06	1.59737e+06	0.25445	0.28735	0.07325	1.48344	1.51975	1.93081	0.568948	0.603832	0.58639	0.949203
4	E11	TLR4+TLR2 double KO	Targeted gene	1.05695e+06	972107	1.01453e+06	0.0565	0.0704	0.094303	0.10902	-3.40655	-3.19733	-3.30194	1.75378e+06	1.60285e+06	1.67831e+06	0.00365	0.00835	0.00155	0.0202532	0.0420319	0.0388861	-5.62571	-4.57237	-5.09904	-4.6846
4	F1	LMAN1	Targeted gene	847417	798407	822912	0.5038	0.5027	1.03668	0.95974	0.0519738	-0.0592837	-0.00365498	1.90916e+06	1.61055e+06	1.75985e+06	0.13605	0.15565	0.02955	0.719938	0.747202	0.706996	-0.474055	-0.420429	-0.447242	-0.500226
4	F2	LALBA	Neutral control	998010	819825	908917	0.5213	0.5857	0.97119	1.01239	-0.0421747	0.0177693	-0.0122027	2.61145e+06	1.74324e+06	2.17734e+06	0.20055	0.23625	0.05405	0.857766	0.916665	1.04521	-0.221344	-0.125534	-0.173439	0.0637969
4	F3	NLRP5	Targeted gene	850666	777195	813930	0.557	0.5203	1.1588	1.0043	0.212633	0.00619482	0.109414	1.57436e+06	1.33255e+06	1.45345e+06	0.20395	0.18625	0.03675	1.30676	1.08258	1.06461	0.385994	0.114476	0.250235	0.0903302
4	F4	FCER1G	Targeted gene	701990	640943	671466	0.4784	0.3717	1.20645	0.869694	0.270763	-0.20142	0.0346715	2.18337e+06	1.87305e+06	2.02821e+06	0.21655	0.23635	0.05965	0.994303	0.984484	1.23832	-0.00824238	-0.0225607	-0.0154015	0.308387
4	F5	TRHR	Neutral control	745176	695736	720456	0.4523	0.4021	1.06307	0.876849	0.0882304	-0.189599	-0.0506844	2.16208e+06	1.83149e+06	1.99678e+06	0.19365	0.22265	0.04745	0.90315	0.942014	1.00056	-0.146963	-0.0861798	-0.116571	0.00080127
4	F6	RHOA	Targeted gene	722821	625571	674196	0.6236	0.6448	1.56625	1.50258	0.647314	0.58744	0.617377	2.24007e+06	1.81143e+06	2.02575e+06	0.49705	0.57055	0.06515	2.28501	2.37943	1.35414	1.1922	1.25062	1.22141	0.437381
4	F7	IFIH1	Targeted gene	753348	712951	733149	0.4441	0.3973	1.02572	0.851382	0.036638	-0.232122	-0.0977419	2.06479e+06	1.90436e+06	1.98457e+06	0.23865	0.26455	0.07075	1.11987	1.12618	1.50105	0.163331	0.171432	0.167381	0.585972
4	F8	UNC93B1	Targeted gene	697836	680713	689274	0.573	0.4534	1.40768	1.03345	0.493317	0.0474624	0.27039	2.2822e+06	2.12679e+06	2.20449e+06	0.22185	0.30525	0.05935	0.937182	1.1698	1.13357	-0.0935993	0.226265	0.0663326	0.180872
4	F9	NOD1	Targeted gene	731300	711195	721247	0.451	0.3771	1.05885	0.82143	0.0824939	-0.283791	-0.100648	2.11444e+06	1.82329e+06	1.96886e+06	0.22435	0.27265	0.05585	1.06117	1.16992	1.19438	0.0856514	0.226407	0.156029	0.256266
4	F10	CD300E	Targeted gene	696045	636656	666350	0.634	0.4555	1.61112	1.07395	0.688063	0.102926	0.395494	2.15742e+06	1.91813e+06	2.03777e+06	0.26585	0.24095	0.06395	1.21494	0.998934	1.32136	0.280882	-0.0015394	0.139671	0.402022
4	F11	Cas9 only	Cas9 only control	855145	836663	845904	0.6782	0.6018	1.35762	1.11771	0.441078	0.160547	0.300812	2.2957e+06	2.07801e+06	2.18685e+06	0.65425	0.53225	0.05545	2.7861	2.05618	1.06762	1.47825	1.03997	1.25911	0.0944021
4	G1	SIGLEC8	Targeted gene	2.54095e+06	2.31295e+06	2.42695e+06	1.1058	1.0579	0.771536	0.684829	-0.374194	-0.546185	-0.460189	1.20618e+06	982903	1.09454e+06	0.09435	0.10565	0.01475	0.802756	0.815462	0.567409	-0.316966	-0.29431	-0.305638	-0.817538
4	G2	BCL3	Targeted gene	987909	847625	917767	0.6366	0.6405	1.17456	1.09644	0.23212	0.132827	0.182474	1.46056e+06	1.28177e+06	1.37116e+06	0.20145	0.19045	0.02995	1.36821	1.17343	0.919694	0.452284	0.230732	0.341508	-0.120774
4	G3	SIGLEC10	Targeted gene	1.01198e+06	849277	930627	0.8213	0.7184	1.4944	1.2128	0.579567	0.278341	0.428954	1.97624e+06	1.91155e+06	1.94389e+06	0.21755	0.20305	0.06385	1.04222	0.882462	1.38301	0.0596612	-0.180394	-0.0603663	0.467809
4	G4	SIGLEC9	Targeted gene	1.60236e+06	1.49311e+06	1.54774e+06	1.0408	0.9149	1.13871	0.928699	0.187394	-0.106717	0.0403388	1.85572e+06	1.48902e+06	1.67237e+06	0.21695	0.21705	0.03295	1.20809	1.09646	0.829582	0.272733	0.132855	0.202794	-0.269543
4	G5	PPP3R1	Targeted gene	1.02297e+06	739487	881227	0.4667	0.4316	0.89679	0.76947	-0.157157	-0.378062	-0.26761	2.00024e+06	1.94495e+06	1.97259e+06	0.15845	0.18015	0.04445	0.748045	0.771547	0.94879	-0.418803	-0.374175	-0.396489	-0.0758389
4	G6	KCNV1	Neutral control	783725	744943	764334	0.4525	0.3718	1.00248	0.764231	0.00357545	-0.38792	-0.192172	1.41682e+06	1.22269e+06	1.31975e+06	0.15805	0.18355	0.03365	1.11526	1.17497	1.07356	0.157376	0.232625	0.195	0.102409
4	G7	CD209	Targeted gene	902931	818402	860666	0.5717	0.4791	1.1248	0.87456	0.169665	-0.193371	-0.011853	2.23236e+06	1.99705e+06	2.1147e+06	0.19865	0.22385	0.05995	0.874807	0.894279	1.19365	-0.192963	-0.161203	-0.177083	0.255376
4	G8	SELL	Targeted gene	880700	860650	870675	0.427	0.3921	0.830449	0.707521	-0.268037	-0.499156	-0.383597	2.40184e+06	2.30639e+06	2.35411e+06	0.20045	0.22905	0.06085	0.792961	0.821994	1.08835	-0.334678	-0.282801	-0.308739	0.122145
4	G9	CD300LF	Targeted gene	790110	762291	776200	0.5573	0.5017	1.21578	1.01547	0.281886	0.0221523	0.152019	2.24362e+06	2.21466e+06	2.22914e+06	0.22275	0.19305	0.05675	0.93058	0.731641	1.07193	-0.103797	-0.450791	-0.277294	0.100206
4	G10	LGALS9C	Targeted gene	819939	875459	847699	0.5441	0.4883	1.08687	0.904989	0.120181	-0.144028	-0.0119235	1.78707e+06	1.65867e+06	1.72287e+06	0.17755	0.20945	0.04855	0.959714	1.02706	1.18651	-0.0593239	0.0385137	-0.0104051	0.24673
4	G11	Cas9 only	Cas9 only control	1.00199e+06	943239	972613	0.7634	0.5855	1.32909	0.945769	0.410434	-0.0804399	0.164997	1.85905e+06	1.75071e+06	1.80488e+06	0.66635	0.74615	0.03085	3.43817	3.49256	0.719686	1.78164	1.80428	1.79296	-0.47456
4	H1	TBK1	Targeted gene	578022	530811	554416	0.4397	0.4831	1.34295	1.36899	0.42541	0.453108	0.439259	820800	745431	783115	0.14025	0.07615	0.02855	1.66782	0.821504	1.53503	0.737967	-0.28366	0.227154	0.618266
4	H2	LGALS4	Targeted gene	555505	529459	542482	0.2223	0.282	0.693897	0.816699	-0.527207	-0.292123	-0.409665	1.06448e+06	955414	1.00994e+06	0.08125	0.09805	0.01005	0.749202	0.820192	0.418991	-0.416573	-0.285966	-0.35127	-1.25501
4	H3	REG1A	Targeted gene	598401	590662	594531	0.3997	0.3981	1.13841	1.052	0.187025	0.0731343	0.13008	868702	669450	769076	0.09775	0.07945	0.00785	1.18364	0.872751	0.42977	0.243234	-0.196358	0.023438	-1.21836
4	H4	MAG	Targeted gene	587953	572791	580372	0.4612	0.4162	1.34562	1.12666	0.428276	0.172056	0.300166	1.27113e+06	1.09267e+06	1.1819e+06	0.13155	0.11595	0.02975	1.03653	0.828812	1.05985	0.0517682	-0.270883	-0.109557	0.0838542
4	H5	CD93	Targeted gene	579172	571536	575354	0.4195	0.3195	1.23463	0.872437	0.304082	-0.196877	0.0536023	1.23566e+06	1.11028e+06	1.17297e+06	0.10105	0.10625	0.02465	0.802275	0.765258	0.884843	-0.317832	-0.385981	-0.351907	-0.176506
4	H6	TLR2	Targeted gene	743647	673345	708496	0.3236	0.3774	0.773414	0.836879	-0.370687	-0.256909	-0.313798	1.22625e+06	1.04159e+06	1.13392e+06	0.09575	0.11915	0.01365	0.786376	0.887723	0.506859	-0.34671	-0.171818	-0.259264	-0.980345
4	H7	DDX58	Targeted gene	680010	627746	653878	0.3756	0.3875	0.97268	0.931051	-0.0399636	-0.103068	-0.071516	1.64504e+06	1.45126e+06	1.54815e+06	0.13925	0.13545	0.02865	0.837637	0.739149	0.779198	-0.255603	-0.436063	-0.345833	-0.359937
4	H8	FREM1	Targeted gene	802997	734906	768951	0.4593	0.4537	1.01144	0.926975	0.016405	-0.109397	-0.0464961	1.13516e+06	1.04237e+06	1.08876e+06	0.11465	0.09945	0.02285	0.980649	0.771679	0.883667	-0.0281912	-0.373927	-0.201059	-0.178426
4	H9	TMEM173	Targeted gene	619103	572497	595800	0.3368	0.3663	0.957222	0.965906	-0.0630751	-0.0500456	-0.0565604	871354	823107	847230	0.08405	0.10725	0.01415	0.923867	1.06945	0.70322	-0.114243	0.096872	-0.00868549	-0.507953
4	H10	TAS2R9	Neutral control	705509	672582	689045	0.2308	0.5116	0.56719	1.16649	-0.818095	0.222174	-0.297961	1.02417e+06	877943	951054	0.13625	0.13875	0.02175	1.33415	1.23252	0.962919	0.41592	0.301609	0.358764	-0.0545134
4	H11	Cas9 only	Cas9 only control	1.08912e+06	919895	1.00451e+06	0.5329	0.6881	0.898326	1.07621	-0.154689	0.105961	-0.024364	1.501e+06	1.26274e+06	1.38187e+06	0.29335	0.38975	0.02535	1.97694	2.38279	0.772409	0.983266	1.25265	1.11796	-0.372564
