# Supplementary material for: CRISPR-based functional genomics in human dendritic cells
Source: eLife journal article supplement (doi:10.7554/elife.65856), 2021-04-27
Supplement: supp [file elife-65856-supp-v1.zip › elife_poa_e65856_Supplementary_file_4.xlsx]

## Sheet: screen_all_editing_results_for_
		outcome counts	outcome counts	outcome counts	outcome counts	outcome counts	outcome counts	outcome counts	outcome counts	fraction frameshifted	fraction frameshifted	fraction frameshifted	fraction frameshifted	fraction frameshifted	fraction frameshifted
			WT	simple indel	simple indel	simple indel	complex indel	genomic insertion	uncategorized and malformed layout	simple indel	simple indel	simple indel	complex indel	all indel reads	all on-target reads
		Total reads	WT	deletion <50 nt	deletion >=50 nt	insertion	multiple indels	hg19	uncategorized and malformed layout	deletion <50 nt	deletion >=50 nt	insertion	multiple indels
Donor h	ACAN	51994.4	1007	1538	25891.8	80.7601	14505.6	54.3367	8916.91	0.735975	0.740068	1	0.735381	0.7388	0.721508
Donor h	AIM2	10698.1	255	261.575	1212.38	4.04	928.791	1	8035.32	0.886778	0.301949	1	0.513435	0.448295	0.405348
Donor h	AKT1	51975.9	1264	23190.3	10448	520.781	10022.5	16.2296	6514.19	0.951342	0.836913	1	0.726889	0.873939	0.849632
Donor h	ALCAM	22025	326	4386.41	6294.24	294.82	3108.18	57.4799	7557.82	0.786018	0.861842	1	0.638284	0.791781	0.773868
Donor h	ALPK1	25443.1	1409	485.992	2952.01	48.4902	1224.5	7.4424	19315.6	0.86777	0.809662	1	0.793243	0.813348	0.626092
Donor h	ARHGEF2	21265.9	34	570.767	2619.02	1.01	8060.86	5.5297	9974.69	0.985032	0.894006	1	0.795004	0.827706	0.825213
Donor h	ASGR1	47541	178	5773.55	14026.2	88.87	24304.8	87.1615	3082.44	0.966659	0.72597	1	0.43975	0.600554	0.598145
Donor h	ASGR2	15380.3	335	510.325	3619.81	51.5908	2219.3	8.0266	8636.21	0.900907	0.865811	1	0.741781	0.826688	0.785575
Donor h	ATRN	46104.9	175	224.774	19964.8	91.88	15169.8	18.5563	10460.1	0.544708	0.638959	1	0.704375	0.667289	0.664011
Donor h	ATRNL1	28032.2	1938	6224.93	1650.71	24.2501	3205.37	22.2971	14966.6	0.108141	0.184295	1	0.822885	0.327709	0.279017
Donor h	BCAN	15501.2	2095	898.863	4618.31	138.35	291.518	2.5396	7456.66	0.867633	0.948157	1	0.690894	0.924581	0.683722
Donor h	BCL10	31529.6	615	9085.18	8195.16	62.54	7166.9	13.893	6390.91	0.308426	0.416817	1	0.772002	0.481987	0.470189
Donor h	BCL3	58736.4	8935	8843.9	8789.43	1635.25	2584.19	13.3171	27935.3	0.843197	0.609128	1	0.641275	0.736907	0.523047
Donor h	BIRC2	21666.4	40	560.912	10754.3	14.14	3088.02	6.8217	7202.18	0.941119	0.908281	1	0.675765	0.859847	0.857468
Donor h	BIRC3	12186.5	171	530.073	3806.28	19.18	3197.45	4.2283	4458.25	0.94109	0.330116	1	0.768636	0.560337	0.547932
Donor h	BLNK	38566.7	8161	1613.31	20278.7	70.6801	4318.25	87.808	4036.99	0.862769	0.841121	1	0.741868	0.826569	0.630714
Donor h	BTK	9216.55	223	151.56	2714.71	3.0502	565.813	9.4068	5549.01	0.835292	0.742659	1	0.637126	0.729592	0.685116
Donor h	CALCOCO2	94416.8	2713	65314.1	851.442	708.882	18777.5	206.742	5845.08	0.883546	0.647778	1	0.680713	0.837699	0.81198
Donor h	CALM1	31688.6	1089	516.745	12692.5	349.89	9785.09	37.7744	7217.59	0.854768	0.771575	1	0.666269	0.7327	0.700043
Donor h	CARD9	49417.2	4749	2507.5	28337.8	281.79	8323.07	70.4836	5147.54	0.836117	0.938662	1	0.826835	0.908989	0.811322
Donor h	CASP1	27022.7	3285	5418.27	2646.46	128.22	2295.23	21.6707	13227.8	0.948652	0.839609	1	0.740162	0.876139	0.667174
Donor h	CASP2	26350.9	44	792.879	8366.83	0	12320.8	22.5019	4803.9	0.110088	0.587437	0	0.79971	0.691573	0.690159
Donor h	CASP8	29775.8	587	3274.32	1713.69	83.9007	5085.49	13.5848	19017.8	0.979638	0.692291	1	0.82289	0.852848	0.806254
Donor h	CBLB	50452.8	3912	1569.94	32941.1	185.77	7949.21	48.9043	3845.87	0.79143	0.677294	1	0.662094	0.680068	0.622926
Donor h	CD14	19334.2	30	210.365	10575.8	11.11	4441.13	26.609	4039.22	0.895316	0.909422	1	0.652741	0.834486	0.832846
Donor h	CD180	66879.9	16600	15485.9	11890.2	581.763	17352.9	246.172	4723.01	0.888981	0.256537	1	0.575862	0.604527	0.442436
Donor h	CD1C	27819.7	2441	846.445	8200.05	149.373	5520.68	21.3399	10640.8	0.895254	0.915625	1	0.670904	0.823507	0.706347
Donor h	CD1D	40488.3	199	1270.08	10150.9	2.0301	22652.3	50.5667	6163.38	0.0708275	0.908365	1	0.728626	0.757667	0.753268
Donor h	CD207	31181	1341	1954.05	10202.2	43.5108	5116.96	41.8181	12481.5	0.933472	0.740683	1	0.613032	0.725369	0.673234
Donor h	CD209	83422.1	509	1837.58	44655.3	16.827	25183.3	5044.12	6175.96	0.243554	0.0928812	1	0.854175	0.364372	0.361804
Donor h	CD22	5295.02	31	12.4768	373.238	1.01	301.477	0.7798	4575.04	0.869005	0.906254	1	0.528825	0.740378	0.708465
Donor h	CD248	32891.9	7339	3669.82	9917.62	2962.59	2180.95	95.4592	6726.47	0.619644	0.529324	1	0.697675	0.641066	0.460599
Donor h	CD274	21075.8	42	2552.98	6642.96	11.1706	5253.14	18.2008	6555.31	0.957342	0.410314	1	0.614064	0.581367	0.579683
Donor h	CD276	36334.6	590	672.26	12839.5	41.4202	2910.32	13.0404	19268	0.912025	0.879767	1	0.508436	0.815745	0.787523
Donor h	CD300A	46164.1	3273	1355.11	18984.8	263.571	15780.9	38.5687	6468.25	0.85346	0.28979	1	0.729489	0.506637	0.464824
Donor h	CD300C	27228.2	325	3079.13	5988.91	34.3501	10727.4	73.7286	6999.71	0.754568	0.821048	1	0.667978	0.728228	0.716486
Donor h	CD300E	18303.1	153	126.315	5843.18	7.07	2401.55	7.6997	9764.29	0.822184	0.929087	1	0.616612	0.837966	0.822937
Donor h	CD300LB	19621	332	2980.19	3714.75	16.15	3897.03	34.9984	8645.88	0.480483	0.818405	1	0.742042	0.695695	0.674582
Donor h	CD300LF	22710	187	2853.64	3620.2	19.19	5469.57	17.1279	10543.3	0.464295	0.937895	1	0.712195	0.721824	0.710714
Donor h	CD302	39565.3	6365	3186.19	15230.8	526.051	2634.78	50.0861	11572.4	0.60919	0.916841	1	0.620577	0.837265	0.646547
Donor h	CD33	15625	141	1346	3247.07	0	5473.51	4.5433	5412.91	0.769538	0.935726	0	0.542686	0.699797	0.69013
Donor h	CD48	10286.3	30	72.1568	3990.68	0	2987.59	5.3703	3200.47	0.84179	0.196203	0	0.775336	0.448216	0.446316
Donor h	CD69	41305.3	225	244.797	14203.1	5.05	12224.3	11.8939	14391.1	0.885289	0.909322	1	0.771488	0.845959	0.838884
Donor h	CD72	8045	56	160.06	1957.15	9.8368	1595.56	4.9897	4261.4	0.947846	0.677128	1	0.766632	0.727984	0.717195
Donor h	CD83	22102.8	227	3681.95	3215.09	26.26	3421.6	3.5204	11527.4	0.904885	0.452815	1	0.720261	0.703563	0.688456
Donor h	CD93	14603.1	0	414.024	1972.87	0	1844.34	5.4659	10366.4	1	0.692092	0	0.463873	0.622743	0.622743
Donor h	CDC42	47178.8	23529	2894.92	2919.22	268.711	75.1857	104.701	17387.1	0.824202	0.51975	1	0.645661	0.685367	0.142167
Donor h	CEBPB	13698.2	5	67.4883	4277.83	2.0301	2952.92	57.6452	6335.31	0.907418	0.910893	1	0.74083	0.842096	0.84152
Donor h	CHID1	17895.4	334	1186.49	8243.05	26.24	4000.12	31.1496	4074.31	0.755659	0.92777	1	0.48146	0.780058	0.761164
Donor h	CHODL	62716	7644	4844.99	16766.3	279.922	6181.88	20.0309	26978.9	0.844941	0.932114	1	0.670165	0.860063	0.675996
Donor h	CHUK	23172.4	2036	3594.08	8950.7	67.2643	4947.42	23.6984	3553.19	0.188963	0.946407	1	0.783166	0.745585	0.668117
Donor h	CLC	44649.4	11395	2021.07	11872.5	498.761	3285.13	40.7158	15536.3	0.699458	0.489694	1	0.720338	0.570937	0.347157
Donor h	CLEC10A	43317.1	726	1681.64	16541.6	65.8016	11101.8	79.3944	13120.9	0.91848	0.625451	1	0.510939	0.599801	0.585342
Donor h	CLEC11A	15159.9	4155	788.297	1953.21	44.4703	396.368	31.1906	7791.33	0.782025	0.843649	1	0.76605	0.820904	0.356041
Donor h	CLEC12A	34466.5	335	2489.12	13437.5	43.4907	6464.65	25.2685	11671.5	0.348111	0.854222	1	0.724475	0.760965	0.749769
Donor h	CLEC12B	10601.3	1770	1018.45	2655.94	21.21	1327.52	16.5122	3791.62	0.915353	0.599898	1	0.763321	0.708736	0.52407
Donor h	CLEC14A	43860.8	17032	3297.61	12556.6	549.552	3107.63	71.1593	7246.28	0.856241	0.506851	1	0.701737	0.610831	0.326137
Donor h	CLEC16A	53929.6	1396	15492.9	16503.3	39.3901	9678.16	21.3083	10798.5	0.995674	0.627261	1	0.693986	0.779927	0.754671
Donor h	CLEC17A	51125.7	391	220.645	21596.8	24.24	13129.7	34.2264	15729	0.673243	0.885384	1	0.635583	0.79034	0.781601
Donor h	CLEC18A	81078.7	77202	1409.08	0	136.33	0	122.231	2209.09	0.828174	0	1	0	0.843332	0.0165503
Donor h	CLEC18B	104984	88300	9118.52	0	746.563	0	33.7062	6785.34	0.776912	0	1	0	0.793794	0.0797722
Donor h	CLEC18C	139987	115167	20243.2	15.8788	1174.6	0	290.997	3094.86	0.771681	0	1	0	0.783622	0.122956
Donor h	CLEC19A	15590.3	1716	1147.22	2118.24	73.6801	2143.21	30.3588	8361.61	0.39001	0.647112	1	0.824131	0.667256	0.50819
Donor h	CLEC1A	130431	6929	54662.4	39672.2	701.71	21820.9	95.8984	6548.87	0.966571	0.734692	1	0.61715	0.822803	0.776746
Donor h	CLEC1B	75513.3	1534	691.735	45349.9	256.441	24023.3	236.987	3420.92	0.869638	0.634164	1	0.818672	0.700847	0.685885
Donor h	CLEC20A	21041.5	731	299.632	10163.3	25.2601	4805.8	15.9849	5000.51	0.816389	0.630503	1	0.748005	0.671677	0.641038
Donor h	CLEC2A	7777.74	38	62.5628	3718.06	3.03	950.308	10.7121	2995.07	0.872063	0.784346	1	0.690639	0.766832	0.760726
Donor h	CLEC2B	19534.5	2201	600.795	8649.34	124.524	3759.29	37.4254	4162.13	0.803253	0.63256	1	0.620204	0.640315	0.548412
Donor h	CLEC2D	5278.23	2	0.9901	1199.93	0	754.347	4.589	3316.37	1	0.810001	0	0.60809	0.7322	0.731451
Donor h	CLEC2L	51408.2	1569	2205.47	28321.7	70.7306	11578.6	49.8401	7612.85	0.907317	0.574649	1	0.644383	0.611902	0.589955
Donor h	CLEC3A	72490.1	5720	12534	34375.2	79.9113	6306.2	29.2854	13445.5	0.907709	0.660417	1	0.725918	0.726835	0.656387
Donor h	CLEC3B	21061	189	3559.02	3463.63	21.2101	6119.3	24.9461	7683.86	0.797893	0.9418	1	0.453622	0.67604	0.666471
Donor h	CLEC4A	14141.7	1082	487.948	7300.02	62.62	3551.08	7.9034	1650.13	0.875102	0.844244	1	0.807483	0.834971	0.762601
Donor h	CLEC4C	49237.2	181	253.046	19441.4	12.1402	22368	39.4442	6942.21	0.806704	0.439196	1	0.622526	0.539031	0.536722
Donor h	CLEC4D	45074.9	7345	1195.39	21511.3	421.04	10782.7	39.3658	3780.11	0.614854	0.16938	1	0.724474	0.371903	0.305691
Donor h	CLEC4E	67606.8	5792	6402.65	31719.9	283.77	19624.5	76.2791	3707.75	0.600049	0.894128	1	0.621572	0.770028	0.700147
Donor h	CLEC4F	44747.1	7022	10775.6	10917.3	214.211	10913.3	88.2181	4816.51	0.97848	0.357811	1	0.658285	0.665692	0.548368
Donor h	CLEC4G	19679.5	150	125.66	5015.44	3.03	3866.33	24.2655	10494.8	0.728979	0.904616	1	0.709226	0.818358	0.804958
Donor h	CLEC4M	37262	1924	5089.86	12065.5	55.5704	13489.9	40.2094	4596.98	0.149681	0.0843941	1	0.790827	0.407281	0.383262
Donor h	CLEC5A	55924.7	9889	3841.9	23086.7	426.312	9675.11	93.1846	8912.51	0.762251	0.595717	1	0.722957	0.650895	0.513707
Donor h	CLEC6A	15815.5	115	23.8866	5486.14	0	6793.11	45.4517	3351.89	0.91993	0.133049	0	0.770194	0.486373	0.481869
Donor h	CLEC7A	60911.3	4773	1978.76	21905.7	240.4	20043.3	45.5543	11924.6	0.894807	0.760942	1	0.485544	0.643266	0.580531
Donor h	CLEC9A	137388	1999	5983.02	93886.3	452.321	30808.2	133.987	4125.53	0.923778	0.307422	1	0.605972	0.408076	0.401948
Donor h	CLECL1	24028.3	1	30.6539	7448.01	9.09	4930.49	58.2809	11550.8	0.873347	0.802333	1	0.743432	0.779267	0.779205
Donor h	COLEC10	9316.15	161	263.168	1221.51	19.1901	571.226	1.7823	7078.27	0.166341	0.830592	1	0.82614	0.746691	0.692929
Donor h	COLEC11	101987	34409	38272.3	15125.9	810.308	4889.06	240.909	8239.48	0.135683	0.0756736	1	0.835297	0.190053	0.120116
Donor h	COLEC12	29362.8	4805	15992.7	2754.01	245.34	1573.42	53.5912	3938.79	0.969435	0.790635	1	0.665525	0.922604	0.747869
Donor h	CREB1	176778	1660	30970.7	97192.7	109.1	43300.4	64.1514	3481.22	0.986282	0.599334	1	0.66753	0.686648	0.680068
Donor h	CRX-1	45000.9	2296	4463.08	22158.9	133.3	6053.48	66.3647	9829.83	0.851236	0.389682	1	0.625998	0.498551	0.465943
Donor h	CRX-2	51822.8	9860	5787.04	18376	278.73	4283.42	15.2235	13222.4	0.890267	0.369389	1	0.662607	0.524169	0.390224
Donor h	CRX-3	148594	3433	20357.7	89425.3	341.25	25657.8	343.36	9035.65	0.909735	0.356522	1	0.676136	0.501477	0.489111
Donor h	CRX-4	56264.4	2027	5965.92	25960.9	225.241	7453.05	45.8629	14586.5	0.890635	0.317817	1	0.661263	0.472614	0.449603
Donor h	DDX3X	17640.2	27	47.3288	4794.05	0	6997.65	26.0788	5748.13	0.894041	0.179968	0	0.901909	0.609538	0.608151
Donor h	DDX58	44459.9	211	7434.41	9565.4	88.8702	13683	6.2898	13470.9	0.0913957	0.494279	1	0.787161	0.528637	0.525037
Donor h	DGCR2	2588.1	140	518.729	1296.05	3.03	348.469	1.3964	280.435	0.929991	0.690772	1	0.663031	0.744025	0.698859
Donor h	DHX58	19521.2	646	1157.01	3635.5	70.7104	3774.58	14.0901	10223.3	0.656052	0.827363	1	0.623345	0.716677	0.666808
Donor h	ECSIT	55309.2	2290	20409.1	21770.1	99.9901	5238.88	88.5412	5412.57	0.962259	0.683578	1	0.631705	0.798219	0.76152
Donor h	F13B-1	50866.9	6661	9253.69	17194.3	237.387	8799.4	85.8599	8635.22	0.712339	0.883794	1	0.623246	0.77525	0.652724
Donor h	F13B-2	52548.7	9645	8782.95	16794.9	277.811	9059.57	71.825	7916.62	0.677563	0.89074	1	0.612085	0.765681	0.59995
Donor h	F13B-3	50463.8	8579	11201.4	16223.9	194.931	8541.01	71.6813	5651.93	0.663973	0.855899	1	0.60532	0.73804	0.59652
Donor h	F13B-4	41157.5	5380	10119.6	13444.7	236.774	5527.53	47.0723	6401.92	0.709282	0.885839	1	0.626098	0.776888	0.656466
Donor h	FADD	32957.9	897	1813.98	13889.6	51.48	11975.5	22.5416	4307.73	0.935788	0.431359	1	0.578282	0.52886	0.512289
Donor h	FCER1A	28174.2	1377	855.346	16100	95.9603	4773.49	35.1765	4937.22	0.885584	0.747113	1	0.72342	0.748469	0.704049
Donor h	FCER1G	112878	199	812.9	46485.3	48.45	60970.4	128.634	4233.08	0.274988	0.937919	1	0.516741	0.695895	0.694619
Donor h	FCER2	33941.5	80	22.4989	9931.25	2.02	16150.8	63.924	7690.99	0.306739	0.955332	1	0.394104	0.607573	0.605717
Donor h	FCGR1A	55042.7	5708	7655.38	0	4152.77	8.6558	61.4874	37456.4	0.947655	0	1	0	0.965357	0.650931
Donor h	FCN1	118487	5730	18233.3	55236.3	4911.79	27552.4	538.517	6284.76	0.788098	0.904257	1	0.693758	0.833954	0.79116
Donor h	FCN2	50202.3	6814	9944.09	23489.8	97.95	6284.08	68.7083	3503.74	0.805348	0.35982	1	0.792647	0.540979	0.461926
Donor h	FCN3	27509.6	170	4795.65	8225.17	0	8356.58	8.801	5953.44	0.959233	0.878387	0	0.737409	0.841414	0.834776
Donor h	FREM1	34393.1	4523	1452.21	13095.3	191.011	3360.65	40.256	11730.6	0.842778	0.688924	1	0.726045	0.711444	0.5692
Donor h	HAVCR2	61717.8	6269	6953.1	16046.8	109.1	26599	58.9816	5681.78	0.382707	0.936636	1	0.746868	0.757746	0.672885
Donor h	HMGB1	57487.1	117	44745.2	0	1909.62	20.5863	114.312	10580.5	0.859781	0	1	1	0.86558	0.863416
Donor h	IFIH1	85764.2	130	42368	15466.5	0	22351	84.0577	5364.58	0.179814	0.945003	0	0.739273	0.483351	0.482569
Donor h	IGSF6	28378.9	119	90.7083	12455.2	8.0801	9748.26	34.7162	5922.86	0.947983	0.362008	1	0.633987	0.483504	0.480938
Donor h	IKBKG	29917.9	43	30.6252	7797.32	48.48	10553.3	58.0571	11387.1	0.968307	0.199997	1	0.827133	0.562491	0.561182
Donor h	IL10	40531	519	1664.69	17886.7	347.3	10272.6	18.8606	9821.9	0.873476	0.830826	1	0.660627	0.777178	0.764035
Donor h	IL1B	23139	1865	5077.62	6328.53	225.21	3710.1	42.3691	5890.13	0.948295	0.355066	1	0.817544	0.67272	0.599804
Donor h	IL1RL1	10317.3	318	793.852	1375.6	21.2403	1382.12	0.8277	6425.69	0.890381	0.764995	1	0.599859	0.730371	0.670677
Donor h	IRAK1	25656.8	74	208.638	14788.6	29.2901	6674.06	57.2098	3824.99	0.795524	0.60489	1	0.693611	0.634542	0.632386
Donor h	IRAK3	50472.2	72	559.001	26657.7	65.64	17400.1	138.393	5579.38	0.894636	0.226285	1	0.701536	0.420854	0.420177
Donor h	IRAK4	66585.3	9034	3494.43	38157.8	1152.5	11777.6	144.779	2824.16	0.795484	0.653713	1	0.660236	0.671509	0.57615
Donor h	IRF1	10452.9	542	157.617	4443.87	0	2908.2	7.4743	2393.73	0.772004	0.852867	0	0.684297	0.78589	0.732987
Donor h	IRF3	87264.2	2066	4750.47	54111.7	607.853	17607.2	137.586	7983.43	0.864552	0.597565	1	0.698931	0.640349	0.623633
Donor h	IRF7	19533.1	82	798.242	7590.16	4.0501	5710.31	108.341	5239.98	0.930909	0.639172	1	0.591275	0.636395	0.632716
Donor h	JUN	2830.48	53	760.095	610.729	8.07	1083.53	3.0176	312.036	0.2634	0.734996	1	0.816173	0.626013	0.612823
Donor h	KCNV1-1	14505.2	501	161.998	3801.15	19.2103	2021.34	2.1686	7998.32	0.847575	0.710886	1	0.781795	0.739373	0.682425
Donor h	KCNV1-2	17402.3	1339	362.564	4836.12	32.31	2791.31	6.9255	8034.06	0.836227	0.703597	1	0.797915	0.743602	0.637241
Donor h	KCNV1-3	16903.8	1423	436.159	4334.08	27.2802	2353.32	7.0947	8322.91	0.828828	0.751598	1	0.7811	0.766965	0.639672
Donor h	KCNV1-4	18770.8	1329	444.284	5050.59	14.11	2414.61	17.851	9500.39	0.785558	0.743209	1	0.777251	0.756415	0.647767
Donor h	KLRB1	17202.6	47	46.9353	7141.53	5.1515	8414.26	12.4138	1535.34	0.74686	0.835133	1	0.439123	0.621432	0.619566
Donor h	KLRC1	29099.3	119	463.498	9160.24	12.11	9038.91	24.1585	10281.4	0.968194	0.722539	1	0.75187	0.743013	0.738308
Donor h	KLRC2	16755.4	7046	2353.44	0	94.9703	0.9803	46.2159	7213.82	0.916307	0	1	1	0.919586	0.237212
Donor h	KLRC3	37649.1	19261	4305.68	2924.14	658.452	972.235	584.776	8942.8	0.921376	0.808621	1	0.606189	0.855423	0.269526
Donor h	KLRC4	66186.8	2796	9391.96	43635.4	1005.25	6398.61	305.322	2654.23	0.767339	0.753575	1	0.715147	0.755745	0.722325
Donor h	KLRD1	47733.9	2841	13872.6	12409	360.793	8751.53	8.9105	9490.04	0.980268	0.963882	1	0.319702	0.811392	0.751103
Donor h	KLRF1	36327	625	826.915	20789.8	213.201	9923.25	70.4457	3878.39	0.752943	0.663337	1	0.604889	0.649666	0.637125
Donor h	KLRF2	24985.1	809	304.064	764.154	84.9111	432.095	0.9268	22590	0.854535	0.841411	1	0.650689	0.800437	0.529972
Donor h	KLRG1	9488.52	634	437.852	2817.46	38.3801	1458.28	24.8334	4077.71	0.91683	0.886633	1	0.595505	0.80099	0.706703
Donor h	KLRG2	20902.7	1244	1027.89	8771.71	57.5601	5244.85	12.1601	4544.52	0.83089	0.859837	1	0.800135	0.837667	0.773917
Donor h	KLRK1	89542.3	223	294.725	50515.9	15.1601	23912.9	158.577	14422	0.7337	0.224452	1	0.637123	0.358653	0.357586
Donor h	KSR1	51173.1	813	5726.09	27219.6	156.52	12407.6	84.7499	4765.54	0.367835	0.810956	1	0.885487	0.776172	0.76255
Donor h	LALBA-1	42065.4	2559	3184.61	18927.6	402.838	12662.4	34.0795	4294.85	0.54656	0.854943	1	0.690303	0.769423	0.717247
Donor h	LALBA-2	46121.9	6123	5656.72	14676.7	837.071	8939.62	68.3408	9820.48	0.56048	0.874998	1	0.694716	0.76586	0.636438
Donor h	LALBA-3	47916.9	10293	4809.1	16260.8	825.256	11282.8	59.8378	4386.19	0.514168	0.880686	1	0.709477	0.772304	0.589439
Donor h	LALBA-4	113802	1952	8139.72	52256.4	639.211	38493.8	148.856	12171.9	0.406859	0.862469	1	0.706201	0.765653	0.750926
Donor h	LAYN	46881.2	2939	8324.81	17217.8	636.524	7805.75	39.1684	9918.19	0.946865	0.858653	1	0.774621	0.863608	0.794868
Donor h	LBP	28034.6	1174	19041.4	689.748	161.51	2004.87	89.4698	4873.58	0.169286	0.192149	1	0.580006	0.213738	0.202861
Donor h	LCP2	17932.9	82	1076.21	1805.5	0	2012.53	3.593	12953	0.835306	0.724925	0	0.589144	0.693363	0.681938
Donor h	LGALS1	39782.6	3127	2962.36	17018	246.572	9527.18	71.1656	6830.31	0.881412	0.807562	1	0.617914	0.755784	0.683909
Donor h	LGALS12	21018	755	2531.35	6033.23	106.01	5325.44	14.5996	6252.39	0.963348	0.497176	1	0.309352	0.513831	0.487532
Donor h	LGALS13	89008	15702	30162.5	27731	301.86	9255.91	217.19	5637.56	0.947563	0.74992	1	0.725711	0.836098	0.678216
Donor h	LGALS14	38687.8	1862	2992.15	24329.1	81.7803	4618.62	74.6336	4729.5	0.875899	0.885632	1	0.617458	0.846334	0.799826
Donor h	LGALS16	47571.4	7651	1902.25	27794.8	345.602	3361.3	90.694	6425.77	0.467407	0.628368	1	0.705924	0.630851	0.513286
Donor h	LGALS2	34855.6	1230	1777.33	16541.8	221.241	2569.9	27.3419	12488	0.866832	0.674577	1	0.689331	0.69597	0.657652
Donor h	LGALS3	38660.1	962	1664.04	10060.2	284.821	9860.81	41.8562	15786.3	0.861051	0.421535	1	0.623931	0.553768	0.530435
Donor h	LGALS4	28775.2	5433	12284.7	882.193	753.461	386.049	11.3284	9024.48	0.961411	0.526214	1	0.74524	0.930774	0.674591
Donor h	LGALS7	109570	84563	17879.6	6.5571	1224.81	14.2624	64.4452	5817.01	0.859318	1	1	1	0.868481	0.16019
Donor h	LGALS7B	180479	119315	44657.4	50.6276	4425.63	5.7476	294.042	11731	0.823303	0.453142	1	0.672211	0.838818	0.244689
Donor h	LGALS8	51793.1	2520	7894.01	25418	90.89	10912.8	47.5035	4909.83	0.934061	0.237875	1	0.7187	0.481854	0.455928
Donor h	LGALS9	45425.7	1809	6324.89	13798.4	251.45	13609	743.791	8889.16	0.494644	0.862992	1	0.666236	0.716658	0.680437
Donor h	LGALS9B	58533.6	15132	9904.16	0	1145.92	0	14.6341	32336.9	0.938831	0	1	0	0.945175	0.398908
Donor h	LGALS9C	88345.8	10726	65865.5	10.836	2500.08	35.3419	114.702	9093.31	0.958188	0	1	0.759306	0.959462	0.82942
Donor h	LMAN1	96428.3	35	202.432	30153.2	33.3402	62938.9	32.4691	3032.97	0.882296	0.439874	1	0.539	0.507883	0.507692
Donor h	LMAN1L	49766.2	6804	1048.14	28704.3	27.26	8616.94	93.6747	4471.9	0.945205	0.87352	1	0.741169	0.845865	0.718538
Donor h	LMAN2	27161.3	248	1790.52	7888.3	4.03	6816.86	51.1286	10362.4	0.511752	0.863944	1	0.733885	0.772024	0.760592
Donor h	LMAN2L	35995.6	1894	1658.32	22007.1	94.0716	7206.19	31.9384	3103.97	0.824806	0.737903	1	0.660106	0.725249	0.683446
Donor h	LSP1	12392.9	118	577.394	3910.51	10.528	3115.72	78.6532	4582.11	0.887316	0.9606	1	0.462878	0.751429	0.739961
Donor h	LY75	39620.9	1371	559.537	20593.2	121.231	12046.7	30.3174	4898.86	0.778632	0.803604	1	0.576274	0.721711	0.693189
Donor h	LY86	115794	584	1555.01	58932.7	14.14	48176.9	442.392	6089.06	0.976427	0.692331	1	0.744135	0.719401	0.715556
Donor h	LY9	82177.3	233	10488.6	24975.9	64.6301	28440.9	97.871	17876.4	0.273329	0.928278	1	0.717067	0.72706	0.724422
Donor h	LY96	47528.2	147	368.053	5746.85	4.04	19496.1	11.3958	21754.8	0.937383	0.652398	1	0.592981	0.611324	0.607836
Donor h	MAG	19276.1	61	2298.71	3904.53	10.1	6126.15	14.7526	6860.88	0.146221	0.865482	1	0.838765	0.718337	0.714804
Donor h	MALT1	12289.2	518	1848.72	3567.09	14.12	3916.29	9.0331	2415.95	0.134036	0.238346	1	0.794896	0.452072	0.428332
Donor h	MAP3K1	26773.2	627	12407.7	5102.36	144.602	3099.49	58.0896	5333.99	0.907501	0.441171	1	0.72426	0.766134	0.743667
Donor h	MAP3K14	20991.4	654	175.225	3615.85	30.3102	2174.48	0.3483	14341.2	0.852742	0.48876	1	0.693247	0.576142	0.51948
Donor h	MAP3K7	43848.8	6789	2010.84	22659.1	209.212	6593.31	44.7197	5542.64	0.84107	0.963729	1	0.760942	0.913651	0.751535
Donor h	MAP3K8	48707.5	5968	4285.16	17802.5	121.17	17784.8	96.4931	2649.41	0.910419	0.325314	1	0.420591	0.432419	0.37627
Donor h	MAPK14	34968.3	277	23773.6	2525.73	58.57	5190.56	12.9259	3129.98	0.945697	0.902391	1	0.643503	0.892612	0.884843
Donor h	MARCO	28613.3	2493	3264.35	5672.98	94.9102	7252.79	24.0069	9811.27	0.915213	0.737806	1	0.725917	0.7696	0.667427
Donor h	MAVS	95382.8	8972	11481.1	55996.4	313.81	11928	200.093	6491.38	0.929662	0.912283	1	0.737866	0.889034	0.799099
Donor h	MB21D1	11227.2	221	264.9	3507.63	0	5374.86	18.0047	1840.82	0.886559	0.757814	0	0.472009	0.593608	0.579605
Donor h	MBL2	30739.4	530	384.36	11574.2	11.1201	5572.38	13.5782	12653.7	0.896493	0.636027	1	0.71674	0.667604	0.648025
Donor h	MPZL1	42152.7	236	8359.23	6805.38	133.503	4011.02	17.8692	22589.7	0.144749	0.978057	1	0.880123	0.597113	0.589903
Donor h	MRC1	47494.7	4313	7688.49	24689.4	1183.79	5542.72	85.1625	3992.13	0.809393	0.931708	1	0.604907	0.863405	0.777636
Donor h	MRC2	49410.1	5494	2025.16	19159	300.122	11956	23.5919	10452.3	0.861901	0.658612	1	0.756859	0.709114	0.609051
Donor h	MYD88	25091.9	130	26.8422	10860.1	5.0601	7424.63	25.8912	6619.38	0.832491	0.130167	1	0.819141	0.410712	0.407817
Donor h	NCAN	30310.7	1265	3706.23	15889.4	230.381	3064.96	56.078	6098.65	0.222879	0.308666	1	0.800913	0.367643	0.34839
Donor h	NFKB1	31648.1	273	301.875	14531.5	106.01	11109.7	16.1422	5309.99	0.833799	0.977683	1	0.293966	0.684507	0.677408
Donor h	NFKB2	29671.4	2993	3742.75	9153.11	352.562	3408.05	14.8992	10007.1	0.751998	0.298189	1	0.64707	0.4864	0.412312
Donor h	NFKBIA	20013.9	4406	7253.16	146.384	262.52	2872.16	61.2269	5012.45	0.894257	0.542072	1	0.813027	0.869851	0.613324
Donor h	NLRC3	18263.4	768	1030.57	9986.51	125.11	1959.66	31.8123	4361.77	0.84758	0.310138	1	0.760393	0.426345	0.402737
Donor h	NLRC4	54492.9	7902	30587.8	6463.04	289.902	4777.35	44.139	4428.71	0.127772	0.598144	1	0.741388	0.275555	0.232024
Donor h	NLRC5	61800	12317	5482.57	26202.9	575.216	3563.8	52.1496	13606.4	0.890917	0.953482	1	0.846833	0.934045	0.695069
Donor h	NLRP1	104583	145	38748	32427.9	50.49	28328.8	202.624	4680.69	0.0284144	0.972486	1	0.70318	0.528425	0.527656
Donor h	NLRP10	25715.2	9597	1750.72	5563.09	49.5305	637.483	12.6181	8104.75	0.826897	0.905385	1	0.609767	0.865242	0.393381
Donor h	NLRP11	23333.1	3578	2619.75	10190.2	89.8904	1733.47	27.1098	5094.71	0.961059	0.19862	1	0.72672	0.402599	0.3235
Donor h	NLRP12	29904.9	346	1390.85	11106	120.17	9866.9	55.246	7019.72	0.783582	0.508051	1	0.633703	0.582866	0.574032
Donor h	NLRP13	26201	2816	4516.8	7303.37	51.5201	6032.48	39.6396	5441.2	0.519649	0.232241	1	0.797342	0.497357	0.429763
Donor h	NLRP14	112377	3868	3177.35	67719.2	297.132	33291.8	465.187	3558.04	0.904714	0.211679	1	0.710178	0.39383	0.379772
Donor h	NLRP2	67424.7	531	714.87	32763.4	48.47	23892.1	101.016	9373.8	0.839986	0.965772	1	0.39511	0.726781	0.720122
Donor h	NLRP2B	99702.2	35892	18463.3	33921.5	1045.36	3296.31	113.681	6970.03	0.925324	0.532762	1	0.734895	0.680889	0.417028
Donor h	NLRP3	106202	16390	8903.52	44621.9	6362.33	10307	120.75	19496.7	0.659186	0.854234	1	0.781736	0.832061	0.674557
Donor h	NLRP4	54750.6	15075	3137.67	27918	339.26	3273.72	73.8127	4933.15	0.776517	0.751868	1	0.817161	0.762692	0.531556
Donor h	NLRP5	192109	95910	16167.5	68970.5	2343.58	2743.88	341.779	5631.23	0.745026	0.446897	1	0.725721	0.523165	0.253594
Donor h	NLRP6	19946.9	54	2492.32	2333.78	6.06	6993.75	20.9289	8046.07	0.984884	0.712922	1	0.719696	0.774391	0.770871
Donor h	NLRP7	77799.4	19785	11950.3	25489.5	1545.48	15000.6	151.243	3877.36	0.890585	0.749477	1	0.648781	0.759905	0.556102
Donor h	NLRP8	49281.1	20450	11366.8	11540.5	142.3	1528.53	141.835	4111.15	0.42602	0.850547	1	0.755151	0.649146	0.354329
Donor h	NLRP9	23483	273	178.943	7960.4	13.12	1380.75	18.9133	13657.9	0.824016	0.605183	1	0.739205	0.629245	0.611727
Donor h	NLRX1	33564.1	600	1342.93	15306.2	85.8	9092.73	28.982	7107.45	0.915693	0.893679	1	0.648165	0.808743	0.790382
Donor h	NOD1	16875.9	157	252.104	4619.64	154.49	5995.02	9.8191	5687.86	0.888802	0.778576	1	0.449862	0.605397	0.596894
Donor h	NOD2	33216.7	693	572.884	5959.48	13.1401	14071.2	21.6972	11885.3	0.906134	0.347131	1	0.76621	0.649108	0.627999
Donor h	OLR1	16201.5	85	299.116	1841.98	18.17	2034.14	4.2982	11918.8	0.884244	0.237059	1	0.765428	0.54283	0.532045
Donor h	OR2D2-1	43253.8	15213	12127.8	3496.56	256.52	2413.18	60.2487	9686.5	0.971203	0.92527	1	0.420966	0.890246	0.486053
Donor h	OR2D2-2	46075.4	13585	15337.9	3146.93	347.502	2862.49	54.5583	10741	0.966227	0.892009	1	0.438983	0.886436	0.545101
Donor h	OR2D2-3	47107.5	7194	22050.5	4078.7	405.941	3956.88	51.8076	9369.62	0.975519	0.886146	1	0.419488	0.891736	0.721509
Donor h	OR2D2-4	175854	65611	82488.1	11130.6	2086.53	8492.54	275.148	5769.67	0.971915	0.90744	1	0.435153	0.921842	0.565659
Donor h	OR51T1-1	42083.2	3888	1870.64	25968.4	265.56	8765.06	24.46	1301.04	0.854782	0.763816	1	0.79706	0.778036	0.703816
Donor h	OR51T1-2	111675	20614	6467.71	60709.5	844.302	18574.7	181.488	4283	0.841244	0.72712	1	0.782501	0.750183	0.60594
Donor h	OR51T1-3	49443.9	7270	3342.2	27224.9	414.182	8579.73	43.6248	2569.28	0.825563	0.73426	1	0.791602	0.757191	0.639646
Donor h	OR51T1-4	52704.4	6906	2947.94	28761.8	381.801	9053.15	75.7897	4577.89	0.784716	0.756958	1	0.773083	0.76475	0.654838
Donor h	PAK1	33631.7	564	2023.05	12839	86.8501	12297.3	43.9619	5777.48	0.360187	0.902359	1	0.866353	0.846163	0.829003
Donor h	PIK3CD	28895.6	4642	1641.34	14307	148.43	2772.01	17.1502	5367.66	0.755685	0.29336	1	0.691288	0.397594	0.319093
Donor h	PIK3CG	34683.8	156	17708.6	4520.4	1.01	4960.98	58.5038	7278.37	0.967182	0.243425	1	0.665185	0.791762	0.787246
Donor h	PILRA	35376.7	73	200.286	17968	2.02	11306.5	17.9336	5808.96	0.872095	0.906277	1	0.813354	0.870409	0.868259
Donor h	PKD1	147548	1234	103932	29110.4	88.9206	8618.55	223.266	4341.06	0.899782	0.952343	1	0.657859	0.89593	0.888198
Donor h	PKD1L3	35699.9	785	1340.17	19521	133.391	3795.99	32.8299	10091.6	0.827936	0.822285	1	0.770924	0.815682	0.790646
Donor h	PLA2R1	19829.7	1882	798.595	7473.94	184.75	3787.01	47.2139	5656.22	0.673146	0.083496	1	0.769163	0.347851	0.301508
Donor h	PLCG1	22606.4	159	3178.17	5376.73	49.48	7418.42	35.4827	6389.12	0.80396	0.668365	1	0.548123	0.640614	0.634319
Donor h	PLCG2	23320	8948	7214.15	1832.31	68.6704	193.696	102.884	4960.33	0.756015	0.973447	1	0.668393	0.79879	0.407289
Donor h	POLR2A-1	37608.1	2563	1188.81	16480.4	32.421	14072	103.526	3167.88	0.769198	0.52071	1	0.714062	0.616128	0.570138
Donor h	POLR2A-2	38520	591	709.81	18129.9	43.41	15826.7	28.2339	3191.03	0.793183	0.505373	1	0.725311	0.612163	0.601914
Donor h	POLR2A-3	32669.7	98	383.974	15049.8	14.1501	13777.7	15.3652	3330.8	0.509031	0.586565	1	0.746444	0.661117	0.658908
Donor h	POLR2A-4	36536.5	597	1478.31	18447.2	35.441	12175.2	49.1939	3754.16	0.663184	0.564947	1	0.712711	0.625928	0.614512
Donor h	PPP3R1	19564.9	143	740.258	2970.54	79.7931	4973.98	97.7962	10559.6	0.85352	0.449939	1	0.708654	0.635856	0.625648
Donor h	PRG2	55592.4	203	211.779	38148.7	13.0801	14193	107.496	2715.42	0.800298	0.542655	1	0.644528	0.571313	0.569115
Donor h	PRG3	17693	231	167.513	5847.71	21.2201	2645.72	8.664	8771.22	0.837002	0.291198	1	0.796755	0.45752	0.445662
Donor h	PRKCD	18530.2	53	58.2722	5736.86	10.1202	4154.52	9.7492	8507.66	0.954153	0.254936	1	0.707062	0.448379	0.446006
Donor h	PTPN11	36910.8	277	696.367	10368.8	49.48	8017.08	19.659	17482.5	0.746925	0.93698	1	0.552398	0.769067	0.758091
Donor h	PTPN6	5213.64	16	847.006	698.298	5.05	2417.95	11.4718	1217.86	0.928546	0.286866	1	0.458312	0.5292	0.527075
Donor h	PVR	50082.3	7792	11093.4	18111.1	274.973	10370.8	36.1653	2403.77	0.239801	0.87843	1	0.744764	0.666703	0.557663
Donor h	PYCARD	38516.4	3778	688.341	10852.5	297.293	12796.2	70.5921	10033.4	0.747374	0.073282	1	0.818707	0.490509	0.425286
Donor h	RAC1	17862.7	785	575.25	7364.87	228.301	2523.12	19.2607	6366.9	0.832817	0.41819	1	0.789516	0.540552	0.503578
Donor h	RAF1	47617	312	7549.76	16607.2	79.8001	18212.7	47.5329	4808.02	0.927099	0.681574	1	0.567848	0.677047	0.672107
Donor h	REG1A	48022.9	2333	1940.63	24675.3	34.3502	9799.37	58.1234	9182.17	0.830925	0.800433	1	0.759157	0.791148	0.743555
Donor h	REG1B	29045	9340	4246.78	7169.59	69.67	1308.2	31.4087	6879.33	0.909788	0.265958	1	0.762035	0.534384	0.30889
Donor h	REG3A	25269.1	5185	744.802	12245.1	141.411	1754.93	468.439	4729.46	0.851806	0.722674	1	0.564184	0.713085	0.528874
Donor h	REG3G	2053.65	444	98.1284	343.602	15.7513	42.8405	3.7471	1105.58	0.897001	0.505761	1	0.673925	0.612454	0.324491
Donor h	REG4	22799.7	214	354.723	15071.1	2.02	3961.01	21.4679	3175.35	0.949004	0.464535	1	0.779054	0.537708	0.531838
Donor h	REL	13219.4	432	150.115	2281.74	29.29	2143.3	6.2293	8176.71	0.925115	0.686657	1	0.807337	0.752599	0.688045
Donor h	RELA	16818.2	233	2060.3	7386.15	14.1804	4063.47	54.2512	3006.81	0.83546	0.384329	1	0.619784	0.524446	0.515564
Donor h	RELB	35957.5	2083	2807.12	8835.15	48.2119	12160.8	42.6036	9980.59	0.960058	0.151086	1	0.589937	0.471765	0.433873
Donor h	RHOA	26125.2	21	4032.99	5306.92	1.01	6708.66	23.7149	10030.9	0.987017	0.806052	1	0.763821	0.833885	0.832796
Donor h	RIPK1	32849	2553	2230.67	4532.17	54.5201	2630.72	44.0836	20803.8	0.915373	0.581537	1	0.653746	0.682876	0.537607
Donor h	RIPK2	21165.5	333	575.652	11412.9	17.15	5467.49	59.6289	3299.68	0.888605	0.356942	1	0.744072	0.496225	0.486945
Donor h	RNF216	42370	159	267.554	14037	37.4408	19486	33.7737	8349.27	0.777593	0.509172	1	0.685806	0.613585	0.610715
Donor h	RPE65-1	10070.6	1712	1034.73	4038.59	46.5004	1482.01	36.1634	1720.56	0.82404	0.793712	1	0.474841	0.728337	0.578356
Donor h	RPE65-2	23652.5	4447	2293.71	10415.2	61.2678	3671.68	90.1717	2673.45	0.861081	0.791666	1	0.479326	0.732376	0.576462
Donor h	RPE65-3	69411.7	5697	5099.54	39733.8	177.711	14683.4	119.21	3901.06	0.819485	0.815281	1	0.474837	0.732449	0.668637
Donor h	RPE65-4	1705.95	0	0	0	0	0	0	1705.95	0	0	0	0	0	0
Donor h	SDC1	16613.2	46	77.7864	4543.57	5.3832	2340.48	31.4864	9568.55	0.850856	0.830239	1	0.803447	0.8216	0.816212
Donor h	SDC2	84758.6	7748	3404.89	40445.3	591.851	17924.2	104.15	14540.2	0.820393	0.722318	1	0.660737	0.712609	0.633862
Donor h	SDC3	10021.1	487	565.025	5980.88	132.321	1248.19	8.3647	1599.31	0.570821	0.823128	1	0.649373	0.780734	0.735542
Donor h	SDC4	20456.6	2888	360.271	5682.59	277.71	2788.51	20.4519	8439.07	0.718492	0.353119	1	0.747852	0.508129	0.385809
Donor h	SELE	127335	8553	21320.4	62207.9	271.955	30624.3	200.075	4157.42	0.931077	0.735827	1	0.691733	0.761034	0.708104
Donor h	SELL	23648.2	2	7.3306	8448.12	2.01	5543.45	5.7965	9639.52	0.867596	0.967914	1	0.790449	0.897601	0.897473
Donor h	SELP	38936	4399	3542.73	19744.1	236.432	6496	57.5443	4460.24	0.891434	0.797536	1	0.650068	0.778301	0.678826
Donor h	SFTPA1	110946	41502	9214.52	44836.8	679.6	7556.45	240.222	6916.84	0.858405	0.665677	1	0.590414	0.688705	0.413314
Donor h	SFTPA2	69727.9	15591	5333.57	20740.6	1563.04	1837.94	468.082	24193.7	0.911419	0.121495	1	0.626565	0.342513	0.224018
Donor h	SFTPD	34255.6	2625	1155.19	19408.9	54.5401	3613.93	22.0656	7375.93	0.832859	0.711163	1	0.438769	0.676991	0.610823
Donor h	SIGLEC1	59621.6	8132	5800.35	21606.7	127.26	20289.3	70.591	3595.44	0.941602	0.868462	1	0.696011	0.80452	0.6876
Donor h	SIGLEC10	70608.8	16	63.106	21353.3	13.1401	15859.5	67.4096	33236.4	0.823403	0.75122	1	0.657308	0.711488	0.711183
Donor h	SIGLEC11	33436.6	25559	2780.31	516.477	377.312	56.6527	234.573	3912.27	0.896227	0.129114	1	0.434793	0.793518	0.101074
Donor h	SIGLEC12	8231.78	17	118.013	829.518	5.1005	685.427	4.7787	6571.95	0.966773	0.978003	1	0.440542	0.752368	0.74464
Donor h	SIGLEC14	27646.6	2207	3611.37	5396.63	342.584	2331.36	27.2085	13730.5	0.738103	0.868223	1	0.768161	0.811892	0.68288
Donor h	SIGLEC15	45483.8	9152	2704.87	13775.1	191.921	12784.2	49.5277	6826.12	0.95758	0.532905	1	0.834564	0.705868	0.538543
Donor h	SIGLEC5	12198.7	671	569.041	3225.03	53.52	1898.54	19.6134	5761.91	0.880692	0.75457	1	0.615153	0.723282	0.647653
Donor h	SIGLEC6	49925.2	2152	1636.7	23202.9	451.372	15350.4	3942.12	3189.66	0.759444	0.771411	1	0.408848	0.636526	0.604516
Donor h	SIGLEC7	12909.4	841	1283.59	2554.05	66.6204	5047.24	88.903	3028.01	0.387871	0.913028	1	0.681339	0.707735	0.646953
Donor h	SIGLEC8	24837.2	181	706.599	3836.15	11.11	4287.31	474.028	15341	0.373732	0.641208	1	0.587143	0.594064	0.582146
Donor h	SIGLEC9	35911.3	1155	601.066	10799	108.07	16600.2	38.348	6609.57	0.900026	0.921071	1	0.726438	0.805978	0.774167
Donor h	SIGLECL1	11907.8	820	207.45	3174.54	44.4703	2116.31	7.8502	5537.16	0.798762	0.832455	1	0.564335	0.730167	0.636067
Donor h	SIRPA	32580	2181	559.499	15403.5	77.8312	4997.66	95.2607	9265.21	0.766396	0.778978	1	0.558932	0.72719	0.658885
Donor h	SIRPB1	24638.8	1154	1436.57	10827.1	51.5504	3714	21.6995	7433.86	0.906497	0.817828	1	0.64529	0.786383	0.733571
Donor h	SOCS1	53525.1	6082	31354.4	4384.81	492.721	7005.46	32.1677	4173.53	0.970602	0.821829	1	0.68672	0.909854	0.797652
Donor h	SOCS3	9270.25	9	10.5496	2047.86	0	2164.94	2.8891	5035.02	1	0.339023	0	0.640052	0.494985	0.493933
Donor h	SRC	41360.5	1306	3272.89	13172.2	137.411	7448.27	5.3681	16018.3	0.927739	0.716594	1	0.785853	0.768438	0.728828
Donor h	SSC5D	71660.8	7348	33063	16285.8	168.64	6275.85	114.62	8404.78	0.964231	0.713111	1	0.586558	0.848556	0.749807
Donor h	STAT1	38153.3	521	1935.21	18478.2	154.49	12260.7	171.147	4632.53	0.928666	0.492968	1	0.569169	0.549497	0.540913
Donor h	STAT2	34636.2	1647	13315.5	9022.55	45.45	5484.93	59.0475	5061.67	0.983159	0.763881	1	0.797671	0.875687	0.826823
Donor h	SYK	22457.4	711	848.102	5984.31	71.7	8231.56	27.3659	6583.32	0.875028	0.413794	1	0.809513	0.657628	0.628122
Donor h	TAB1	48511.1	4242	8408.31	23196.1	156.601	7695.32	37.3933	4775.34	0.938282	0.305524	1	0.829654	0.545347	0.492407
Donor h	TAB2	38953.9	217	406.322	15665.2	184.931	12143.2	37.0214	10300.1	0.849209	0.737735	1	0.727865	0.736818	0.73123
Donor h	TAB3	31943.8	2056	3856.75	7116.85	196.991	4483.62	39.504	14194.1	0.908558	0.282737	1	0.415023	0.483836	0.427667
Donor h	TAS2R9-1	59816.9	9592	10199.9	30883.6	908.81	5428.38	67.5272	2736.64	0.928015	0.91624	1	0.728122	0.898843	0.747619
Donor h	TAS2R9-2	102813	20104	15308.1	55575.9	1626.17	7529.56	117.347	2551.66	0.951259	0.909499	1	0.758341	0.905105	0.723404
Donor h	TAS2R9-3	63468.8	4998	9731.64	38463.5	1224.82	6918.15	68.3812	2064.25	0.940107	0.920492	1	0.775303	0.90778	0.833809
Donor h	TAS2R9-4	53881.2	9154	4987.78	31651.8	763.5	4863.58	72.8794	2387.72	0.903782	0.900186	1	0.728686	0.882679	0.725543
Donor h	TBK1	3963.15	1	0	631.952	0	581.757	0	2748.44	0	0.660511	0	0.762423	0.709359	0.708775
Donor h	THBD	18982.2	389	12884.1	102.407	1079.79	311.546	102.017	4113.28	0.560219	0.667631	1	0.752812	0.598185	0.582427
Donor h	TICAM1	43416.6	6981	8709.82	18771.1	1127.42	5014.02	59.8522	2753.39	0.872405	0.238313	1	0.615373	0.484344	0.40107
Donor h	TICAM2	15459.9	150	98.3714	6687.96	4.04	4396.07	32.5457	4090.89	0.727635	0.849446	1	0.74882	0.808885	0.798182
Donor h	TIFA	42963.5	7388	9187.34	17598.1	355.693	5913.92	42.896	2477.51	0.968208	0.704928	1	0.700898	0.780558	0.637969
Donor h	TIRAP	25201.4	315	340.786	5547.69	20.2	6526.32	14.994	12436.4	0.896029	0.942621	1	0.416489	0.665305	0.648868
Donor h	TLR1	43766.3	5280	10989.1	15461	426.212	5827.1	57.7589	5725.1	0.293433	0.924526	1	0.708054	0.674877	0.581064
Donor h	TLR10	1335.38	103	266.536	365.454	17.1801	380.24	0	202.974	0.596522	0.909432	1	0.584322	0.709836	0.645272
Donor h	TLR2	46924.1	71	80.2162	24252.9	0	17019.2	30.5913	5470.13	0.891102	0.685888	0	0.526078	0.620514	0.61945
Donor h	TLR2 (from TLR4+TLR2 double)	26158.5	222	224.779	14539.8	18.1902	7659.29	16.1689	3478.28	0.860916	0.749247	1	0.550977	0.682901	0.676212
Donor h	TLR3	38749.4	343	3695.08	11842.7	61.6404	9953.74	13.5235	12839.7	0.95583	0.404246	1	0.500446	0.522917	0.515991
Donor h	TLR4	27397.8	54	26.7607	8990.61	1.01	10100.1	35.0215	8190.27	0.613138	0.199448	1	0.706226	0.467795	0.466478
Donor h	TLR4 (from TLR4+TLR2 double)	128140	9211	17582	57549.2	864.312	38788	537.169	3608.41	0.758353	0.565244	1	0.694998	0.641944	0.594257
Donor h	TLR5	5930.27	134	168.381	2632.44	7.07	2012.99	10.7264	964.662	0.684405	0.367939	1	0.637803	0.492603	0.479281
Donor h	TLR6	66692.8	18520	2041.19	33869.6	614.951	6084.34	63.3095	5499.39	0.742678	0.67775	1	0.743281	0.694868	0.484351
Donor h	TLR7	36441.4	5310	1480.24	19227.7	309.021	8027.56	53.3414	2033.48	0.802555	0.399252	1	0.490887	0.451525	0.381735
Donor h	TLR8	7359.66	50	500.699	1167.79	2.02	979.907	2.8913	4656.35	0.489319	0.230993	1	0.739985	0.468564	0.459888
Donor h	TLR9	12322	56	122.492	4146.69	4.04	1805.18	13.7863	6173.85	0.792543	0.672977	1	0.555138	0.640608	0.63476
Donor h	TMEM173	55902.9	12295	1879.62	25479.6	372.54	11484.6	32.8607	4358.66	0.825504	0.777524	1	0.552662	0.716086	0.545167
Donor h	TNF-1	41084.6	427	917.842	11447.2	134.19	10649.3	27.7858	17481.3	0.298643	0.218357	1	0.781022	0.484922	0.476139
Donor h	TNF-2	48573.1	1000	1439.85	16007.3	172.68	14764.2	18.8476	15170.2	0.30532	0.212214	1	0.793975	0.485784	0.471233
Donor h	TNF-3	45156	247	2038.48	14126.7	96.0814	13575.9	28.2366	15043.5	0.252663	0.233395	1	0.790551	0.490686	0.486657
Donor h	TNF-4	12371.3	57	713.091	3388.99	25.24	3697.53	5.1318	4484.31	0.254187	0.238377	1	0.789769	0.502828	0.499191
Donor h	TNFAIP3	30330.2	17	8437.51	7492.41	26.1516	10820.8	74.379	3462.01	0.870202	0.468248	1	0.540959	0.624808	0.624412
Donor h	TRAF3	117459	10270	18854.3	70109	2733.99	11546.8	381.194	3563.29	0.799283	0.710947	1	0.724742	0.736276	0.669663
Donor h	TRAF6	13357.4	155	263.563	5495.63	65.2664	2869	5.2883	4503.64	0.715692	0.790367	1	0.661629	0.747191	0.734102
Donor h	TREM1	64926.1	6564	5767.95	28656.6	324.994	21166.4	67.006	2379.12	0.568455	0.934777	1	0.649182	0.78926	0.706342
Donor h	TREM2	40175.5	1567	461.355	18131.1	104.04	14222.6	51.7477	5637.59	0.841268	0.922515	1	0.326196	0.663983	0.633812
Donor h	TRHR-1	61744.1	24343	7300.81	18219.4	3265.96	1794.66	109.47	6710.77	0.890673	0.372421	1	0.498988	0.570599	0.317702
Donor h	TRHR-2	57610.9	20567	7581.93	20103.8	2556.98	1854.38	45.0639	4901.75	0.892727	0.393507	1	0.527854	0.567509	0.345879
Donor h	TRHR-3	67754.2	32806	8834.53	18760.3	3314.22	1908.39	62.5055	2068.21	0.875514	0.367188	1	0.532453	0.577548	0.288825
Donor h	TRHR-4	167730	69338	20623.9	60634.7	7295.79	7386.29	79.9265	2371.81	0.889236	0.399714	1	0.555005	0.562548	0.326547
Donor h	TRIM47	49958	4122	2418.41	16190.5	198.031	15287.7	15.2449	11726	0.955391	0.833065	1	0.778172	0.818098	0.729859
Donor h	TYROBP	5263.79	18	133.992	752.248	7.07	1261.76	87.7366	3002.99	0.903803	0.893571	1	0.422258	0.61861	0.613486
Donor h	U2AF2-1	34392.5	2760	3691.17	8790.93	117.15	4717.17	8.0486	14308	0.959514	0.831047	1	0.71131	0.826957	0.713271
Donor h	U2AF2-2	38986.9	2202	5573.56	14965.5	111.09	10141	52.6359	5941.19	0.959686	0.85727	1	0.747216	0.840077	0.784009
Donor h	U2AF2-3	53515.2	2560	5014.79	20427.2	157.52	11310.8	126.345	13918.6	0.933572	0.78226	1	0.780842	0.803313	0.751211
Donor h	U2AF2-4	51238.6	2463	5672.36	17185.6	78.8406	9344.89	48.7856	16445.1	0.942944	0.816876	1	0.764323	0.824262	0.765831
Donor h	UBE2N	13810.5	537	3920.93	20.9498	33.32	438.494	13.2317	8846.62	0.215831	0.612674	1	0.638002	0.265576	0.236769
Donor h	UNC93B1	63922.6	234	409.645	29427.1	51.51	26641.2	111.453	7047.78	0.756938	0.543336	1	0.602114	0.573001	0.570639
Donor h	VAV1	15669.2	35	1295.53	6437.41	8.0601	2143.18	8.0137	5741.96	0.698015	0.401622	1	0.618211	0.487921	0.4862
Donor h	VCAN	44497.3	2601	2367.51	18842.4	320.364	7074.28	39.3684	13252.4	0.833704	0.572455	1	0.655471	0.619397	0.56777
Donor h	VSIR	40544.8	2362	5651.57	13108.8	56.5401	13234.9	51.2152	6079.72	0.95001	0.932066	1	0.531657	0.770012	0.717162
Donor h	ZFP36	2378.75	1	2.5802	1114.68	0	900.363	1.0832	359.039	0	0.804428	0	0.848982	0.823281	0.822873
Donor i	ACAN	39355.8	3249	2712.33	21452.7	269.66	7845.01	35.0224	3792.11	0.775842	0.730706	1	0.768874	0.746025	0.677803
Donor i	AIM2	25809.4	70	1849.6	11721.2	9.08	9577.59	50.3406	2531.65	0.881885	0.302775	1	0.5041	0.432568	0.431264
Donor i	AKT1	32686.3	497	17020.2	6821.08	422.223	5245.94	27.4908	2652.38	0.971765	0.830414	1	0.666742	0.885271	0.870609
Donor i	ALCAM	8703.14	63	3325.29	3225.81	191.052	900.873	2.556	994.565	0.724169	0.881319	1	0.622115	0.785362	0.778941
Donor i	ALPK1	5457.77	520	366.795	1906.78	63.61	546.021	3	2051.56	0.873761	0.838605	1	0.815544	0.842271	0.713574
Donor i	ARHGEF2	23346.4	257	1288.74	4231.39	5.05	15158.5	43.495	2362.27	0.956159	0.918565	1	0.773121	0.814336	0.804342
Donor i	ASGR1	18749.9	31	3327.54	5023.05	25.25	8237.93	3.0536	2102.04	0.987362	0.71746	1	0.460094	0.644332	0.643132
Donor i	ASGR2	18139.8	1528	976.555	8127.52	57.5603	5413.37	5.842	2030.96	0.847823	0.877948	1	0.711586	0.814622	0.737323
Donor i	ATRN	24556.3	0	34.9225	10190	0	8445.66	924.939	4960.78	0	0.593487	0	0.842973	0.705232	0.705232
Donor i	ATRNL1	13409.8	104	5188.06	1738.06	3.0502	3675.87	23.4705	2677.25	0.0987447	0.122852	1	0.82465	0.354565	0.351121
Donor i	BCAN	12632.6	1692	1261.92	7404.47	221.17	320.046	0	1732.94	0.84723	0.954412	1	0.642147	0.929964	0.785601
Donor i	BCL10	17567.3	204	5671.05	6212.01	33.3201	3167.05	0	2279.86	0.339072	0.323214	1	0.766657	0.423781	0.418126
Donor i	BCL3	34834.6	12427	10173.5	5377.11	966.055	1395	35.9764	4459.93	0.844136	0.641368	1	0.620178	0.774229	0.457098
Donor i	BIRC2	11212.7	92	565.129	4007.04	25.25	4055.93	48.5216	2418.8	0.956048	0.911404	1	0.712978	0.821573	0.812931
Donor i	BIRC3	26923.9	290	3179.3	12755.4	22.22	8523.42	51.0016	2102.57	0.934091	0.314029	1	0.736473	0.542264	0.535915
Donor i	BLNK	36962.9	4976	955.953	23475.8	139.733	4474.32	63.2467	2877.78	0.853953	0.767019	1	0.659908	0.754501	0.644149
Donor i	BTK	9607.24	836	615.043	6028.3	70.1142	1087.57	0	970.218	0.885236	0.715773	1	0.546068	0.708029	0.639497
Donor i	CALCOCO2	40229.5	159	28690.4	479.739	173.71	8045.23	24.0936	2657.36	0.899063	0.72616	1	0.717192	0.858179	0.854545
Donor i	CALM1	23528.2	125	199.606	13175.8	115.16	7859.61	55.2973	1997.72	0.658181	0.805607	1	0.69146	0.763256	0.758814
Donor i	CARD9	20958.4	1369	1604.04	13060.3	281.921	2869.13	16.0772	1757.97	0.776662	0.94345	1	0.808136	0.907536	0.842774
Donor i	CASP1	14643.6	1116	5923.23	2674.81	91.9606	2487.84	7.3434	2342.38	0.957997	0.804555	1	0.701104	0.864448	0.785976
Donor i	CASP2	52076.5	277	4457.17	18018.6	24.24	26628.5	203.224	2467.86	0.128738	0.65216	1	0.787235	0.678057	0.674256
Donor i	CASP8	26808.9	235	7400.38	3419.37	11.1302	12130.1	39.3683	3573.64	0.987996	0.738365	1	0.810337	0.856971	0.848289
Donor i	CBLB	40454.3	1489	1596.03	28141.7	97.9701	6153.7	41.0946	2934.76	0.785048	0.676556	1	0.618624	0.672342	0.64563
Donor i	CD14	23558.2	0	134.954	15736.4	1.01	5796.51	151.881	1737.47	0.601238	0.90318	1	0.713473	0.850556	0.850556
Donor i	CD180	32278.1	450	5202.9	7455.29	53.53	16347.5	146.807	2622.14	0.901634	0.291119	1	0.500425	0.519481	0.511559
Donor i	CD1C	22783.6	303	90.1567	10677.5	4.04	8911.87	43.9611	2753.16	0.831639	0.928623	1	0.686997	0.818795	0.806382
Donor i	CD1D	32229.6	296	745.239	8229.92	5.0601	19598.1	162.565	3192.72	0.114721	0.916142	1	0.732422	0.769269	0.761383
Donor i	CD207	28693	3051	3537.31	12801.2	40.4506	6365.35	27.3944	2870.28	0.903486	0.682447	1	0.648137	0.707787	0.624072
Donor i	CD209	34465.4	263	801.281	20119.4	31.2406	9944.13	141.785	3164.55	0.239676	0.0782823	1	0.846304	0.330594	0.327803
Donor i	CD22	8851.33	16	11.2974	4448.13	3.0401	3540.2	8.6123	824.059	0.756705	0.911354	1	0.531139	0.74297	0.741488
Donor i	CD248	25044.7	8516	3438.7	7919.02	2203.6	1301.45	14.3843	1651.51	0.615771	0.590444	1	0.743203	0.670402	0.4262
Donor i	CD274	41647.7	543	13224.6	15679.1	34.3603	9897.15	17.9001	2251.59	0.959574	0.355876	1	0.637391	0.633769	0.625029
Donor i	CD276	25097.3	204	552.184	15738.2	11.11	4205.7	81.5945	4304.5	0.776157	0.898093	1	0.567531	0.827072	0.818926
Donor i	CD300A	31644.8	303	399.369	16845.4	45.45	10912.5	6.3679	3132.76	0.761866	0.281393	1	0.719604	0.458913	0.454035
Donor i	CD300C	19735.9	63	1784.77	4427.34	2.02	9607.53	8.6433	3842.59	0.699435	0.832261	1	0.675953	0.722383	0.719518
Donor i	CD300E	27790	1325	1710.98	18092	341.532	4230.47	46.4482	2043.57	0.793534	0.820751	1	0.625431	0.787453	0.746855
Donor i	CD300LB	10004.9	24	1400.04	2809.73	6.0903	4107.98	20.5647	1636.54	0.420272	0.763158	1	0.690072	0.669589	0.667664
Donor i	CD300LF	35114.8	848	28335.3	91.3838	211.11	3016.32	29.5248	2583.15	0.467205	0.840134	1	0.688611	0.492933	0.480072
Donor i	CD302	10415.7	1698	913.595	5188.08	257.53	752.349	18.704	1587.41	0.722504	0.912221	1	0.577577	0.855625	0.690707
Donor i	CD33	10702.5	62	1178.58	1782.38	0	5969.78	5.0458	1704.72	0.661852	0.934306	0	0.539784	0.634631	0.630256
Donor i	CD48	10465.4	6	3.8537	5019.32	0	4013.39	40.1435	1382.72	0.496276	0.182684	0	0.752935	0.436082	0.435793
Donor i	CD69	29243.5	793	283.122	15084.6	15.15	10847.4	14.5873	2205.7	0.738561	0.896161	1	0.775284	0.844532	0.819749
Donor i	CD72	10763.8	20	354.728	4147.14	4.04	5005.15	7.9854	1224.76	0.995351	0.681803	1	0.80454	0.758222	0.756631
Donor i	CD83	12092	224	1940.3	4380.48	56.56	4212.61	31.7122	1246.34	0.888003	0.623953	1	0.68771	0.699703	0.68521
Donor i	CD93	807.829	0	62.5187	21.9357	0	163.798	0.1177	559.46	1	0.724636	0	0.119216	0.394524	0.394524
Donor i	CDC42	60327.7	37348	10338.2	8085.84	672.196	333.694	8.9437	3540.89	0.802163	0.519402	1	0.588738	0.68767	0.235327
Donor i	CEBPB	341.564	0	0	0	0	11.3621	0	330.202	0	0	0	1	1	1
Donor i	CHID1	26841.3	953	3092.71	13690.6	62.6301	6436.61	136.197	2469.52	0.794537	0.909429	1	0.514607	0.78526	0.754382
Donor i	CHODL	40103.1	9667	6328.37	12183	281.82	7885.61	81.5534	3675.71	0.816368	0.934364	1	0.711845	0.841297	0.617535
Donor i	CHUK	14370.5	2	2067.96	6133.31	0	4296.53	30.1918	1840.54	0.148201	0.942115	0	0.786794	0.757353	0.757232
Donor i	CLC	35564.3	13847	2276.94	12742.3	513.051	2509.12	21.6769	3654.26	0.666336	0.562876	1	0.72261	0.61058	0.345445
Donor i	CLEC10A	44097.3	576	1022	20348	2.02	17925.7	178.204	4045.39	0.945595	0.630451	1	0.551008	0.602428	0.593725
Donor i	CLEC11A	8284.05	3480	942.418	2703.52	14.14	314.399	6.2803	823.297	0.702684	0.838196	1	0.706595	0.796229	0.424523
Donor i	CLEC12A	39465.8	750	4645.15	20967.1	86.84	9626.6	0.241	3389.92	0.324562	0.856179	1	0.681513	0.739029	0.723665
Donor i	CLEC12B	36740.1	1441	4769.79	20634.7	94.911	6540.85	50.9467	3207.86	0.845267	0.458125	1	0.737387	0.574373	0.549653
Donor i	CLEC14A	35439	7813	4274.69	15160.3	619.636	5335.44	297.217	1938.74	0.823517	0.476242	1	0.75806	0.606712	0.463947
Donor i	CLEC16A	32892.4	1192	11148.7	11131.9	61.8524	6633.24	168.675	2556.02	0.986737	0.664736	1	0.697869	0.79693	0.765441
Donor i	CLEC17A	31620	1989	443.051	18642.3	85.85	7950.07	129.961	2379.84	0.844055	0.816857	1	0.69643	0.78258	0.729109
Donor i	CLEC18A	41357.3	36611	2873.27	0	381.093	0	33.134	1458.84	0.795867	0	1	0	0.819771	0.0669211
Donor i	CLEC18B	61543.1	52501	6883.4	0	305.02	0	0	1853.65	0.748708	0	1	0	0.759371	0.0914513
Donor i	CLEC18C	42453.5	34981	5698.25	16.6908	324.17	0	3	1430.39	0.790162	1	1	0	0.802006	0.118074
Donor i	CLEC19A	10367	149	1694.36	3149.87	30.29	3449.46	3.6932	1890.33	0.180858	0.69777	1	0.858008	0.660054	0.648447
Donor i	CLEC1A	33081.4	1136	15596.8	8593.45	199.96	4343.38	1.0246	3210.82	0.984266	0.772167	1	0.723642	0.881546	0.848019
Donor i	CLEC1B	26482	108	60.5596	16139.7	5.05	8312.56	92.3756	1763.83	0.974372	0.615676	1	0.819181	0.685638	0.682631
Donor i	CLEC20A	17590.4	398	258.326	11029.7	61.6	4432.24	33.713	1376.79	0.882834	0.599312	1	0.782772	0.65704	0.640878
Donor i	CLEC2A	30171	111	292.334	22762.9	2.02	5406.35	78.7854	1517.61	0.929345	0.767172	1	0.671531	0.750688	0.747772
Donor i	CLEC2B	25475.6	64	26.4809	15186.3	9.1203	7713.98	60.6669	2414.98	0.933903	0.599983	1	0.616024	0.605923	0.604237
Donor i	CLEC2D	6012.85	6	8.9786	3188.18	0	985.007	5.7345	1818.96	0.602622	0.80266	0	0.566222	0.746543	0.745474
Donor i	CLEC2L	30996.2	684	1478.01	19668.8	17.3013	7003.07	94.6843	2050.32	0.880843	0.555855	1	0.633345	0.592447	0.578401
Donor i	CLEC3A	51772.4	8286	11484	25031.1	164.59	3593.52	47.778	3165.29	0.920137	0.68514	1	0.723075	0.756821	0.62768
Donor i	CLEC3B	31181.4	144	9304.81	6701.35	4.03	11006.3	150.56	3870.42	0.774128	0.953612	1	0.44694	0.685389	0.681755
Donor i	CLEC4A	28947.9	1941	2151.05	17255	156.53	5993.12	22.1423	1429.07	0.88159	0.790309	1	0.78521	0.798081	0.741744
Donor i	CLEC4C	38167.9	118	27.6203	14851.4	0	19904.2	45.0782	3221.58	0.861508	0.497931	0	0.618992	0.567495	0.565576
Donor i	CLEC4D	32012.5	400	127.136	17810.9	138.37	10796.8	148.87	2590.42	0.653923	0.15861	1	0.716946	0.373607	0.368502
Donor i	CLEC4E	41982.7	938	3245.47	22338.1	41.38	13525.8	23.8987	1870.1	0.540166	0.898611	1	0.592616	0.763289	0.745429
Donor i	CLEC4F	30821.6	405	8682.15	9732.44	3.0401	10018	18.5691	1962.45	0.99183	0.358955	1	0.643311	0.652436	0.643275
Donor i	CLEC4G	2.536	0	0	0.9591	0	1.5769	0	0	0	1	0	0.64037	0.77638	0.77638
Donor i	CLEC4M	32003.5	337	4176.76	9297.49	129.26	15230.3	1.5326	2831.18	0.0611561	0.0782502	1	0.774017	0.447416	0.442247
Donor i	CLEC5A	42579.4	8358	3715.33	19567	500.849	5755.62	97.016	4585.59	0.819759	0.565511	1	0.703389	0.631722	0.492398
Donor i	CLEC6A	13317.3	30	27.4291	5489.52	1.01	6300.8	29.3616	1439.21	1	0.161703	1	0.758876	0.482084	0.480864
Donor i	CLEC7A	33226.6	170	98.6767	13426.8	5.05	16605.3	113.477	2807.35	0.980618	0.759579	1	0.477832	0.605096	0.601702
Donor i	CLEC9A	45536	2844	3894.98	28071	503.96	7569.49	98.8811	2553.62	0.897619	0.393027	1	0.636424	0.495767	0.462888
Donor i	CLECL1	34481.8	44	210.856	12088.2	56.5701	17427.7	208.337	4446.06	0.905367	0.86204	1	0.761099	0.803543	0.802358
Donor i	COLEC10	3962.96	108	391.956	1903.51	8.08	904.117	3.0281	644.275	0.219871	0.848013	1	0.810303	0.761012	0.736224
Donor i	COLEC11	26583.7	9414	9749.84	4217.22	209.141	915.848	9.7259	2067.88	0.11539	0.0761713	1	0.906977	0.164727	0.101447
Donor i	COLEC12	28278.3	1816	19845.1	2706.85	491.861	1709.49	11.8619	1697.2	0.985429	0.792685	1	0.726853	0.946784	0.882072
Donor i	CREB1	53386.4	333	10438.1	25639.2	1.0201	13476.6	12.0372	3486.44	0.991233	0.618947	1	0.661727	0.709006	0.704273
Donor i	CRX-1	42111.3	1592	5187.66	23911.6	204.03	5386.15	206.425	5623.38	0.878222	0.407565	1	0.662266	0.520981	0.498121
Donor i	CRX-2	41236.5	1727	6779.05	23764.7	103.02	5874.42	265.504	2722.75	0.893146	0.423344	1	0.721728	0.56017	0.534877
Donor i	CRX-3	44752.6	1638	8389.27	24769.1	337.281	5905.26	208.065	3505.66	0.943689	0.413521	1	0.660302	0.568412	0.545725
Donor i	CRX-4	40719.1	3151	6258.02	22099.1	550.35	5228.15	181.013	3251.39	0.885981	0.360716	1	0.615351	0.506318	0.463531
Donor i	DDX3X	18615.6	131	209.047	8059.16	16.16	8912.06	31.7436	1256.46	0.731825	0.165084	1	0.898314	0.552755	0.548576
Donor i	DDX58	44807.6	825	10018.4	12637	195.93	18130.3	52.3334	2948.56	0.0862373	0.461465	1	0.762535	0.505505	0.495529
Donor i	DGCR2	23844.4	399	5527.63	12768.4	14.14	3002.02	26.0088	2107.23	0.963072	0.661781	1	0.679963	0.74271	0.729061
Donor i	DHX58	16463.4	302	2575.39	5591.88	75.9119	5115.53	43.0647	2759.66	0.618768	0.869111	1	0.633834	0.731496	0.715325
Donor i	ECSIT	42297.7	1338	18342.7	15679.2	126.644	4930.43	52.731	1827.94	0.973875	0.534997	1	0.669866	0.759519	0.734375
Donor i	F13B-1	37516.8	6553	8741.62	12035.1	152.641	7952.24	86.9416	1995.32	0.681381	0.872394	1	0.659765	0.756709	0.616769
Donor i	F13B-2	46682.6	8095	11565.5	13580.5	304.951	9906.76	259.698	2970.21	0.617572	0.896498	1	0.567737	0.71404	0.581018
Donor i	F13B-3	46618.1	15299	11690.6	10677.4	280.851	5643.88	94.7774	2931.58	0.60184	0.888847	1	0.680382	0.729774	0.473652
Donor i	F13B-4	39328.2	6389	11449.1	10612.2	358.854	8093.67	324.633	2100.74	0.60697	0.89339	1	0.657358	0.724569	0.599124
Donor i	FADD	30004.4	690	2448	13004.3	204	10745.1	50.5146	2862.53	0.915011	0.443275	1	0.59753	0.554098	0.539985
Donor i	FCER1A	27504.7	579	794.414	17442.1	54.54	6745.63	66.5911	1822.42	0.867508	0.757232	1	0.750809	0.75953	0.742362
Donor i	FCER1G	28318.3	52	145.986	8273.35	13.13	17568.9	159.206	2105.71	0.149226	0.935485	1	0.467349	0.614788	0.61356
Donor i	FCER2	26831.6	134	23.6734	8787.59	14.13	15477	36.9059	2358.35	0.959	0.963175	1	0.432498	0.62523	0.621802
Donor i	FCGR1A	65996.8	6474	13390.8	0	5187.3	0	13.2087	40931.5	0.91706	0	1	0	0.940218	0.697245
Donor i	FCN1	31560.9	1492	5519.9	12024.8	1262.53	7222.07	176.337	3863.17	0.70955	0.882801	1	0.683874	0.796551	0.753368
Donor i	FCN2	37765.1	8647	8915.64	14760.1	137.36	3193.59	5.6048	2105.78	0.804055	0.355984	1	0.747848	0.553519	0.419275
Donor i	FCN3	30491.8	300	7055.86	10797.6	0	10370.8	102.917	1864.52	0.937237	0.865695	0	0.747688	0.840219	0.831382
Donor i	FREM1	22132.7	5401	1764.4	11033.5	126.392	2052.9	9.7062	1744.79	0.809738	0.694895	1	0.719573	0.714381	0.525043
Donor i	HAVCR2	43295.2	14	1465.3	12821	1.0201	26618.9	96.6866	2278.37	0.183396	0.95045	1	0.748247	0.791395	0.791124
Donor i	HMGB1	51175.1	180	45682.4	0	2132.57	0	63.4134	3116.67	0.835553	0	1	0	0.842887	0.839726
Donor i	IFIH1	64402.1	462	33826.3	11833.5	22.22	15082.3	53.5824	3122.25	0.204746	0.955277	1	0.752376	0.487126	0.48345
Donor i	IGSF6	32420.2	130	10.3032	16158.6	2.02	12337.6	148.031	3633.71	0.737402	0.344405	1	0.613645	0.461112	0.459019
Donor i	IKBKG	22490.7	423	31.363	8568.62	3.03	10916.8	184.389	2363.5	0.692351	0.250732	1	0.821251	0.570631	0.558527
Donor i	IL10	28272.5	505	1400.22	15291.8	303.93	7739.15	77.4642	2954.98	0.93577	0.800573	1	0.641334	0.760854	0.745631
Donor i	IL1B	20101.2	517	6095.5	7374.3	362.58	4263.92	0	1487.9	0.960843	0.284683	1	0.816826	0.652156	0.634042
Donor i	IL1RL1	16888.2	1475	4244.22	4841.02	165.65	4445.27	22.9803	1694.03	0.817243	0.819691	1	0.638716	0.762375	0.688254
Donor i	IRAK1	692.011	0	0	46.4574	0	94.8656	0	550.688	0	0.709512	0	0.778511	0.755829	0.755829
Donor i	IRAK3	625.882	0	0	1.5163	0	0.1718	1.1456	623.048	0	0.691486	0	1	0.722884	0.722884
Donor i	IRAK4	15542.2	604	358.952	9434.41	99.9901	3167.6	23.3882	1853.86	0.764284	0.664372	1	0.658022	0.668147	0.638615
Donor i	IRF1	0.4166	0	0	0	0	0	0	0.4166	0	0	0	0	0	0
Donor i	IRF3	36786.9	4357	3376.53	20946.6	411.01	5194.49	8.0201	2493.24	0.884591	0.605932	1	0.741537	0.666318	0.581642
Donor i	IRF7	17864.1	54	2512.44	7068.53	6.0802	5740.81	31.6539	2450.62	0.865082	0.552409	1	0.572131	0.611224	0.609079
Donor i	JUN	9.95319e+06	108	8682.4	7870.75	55.5601	14757.2	9.91925e+06	2464.96	0.15538	0.807339	1	0.792628	0.62029	0.618162
Donor i	KCNV1-1	9226.15	1297	240.838	4172.54	12.12	2343.49	10.0289	1150.13	0.846401	0.649288	1	0.730281	0.68497	0.574828
Donor i	KCNV1-2	9581.74	1598	383.472	4300.37	26.26	2142.42	3.4282	1127.79	0.706816	0.686535	1	0.74812	0.708126	0.574219
Donor i	KCNV1-3	8223.41	1781	394.099	3291.6	36.36	1490.33	0	1230.02	0.761584	0.699879	1	0.771835	0.727212	0.542013
Donor i	KCNV1-4	11291.4	948	324.555	5452.56	8.1305	3133.2	0	1424.96	0.846034	0.699845	1	0.752511	0.723941	0.654382
Donor i	KLRB1	17121.9	26	129.507	8027.71	32.9594	7242.78	33.9516	1628.96	0.664586	0.803278	1	0.445606	0.634677	0.63361
Donor i	KLRC1	13958.5	69	319.016	5894.66	5.05	5885.41	46.026	1739.35	0.940528	0.724395	1	0.740591	0.738082	0.733898
Donor i	KLRC2	36988.1	24422	6696.56	0	374.225	0	15.825	5479.48	0.910041	0	1	0	0.914802	0.205392
Donor i	KLRC3	46556.7	12786	10588.8	7283.13	2899.51	2887.57	31.0202	10080.7	0.909396	0.784786	1	0.526446	0.835401	0.542318
Donor i	KLRC4	29357.9	798	5162.61	16503.9	256.55	4180.58	22.09	2434.22	0.722649	0.740484	1	0.630933	0.721962	0.700546
Donor i	KLRD1	47558.9	2527	17659.8	12490.5	347.4	10987.4	127.804	3419.01	0.986581	0.973906	1	0.289056	0.798137	0.752311
Donor i	KLRF1	30453.8	1007	1262.47	18442.3	248.43	7549.44	12.8652	1931.27	0.728179	0.77373	1	0.56235	0.715659	0.690381
Donor i	KLRF2	13603.2	4429	1357.03	3551.56	284.032	1739.99	0	2241.56	0.82529	0.861348	1	0.695566	0.818361	0.499346
Donor i	KLRG1	22675.1	425	1018.75	11979.7	21.2201	6523.89	24.227	2682.33	0.986941	0.884184	1	0.573507	0.785958	0.76923
Donor i	KLRG2	36118.1	6392	2982.38	16308.6	88.8902	6713.98	143.355	3488.82	0.793203	0.850346	1	0.773481	0.824548	0.662308
Donor i	KLRK1	30532.1	380	210.616	18611.4	7.07	8097.97	195.018	3029.97	0.839024	0.313764	1	0.639802	0.416104	0.410314
Donor i	KSR1	28914.1	566	4744.22	16419.4	97.96	5548.51	33.5426	1504.43	0.343782	0.812777	1	0.844576	0.73705	0.721812
Donor i	LALBA-1	29764	1029	3131.02	13691.3	473.863	8808.35	49.2645	2581.22	0.475841	0.868398	1	0.703816	0.768169	0.739037
Donor i	LALBA-2	31864.4	1059	4612.28	13200.6	336.28	8602.58	4.1774	4049.45	0.309609	0.889827	1	0.673642	0.721657	0.694177
Donor i	LALBA-3	26549	1367	3234.74	11371	333.31	7562.8	8.0914	2672.04	0.434454	0.869989	1	0.659808	0.738664	0.69636
Donor i	LALBA-4	24611.3	500	2308.28	12094.8	228.513	7487.58	30.7251	1961.45	0.40703	0.871076	1	0.701096	0.766442	0.749499
Donor i	LAYN	38333	2845	6510.1	20181.9	451.441	6323.47	12.8572	2008.21	0.908524	0.869748	1	0.751746	0.856752	0.789626
Donor i	LBP	37815.5	6795	25437.8	393.177	478.68	1640.54	115.1	2955.19	0.157315	0.287869	1	0.743009	0.207961	0.167291
Donor i	LCP2	2555.81	10	497.188	534.744	1.01	514.139	0.3809	998.352	0.81256	0.589011	1	0.574749	0.656382	0.652166
Donor i	LGALS1	33554.3	254	2058.5	18888.9	7.07	9202.6	83.7053	3059.58	0.926888	0.831459	1	0.629678	0.776437	0.769952
Donor i	LGALS12	25558.8	630	4149.05	8737.25	236.29	8733.53	62.4969	3010.17	0.94746	0.467275	1	0.303584	0.498781	0.484806
Donor i	LGALS13	23300.4	2370	8152.05	7176.73	73.7301	3147.31	27.867	2352.71	0.954498	0.739259	1	0.680998	0.825001	0.731537
Donor i	LGALS14	29302	5059	2590.98	17101.8	212.231	2268.58	16.6416	2052.77	0.840969	0.877481	1	0.601562	0.846158	0.688967
Donor i	LGALS16	39289.2	2139	1698.91	28785.1	237.35	3193.26	11.3512	3224.19	0.377299	0.642281	1	0.677448	0.634822	0.597159
Donor i	LGALS2	21404.4	3462	1609.57	12465.8	313.303	1522.92	0.1327	2030.68	0.838174	0.725169	1	0.654703	0.735268	0.603878
Donor i	LGALS3	22152.4	418	1369.23	7510.79	160.085	9815	343.817	2535.52	0.94192	0.419539	1	0.589483	0.550866	0.538919
Donor i	LGALS4	29038.3	8558	16551.9	1008.29	592.003	388.271	15.7127	1924.19	0.939455	0.485169	1	0.788896	0.913529	0.625026
Donor i	LGALS7	79862.3	72833	188.278	0	0	0	8.7411	6832.27	1	0	0	0	1	0.0025784
Donor i	LGALS7B	76868	44319	16987.4	0	2104.62	0	545.479	12911.4	0.772079	0	1	0	0.797204	0.240025
Donor i	LGALS8	23774.6	1133	5495.73	10917.9	1.01	4233.73	149.169	1844.02	0.922367	0.27999	1	0.761251	0.549676	0.521084
Donor i	LGALS9	36882.3	760	7089.77	14079.4	166.63	11004	61.9414	3720.55	0.371899	0.875998	1	0.659146	0.692338	0.676441
Donor i	LGALS9B	76679	41219	25010.6	0	6164.49	0	458.538	3826.4	0.920966	0	1	0	0.936594	0.403326
Donor i	LGALS9C	111606	21474	80042	22.6518	5538.8	0	161.191	4367.18	0.95933	1	1	0	0.961972	0.769052
Donor i	LMAN1	5020.38	1	2.9222	1352.98	0	2384.11	0	1279.38	0.67764	0.57113	0	0.508444	0.531254	0.531112
Donor i	LMAN1L	23831.4	272	156.801	16803.7	20.1701	3873.67	78.1611	2626.86	0.713502	0.874052	1	0.744984	0.848992	0.838061
Donor i	LMAN2	20450.5	21	1323.25	8311.75	0	7198.56	12.5012	3583.45	0.496574	0.844453	0	0.740226	0.772536	0.771574
Donor i	LMAN2L	20135.9	151	567.147	13345.8	25.2803	4602.08	34.2111	1410.44	0.891483	0.700125	1	0.683444	0.702247	0.696574
Donor i	LSP1	12359.3	98	973.803	6441.94	34.4583	3354.9	4.4559	1451.78	0.846964	0.967652	1	0.464163	0.800549	0.793353
Donor i	LY75	22380.2	224	96.6922	13257.5	36.3601	6180.91	53.8902	2530.81	0.897413	0.785829	1	0.582515	0.722569	0.714393
Donor i	LY86	27193.3	91	328.055	12602.2	18.17	11908.6	262.871	1982.44	0.972858	0.667801	1	0.735756	0.704626	0.702056
Donor i	LY9	48409.7	658	11698.6	14148.7	141.41	18423.1	307.701	3032.18	0.273341	0.931104	1	0.720194	0.67057	0.66078
Donor i	LY96	21533.2	109	235.943	3502.19	10.1	14584.7	65.5685	3025.71	0.927177	0.723078	1	0.620603	0.644334	0.640525
Donor i	MAG	11274.4	39	1557.21	3497.41	8.08	5046.97	9.2024	1116.57	0.13368	0.850122	1	0.847468	0.738562	0.735724
Donor i	MALT1	15413	124	3128.93	4552.25	1.01	6150.52	12.4885	1443.84	0.0679718	0.252738	1	0.774282	0.442896	0.438961
Donor i	MAP3K1	8893.15	0	65.5483	5039.55	0	256.3	50.0156	3481.73	0.770908	0.516033	0	0.672978	0.526652	0.526652
Donor i	MAP3K14	4834.9	24	35.207	2058.53	0	1330.95	0	1386.21	1	0.571	0	0.694691	0.623481	0.619142
Donor i	MAP3K7	32718.2	531	1744.39	22501.7	179.417	6026.49	29.8192	1705.38	0.816021	0.96694	1	0.769	0.919317	0.903561
Donor i	MAP3K8	33271.2	69	65.5342	15791.2	0	15386.5	79.1715	1879.76	0.970815	0.264161	0	0.359477	0.312584	0.311895
Donor i	MAPK14	21878.2	1	14725.2	1170.77	47.45	3011.36	54.2662	2868.14	0.949672	0.850559	1	0.639675	0.894427	0.894379
Donor i	MARCO	22600.3	651	2979.1	6855.78	29.5526	9450.33	89.8984	2544.68	0.929509	0.701105	1	0.700993	0.736737	0.712715
Donor i	MAVS	29296.7	1182	3163.59	19252.1	79.76	3598.79	17.7153	2002.84	0.910003	0.918267	1	0.678641	0.884467	0.846139
Donor i	MB21D1	28574	121	556.552	9366.65	26.3913	15607.1	87.8433	2808.44	0.861456	0.760234	1	0.442204	0.568469	0.565791
Donor i	MBL2	24763.1	319	924.917	13986.5	1.01	7586.06	18.9524	1926.69	0.779609	0.63133	1	0.768578	0.683719	0.674161
Donor i	MPZL1	17991.3	73	7445.88	5299.99	75.6906	3028.24	35.5891	2032.89	0.110197	0.980899	1	0.894331	0.555414	0.552868
Donor i	MRC1	47091.9	4653	11237.9	17097.5	1825.77	8364.48	13.0429	3900.1	0.802153	0.896739	1	0.621886	0.814367	0.72661
Donor i	MRC2	36582.7	1201	1556.03	18719.3	193.92	12420.2	361.116	2131.06	0.896409	0.560435	1	0.740003	0.646733	0.623949
Donor i	MYD88	23391.4	62	9.6041	12928	0	8097.01	126.86	2167.93	0.809602	0.129303	0	0.832942	0.400471	0.399294
Donor i	NCAN	27902.6	406	3489.64	18489.7	171.68	3269.9	180.517	1895.16	0.250821	0.309526	1	0.75501	0.363433	0.35772
Donor i	NFKB1	22114	23	82.109	11720.2	17.17	8254.95	46.1998	1970.32	0.832972	0.984109	1	0.304371	0.703985	0.703179
Donor i	NFKB2	31103	5266	6285.44	12791.8	612.97	3499.8	2.3635	2644.69	0.705386	0.248156	1	0.690276	0.458681	0.373799
Donor i	NFKBIA	5089.51	132	3884.08	77.8698	53.6109	241.125	3.4345	697.391	0.924104	0.63961	1	0.800828	0.912873	0.885416
Donor i	NLRC3	26050.5	1920	2145.46	16521.3	261.691	2099.79	81.8098	3020.4	0.77934	0.311579	1	0.734579	0.41011	0.375797
Donor i	NLRC4	42370.6	938	27664.4	5137.01	252.49	5576.58	0	2802.16	0.15141	0.562605	1	0.747845	0.297736	0.290678
Donor i	NLRC5	43432.2	12246	4131.67	22435.6	742.582	2039.37	26.9011	1810.15	0.880718	0.96342	1	0.836012	0.94385	0.665972
Donor i	NLRP1	16913.2	15	786.524	7242.01	0	6914.32	195.308	1760.05	0.0139335	0.976661	0	0.700807	0.798345	0.797545
Donor i	NLRP10	34429.2	21411	3069.32	6111.91	125.028	742.839	0	2969.11	0.89644	0.880091	1	0.5601	0.862922	0.275638
Donor i	NLRP11	34553.5	6755	4068.57	17128.1	97.96	4044.67	53.4528	2405.69	0.96149	0.318879	1	0.745505	0.49279	0.389071
Donor i	NLRP12	19695.5	212	604.935	8262.14	45.4401	8347.18	8.3057	2215.5	0.813984	0.509356	1	0.671696	0.599836	0.592558
Donor i	NLRP14	19338.9	1070	777.707	10547.5	48.4901	5083.1	12.9598	1799.17	0.860623	0.221004	1	0.692582	0.399185	0.374815
Donor i	NLRP2	45132.2	167	278.813	22427.7	13.13	18733.6	221.96	3289.94	0.803054	0.969503	1	0.447093	0.732305	0.729367
Donor i	NLRP2B	25542.5	14770	3851.03	4123.09	39.39	681.766	52.976	2024.21	0.902329	0.428751	1	0.522416	0.648425	0.24028
Donor i	NLRP3	29801.7	1481	2160.2	18406.3	994.66	5015.8	44.83	1698.92	0.716009	0.925307	1	0.730531	0.874331	0.828181
Donor i	NLRP4	39723.4	15236	2290.9	19075.8	150.45	1372.99	31.505	1565.66	0.934056	0.72686	1	0.856697	0.75718	0.454595
Donor i	NLRP5	65067.3	46976	4987.23	10185.6	649.442	539.818	16.8361	1712.34	0.736703	0.476024	1	0.711942	0.584061	0.15088
Donor i	NLRP6	6508.93	0	1220.91	2170.3	1.782	1393.38	152.475	1570.09	0.950386	0.934924	1	0.609434	0.844138	0.844138
Donor i	NLRP7	48992.7	1185	9344.37	18182.8	617.191	17246.3	100.159	2316.89	0.937281	0.677038	1	0.609461	0.709329	0.691282
Donor i	NLRP8	34088	16201	6969.97	6803.25	246.3	1163.04	34.875	2669.52	0.437218	0.840185	1	0.855575	0.658963	0.31879
Donor i	NLRP9	17215.7	666	874.75	12240.5	28.27	1504.92	67.1454	1834.14	0.805403	0.328803	1	0.649338	0.39149	0.374464
Donor i	NLRX1	20568.6	792	961.989	11050.1	77.76	5785.47	28.7456	1872.56	0.877959	0.863324	1	0.661298	0.799319	0.765406
Donor i	NOD1	25506.8	179	625.264	8036.37	349.381	12941	133.537	3242.28	0.872076	0.672467	1	0.490175	0.575902	0.571244
Donor i	NOD2	34813.3	287	58.0277	7963.53	0	23890.3	351.317	2263.16	0.933587	0.314468	0	0.792299	0.673315	0.667313
Donor i	OLR1	25351.3	670	2052.68	9744.72	128.26	10495.5	77.7511	2182.38	0.873532	0.225233	1	0.77133	0.54465	0.528846
Donor i	OR2D2-1	30400.9	9593	12769.1	3785.17	253.874	2200.98	1.9136	1796.84	0.963217	0.878803	1	0.376903	0.879013	0.584197
Donor i	OR2D2-2	45661.1	15691	19637.6	4205.42	428.826	3111.04	71.5393	2515.64	0.955845	0.895409	1	0.473162	0.892416	0.567326
Donor i	OR2D2-3	40264.7	10976	18950.6	3597.57	582.104	3127.43	9.1622	3021.81	0.957144	0.936191	1	0.422269	0.891517	0.62871
Donor i	OR2D2-4	48036.7	23358	18226.5	2366.6	455.652	1346.19	36.3135	2247.49	0.965136	0.887787	1	0.366777	0.921703	0.451151
Donor i	OR51T1-1	38850.5	6589	2511.47	20148.3	350.635	7187.36	37.6277	2026.07	0.77799	0.778696	1	0.753338	0.775172	0.636328
Donor i	OR51T1-2	38024.1	8324	2643.74	18336.4	381.75	6256.38	65.194	2016.7	0.849903	0.779414	1	0.761808	0.785222	0.60337
Donor i	OR51T1-3	35315.4	6787	3152.73	17777.7	407.01	5595.16	0.8478	1594.91	0.813489	0.699944	1	0.778145	0.734016	0.586275
Donor i	OR51T1-4	34494.7	4831	2278.96	19129.3	289.87	6117.82	129.237	1718.6	0.862523	0.756791	1	0.706452	0.756917	0.64491
Donor i	PAK1	30179.8	207	2733.25	13708.2	37.3801	11307.8	22.9846	2163.15	0.273446	0.892261	1	0.845716	0.812594	0.806585
Donor i	PIK3CD	31688.9	440	2213.8	23520.6	129.27	3843.1	17.9724	1524.08	0.696106	0.29369	1	0.672101	0.375707	0.370223
Donor i	PIK3CG	18251.1	30	11731.1	2947.92	0	2129.6	5.7384	1406.75	0.981027	0.281888	0	0.623909	0.813165	0.811717
Donor i	PILRA	25539.7	571	1904.3	12313.6	7.06	7230.47	42.1234	3471.12	0.980383	0.932401	1	0.812818	0.896382	0.873145
Donor i	PKD1	44808.8	1526	33391.4	6382.6	28.3305	1607.71	15.7315	1857.03	0.895716	0.957274	1	0.669687	0.8965	0.864637
Donor i	PKD1L3	34527.3	4504	2400.96	22297.1	420.676	2549.32	39.3302	2315.97	0.82598	0.815267	1	0.738393	0.811922	0.698255
Donor i	PLA2R1	21580	4070	1640.19	9802.37	407.051	4107.47	26.1703	1526.77	0.757668	0.0825832	1	0.743078	0.345392	0.2752
Donor i	PLCG1	969.804	0	18.1735	147.15	0	107.301	0.1898	696.99	0.891314	0.742335	0	0.660214	0.719945	0.719945
Donor i	PLCG2	32140.6	6981	20264	2138.17	192.011	718.215	27.232	1819.97	0.320416	0.977841	1	0.895474	0.404028	0.310921
Donor i	POLR2A-1	24098.1	907	673.978	9284.03	4.0703	10464.9	62.8998	2701.26	0.866216	0.540548	1	0.728012	0.647424	0.6199
Donor i	POLR2A-2	26706.3	449	332.65	12378.9	10.1	11268.6	14.9627	2252.06	0.691763	0.502513	1	0.78608	0.638542	0.626811
Donor i	POLR2A-3	16623.6	115	207.814	9265.77	0	5667.58	7.1257	1360.27	0.779462	0.603929	0	0.70011	0.642341	0.637499
Donor i	POLR2A-4	20035	276	166.571	8375.32	3.0401	9267.95	111.601	1834.47	0.66749	0.560581	1	0.718658	0.643903	0.634078
Donor i	PPP3R1	18105.7	28	889.503	5063.13	80.0251	9418.48	36.4581	2590.11	0.80092	0.409604	1	0.715147	0.621438	0.620314
Donor i	PRG2	27427.8	893	701.434	17010.6	8.08	4696.33	28.9853	4089.38	0.846161	0.505931	1	0.663794	0.549828	0.528764
Donor i	PRG3	9024.01	91	149.933	5195.86	21.2504	2445.57	16.7235	1103.67	0.927008	0.271101	1	0.7818	0.445534	0.440405
Donor i	PRKCD	24914.8	159	175.316	11434.1	93.9806	10526.2	48.9678	2477.31	0.835858	0.238603	1	0.695901	0.463073	0.459784
Donor i	PTPN11	28081.2	207	1098.26	10035.9	181.78	13990.1	157.305	2410.89	0.79708	0.951737	1	0.543091	0.719457	0.71362
Donor i	PTPN6	38360.5	33	8625.46	5504.61	3.03	17963.2	327.415	5903.81	0.949116	0.230079	1	0.456807	0.550276	0.549711
Donor i	PVR	39073	4030	13281.4	12668.3	401.92	6140.8	75.7642	2474.77	0.205248	0.86593	1	0.75583	0.576725	0.513087
Donor i	PYCARD	37248.3	263	72.2756	15104.3	134.32	16139.6	685.687	4849.02	0.973142	0.0585531	1	0.833087	0.462147	0.458315
Donor i	RAC1	22539.1	328	764.569	14942.2	251.46	4647.39	21.6628	1583.86	0.814818	0.405254	1	0.80785	0.518511	0.510386
Donor i	RAF1	38392.2	290	6874.76	10987.8	29.29	16891.7	337.289	2981.33	0.918507	0.743062	1	0.598721	0.707859	0.702006
Donor i	REG1A	39752.5	3221	1955.76	19508.1	39.5721	11180.4	12.279	3835.33	0.728891	0.787572	1	0.735228	0.766412	0.697658
Donor i	REG1B	32494.6	11064	6452.78	10630	121.24	2711.55	5.6238	1509.41	0.858229	0.307289	1	0.780661	0.554465	0.356444
Donor i	REG3A	24430.5	7410	1080.92	11685.1	66.65	1646.69	7.2906	2533.83	0.873399	0.670304	1	0.627614	0.682129	0.451214
Donor i	REG3G	9293.6	4835	808.265	2211.82	129.051	420.144	12.5318	876.783	0.911773	0.49755	1	0.729443	0.636814	0.270454
Donor i	REG4	7887.66	7	54.3959	5542.9	0	1464.47	10.3778	808.511	0.846312	0.466884	0	0.741827	0.526825	0.526303
Donor i	REL	23922.1	409	207.21	10473.6	46.4701	8739.81	12.4331	4033.59	0.955932	0.738821	1	0.791578	0.765441	0.74969
Donor i	RELA	28261.7	70	3315	14888.4	1.01	7635.58	264.01	2087.69	0.85422	0.405405	1	0.623998	0.527599	0.526174
Donor i	RELB	40306.8	216	1437.01	9056.28	1.01	11952.1	392.362	17252	0.968847	0.135931	1	0.656498	0.466481	0.462035
Donor i	RHOA	21869.7	14	5203.63	7214.24	2.0301	7439.02	50.5079	1946.24	0.986597	0.693856	1	0.771073	0.799519	0.798956
Donor i	RIPK1	6632.82	236	754.07	2663.94	47.4802	658.116	5.1389	2268.08	0.858458	0.500019	1	0.642299	0.59403	0.561873
Donor i	RIPK2	20288.5	0	95.5306	13207.6	0	5399.75	102.949	1482.6	0.98984	0.294401	0	0.718276	0.420331	0.420331
Donor i	RNF216	40501.7	176	339.795	15725.3	10.1	20938.9	53.085	3258.52	0.682605	0.614192	1	0.684015	0.654424	0.651327
Donor i	RPE65-1	24707.5	1690	3611.41	12152.7	157.55	5164.22	17.8003	1913.82	0.852853	0.780888	1	0.511023	0.728757	0.674682
Donor i	RPE65-2	20126.3	2829	2353.12	9495.19	165.812	3485.61	10.5536	1787.07	0.880918	0.794585	1	0.509351	0.745745	0.630641
Donor i	RPE65-3	25419.2	6263	2935.6	10655.7	140.592	3478.57	22.066	1923.72	0.838775	0.790195	1	0.514073	0.744386	0.545775
Donor i	RPE65-4	23792.3	1880	2425.54	12134.5	195.254	4950.54	9.6879	2196.8	0.881205	0.815969	1	0.518839	0.751177	0.685754
Donor i	SDC1	8925.97	36	55.2253	5346.6	0	2294.41	13.7814	1179.95	0.893779	0.807282	0	0.844196	0.818907	0.815095
Donor i	SDC2	53836.4	649	1521.98	34322.8	349.44	14129.2	127.053	2736.92	0.756657	0.706638	1	0.706587	0.710174	0.701132
Donor i	SDC3	29024.8	807	1532.47	20576.5	196.891	3281.67	0.1076	2630.18	0.711893	0.826484	1	0.552746	0.785848	0.761821
Donor i	SDC4	13207.2	31	56.9585	7580.78	28.28	3834.84	50.8287	1624.5	0.862321	0.364193	1	0.722667	0.487753	0.486442
Donor i	SELE	30410.1	1659	4766.18	11861.6	99.98	8694.68	27.513	3301.21	0.923253	0.716822	1	0.722317	0.758517	0.71205
Donor i	SELL	24294.6	26	36.7853	14007.3	0	8580.07	53.4857	1590.95	0.826781	0.958461	0	0.775198	0.888746	0.887726
Donor i	SELP	23718.5	3254	2197.67	12454.9	175.74	3901.19	5.9367	1729.11	0.83445	0.79808	1	0.644136	0.772177	0.657879
Donor i	SFTPA1	35668.3	17377	3172.08	10389	350.766	2001.64	20.5955	2357.19	0.839516	0.683944	1	0.620354	0.713923	0.341269
Donor i	SFTPA2	21158.9	3993	2502.26	9359.09	349.38	750.966	10.0222	4194.16	0.880513	0.104891	1	0.521804	0.302907	0.231569
Donor i	SFTPD	35371.3	841	144.606	23938.7	3.02	6911.55	239.859	3292.55	0.714418	0.690228	1	0.49512	0.646868	0.629782
Donor i	SIGLEC1	32459.4	714	1016.93	11910.9	25.25	16472	213.759	2106.61	0.898049	0.896492	1	0.677537	0.774065	0.755727
Donor i	SIGLEC10	43266.8	437	319.516	21457.3	6.06	16214.3	632.351	4200.3	0.976875	0.793683	1	0.665825	0.740696	0.732275
Donor i	SIGLEC11	38623.1	32289	3402.41	383.398	191.81	36.8852	6.5644	2313.02	0.858063	0.670314	1	0.907592	0.847369	0.0937036
Donor i	SIGLEC12	4268.25	46	397.806	1605.72	4.0804	1423.93	6.7378	783.972	0.993449	0.980897	1	0.437254	0.756788	0.746777
Donor i	SIGLEC14	21609.4	724	4915.77	7942.88	248.612	5004.41	70.3728	2703.39	0.6777	0.87938	1	0.747479	0.789852	0.759492
Donor i	SIGLEC15	30738.4	431	462.729	12951.1	45.6823	13800.7	129.591	2917.59	0.941396	0.493189	1	0.870487	0.692656	0.681875
Donor i	SIGLEC5	13535.9	2482	1695.03	5342.62	148.45	2374.39	6.5926	1486.83	0.858222	0.731365	1	0.601301	0.725725	0.576151
Donor i	SIGLEC6	20521.5	237	570.448	11331.3	63.6301	6411.12	376.447	1531.59	0.715331	0.758239	1	0.515139	0.672932	0.664364
Donor i	SIGLEC7	19002.5	17	688.002	5276	28.2206	10571.2	70.3298	2351.75	0.258821	0.929896	1	0.714228	0.764496	0.763712
Donor i	SIGLEC8	10228.6	114	246.557	2947.01	2.02	4220.61	19.4095	2678.97	0.296625	0.562765	1	0.499581	0.518077	0.510234
Donor i	SIGLEC9	27509.8	36	31.9917	8732.6	1.01	16125.7	161.131	2421.36	0.0907204	0.950162	1	0.730967	0.807055	0.805889
Donor i	SIGLECL1	13660.7	78	88.2711	6821.26	26.26	5168.01	78.7629	1400.11	0.359481	0.792328	1	0.574541	0.696633	0.692172
Donor i	SIRPA	27907.3	44	103.146	19002.1	1.01	4508.46	151.417	4097.2	0.650945	0.688083	1	0.55045	0.661658	0.660427
Donor i	SIRPB1	29933.3	1122	3315.5	18690.3	123.392	4742.57	74.4855	1865.02	0.893061	0.879463	1	0.644036	0.840144	0.806471
Donor i	SOCS1	5562.21	3	1678.44	157.098	23.22	674.383	10.3338	3015.74	0.972402	0.846253	1	0.452539	0.826431	0.825454
Donor i	SOCS3	3408.86	4	5.8292	1153.4	0	1412.86	50.5967	782.179	1	0.404131	0	0.64127	0.535742	0.53491
Donor i	SRC	10488.4	1	19.042	5918.72	0	2684.93	14.3667	1850.35	0.681205	0.69837	0	0.867237	0.750914	0.750827
Donor i	SSC5D	37876.6	4966	18322.6	7423.75	215.11	1796.56	117.711	5034.9	0.96242	0.697609	1	0.604874	0.868748	0.736912
Donor i	STAT1	30187.9	136	609.19	16124.2	73.72	10604.2	104.962	2535.65	0.931271	0.503823	1	0.587804	0.547145	0.544444
Donor i	STAT2	26237	41	10277.8	6975.06	0	5725.75	144.825	3072.55	0.989399	0.810025	0	0.777602	0.882176	0.880605
Donor i	SYK	30258.1	1978	2317.98	9915	269.645	12811.2	41.9857	2924.34	0.856328	0.332307	1	0.790107	0.619094	0.574225
Donor i	TAB1	39740	13216	7136.74	14739.2	254.621	2374.14	15.6203	2003.69	0.899286	0.28169	1	0.784957	0.517781	0.336369
Donor i	TAB2	34292.7	428	460.484	18003.7	310.242	11955.7	676.968	2457.54	0.922147	0.732561	1	0.72779	0.736246	0.726132
Donor i	TAB3	25833	745	3809.46	9800.33	304.883	8051.73	98.23	3023.34	0.902444	0.260249	1	0.424828	0.442213	0.427707
Donor i	TAS2R9-1	52100.2	11326	9892.35	24146.5	705.011	3556.01	96.3963	2377.94	0.949907	0.913686	1	0.755301	0.909925	0.702255
Donor i	TAS2R9-2	57458.5	5853	12364.1	30384.5	972.731	4746.04	50.4969	3087.57	0.969544	0.912847	1	0.761196	0.91421	0.815704
Donor i	TAS2R9-3	52371.7	9798	12026.1	21835.4	1136.46	4470.9	57.9962	3046.89	0.9344	0.921146	1	0.733499	0.906199	0.725978
Donor i	TAS2R9-4	54269.9	13177	9018.84	25149.7	978.703	3619.04	51.1294	2275.53	0.91117	0.913976	1	0.737883	0.899056	0.670983
Donor i	TBK1	14263.7	7	83.099	8135.34	1.01	4754.47	7.0116	1275.8	0.922529	0.504798	1	0.76511	0.602907	0.602582
Donor i	THBD	13122.8	185	10475.7	60.5736	890.265	214.652	16.9166	1279.65	0.461187	0.379007	1	0.847291	0.509084	0.501121
Donor i	TICAM1	45117.3	4002	11076.6	21522.6	1105.2	4348.04	41.2122	3021.69	0.852749	0.231281	1	0.54841	0.470746	0.425949
Donor i	TICAM2	19918.9	178	141.696	9713.65	24.24	7905.07	55.6505	1900.6	0.81858	0.793965	1	0.796475	0.795558	0.787674
Donor i	TIFA	38638.5	6153	10263.3	15490.1	401.152	4603.56	1.2914	1726.18	0.972847	0.70816	1	0.685538	0.796901	0.664059
Donor i	TIRAP	18671	472	663.7	8523.71	51.51	6934.48	41.2082	1984.36	0.851653	0.934999	1	0.381826	0.694609	0.674912
Donor i	TLR1	26868	1839	9227.56	10040.9	364.671	3272.46	15.2365	2108.21	0.254109	0.949044	1	0.766874	0.643874	0.596022
Donor i	TLR10	36195.7	1224	6558.86	12779.5	322.18	12795	31.165	2484.97	0.543759	0.938073	1	0.639642	0.741351	0.714408
Donor i	TLR2	19799.2	115	96.0752	11471.3	12.12	6835.15	5.4343	1264.1	0.740562	0.729196	1	0.54035	0.659338	0.655246
Donor i	TLR2 (from TLR4+TLR2 double)	21757.3	200	394.44	13797.9	3.03	5922.35	95.4138	1344.13	0.676468	0.769126	1	0.551118	0.703166	0.696244
Donor i	TLR3	50702.1	1029	9311.53	18425.2	58.7416	17982.9	81.8314	3812.93	0.953597	0.400377	1	0.521426	0.561225	0.548887
Donor i	TLR4	26126.3	177	99.0396	11148.8	0	11797.7	115.779	2787.94	0.461633	0.277309	0	0.746832	0.518464	0.514512
Donor i	TLR4 (from TLR4+TLR2 double)	338291	1634	7639.95	146053	390.972	155474	1774.18	25324.9	0.777993	0.495078	1	0.715628	0.613469	0.610247
Donor i	TLR5	48334.5	481	1225.75	21747	14.14	21495.6	551.007	2819.93	0.791571	0.33086	1	0.674673	0.509911	0.504456
Donor i	TLR6	44874.9	935	1057.24	32344.6	229.654	6798.47	182.603	3327.34	0.881531	0.665561	1	0.780635	0.692459	0.676807
Donor i	TLR7	47596.9	2103	1477.79	26767	240.36	13457.3	28.028	3523.46	0.884373	0.543568	1	0.488383	0.540485	0.514679
Donor i	TLR8	5541.08	39	1131.28	1664.45	28.27	1873.7	30.8315	773.548	0.475368	0.249367	1	0.671838	0.476813	0.472887
Donor i	TLR9	9773.38	67	118.857	5157.44	2.0301	2548.9	24.5068	1854.64	0.865026	0.64271	1	0.580721	0.625992	0.620679
Donor i	TMEM173	28254.3	1186	380.082	17287.9	134.542	6955.27	30.7639	2279.73	0.824665	0.788298	1	0.51727	0.713866	0.681232
Donor i	TNF-1	27962.5	214	1239.83	11547.1	46.43	10667	104.513	4143.59	0.169867	0.189445	1	0.779186	0.457702	0.453572
Donor i	TNF-2	27960.7	106	1587.91	13022.1	149.4	10348	60.0615	2687.27	0.238533	0.22173	1	0.814728	0.471827	0.469844
Donor i	TNF-3	32582.6	337	2993.99	13351.1	105.99	12866.4	18.3971	2909.77	0.247105	0.220129	1	0.797606	0.479138	0.473693
Donor i	TNF-4	17291.8	295	1748.06	6571.58	75.75	6322.69	12.739	2266.01	0.269682	0.221866	1	0.779221	0.470982	0.461728
Donor i	TNFAIP3	29525.1	231	9371.04	6623.78	59.4705	11016.4	21.5326	2201.88	0.868346	0.48832	1	0.551685	0.646784	0.641311
Donor i	TRAF3	32547.1	893	4707.6	20875.4	374.64	4355.5	14.7195	1326.26	0.743212	0.732659	1	0.673092	0.729043	0.708181
Donor i	TRAF6	29700.9	1992	1754.33	16350.3	445.795	7079.81	15.6755	2063.02	0.720578	0.749594	1	0.66328	0.728121	0.675612
Donor i	TREM1	31282.2	2043	3717.24	13375.2	52.7827	9896.22	61.2579	2136.47	0.504737	0.946793	1	0.686758	0.790966	0.735405
Donor i	TREM2	34529.4	644	128.392	20676.7	90.9102	10935.3	46.5166	2007.58	0.721775	0.930954	1	0.416645	0.753622	0.738677
Donor i	TRHR-1	36365.7	17926	5867.83	7552.09	1995.64	780.918	37.5157	2205.75	0.8957	0.404613	1	0.503685	0.660666	0.31359
Donor i	TRHR-2	46110.6	20999	8729.97	9282.02	3131.74	1574.11	1.2456	2392.54	0.825999	0.382599	1	0.396203	0.639042	0.332084
Donor i	TRHR-3	35630.7	22219	4032.22	4522.47	1030.96	455.07	0	3370.97	0.883046	0.25187	1	0.576751	0.596883	0.185778
Donor i	TRHR-4	43312.9	22186	6942.29	9503.6	1716.89	1129.19	12.366	1822.53	0.880896	0.387044	1	0.489591	0.625311	0.290841
Donor i	TRIM47	33019.4	154	11.7947	12967.8	1.01	16636.2	198.906	3049.74	1	0.854586	1	0.805545	0.827102	0.822823
Donor i	TYROBP	13921.1	316	1133.71	4595.27	83.8404	5886.19	1.9355	1904.18	0.857863	0.935479	1	0.464069	0.691236	0.673057
Donor i	U2AF2-1	37583.1	2515	6442.66	16119.9	204	8585.74	674.955	3040.83	0.934116	0.782144	1	0.785833	0.815801	0.755219
Donor i	U2AF2-2	46789.9	7209	9735.09	17009.2	201.97	9155.79	296.361	3182.49	0.948036	0.835446	1	0.78239	0.853271	0.711247
Donor i	U2AF2-3	37135.5	6464	5894.25	15733.9	109.04	6096.1	257.798	2580.51	0.94863	0.775751	1	0.754409	0.808566	0.656175
Donor i	U2AF2-4	43333.3	2100	6657.92	20425.7	126.24	10963.9	198.852	2860.68	0.932961	0.812184	1	0.768324	0.821273	0.778449
Donor i	UBE2N	3546.62	196	2273.93	9.9215	8.1002	233.029	16.4996	809.138	0.219202	0.646142	1	0.678577	0.26578	0.246635
Donor i	UNC93B1	13701.9	124	242.048	5629.48	27.2801	5988.77	26.3458	1663.95	0.696264	0.646559	1	0.618572	0.634282	0.627735
Donor i	VAV1	12471.3	81	1650.66	6597.98	7.06	2528.35	27.8024	1578.45	0.740827	0.423992	1	0.6789	0.532629	0.528658
Donor i	VCAN	34743.6	2091	2836.7	18202.5	348.743	7421.49	27.6895	3815.49	0.823676	0.548354	1	0.642424	0.605163	0.564213
Donor i	VSIR	39846.3	2992	6022.39	13806.5	45.4702	13055.3	80.3892	3844.22	0.936074	0.916743	1	0.566278	0.781448	0.716359
Donor i	ZFP36	12354.3	44	8.8815	3629.84	1.01	7022.03	38.0058	1610.49	1	0.653566	1	0.831162	0.770855	0.767687
Donor i (independent PCRs)	AIM2	6538.62	26	339.242	2286.32	4.0501	1949.68	4.1258	1929.21	0.907254	0.270558	1	0.468516	0.402653	0.40038
Donor i (independent PCRs)	ALCAM	21770.1	134	6910.08	6730.39	281.841	1916.16	5.0797	5792.59	0.77188	0.878584	1	0.719708	0.81497	0.808133
Donor i (independent PCRs)	ALPK1	9388.93	1109	482.983	3270.31	73.7503	931.475	0.6678	3520.74	0.84731	0.824634	1	0.827595	0.830233	0.673313
Donor i (independent PCRs)	ASGR1	13458.7	47	2326.49	3627.56	7.07	5964.74	96.2065	1389.65	0.963637	0.693151	1	0.47144	0.63521	0.632716
Donor i (independent PCRs)	ATRN	29706.8	553	105.362	13301.9	3.03	12558.9	83.1066	3101.49	0.156635	0.557538	1	0.703919	0.626754	0.613686
Donor i (independent PCRs)	ATRNL1	13369.6	113	4903.56	1234.63	15.1601	2880.01	1.1718	4222.07	0.131434	0.146495	1	0.78857	0.344458	0.340202
Donor i (independent PCRs)	BIRC2	6873.48	13	207.106	2862.78	4.03	1348.86	14.1436	2423.57	0.929979	0.912862	1	0.675157	0.841248	0.838782
Donor i (independent PCRs)	BIRC3	9758.05	103	1253.69	4634.89	9.09	2725.49	2.2168	1029.68	0.930582	0.309977	1	0.749618	0.539887	0.533515
Donor i (independent PCRs)	CALM1	34476	236	324.711	20183.5	332.23	10603.3	49.3444	2746.83	0.791911	0.810875	1	0.649139	0.758138	0.75249
Donor i (independent PCRs)	CD180	29482.5	507	5287.01	7582.66	124.21	14181.1	61.0882	1739.47	0.925961	0.28185	1	0.538608	0.544435	0.534463
Donor i (independent PCRs)	CD1C	17310.2	177	98.1848	8830.81	6.06	5479.81	42.2478	2676.13	0.94235	0.924908	1	0.705116	0.841504	0.831297
Donor i (independent PCRs)	CD1D	36640.4	265	1074.25	9279.89	3.0101	23601.7	32.747	2383.77	0.0970548	0.939364	1	0.716781	0.758027	0.752158
Donor i (independent PCRs)	CD207	21463.7	1254	2480.1	10622.6	43.6321	4218.24	1.2666	2843.82	0.876336	0.691663	1	0.609107	0.698759	0.651696
Donor i (independent PCRs)	CD209	41874.7	245	1011.37	25076.8	38.2612	12077.1	1194.08	2232.13	0.216584	0.0783482	1	0.86181	0.330602	0.328496
Donor i (independent PCRs)	CD248	39145.8	13115	5974.57	12320.5	3468.7	2420.11	78.9009	1767.99	0.592868	0.520656	1	0.711769	0.626373	0.406128
Donor i (independent PCRs)	CD274	26896.6	365	9161.48	9604.09	26.2804	6030.99	138.885	1569.87	0.955773	0.364905	1	0.667182	0.657093	0.647571
Donor i (independent PCRs)	CD276	16961.4	93	278.857	10640.1	4.04	2303.72	2.7053	3639.04	0.865289	0.892985	1	0.555327	0.833624	0.827803
Donor i (independent PCRs)	CD300A	44153.6	521	688.612	25342.2	111.07	14891.7	32.1307	2566.93	0.869915	0.284453	1	0.715822	0.452765	0.447088
Donor i (independent PCRs)	CD300C	25303.8	274	2487.59	5986.71	3.03	13906	113.358	2533.08	0.667712	0.816007	1	0.718744	0.739125	0.730187
Donor i (independent PCRs)	CD300E	11849.4	498	743.064	6912.68	154.52	1426.84	33.5256	2080.72	0.758711	0.799355	1	0.61623	0.771155	0.731707
Donor i (independent PCRs)	CD300LB	11029.6	52	1608.25	3112.37	0	4453.61	11.8322	1791.56	0.440699	0.768022	0	0.668908	0.662527	0.658793
Donor i (independent PCRs)	CD300LF	17493	302	13373.6	86.7803	98.9701	1602.87	22.5573	2006.17	0.478774	0.786264	1	0.791979	0.517047	0.506949
Donor i (independent PCRs)	CD302	22774.2	4223	2693.31	10593.6	481.5	1777.75	184.297	2820.74	0.66651	0.925319	1	0.637201	0.849847	0.668307
Donor i (independent PCRs)	CD69	27459.4	1032	255.166	13852	12.11	9792.24	2.0608	2513.8	0.957145	0.913076	1	0.766346	0.853501	0.818189
Donor i (independent PCRs)	CD72	5554.27	11	151.363	2383.62	2.02	2048.55	4.3909	953.327	0.97429	0.664644	1	0.788971	0.730555	0.728806
Donor i (independent PCRs)	CEBPB	4267.29	5	37.7986	1304.19	7.0801	1574.34	8.5826	1330.29	0.906785	0.830093	1	0.772902	0.800697	0.79933
Donor i (independent PCRs)	CHODL	38919.7	8133	4749.83	15821.3	75.7805	5969.88	48.786	4121.11	0.786038	0.923611	1	0.694361	0.84786	0.649423
Donor i (independent PCRs)	CLC	29595.5	11387	1932.22	11302.5	445.16	1734.59	10.5503	2783.41	0.588275	0.533895	1	0.77837	0.581683	0.334547
Donor i (independent PCRs)	CLEC11A	5852.75	2156	615.058	1514.86	23.22	153.893	7.2988	1382.42	0.765107	0.865585	1	0.663786	0.826689	0.427333
Donor i (independent PCRs)	CLEC12A	26134.5	545	2922.83	13765.2	44.43	5895.38	0.577	2961.17	0.308888	0.814262	1	0.748445	0.7322	0.71498
Donor i (independent PCRs)	CLEC12B	15415.8	648	2287.76	8768.21	98.91	2938.57	40.9355	633.373	0.824937	0.463256	1	0.70753	0.576666	0.551317
Donor i (independent PCRs)	CLEC14A	30755.4	7404	3673.18	13273	465.207	3593.98	67.7242	2278.33	0.859414	0.496977	1	0.742078	0.613433	0.453561
Donor i (independent PCRs)	CLEC17A	26570	1610	358.437	15608.3	146.44	5916.74	36.8226	2893.25	0.909382	0.834586	1	0.676705	0.794499	0.74039
Donor i (independent PCRs)	CLEC18C	22911	18801	2801.73	0	149.531	0	15.0819	1143.63	0.782968	0	1	0	0.793965	0.107722
Donor i (independent PCRs)	CLEC19A	7458.14	126	1089.68	2166.75	36.32	2165.15	2.3616	1871.88	0.184365	0.700073	1	0.856329	0.661094	0.646176
Donor i (independent PCRs)	CLEC1A	37831.8	1099	18673.6	11144.9	241.32	4123.66	3.0607	2546.24	0.974273	0.695675	1	0.632068	0.842342	0.816104
Donor i (independent PCRs)	CLEC20A	9516.5	154	101.45	6255.93	6.06	1991.68	10.814	996.568	0.68424	0.635117	1	0.790542	0.673028	0.660848
Donor i (independent PCRs)	CLEC2A	5670.74	38	50.7766	3871.41	14.14	839.211	29.1059	828.091	0.597909	0.781194	1	0.696328	0.764979	0.75894
Donor i (independent PCRs)	CLEC3A	71944.4	11798	14772.3	36957.2	117.11	4900.06	3.7776	3396.03	0.920216	0.695702	1	0.773439	0.761488	0.630419
Donor i (independent PCRs)	CLEC4A	13346.4	914	993.808	8023.19	117.281	2733.35	7.0978	557.723	0.867771	0.805029	1	0.779019	0.80622	0.748568
Donor i (independent PCRs)	CLEC4C	44045.9	82	57.949	18906.7	0	22921.2	77.9007	2000.1	0.555571	0.496972	0	0.601908	0.554477	0.553394
Donor i (independent PCRs)	CLEC4F	38046.7	338	11296.1	10603.7	3.03	13145.8	48.3467	2611.7	0.997225	0.372638	1	0.653488	0.679335	0.672846
Donor i (independent PCRs)	CLEC4G	10171.2	29	29.1842	4699.8	11.11	3552.62	49.6679	1799.77	1	0.914522	1	0.724958	0.833728	0.830822
Donor i (independent PCRs)	CLEC4M	28747.2	390	3339.37	10227.5	4.04	13102.5	12.942	1670.79	0.0592745	0.104134	1	0.752913	0.417346	0.411331
Donor i (independent PCRs)	CLEC5A	64463.6	12232	5285.16	31856.6	443.603	8603.37	134.034	5908.86	0.802918	0.580912	1	0.698034	0.632156	0.499796
Donor i (independent PCRs)	CLEC6A	7473.18	0	21.9478	3005.04	10.0701	3614.66	70.9632	750.499	1	0.142328	1	0.787746	0.497188	0.497188
Donor i (independent PCRs)	CLEC7A	43540.4	109	126.59	18090.6	7.07	20995.3	230.874	3980.88	0.984665	0.775287	1	0.43429	0.593458	0.591814
Donor i (independent PCRs)	COLEC11	23053.7	8862	8602.46	3151.75	201.92	995.913	32.7896	1206.91	0.140258	0.0913518	1	0.897341	0.199974	0.118734
Donor i (independent PCRs)	CREB1	65146.7	452	11581.1	35671.2	22.22	14815.4	64.9076	2539.85	0.965703	0.568292	1	0.694698	0.672734	0.667872
Donor i (independent PCRs)	CRX-2	14427.7	397	2027.89	8528.12	21.2302	1987.05	119.562	1346.8	0.928596	0.378011	1	0.656978	0.512045	0.496362
Donor i (independent PCRs)	CRX-3	45931.6	1887	7648.26	25688.6	221.07	6567.62	119.17	3799.84	0.911245	0.392359	1	0.661725	0.5387	0.514504
Donor i (independent PCRs)	DDX3X	15734.1	187	168.194	5897.33	6.06	7641.18	35.257	1799.13	0.929976	0.161374	1	0.877226	0.570067	0.562398
Donor i (independent PCRs)	DDX58	29669.4	648	6515.05	7687.78	187.961	11490.6	23.3994	3116.61	0.100876	0.478518	1	0.783391	0.522597	0.509833
Donor i (independent PCRs)	DGCR2	2583.16	37	584.92	1496.96	0	315.995	0.639	147.653	0.942618	0.648173	0	0.655538	0.720969	0.710013
Donor i (independent PCRs)	DHX58	3987.21	38	587.442	1176.18	27.27	1047.97	34.752	1075.6	0.659465	0.842533	1	0.641741	0.732041	0.722372
Donor i (independent PCRs)	F13B-3	46822.2	13272	11782.2	12840.1	287.81	6170.89	24.8024	2444.43	0.589675	0.894367	1	0.595121	0.72043	0.504851
Donor i (independent PCRs)	FCER1G	43085.9	72	236.484	16137.3	13.13	24594	50.8326	1982.21	0.219395	0.922301	1	0.494197	0.66135	0.66019
Donor i (independent PCRs)	FCGR1A	47028.9	5077	10433.4	0	4276.7	0	24.0812	27217.7	0.899841	0	1	0	0.92896	0.690607
Donor i (independent PCRs)	FCN2	48629.7	10487	11108.6	21757.7	43.35	3926.84	32.2567	1273.98	0.855778	0.374199	1	0.748902	0.560108	0.435986
Donor i (independent PCRs)	FCN3	25124.9	91	5644.83	9092.9	2.02	8549.19	54.9436	1689.99	0.961578	0.894256	1	0.789891	0.872271	0.868876
Donor i (independent PCRs)	HAVCR2	54176	60	1670.69	16110.9	1.01	33673.1	78.8837	2581.38	0.238896	0.942275	1	0.742369	0.788619	0.7877
Donor i (independent PCRs)	HMGB1	60576.6	362	54589.5	44.33	2584.17	0	211.394	2785.2	0.824393	0.87778	1	0	0.832365	0.827132
Donor i (independent PCRs)	IGSF6	18730	5	1.672	9097.23	0	6808.05	98.1198	2719.91	0	0.349485	0	0.579684	0.447972	0.447831
Donor i (independent PCRs)	IKBKG	22620.2	125	11.9008	7968.32	0	11073.1	139.376	3302.59	0.918442	0.214843	0	0.81723	0.565367	0.561682
Donor i (independent PCRs)	IL10	39665.2	363	1871.98	22547.8	379.58	10664.4	103.474	3735.02	0.921377	0.800807	1	0.621195	0.755292	0.747639
Donor i (independent PCRs)	IL1B	9598.43	314	2691.41	3529.23	165.651	1693.39	29.8834	1174.87	0.925817	0.332951	1	0.893658	0.661632	0.636881
Donor i (independent PCRs)	IL1RL1	4626.03	378	861.558	1204.78	17.16	847.703	2.2839	1314.54	0.822927	0.797181	1	0.606243	0.750716	0.664964
Donor i (independent PCRs)	IRAK4	10561	499	386.742	6653.02	117.04	2329.19	35.8823	540.109	0.777993	0.65498	1	0.629636	0.658029	0.625144
Donor i (independent PCRs)	KCNV1-1	5834.9	340	146.987	2724.05	8.08	1049.85	0	1565.94	0.862175	0.670162	1	0.732227	0.694608	0.639286
Donor i (independent PCRs)	KCNV1-3	9156.8	1523	372.811	3929.84	26.25	1619.85	0.3553	1684.7	0.863472	0.696158	1	0.750336	0.722737	0.575418
Donor i (independent PCRs)	KCNV1-4	9540.53	605	247.043	4260.51	4.0703	2249.55	0.2798	2174.07	0.822396	0.725116	1	0.77	0.74377	0.682682
Donor i (independent PCRs)	KLRB1	17535.4	4	308.791	8844.47	1.0303	7213.8	3.9208	1159.38	0.669281	0.790611	1	0.465788	0.645178	0.64502
Donor i (independent PCRs)	KLRC1	22498.4	153	415.966	9339.91	4.04	9889.16	61.2961	2635.05	0.931054	0.695652	1	0.742705	0.724379	0.718782
Donor i (independent PCRs)	KLRD1	39181.3	2355	15705	9547.96	256.966	8936.78	30.5837	2348.97	0.980391	0.964094	1	0.253993	0.787565	0.737167
Donor i (independent PCRs)	KLRF1	41706.4	962	1647.81	26746.9	674.56	10026.9	24.1239	1624.13	0.827368	0.758583	1	0.593661	0.72335	0.705979
Donor i (independent PCRs)	KLRG1	5962.48	30	171.181	3240.31	11.1706	1708.81	1.1744	799.828	0.954969	0.904274	1	0.661366	0.825284	0.820487
Donor i (independent PCRs)	KLRG2	18923.4	3325	1609.95	9040.76	52.5202	3590.29	45.9589	1258.9	0.804887	0.844829	1	0.783553	0.825509	0.669717
Donor i (independent PCRs)	KLRK1	30641	306	164.858	18708.4	31.5322	6576.81	3.0031	4850.32	0.915311	0.310168	1	0.647313	0.401954	0.397184
Donor i (independent PCRs)	LALBA-2	49160.4	1978	7891.13	20223.7	578.45	12495.4	96.3043	5897.4	0.33886	0.881031	1	0.67411	0.716057	0.683245
Donor i (independent PCRs)	LALBA-3	47368.6	2952	5868.48	20612.5	980.241	13334.5	11.8239	3609.1	0.431683	0.875366	1	0.647564	0.740077	0.690139
Donor i (independent PCRs)	LALBA-4	51135.9	1724	5806.36	24041	583.712	15805.1	24.4587	3151.22	0.400635	0.889165	1	0.680182	0.757777	0.730537
Donor i (independent PCRs)	LBP	29320.8	5775	20231	356.75	275.67	1121.61	114.797	1445.97	0.151503	0.112776	1	0.681095	0.188532	0.149311
Donor i (independent PCRs)	LGALS1	23495.2	112	1707.14	14052.4	20.19	6108.67	52.8709	1441.94	0.92894	0.798549	1	0.567288	0.744363	0.740574
Donor i (independent PCRs)	LGALS13	21548.8	2247	7751.32	6391.13	64.7916	2708.01	66.9577	2319.58	0.957111	0.726145	1	0.678209	0.825358	0.728575
Donor i (independent PCRs)	LGALS14	37299.5	5928	3354.1	23171.1	207.051	2841.85	24.5529	1772.85	0.843321	0.879172	1	0.617651	0.850822	0.708755
Donor i (independent PCRs)	LGALS16	39660.7	2094	1567.58	30911.9	241.36	2935.69	85.3225	1824.8	0.324351	0.662493	1	0.715018	0.654236	0.617946
Donor i (independent PCRs)	LGALS2	30476.1	4865	2033.56	17680.6	592.76	2440.44	6.3779	2857.43	0.882564	0.734458	1	0.702403	0.751179	0.618829
Donor i (independent PCRs)	LGALS3	21788.5	430	1198.01	8250.64	155.56	8880.34	15.8577	2858.05	0.901701	0.439978	1	0.605736	0.554249	0.541649
Donor i (independent PCRs)	LGALS4	22058.6	6645	11956.7	804.271	485.942	300.509	26.575	1839.63	0.949082	0.543384	1	0.759627	0.922621	0.619001
Donor i (independent PCRs)	LGALS8	18405	717	3938.23	9557.19	25.25	2411.63	2.75	1753	0.942984	0.344471	1	0.733135	0.552284	0.5285
Donor i (independent PCRs)	LGALS9B	25934.6	11963	7213.19	1.7013	1238.62	5.8236	26.7097	5485.56	0.910067	0	1	0	0.922425	0.382087
Donor i (independent PCRs)	LGALS9C	39780.3	8031	28331.8	0.5671	2150.24	32.6689	91.9931	1141.95	0.954869	0	1	0.390093	0.957427	0.75795
Donor i (independent PCRs)	LMAN1L	18273.4	221	175.288	13162.9	6.0903	2828.62	37.0296	1842.48	0.935202	0.867134	1	0.732993	0.844461	0.833077
Donor i (independent PCRs)	LMAN2	18552.9	21	1059.79	7696.81	0	6815.23	92.2325	2867.84	0.469445	0.847054	0	0.739917	0.774465	0.773422
Donor i (independent PCRs)	LMAN2L	24763.8	226	735.057	16951.5	94.2229	5379.42	9.0545	1368.6	0.785699	0.697235	1	0.702714	0.702547	0.695757
Donor i (independent PCRs)	LY75	35937	334	123.489	21436.8	13.12	10945.6	46.3534	3037.54	0.924152	0.812027	1	0.496907	0.706462	0.69928
Donor i (independent PCRs)	LY86	44314.3	172	431.634	20611.3	47.45	18109.5	183.629	4758.79	0.978023	0.714592	1	0.758373	0.738064	0.73484
Donor i (independent PCRs)	LY9	71694.3	522	16395.3	24644.4	249.5	24293.4	112.92	5476.87	0.279162	0.915415	1	0.707922	0.679816	0.674448
Donor i (independent PCRs)	MAG	12682.6	63	1777.49	3889.87	14.14	5281.41	9.9481	1646.75	0.151698	0.859589	1	0.832872	0.732124	0.727941
Donor i (independent PCRs)	MAP3K1	24984.9	80	11609.5	6666.93	504.27	3187.41	569.286	2367.56	0.949104	0.480395	1	0.788956	0.784791	0.781943
Donor i (independent PCRs)	MAP3K14	6756.24	20	21.1234	2651.19	3.0401	1395.94	12.7872	2652.16	0.783425	0.484268	1	0.647593	0.542205	0.539554
Donor i (independent PCRs)	MAP3K7	43851.7	785	1990.77	31463.2	402.122	7841.28	60.0643	1309.25	0.863165	0.976183	1	0.779985	0.934121	0.91686
Donor i (independent PCRs)	MAPK14	9422.06	6	6525.66	451.006	10.09	1337.18	8.0899	1084.04	0.941995	0.856031	1	0.664657	0.892855	0.892212
Donor i (independent PCRs)	MAVS	23053.3	995	2121.27	16025.2	148.46	2937.27	61.8523	764.267	0.917291	0.912532	1	0.745523	0.890515	0.850651
Donor i (independent PCRs)	MB21D1	12498.7	91	312.6	4064.17	19.18	6960.38	19.9128	1031.5	0.925495	0.754475	1	0.47171	0.586288	0.581628
Donor i (independent PCRs)	MBL2	20287	415	696.291	11112.6	25.25	5487.49	67.3366	2483.04	0.931991	0.631906	1	0.717096	0.671493	0.655782
Donor i (independent PCRs)	MRC1	40125.8	2416	7596.38	20992.3	838.091	6544.54	343.229	1395.17	0.821008	0.939206	1	0.656889	0.864298	0.809901
Donor i (independent PCRs)	MRC2	44082.2	1162	1360.21	25389.2	220.201	13583.7	54.3083	2312.56	0.878833	0.630553	1	0.755699	0.682806	0.663786
Donor i (independent PCRs)	MYD88	21445.2	49	2.9605	11606.3	0	7854.91	111.463	1820.57	1	0.11496	0	0.842114	0.408543	0.407517
Donor i (independent PCRs)	NCAN	27194	323	4130.27	17297	60.59	3569.95	77.9741	1735.25	0.183264	0.29828	1	0.703563	0.338759	0.334448
Donor i (independent PCRs)	NFKB1	37187.8	144	283.717	20057.9	60.59	14201.9	92.4881	2347.28	0.990131	0.975952	1	0.283267	0.691825	0.688958
Donor i (independent PCRs)	NFKB2	37865.5	6540	7171.37	15349.2	918.768	4685.7	502.489	2697.93	0.702527	0.270424	1	0.743968	0.483329	0.392143
Donor i (independent PCRs)	NLRC3	14492.3	1213	1078.89	9837.74	132.25	1117.95	4.2149	1108.21	0.821481	0.319136	1	0.756838	0.411301	0.374013
Donor i (independent PCRs)	NLRC5	58284.3	16282	5985.02	29891.9	865.601	2432.2	34.012	2793.6	0.874204	0.94989	1	0.883126	0.935289	0.66069
Donor i (independent PCRs)	NLRP1	23296	89	941.262	10881.6	0	9187.05	54.4835	2142.6	0.0101074	0.986927	0	0.743064	0.836529	0.833001
Donor i (independent PCRs)	NLRP10	17184.4	8923	1408.47	2738.68	126.19	462.77	0	3525.26	0.885968	0.896006	1	0.823179	0.888676	0.308136
Donor i (independent PCRs)	NLRP11	23797.3	4527	2844.49	12278.1	152.733	2837.46	67.6784	1089.8	0.962942	0.29649	1	0.732339	0.475361	0.380309
Donor i (independent PCRs)	NLRP13	19900.3	2737	4850.88	6070.1	41.37	4629.51	15.845	1555.61	0.430945	0.261405	1	0.784131	0.471318	0.400937
Donor i (independent PCRs)	NLRP2	60449	222	335.527	32211.9	21.21	24475.3	36.8729	3146.14	0.811996	0.969643	1	0.420475	0.733101	0.730259
Donor i (independent PCRs)	NLRP2B	42201.2	23027	6341.83	8005.24	125.715	1222.27	74.8059	3404.38	0.911445	0.488049	1	0.6377	0.674883	0.273548
Donor i (independent PCRs)	NLRP4	52465.9	20207	3451.69	24458.6	370.661	2190.86	190.511	1596.59	0.841244	0.769817	1	0.844345	0.786066	0.47264
Donor i (independent PCRs)	NLRP5	81340.4	58708	5446.62	13647.2	496.84	417.076	186.809	2437.85	0.697991	0.455132	1	0.653237	0.538904	0.136977
Donor i (independent PCRs)	NLRP8	57652.8	28648	12190.6	13822.4	112.07	1684.84	86.9081	1107.94	0.413807	0.843431	1	0.630073	0.642808	0.316633
Donor i (independent PCRs)	NOD2	21037.4	87	103.02	5577	4.04	12643.1	33.4436	2589.74	0.854569	0.337049	1	0.755907	0.629056	0.626084
Donor i (independent PCRs)	OLR1	7991.7	177	409.409	2445.48	30.3102	2545.13	8.1433	2376.24	0.816783	0.24295	1	0.771243	0.538043	0.521059
Donor i (independent PCRs)	OR2D2-2	36446.5	10700	16340.3	3883.05	372.61	2724.44	26.693	2399.36	0.971348	0.942638	1	0.400622	0.900349	0.617174
Donor i (independent PCRs)	OR2D2-4	33604.3	15740	12821.7	1371.58	385.861	1098.83	18.3078	2167.96	0.961012	0.863818	1	0.368726	0.911957	0.455079
Donor i (independent PCRs)	OR51T1-1	56876.1	7941	3601.99	31706.1	494.84	10775.2	78.0031	2278.97	0.861654	0.76634	1	0.754232	0.773392	0.660743
Donor i (independent PCRs)	PIK3CG	27959.4	38	18520.1	4381.18	0	3385.64	20.5814	1613.84	0.9768	0.349328	0	0.687594	0.834972	0.833767
Donor i (independent PCRs)	PILRA	35424.9	630	2268.35	18739.6	0	12071.6	24.9546	1690.35	0.933882	0.909486	0	0.829247	0.881877	0.865396
Donor i (independent PCRs)	PKD1	69112.6	1960	50140.8	12450.4	49.48	2810.44	65.8344	1635.53	0.884308	0.961434	1	0.690136	0.890729	0.864831
Donor i (independent PCRs)	PLA2R1	21296.2	4038	1696.64	9441.43	392.931	3971.9	45.3824	1709.92	0.805358	0.0886531	1	0.73873	0.35674	0.283022
Donor i (independent PCRs)	PLCG1	19397.3	144	4588.18	6428.53	54.53	6482.75	45.9342	1653.41	0.854047	0.706924	1	0.546836	0.687168	0.681577
Donor i (independent PCRs)	POLR2A-3	38282.4	855	438.154	18663.8	3.03	16599.5	64.0657	1658.87	0.7858	0.544454	1	0.697535	0.618624	0.604156
Donor i (independent PCRs)	POLR2A-4	36959	318	454.303	16726.4	1.01	18090.5	54.6383	1314.09	0.475591	0.591382	1	0.687522	0.639211	0.6335
Donor i (independent PCRs)	PPP3R1	7353.63	33	340.312	1896.24	50.3372	3846.33	15.2631	1172.15	0.776665	0.385271	1	0.712466	0.617227	0.613924
Donor i (independent PCRs)	PRG2	22062.3	882	723.636	14569.7	23.1901	4325.79	32.6033	1505.45	0.868899	0.528425	1	0.637923	0.565639	0.541332
Donor i (independent PCRs)	PRG3	4135.86	26	44.3675	2401.73	9.09	924.544	0	730.124	0.862656	0.253824	1	0.757753	0.401676	0.398609
Donor i (independent PCRs)	PRKCD	12002.5	47	81.4751	5503.71	24.2501	4401.91	4.9739	1939.14	0.918613	0.228797	1	0.663759	0.427529	0.425531
Donor i (independent PCRs)	PTPN6	4013.12	22	917.314	627.158	3.03	2042.02	43.7575	357.84	0.901076	0.203456	1	0.490431	0.545663	0.542339
Donor i (independent PCRs)	PVR	49377.4	5604	16319.6	17823.4	458.582	7492.03	100.049	1579.79	0.237944	0.886212	1	0.781512	0.617485	0.544936
Donor i (independent PCRs)	PYCARD	28184.6	113	31.4075	12022.9	75.4268	12151.9	92.3202	3697.72	0.826946	0.070515	1	0.8159	0.447413	0.44534
Donor i (independent PCRs)	RAC1	18875.9	304	760.932	12150.1	249.36	3956.38	107.088	1348	0.858124	0.383525	1	0.807746	0.511659	0.50273
Donor i (independent PCRs)	REG1A	46811.9	2673	2251.66	26833.7	39.39	12184.1	26.7803	2803.21	0.79732	0.795254	1	0.733434	0.777328	0.730086
Donor i (independent PCRs)	REG3A	25157.5	7765	1225.49	12572.4	177.63	1713.42	251.296	1452.27	0.770727	0.680569	1	0.634509	0.686198	0.459015
Donor i (independent PCRs)	REG3G	3388.92	1560	280.735	1015.27	34.7414	116.284	0.8613	381.028	0.89958	0.515432	1	0.676532	0.61454	0.295726
Donor i (independent PCRs)	REL	9415.02	295	130.246	3756.31	27.26	3527.62	4.9289	1673.65	0.882636	0.715944	1	0.793952	0.756882	0.728021
Donor i (independent PCRs)	RELA	17520.8	65	1797.1	9162.76	0	5110.38	4.563	1380.98	0.851809	0.398013	0	0.63157	0.523032	0.520925
Donor i (independent PCRs)	RELB	22218	117	1432.68	7290.31	7.07	8708.87	61.3912	4600.7	0.916179	0.104752	1	0.605073	0.421633	0.418823
Donor i (independent PCRs)	RHOA	18887.3	25	4725.69	5166.04	14.14	6450.38	35.9054	2470.11	0.988824	0.675672	1	0.733085	0.789071	0.787867
Donor i (independent PCRs)	RIPK1	19024	1007	2128.65	7505.1	191.791	2270.18	21.2251	5900.02	0.837001	0.501253	1	0.649576	0.596085	0.550273
Donor i (independent PCRs)	RIPK2	15806	1	109.789	10331.7	0	4254.35	53.4771	1055.7	0.982579	0.310168	0	0.751147	0.442852	0.442822
Donor i (independent PCRs)	RPE65-1	8038.24	697	1077.98	3965.51	44.42	1588.16	30.485	634.681	0.849484	0.784614	1	0.499142	0.728611	0.659733
Donor i (independent PCRs)	RPE65-2	25317.8	3254	2909.98	12484.4	177.811	4972.48	62.0391	1457.04	0.874933	0.7907	1	0.537684	0.743205	0.641586
Donor i (independent PCRs)	RPE65-3	38703.5	8579	4586.03	17786.2	237.29	5893.29	97.418	1524.28	0.851732	0.810232	1	0.489321	0.752137	0.578128
Donor i (independent PCRs)	SDC1	11306.8	37	56.7509	6809.43	0	2594.9	3.0877	1805.65	0.868034	0.83721	0	0.812529	0.830626	0.82739
Donor i (independent PCRs)	SDC2	61588.9	1149	2246.44	39004.9	604.94	15488.5	123.633	2971.43	0.733277	0.724059	1	0.681576	0.715856	0.701795
Donor i (independent PCRs)	SDC4	13377	176	98.1288	7446.81	59.55	3720.91	4.6329	1871.01	0.731582	0.360357	1	0.791985	0.508747	0.500962
Donor i (independent PCRs)	SELE	20662	981	3245.93	8964.53	47.4101	5776.65	8.5587	1637.94	0.93486	0.746914	1	0.711041	0.769916	0.730196
Donor i (independent PCRs)	SELL	17009.7	22	29.6005	9691.82	5.05	5166.15	9.307	2085.76	0.882732	0.966597	1	0.801922	0.909317	0.907976
Donor i (independent PCRs)	SELP	40791.8	6167	3754.23	21165.8	345.341	7233.12	23.4579	2102.77	0.862462	0.789021	1	0.643221	0.767296	0.644916
Donor i (independent PCRs)	SFTPA1	2432.54	601	166.677	953.037	20.07	160.301	11.6027	519.857	0.808731	0.65651	1	0.588005	0.672881	0.46016
Donor i (independent PCRs)	SFTPA2	52079.7	5185	2634.46	11000.4	1433.88	851.29	245.465	30729.1	0.877857	0.108538	1	0.607838	0.342836	0.25861
Donor i (independent PCRs)	SIGLEC1	53952.2	978	1518.43	21997.1	8.08	27571.8	15.5048	1863.3	0.871688	0.891402	1	0.696582	0.785706	0.770949
Donor i (independent PCRs)	SIGLEC10	45106.3	104	212.518	23482.1	49.4801	14841.8	49.2458	6367.18	0.823378	0.728906	1	0.657216	0.702199	0.700311
Donor i (independent PCRs)	SIGLEC11	51061.1	43357	5812.24	813.947	267.62	16.1511	129.715	664.476	0.862826	0.318865	1	0.677174	0.80363	0.110471
Donor i (independent PCRs)	SIGLEC14	13037.7	393	2282.92	4538.06	170.61	3126.32	19.235	2507.53	0.651517	0.884599	1	0.785322	0.803279	0.773244
Donor i (independent PCRs)	SIGLEC15	37522.7	229	505.631	16532	3.0401	18499.6	58.3724	1695.04	0.925231	0.520925	1	0.866991	0.706854	0.702329
Donor i (independent PCRs)	SIGLEC5	8301.1	1674	882.28	3086.82	118.332	1365.55	24.4794	1149.64	0.820004	0.706182	1	0.558229	0.693924	0.530933
Donor i (independent PCRs)	SIGLEC7	11531.1	27	445.271	3097.29	0	6556.48	136.552	1268.51	0.208361	0.931906	0	0.735446	0.77246	0.7704
Donor i (independent PCRs)	SIGLEC8	7838.92	91	162.167	1855.9	4.04	2608.55	282.342	2834.92	0.336771	0.584562	1	0.621438	0.59702	0.585514
Donor i (independent PCRs)	SIGLEC9	28870	86	11.929	9649	2.02	16397	125.927	2598.2	0.816221	0.948628	1	0.721674	0.805771	0.803121
Donor i (independent PCRs)	SIGLECL1	5732.85	35	56.0552	2627.46	0	1905.88	0.4378	1108.02	0.831951	0.839215	0	0.646449	0.759075	0.753329
Donor i (independent PCRs)	SIRPA	25605.6	452	410.095	16861.4	89.8601	5548.43	121.863	2122	0.721712	0.779159	1	0.569396	0.728195	0.714106
Donor i (independent PCRs)	SIRPB1	23436.7	647	2401.55	14812.2	141.39	3639.09	95.2573	1700.29	0.880842	0.86597	1	0.608584	0.823959	0.799325
Donor i (independent PCRs)	SOCS3	2810.9	27	5.8726	876.264	0	897.856	3.8753	1000.03	0.836359	0.389782	0	0.566685	0.480488	0.473308
Donor i (independent PCRs)	SRC	19342.6	176	1891.26	9979.68	40.39	4424.01	13.9267	2817.31	0.953186	0.721167	1	0.819366	0.775314	0.767049
Donor i (independent PCRs)	STAT2	39624.5	58	16274.7	11074.5	49.46	8823.29	47.4531	3297.06	0.997861	0.820191	1	0.79475	0.894067	0.892638
Donor i (independent PCRs)	SYK	18388.2	828	1290.94	6547.05	90.9507	8062.03	44.8694	1524.37	0.87116	0.33052	1	0.799919	0.614626	0.584368
Donor i (independent PCRs)	TAB1	58045.9	19319	10729.1	21762.1	374.731	4150.99	100.386	1609.66	0.896568	0.269146	1	0.812366	0.519314	0.341228
Donor i (independent PCRs)	TAS2R9-3	76049.6	13972	15122.8	37382	1847.76	5860.17	232.695	1632.19	0.930857	0.909079	1	0.711575	0.898117	0.728965
Donor i (independent PCRs)	TAS2R9-4	70036.3	17080	10949.2	34277.4	1503.21	4926.5	56.5579	1243.49	0.92113	0.929579	1	0.756923	0.913371	0.686411
Donor i (independent PCRs)	TBK1	3091.98	0	6.5867	1598.56	1.01	905.908	1.702	578.209	1	0.49406	1	0.735035	0.582491	0.582491
Donor i (independent PCRs)	TICAM1	39990.2	3747	8956.87	20796.4	962.734	4248.48	203.253	1075.41	0.869339	0.233513	1	0.650173	0.468125	0.422814
Donor i (independent PCRs)	TICAM2	11288.3	63	126.429	5634.44	2.02	3991.32	11.0796	1460.05	0.693706	0.811182	1	0.745887	0.78298	0.777956
Donor i (independent PCRs)	TIRAP	5843.84	83	190.383	2575.2	16.16	1883.59	16.2364	1079.27	0.846164	0.942102	1	0.393264	0.716799	0.704269
Donor i (independent PCRs)	TLR10	1402.94	46	307.446	464.015	15.15	501.476	1.5297	67.3225	0.60247	0.904577	1	0.67073	0.74255	0.716947
Donor i (independent PCRs)	TLR3	33222.2	494	6093.95	12980.7	87.9006	10407.8	20.8018	3137.04	0.94179	0.402254	1	0.546748	0.566078	0.556776
Donor i (independent PCRs)	TLR5	4112.48	40	79.3588	2091	6.1004	1636.03	11.2325	248.753	0.788729	0.328172	1	0.622638	0.465196	0.460366
Donor i (independent PCRs)	TLR6	53755.2	2000	834.122	39805.2	240.007	7961.09	305.796	2609.03	0.861618	0.668709	1	0.686525	0.676535	0.649921
Donor i (independent PCRs)	TLR7	44819.6	2672	1266.73	27999	229.391	10549.3	40.9461	2062.27	0.804908	0.485864	1	0.466721	0.493858	0.462966
Donor i (independent PCRs)	TLR8	4984.77	43	914.153	1506.14	4.04	1125.44	9.2414	1382.75	0.435723	0.276292	1	0.706535	0.45458	0.449139
Donor i (independent PCRs)	TLR9	7030.68	54	154.227	3756.57	11.11	1541.05	10.0788	1503.64	0.895172	0.653705	1	0.574506	0.638885	0.632631
Donor i (independent PCRs)	TNF-1	26638.3	332	1046.77	11466.1	89.8704	10032.3	56.0231	3615.23	0.22951	0.227013	1	0.806873	0.487203	0.48016
Donor i (independent PCRs)	TNF-2	38642.3	393	1967.81	18273.6	57.5801	13499.2	66.1174	4384.94	0.320463	0.219791	1	0.807154	0.461578	0.456272
Donor i (independent PCRs)	TNF-3	32770.8	270	3488.04	13299.1	124.2	11977.4	31.9837	3580.02	0.224376	0.239909	1	0.825705	0.484175	0.479692
Donor i (independent PCRs)	TNF-4	9445.01	127	1013.5	3633.95	33.3402	3578.28	7.724	1051.21	0.210485	0.231435	1	0.81789	0.486051	0.47869
Donor i (independent PCRs)	TNFAIP3	32733.2	149	10976.6	8250.3	120.072	11767.7	51.5899	1417.96	0.869329	0.464386	1	0.583365	0.654306	0.651188
Donor i (independent PCRs)	TREM1	66437.3	3582	8236.97	31522.1	177.912	21009.7	96.1852	1812.47	0.492405	0.950922	1	0.685682	0.797663	0.753384
Donor i (independent PCRs)	TREM2	32768.2	587	227.245	19187.1	74.74	10911.5	34.15	1746.47	0.713438	0.948166	1	0.354927	0.733611	0.719714
Donor i (independent PCRs)	TRHR-1	51132.6	24951	7264.05	12828.1	2428.61	1777.99	0	1882.79	0.882989	0.351437	1	0.437517	0.581464	0.286882
Donor i (independent PCRs)	TRHR-3	71865.6	44114	8841.17	12688.7	3283.01	1215.86	348.649	1374.21	0.930964	0.332855	1	0.726731	0.638561	0.236959
Donor i (independent PCRs)	TYROBP	3321.13	80	331.324	1018.55	24.2501	1477.99	2.6455	386.361	0.850352	0.924323	1	0.440672	0.665741	0.647577
Donor i (independent PCRs)	U2AF2-1	22574.7	1375	3684.2	9007.42	40.39	4497.13	146.284	3824.26	0.985653	0.788968	1	0.74354	0.819664	0.759084
Donor i (independent PCRs)	U2AF2-2	30907.8	4756	6162.33	10941.4	119.13	6233.81	106.378	2588.75	0.936631	0.818383	1	0.756058	0.833807	0.693247
Donor i (independent PCRs)	U2AF2-3	31882.2	4570	5099.52	12265.1	176.69	5628.65	84.2687	4057.96	0.947599	0.722805	1	0.724063	0.7747	0.647073
Donor i (independent PCRs)	U2AF2-4	38560.9	1606	6168.09	16864.9	40.4001	9155.54	93.432	4632.52	0.944532	0.818022	1	0.747539	0.822439	0.783402
Donor i (independent PCRs)	UBE2N	7865.25	486	4720.74	17.1279	29.27	489.05	9.4881	2113.57	0.209421	0.969728	1	0.654362	0.257699	0.235889
Donor i (independent PCRs)	VAV1	10024.6	61	1273.19	5432.84	0	2064.68	2.1248	1190.75	0.670973	0.423352	0	0.662087	0.515497	0.511937
Donor i (independent PCRs)	VCAN	36779.9	2384	3113.05	19194.4	288.063	7909.97	14.3065	3876.16	0.743368	0.558425	1	0.647865	0.604659	0.560831
Donor i (independent PCRs)	VSIR	32710.9	2181	5266.99	11900.2	73.7101	10805.7	122.944	2360.26	0.935999	0.935382	1	0.565793	0.793274	0.736037
Donor i (independent PCRs)	ZFP36	4572.02	5	5.9014	1289.04	0	2165.73	5.2782	1101.07	1	0.68085	0	0.803112	0.757907	0.756813
