# Supplementary figures and images for: CRISPR-based functional genomics in human dendritic cells
Source: eLife journal article supplement (doi:10.7554/elife.65856), 2021-04-27

**a**

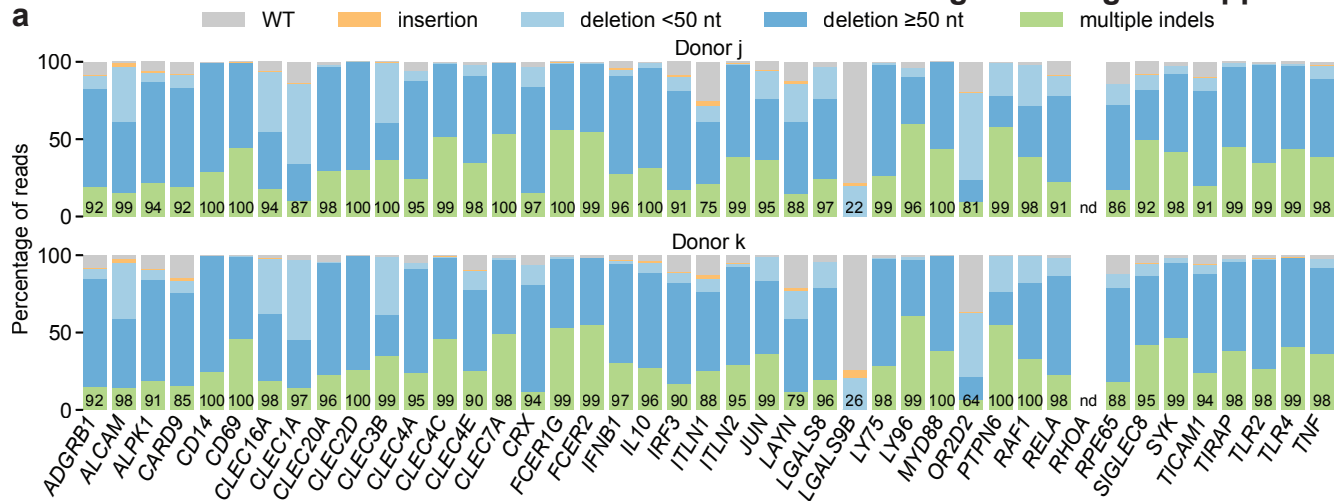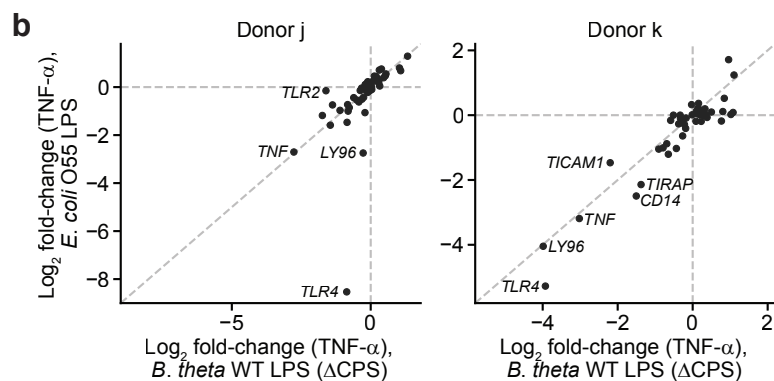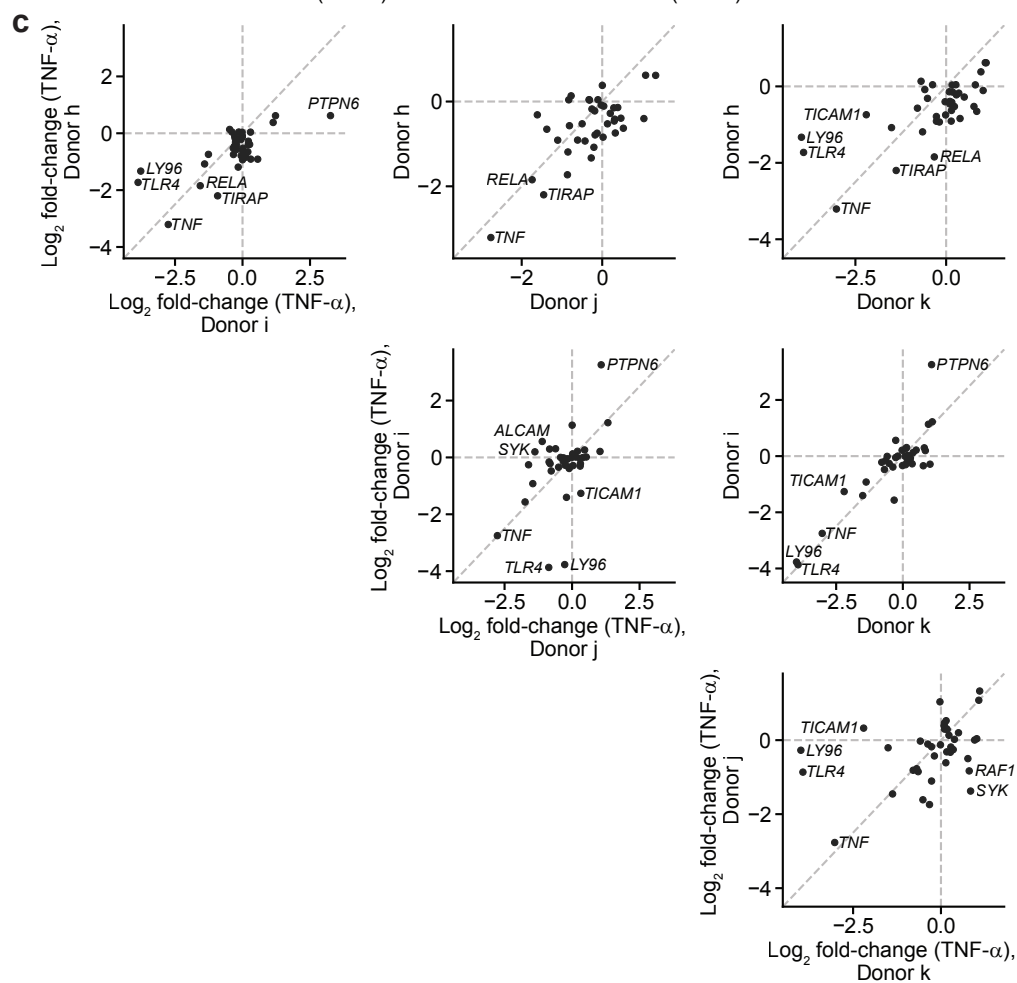

Supplement: supp [file elife-65856-supp-v1.zip]

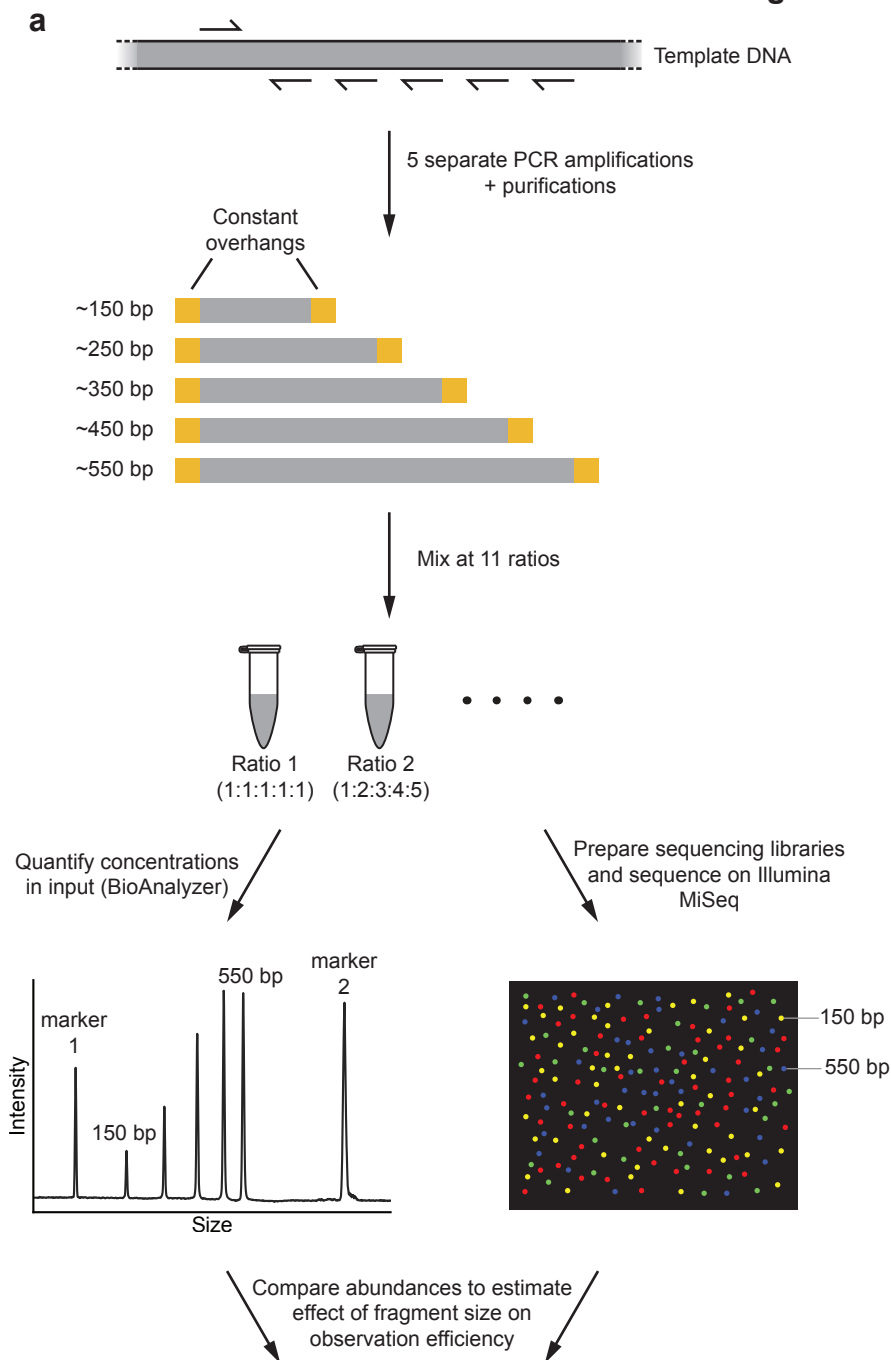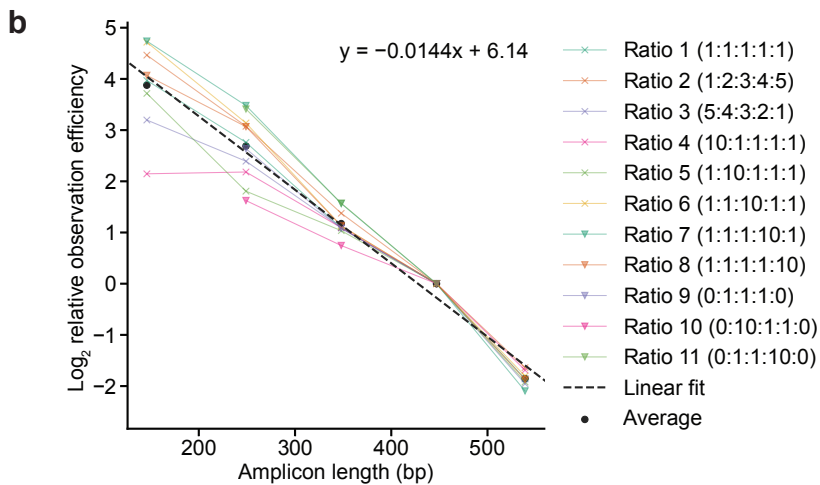

Supplement: supp [file elife-65856-supp-v1.zip]

Figure 1 - Figure Supplement 1

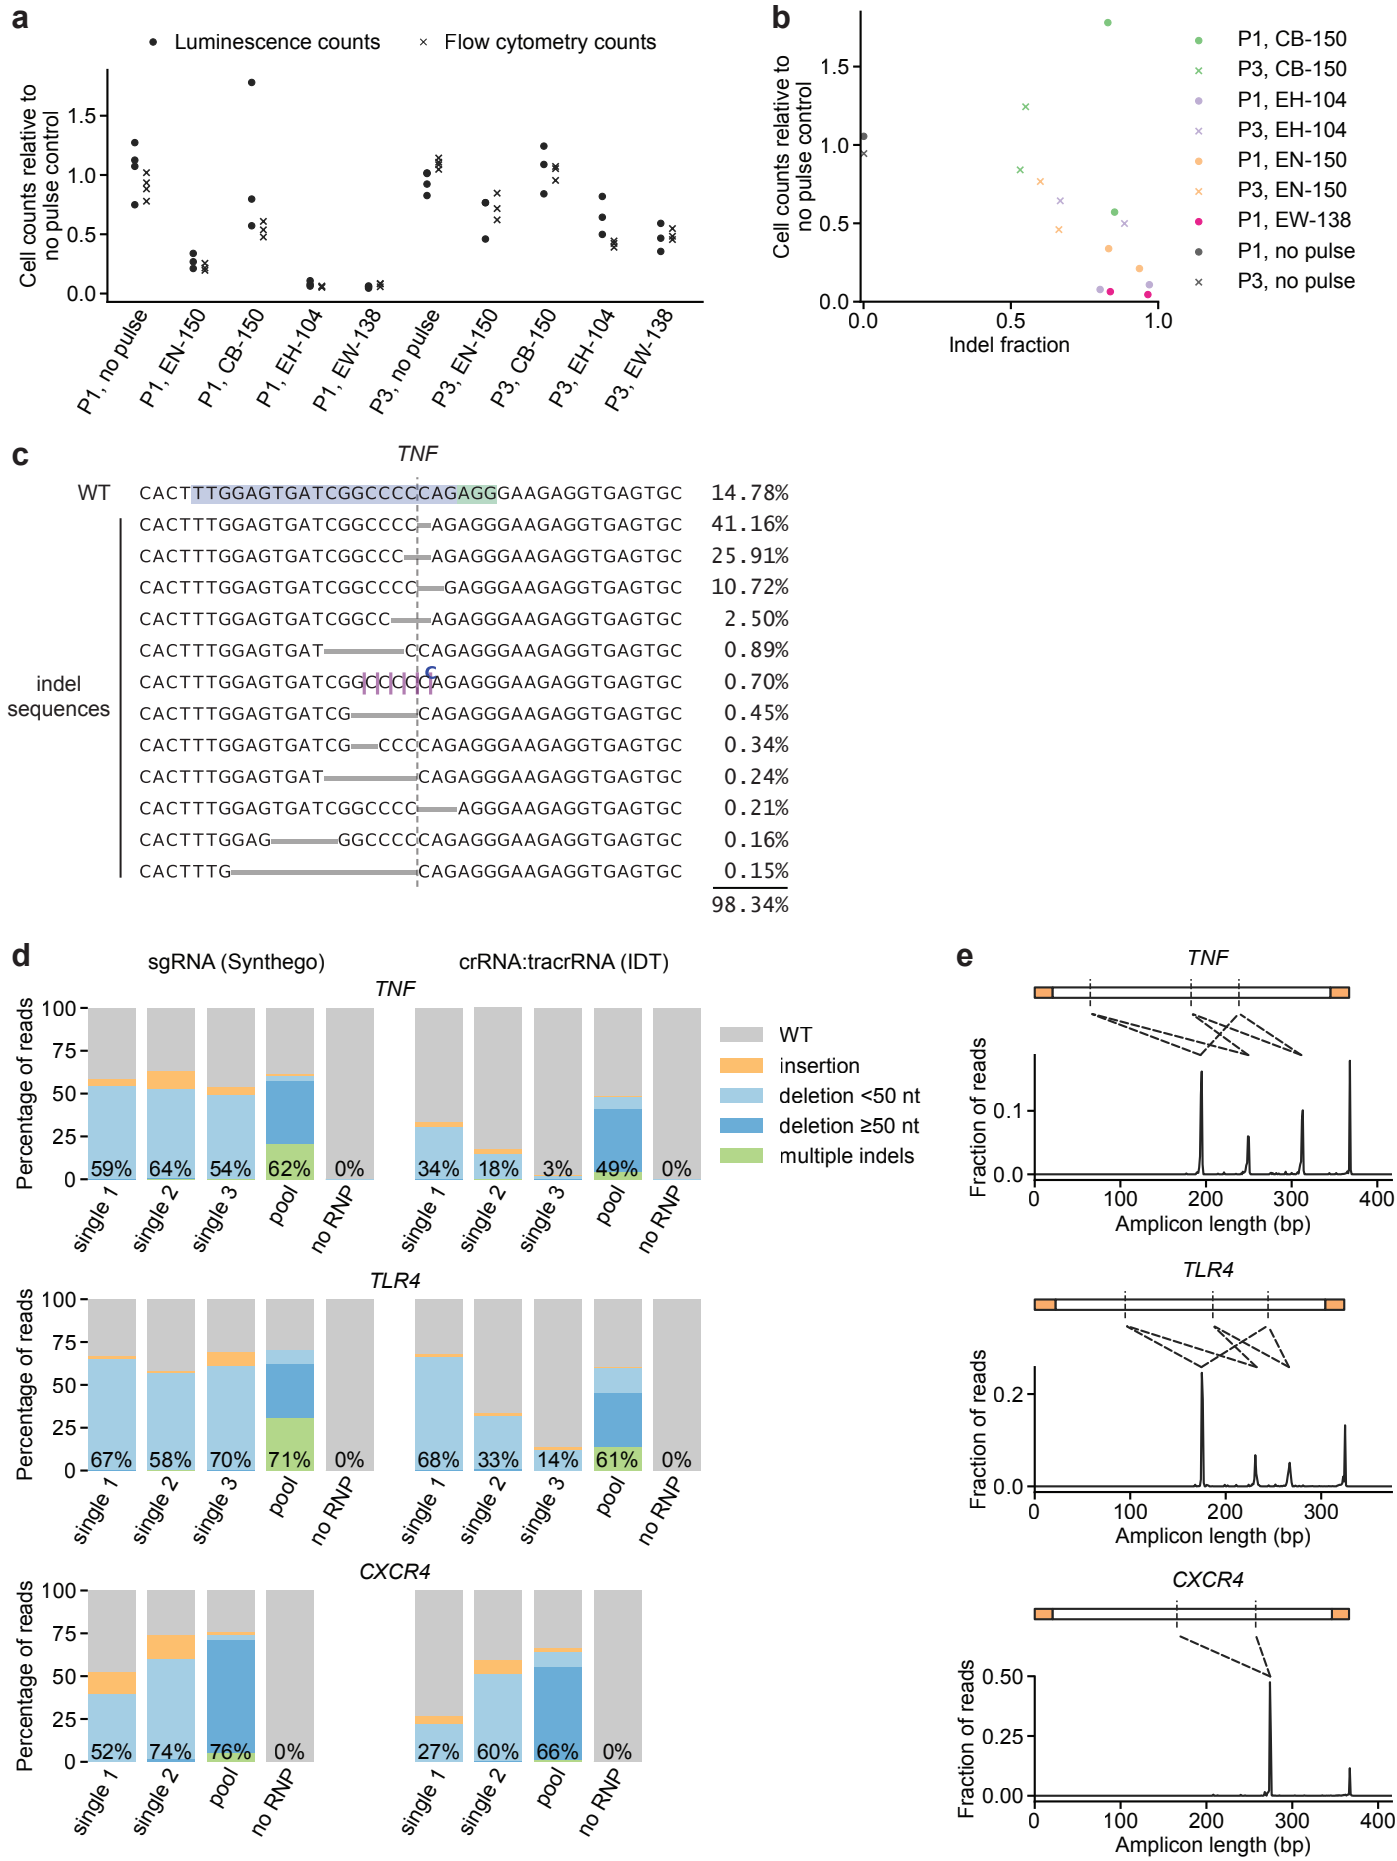

Supplement: supp [file elife-65856-supp-v1.zip › elife_poa_e65856_Figure_1_figure_supplement_1.pdf]

**Figure 1 - Figure Supplement 3**

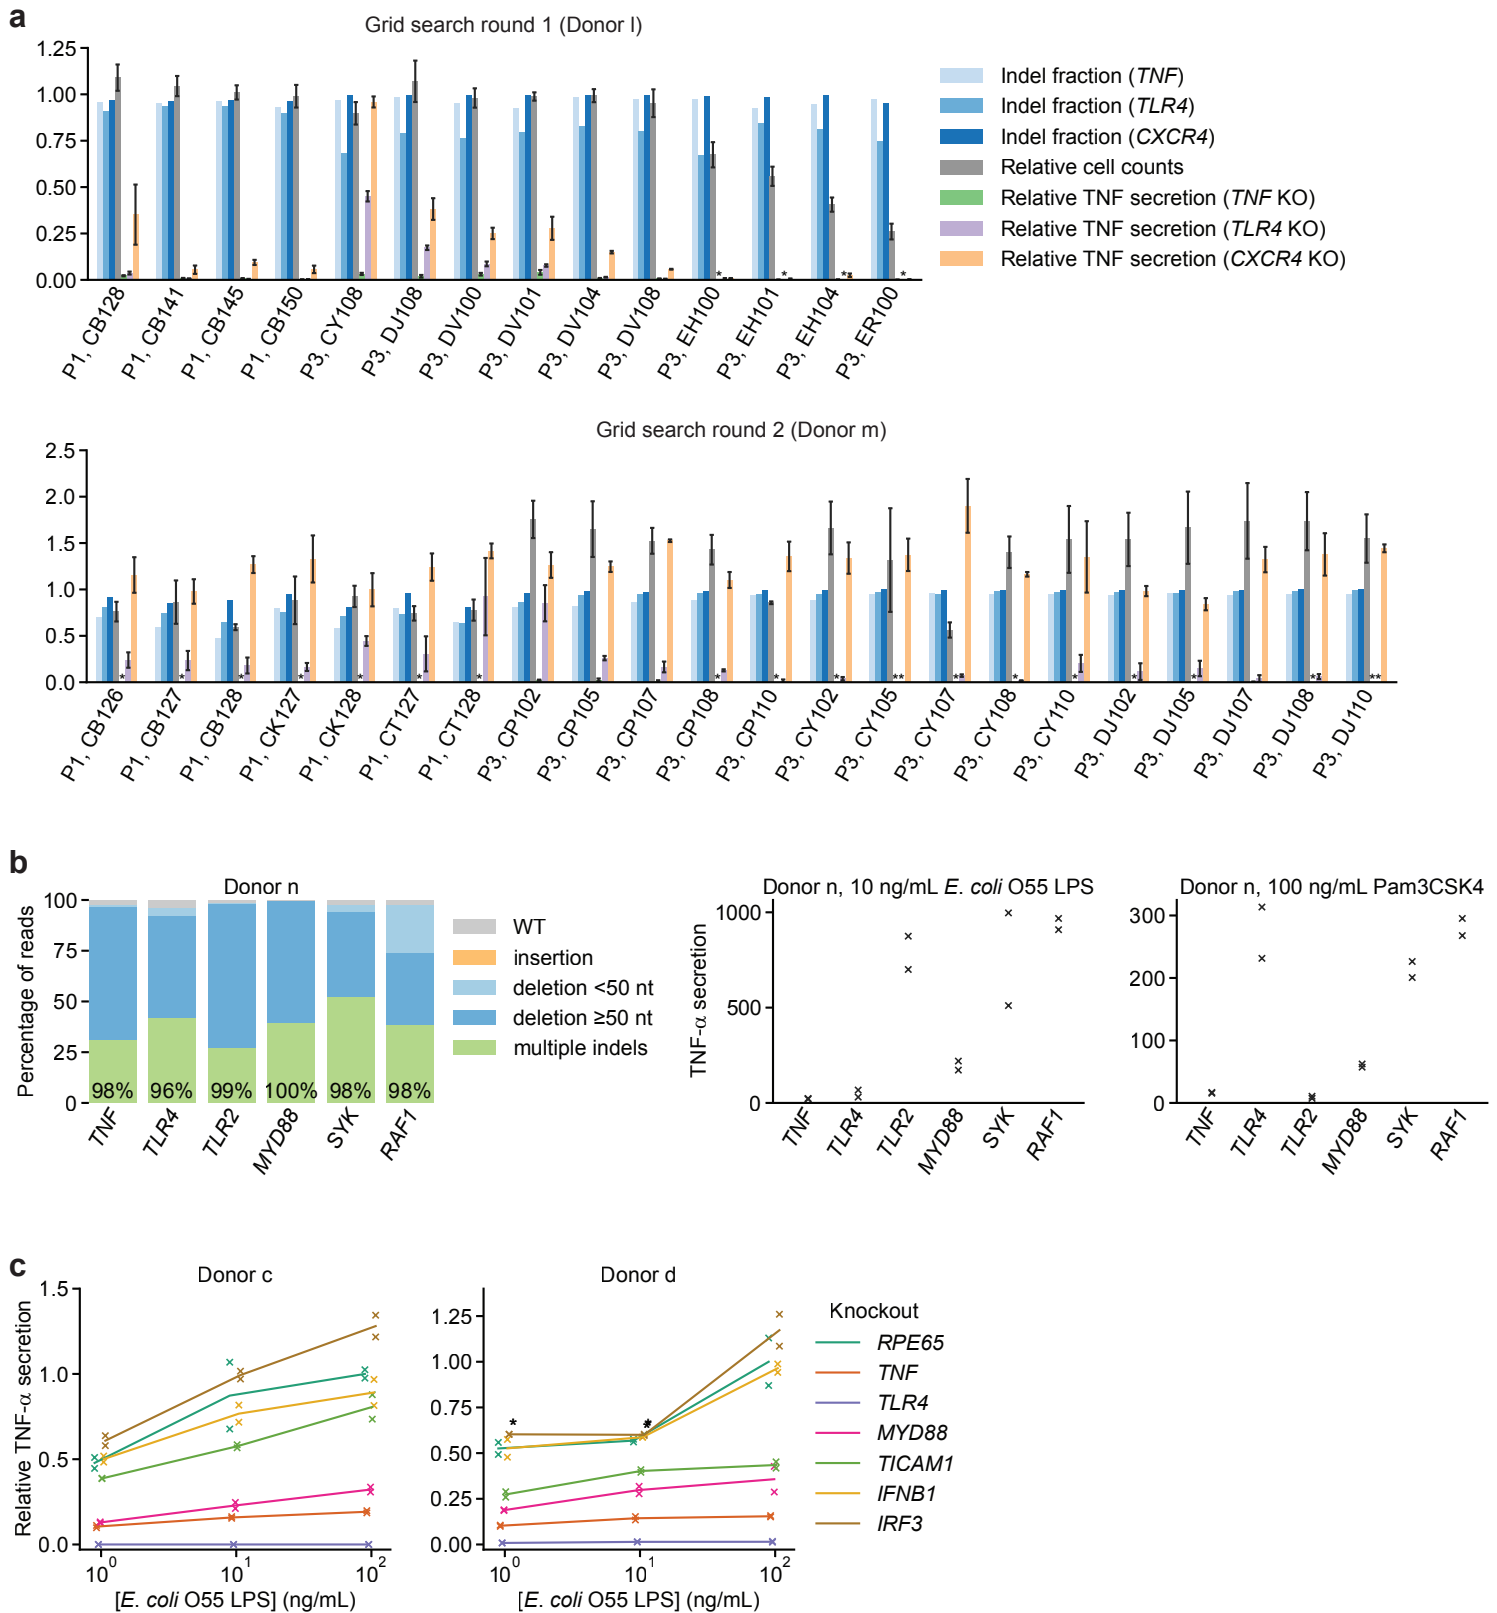

Supplement: supp [file elife-65856-supp-v1.zip › elife_poa_e65856_Figure_1_figure_supplement_3.pdf]

**Figure 1 - Figure Supplement 4**

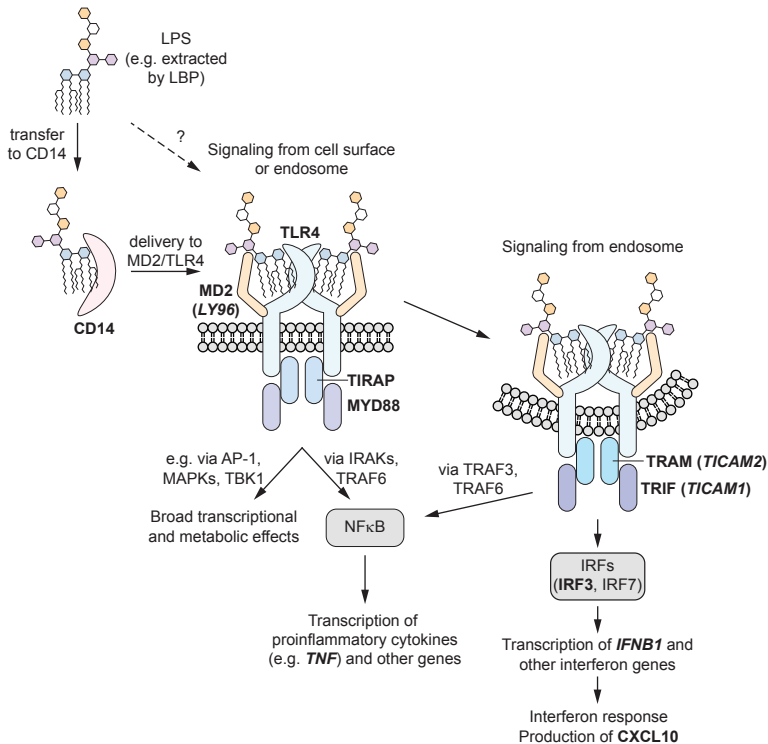

Supplement: supp [file elife-65856-supp-v1.zip › elife_poa_e65856_Figure_1_figure_supplement_4.pdf]

**Figure 1 - Figure Supplement 5**

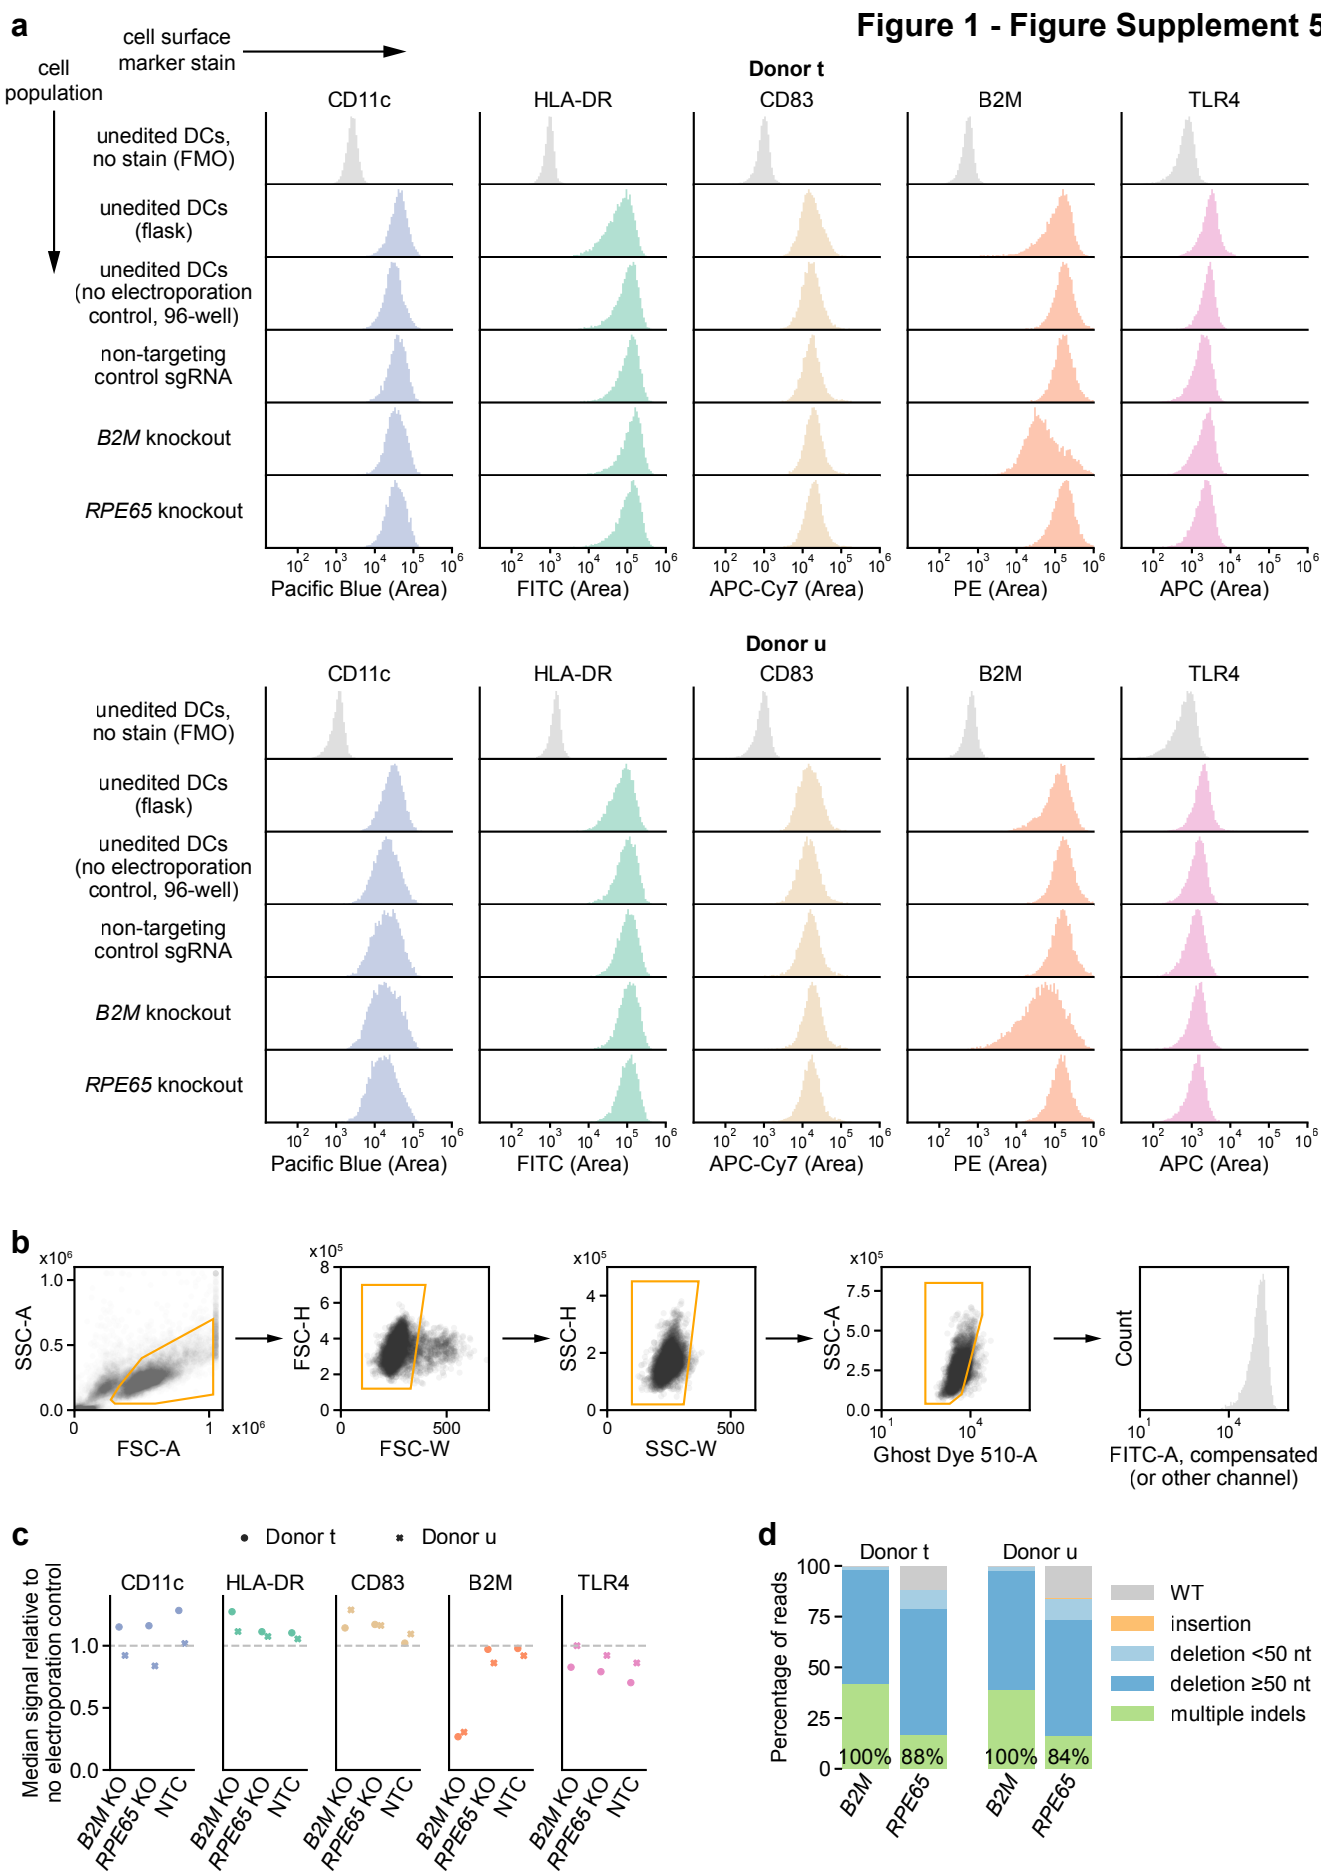

Supplement: supp [file elife-65856-supp-v1.zip › elife_poa_e65856_Figure_1_figure_supplement_5.pdf]

**Figure 2 - Figure Supplement 1**

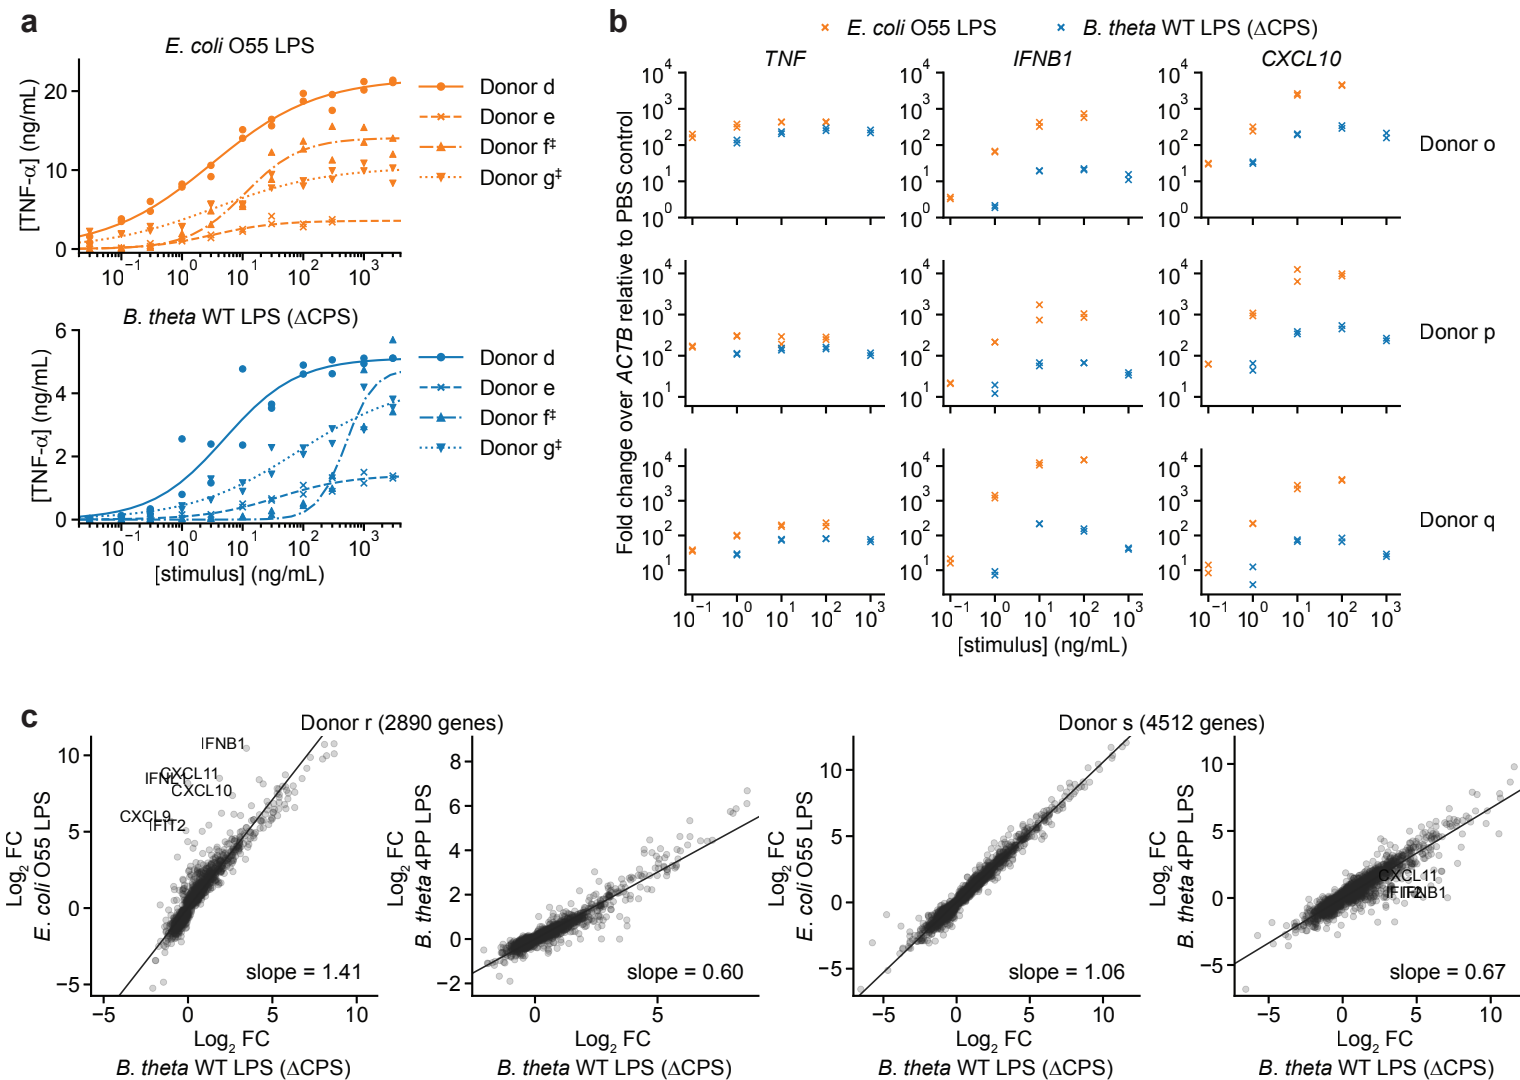

Supplement: supp [file elife-65856-supp-v1.zip › elife_poa_e65856_Figure_2_figure_supplement_1.pdf]

**Figure 2 - Figure Supplement 2**

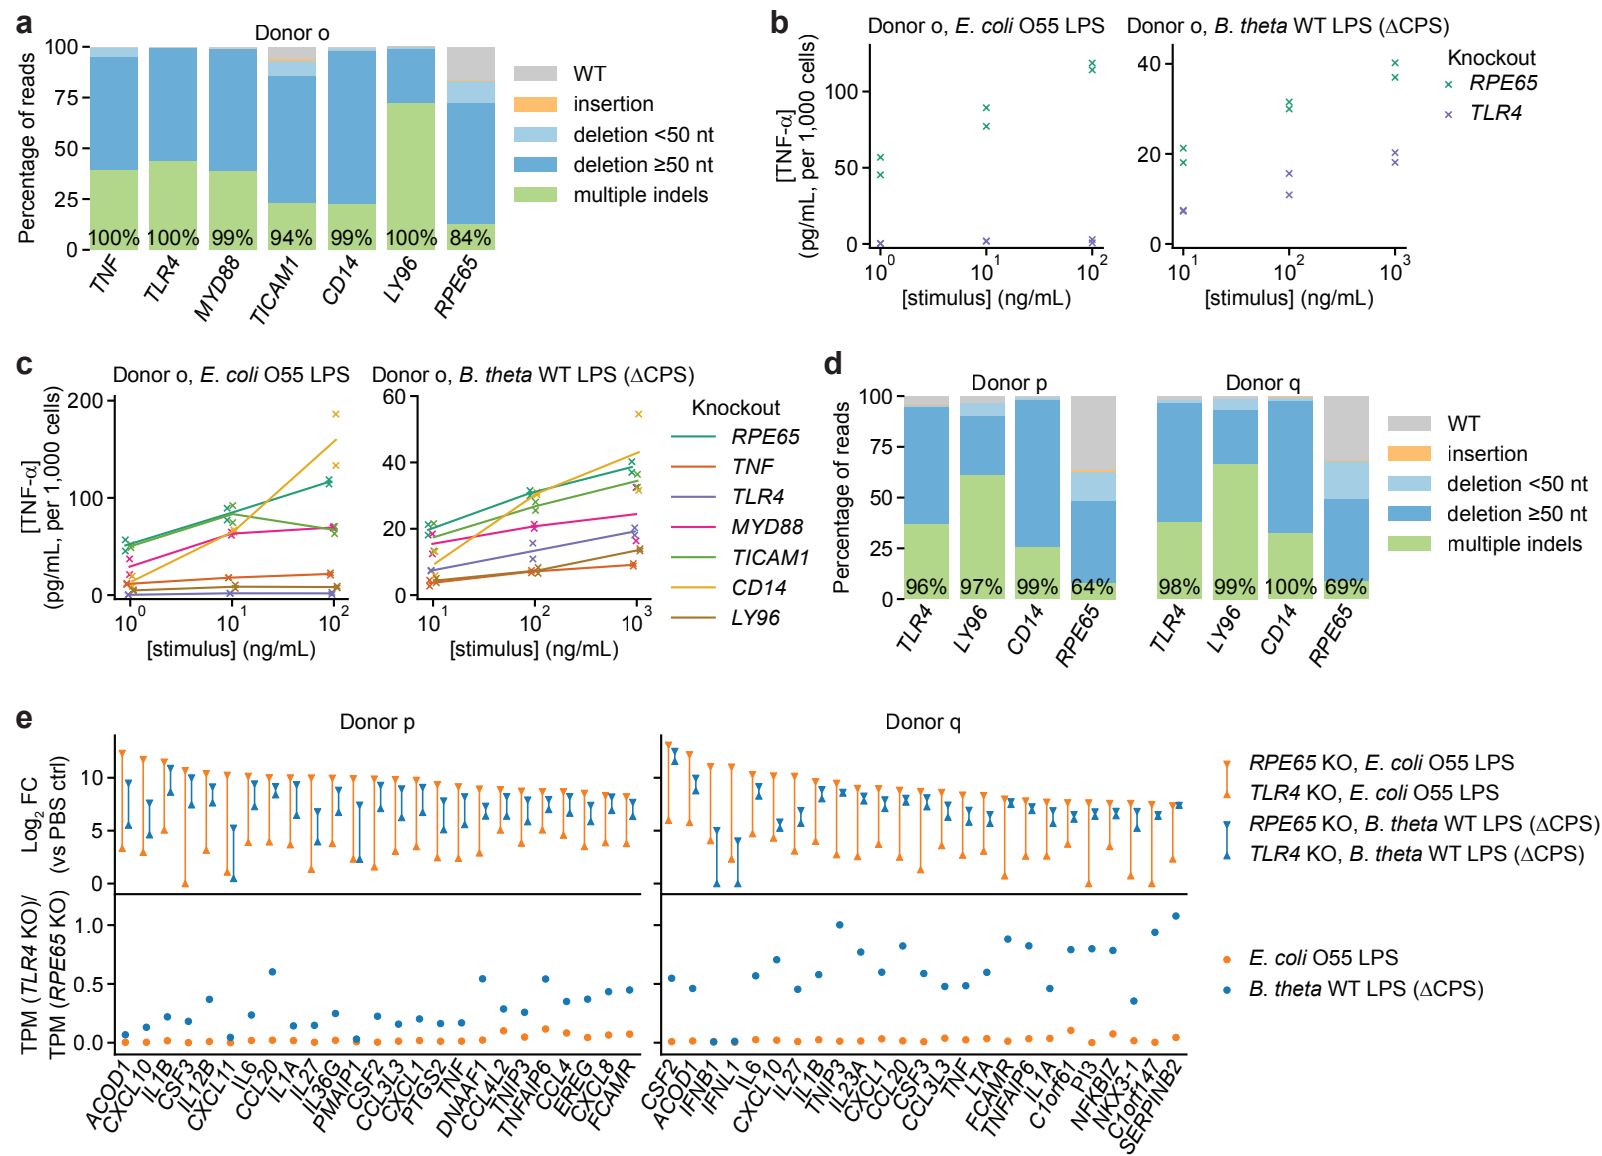

Supplement: supp [file elife-65856-supp-v1.zip › elife_poa_e65856_Figure_2_figure_supplement_2.pdf]

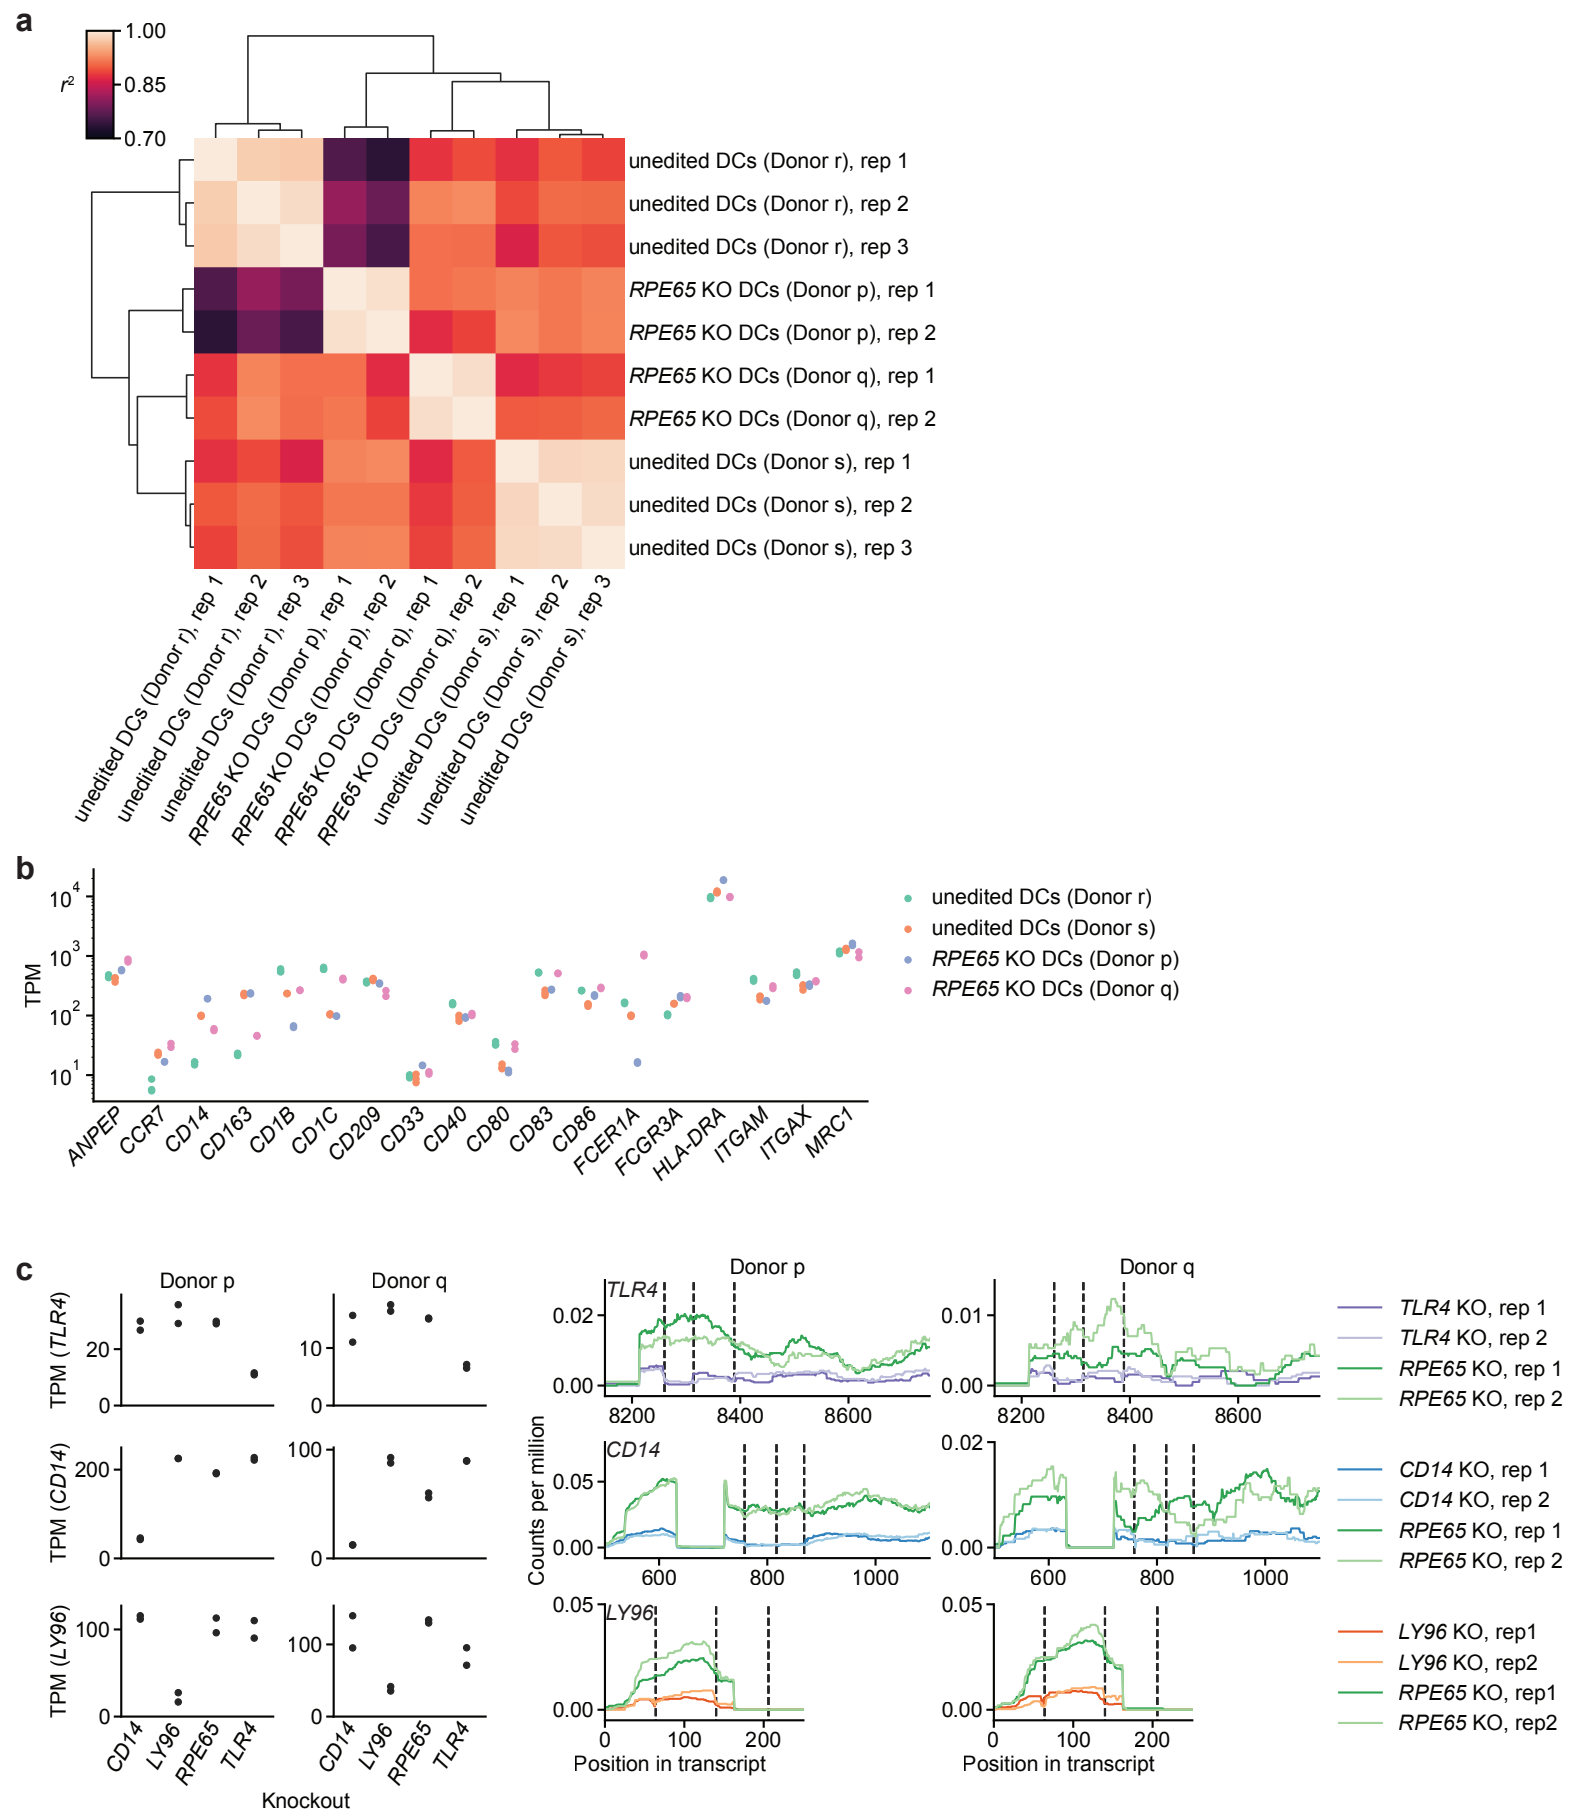

Supplement: supp [file elife-65856-supp-v1.zip › elife_poa_e65856_Figure_2_figure_supplement_3.pdf]

Figure 3 - Figure Supplement 2

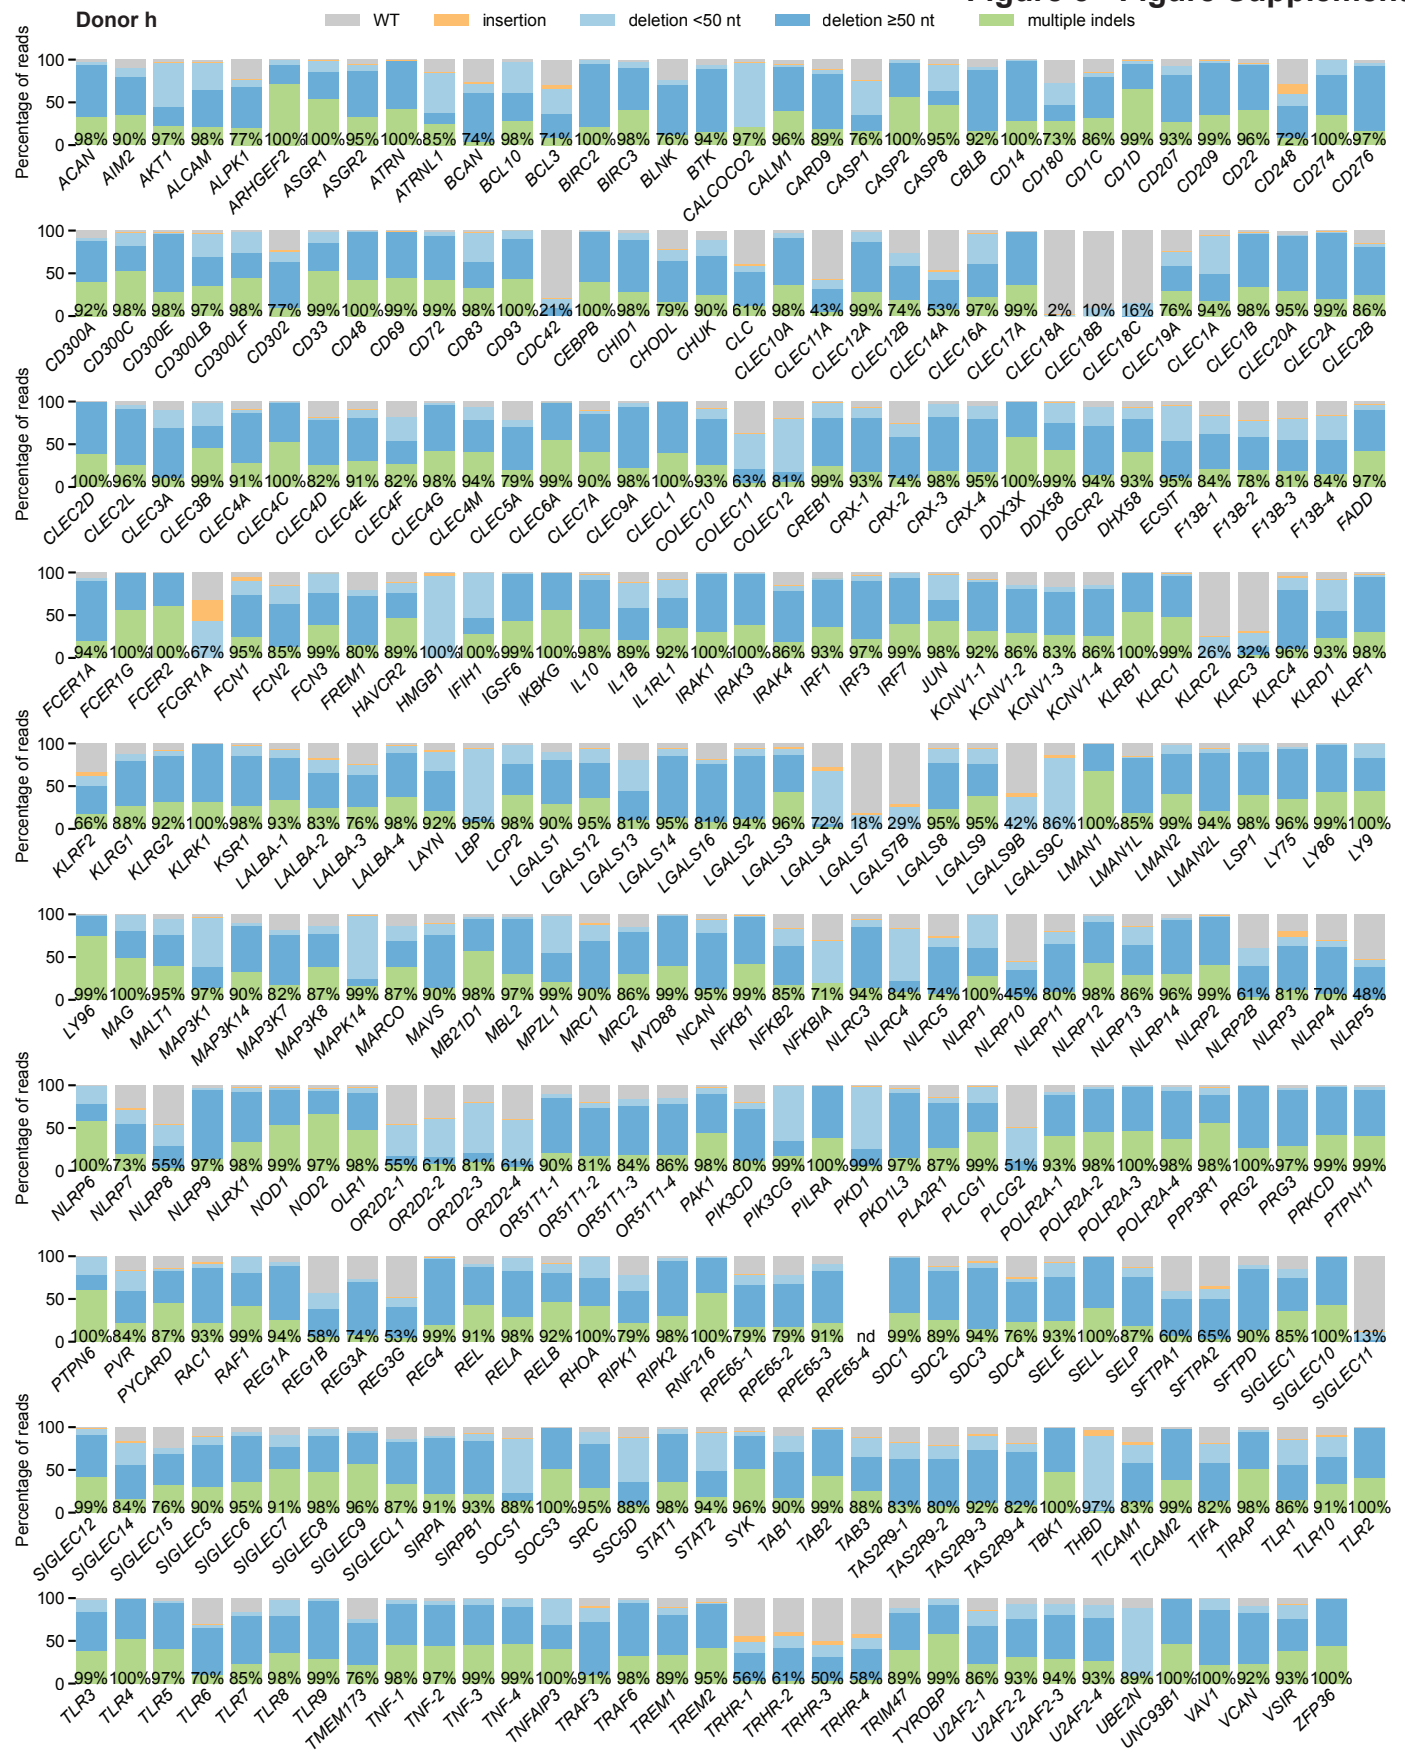

Supplement: supp [file elife-65856-supp-v1.zip › elife_poa_e65856_Figure_3_figure_supplement_2.pdf]

### Figure 3 - Figure Supplement 3

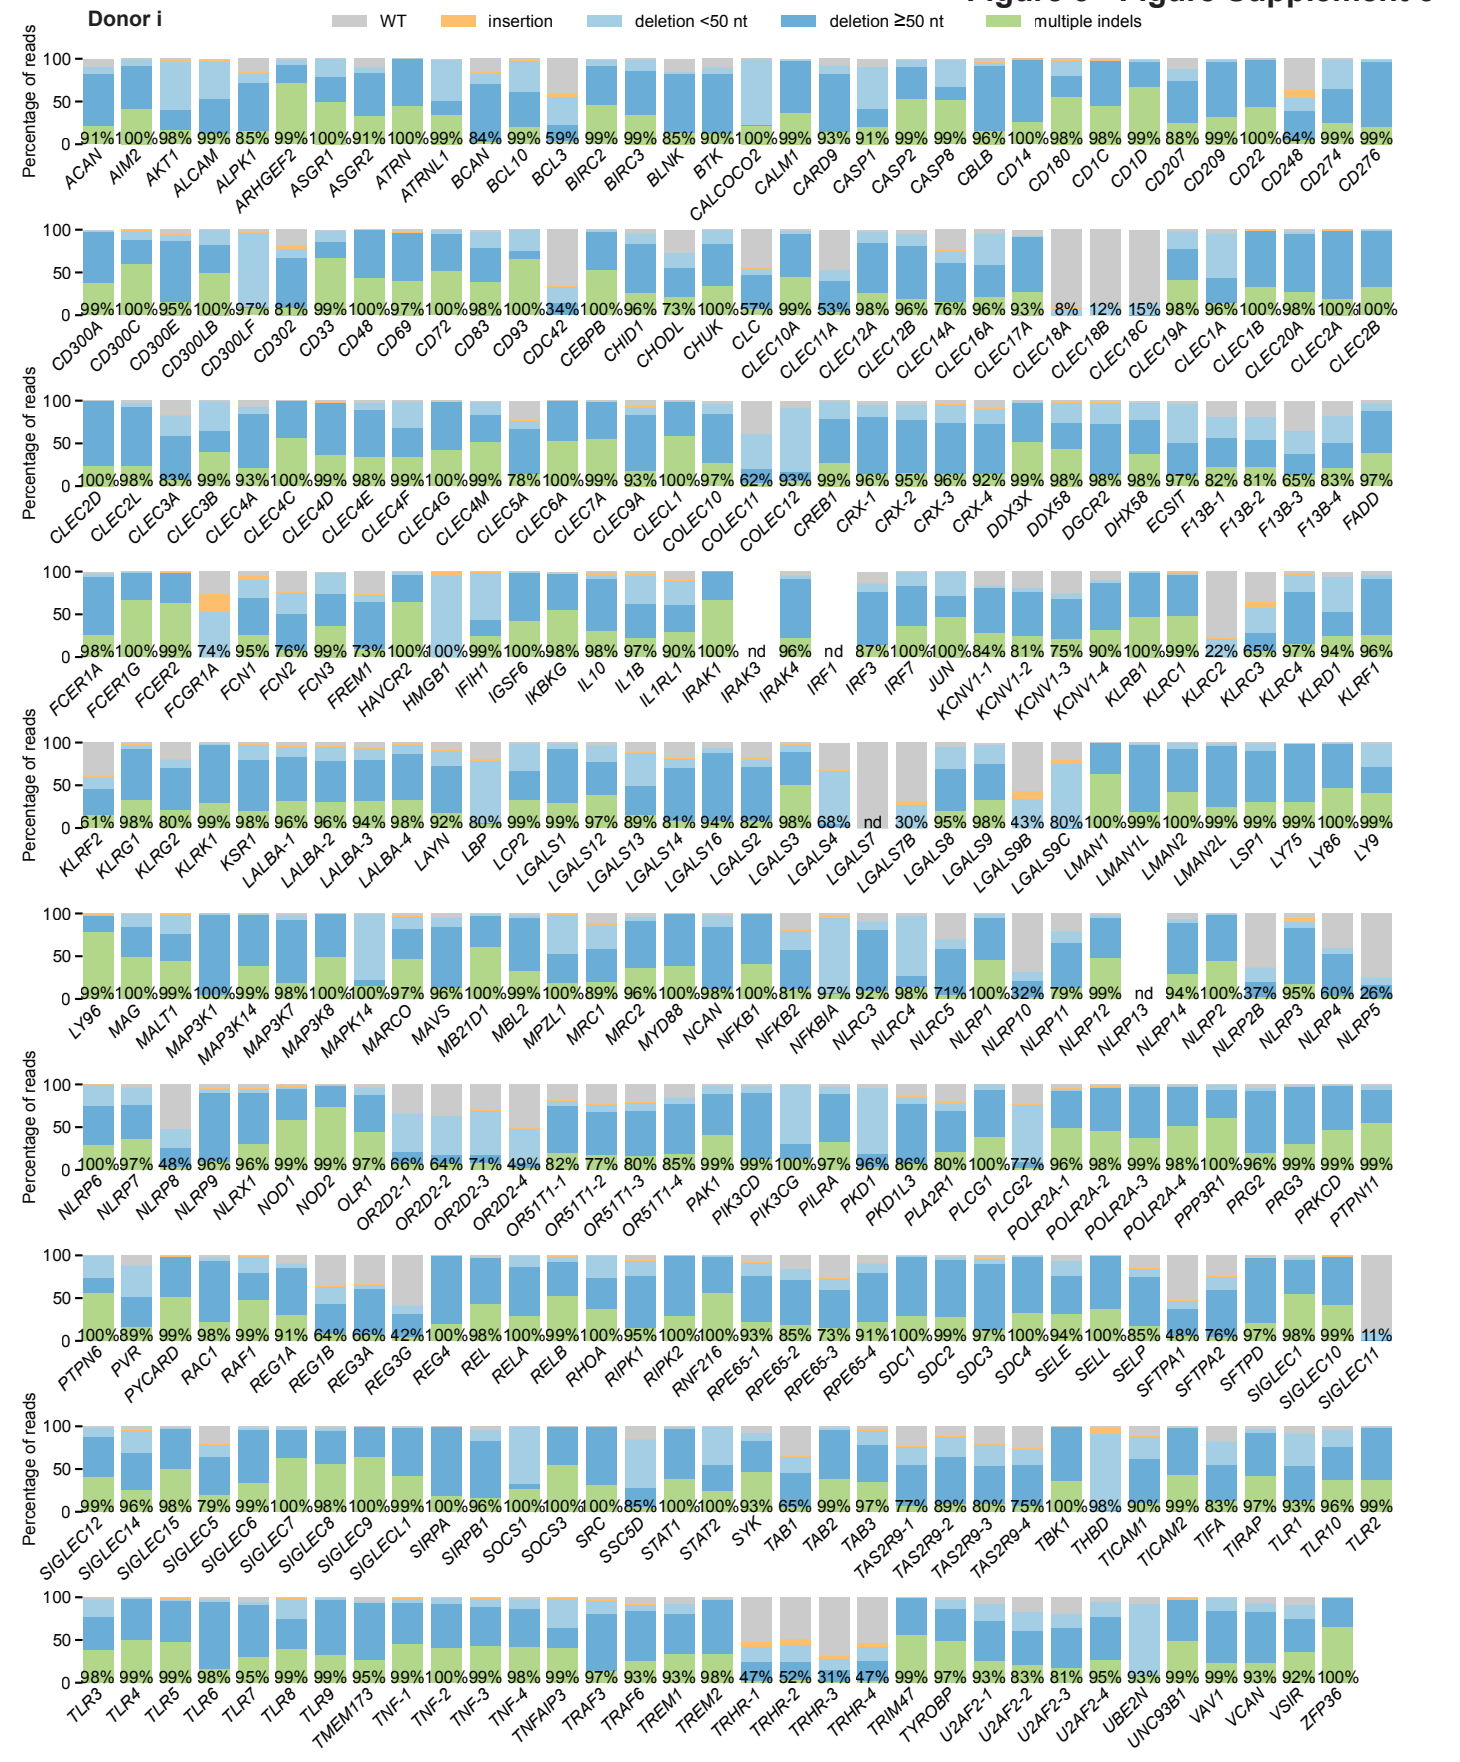

Supplement: supp [file elife-65856-supp-v1.zip › elife_poa_e65856_Figure_3_figure_supplement_3.pdf]

**Figure 3 - Figure Supplement 4**

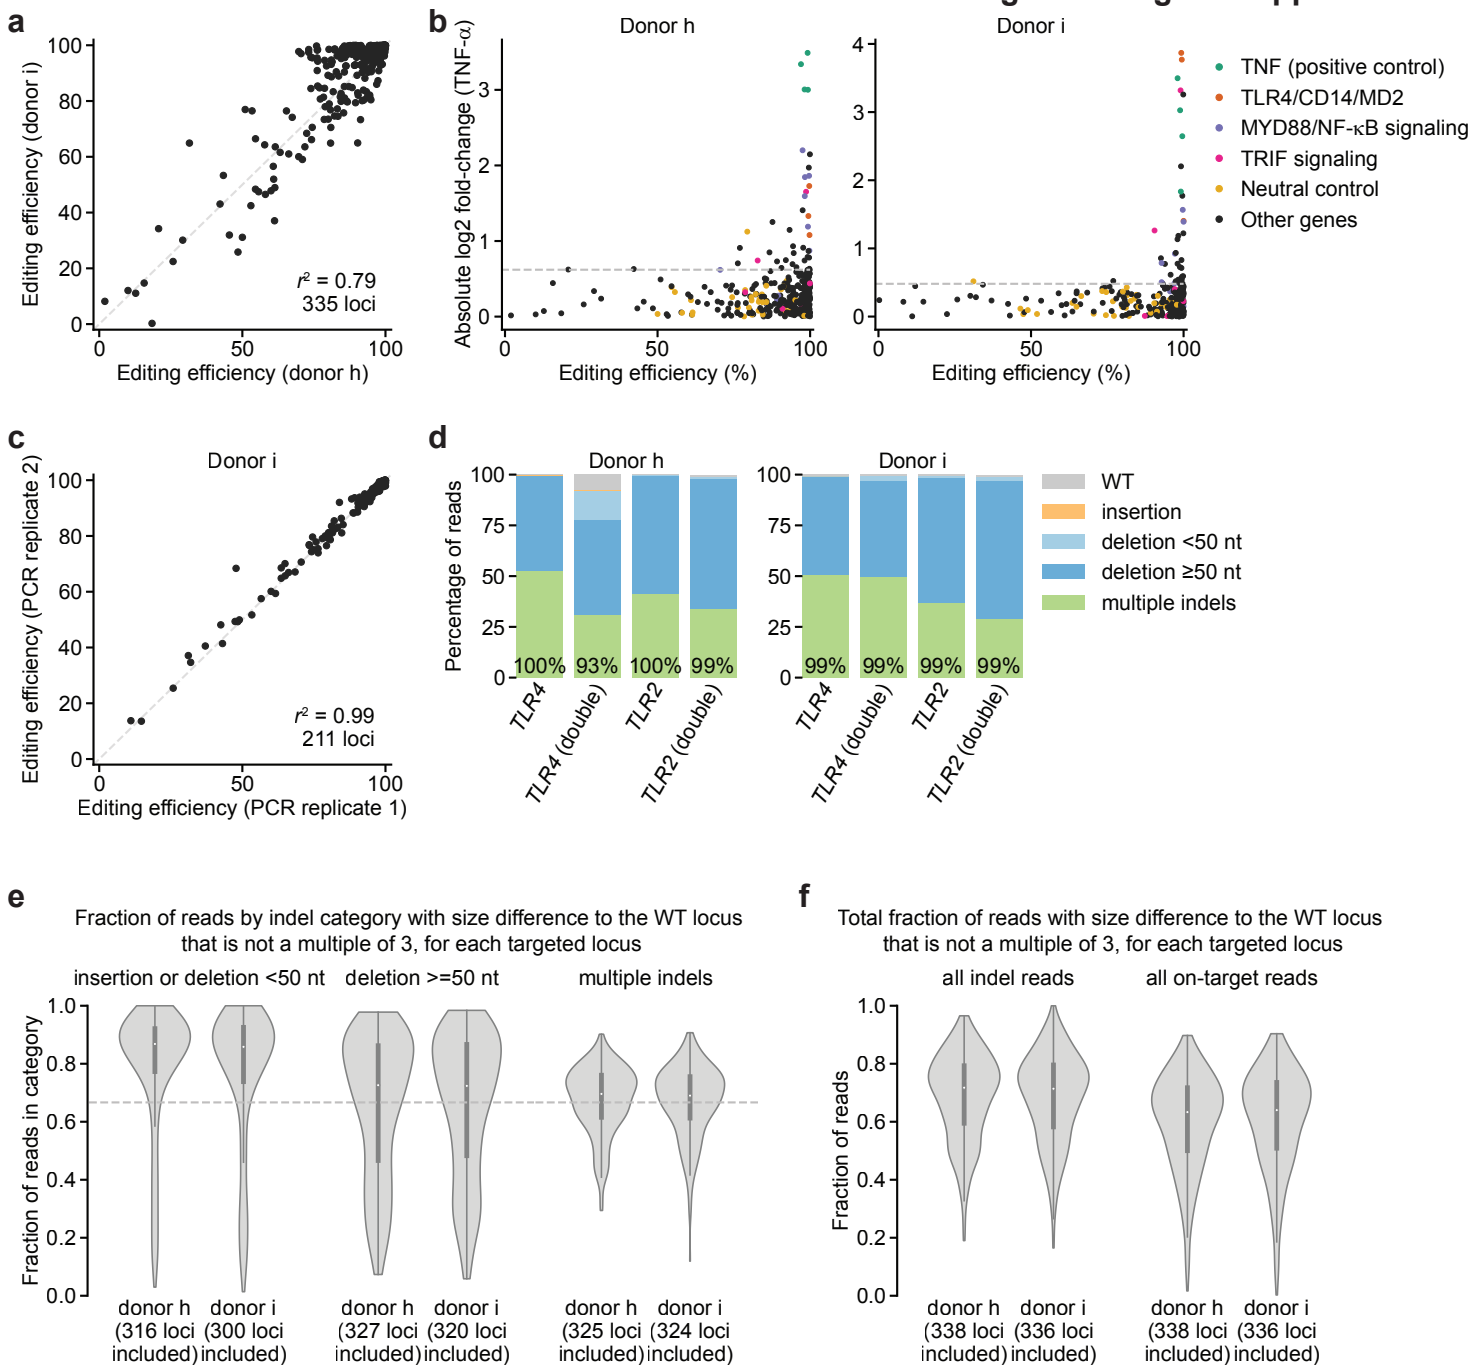

Supplement: supp [file elife-65856-supp-v1.zip › elife_poa_e65856_Figure_3_figure_supplement_4.pdf]

Figure 3 - Figure Supplement 5

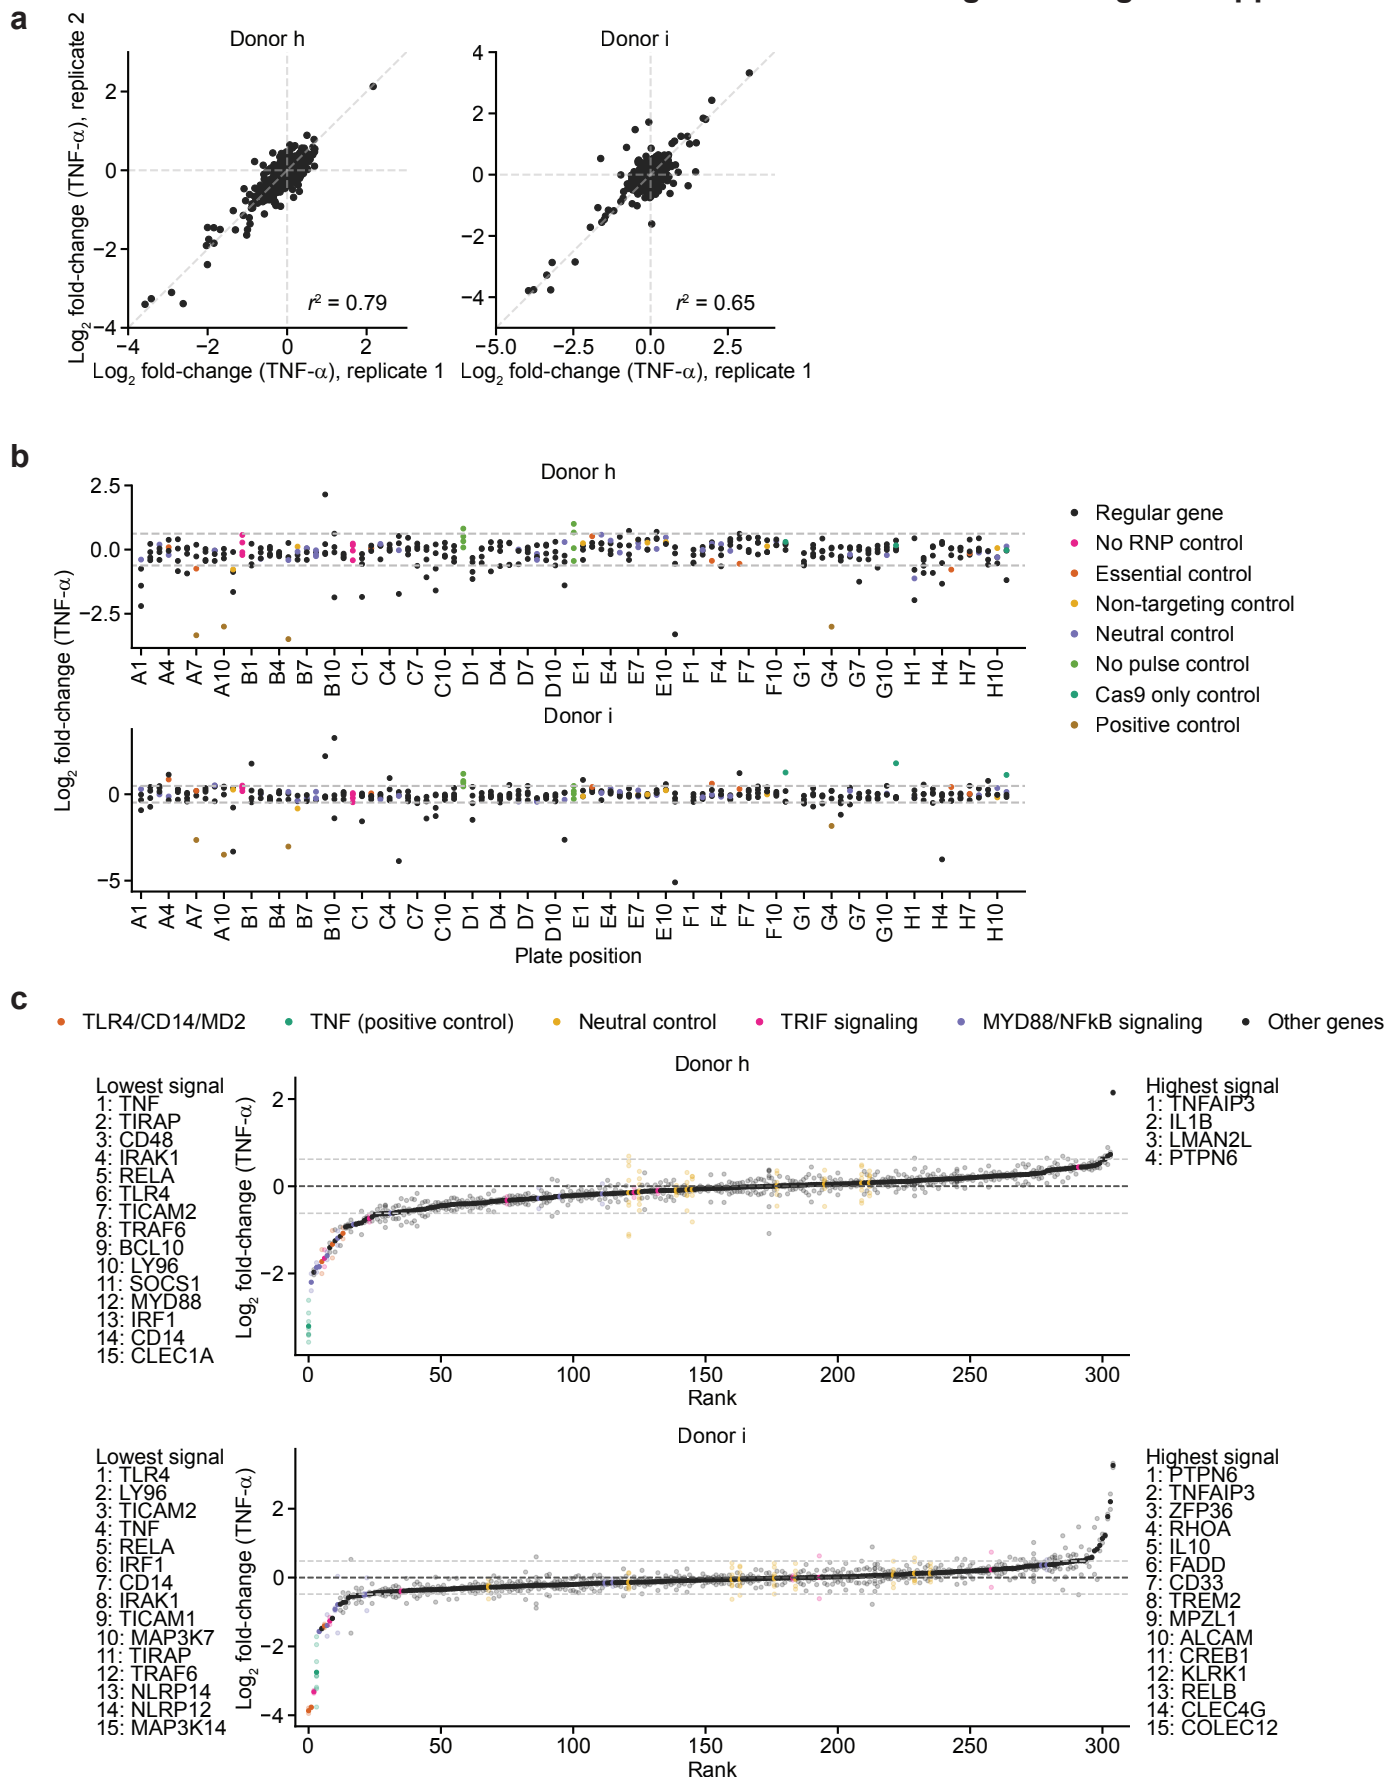

Supplement: supp [file elife-65856-supp-v1.zip › elife_poa_e65856_Figure_3_figure_supplement_5.pdf]
